# Supplementary material for: ncRNAs Orchestrate Chemosensitivity Induction by Neddylation Blockades
Source: Cancers (Basel). 2024 Feb 18;16(4):825. doi: 10.3390/cancers16040825 (PMC10886669; doi:10.3390/cancers16040825)
Supplement: Supplementary file 1 [file cancers-16-00825-s001.zip]

Archive with 6 entries (6 files):
- Source Data S1.xlsx
- Source Data S2.xlsx
- Source Data S3.xlsx
- Source Data S4.xlsx
- Source Data S5.xlsx
- Supplementary Figures S1-S3.pdf
