# Supplementary material for: ncRNAs Orchestrate Chemosensitivity Induction by Neddylation Blockades
Source: Cancers (Basel). 2024 Feb 18;16(4):825. doi: 10.3390/cancers16040825 (PMC10886669; doi:10.3390/cancers16040825)
Supplement: Supplementary file 1 [file cancers-16-00825-s001.zip › Source Data S1.xlsx]

## Sheet: A_VennDiagramInput
ens_id	tx
ENSG00000251455	Up_0.25_8h
ENSG00000232828	Up_0.25_8h
ENSG00000222432	Up_0.25_8h
ENSG00000279721	Up_0.25_8h
ENSG00000253107	Up_0.25_8h
ENSG00000253389	Up_0.25_8h
ENSG00000255964	Up_0.25_8h
ENSG00000275450	Up_0.25_8h
ENSG00000261734	Up_0.25_8h
ENSG00000278400	Up_0.25_8h
ENSG00000112981	Up_0.25_8h
ENSG00000236359	Up_0.25_8h
ENSG00000239780	Up_0.25_8h
ENSG00000269547	Up_0.25_8h
ENSG00000251246	Up_0.25_8h
ENSG00000248288	Up_0.25_8h
ENSG00000145103	Up_0.25_8h
ENSG00000261226	Up_0.25_8h
ENSG00000272180	Up_0.25_8h
ENSG00000267414	Up_0.25_8h
ENSG00000206895	Up_0.25_8h
ENSG00000284185	Up_0.25_8h
ENSG00000278957	Up_0.25_8h
ENSG00000236400	Up_0.25_8h
ENSG00000232259	Up_0.25_8h
ENSG00000188816	Up_0.25_8h
ENSG00000270372	Up_0.25_8h
ENSG00000272555	Up_0.25_8h
ENSG00000213877	Up_0.25_8h
ENSG00000265992	Up_0.25_8h
ENSG00000234409	Up_0.25_8h
ENSG00000260091	Up_0.25_8h
ENSG00000271086	Up_0.25_8h
ENSG00000260298	Up_0.25_8h
ENSG00000089041	Up_0.25_8h
ENSG00000237402	Up_0.25_8h
ENSG00000252343	Up_0.25_8h
ENSG00000132938	Up_0.25_8h
ENSG00000174332	Up_0.25_8h
ENSG00000201786	Up_0.25_8h
ENSG00000256824	Up_0.25_8h
ENSG00000202542	Up_0.25_8h
ENSG00000255129	Up_0.25_8h
ENSG00000244318	Up_0.25_8h
ENSG00000164483	Up_0.25_8h
ENSG00000240963	Up_0.25_8h
ENSG00000241678	Up_0.25_8h
ENSG00000271499	Up_0.25_8h
ENSG00000261514	Up_0.25_8h
ENSG00000226363	Up_0.25_8h
ENSG00000239486	Up_0.25_8h
ENSG00000280021	Up_0.25_8h
ENSG00000240160	Up_0.25_8h
ENSG00000260807	Up_0.25_8h
ENSG00000276892	Up_0.25_8h
ENSG00000175718	Up_0.25_8h
ENSG00000108381	Up_0.25_8h
ENSG00000233232	Up_0.25_8h
ENSG00000212864	Up_0.25_8h
ENSG00000198939	Up_0.25_8h
ENSG00000212445	Up_0.25_8h
ENSG00000175164	Up_0.25_8h
ENSG00000257579	Up_0.25_8h
ENSG00000134588	Up_0.25_8h
ENSG00000268993	Up_0.25_8h
ENSG00000230937	Up_0.25_8h
ENSG00000224896	Up_0.25_8h
ENSG00000182896	Up_0.25_8h
ENSG00000233967	Up_0.25_8h
ENSG00000240626	Up_0.25_8h
ENSG00000108771	Up_0.25_8h
ENSG00000225096	Up_0.25_8h
ENSG00000279578	Up_0.25_8h
ENSG00000258562	Up_0.25_8h
ENSG00000176716	Up_0.25_8h
ENSG00000257493	Up_0.25_8h
ENSG00000233540	Up_0.25_8h
ENSG00000172461	Up_0.25_8h
ENSG00000200873	Up_0.25_8h
ENSG00000226211	Up_0.25_8h
ENSG00000222849	Up_0.25_8h
ENSG00000265542	Up_0.25_8h
ENSG00000121797	Up_0.25_8h
ENSG00000239959	Up_0.25_8h
ENSG00000275504	Up_0.25_8h
ENSG00000148604	Up_0.25_8h
ENSG00000263724	Up_0.25_8h
ENSG00000225002	Up_0.25_8h
ENSG00000253063	Up_0.25_8h
ENSG00000283592	Up_0.25_8h
ENSG00000143365	Up_0.25_8h
ENSG00000231868	Up_0.25_8h
ENSG00000230088	Up_0.25_8h
ENSG00000230407	Up_0.25_8h
ENSG00000230314	Up_0.25_8h
ENSG00000228436	Up_0.25_8h
ENSG00000148795	Up_0.25_8h
ENSG00000267986	Up_0.25_8h
ENSG00000249650	Up_0.25_8h
ENSG00000198570	Up_0.25_8h
ENSG00000199550	Up_0.25_8h
ENSG00000109047	Up_0.25_8h
ENSG00000232900	Up_0.25_8h
ENSG00000267513	Up_0.25_8h
ENSG00000185972	Up_0.25_8h
ENSG00000230368	Up_0.25_8h
ENSG00000223220	Up_0.25_8h
ENSG00000007908	Up_0.25_8h
ENSG00000249755	Up_0.25_8h
ENSG00000198033	Up_0.25_8h
ENSG00000281162	Up_0.25_8h
ENSG00000199979	Up_0.25_8h
ENSG00000272442	Up_0.25_8h
ENSG00000117013	Up_0.25_8h
ENSG00000244197	Up_0.25_8h
ENSG00000240244	Up_0.25_8h
ENSG00000265555	Up_0.25_8h
ENSG00000264125	Up_0.25_8h
ENSG00000207274	Up_0.25_8h
ENSG00000229526	Up_0.25_8h
ENSG00000252562	Up_0.25_8h
ENSG00000212433	Up_0.25_8h
ENSG00000281491	Up_0.25_8h
ENSG00000253314	Up_0.25_8h
ENSG00000207270	Up_0.25_8h
ENSG00000237910	Up_0.25_8h
ENSG00000226669	Up_0.25_8h
ENSG00000275569	Up_0.25_8h
ENSG00000257472	Up_0.25_8h
ENSG00000283084	Up_0.25_8h
ENSG00000224361	Up_0.25_8h
ENSG00000280429	Up_0.25_8h
ENSG00000260932	Up_0.25_8h
ENSG00000133328	Up_0.25_8h
ENSG00000257808	Up_0.25_8h
ENSG00000267477	Up_0.25_8h
ENSG00000207746	Up_0.25_8h
ENSG00000229744	Up_0.25_8h
ENSG00000259540	Up_0.25_8h
ENSG00000180209	Up_0.25_8h
ENSG00000280390	Up_0.25_8h
ENSG00000257642	Up_0.25_8h
ENSG00000139549	Up_0.25_8h
ENSG00000132744	Up_0.25_8h
ENSG00000284386	Up_0.25_8h
ENSG00000248746	Up_0.25_8h
ENSG00000240641	Up_0.25_8h
ENSG00000275630	Up_0.25_8h
ENSG00000224907	Up_0.25_8h
ENSG00000237224	Up_0.25_8h
ENSG00000284708	Up_0.25_8h
ENSG00000171916	Up_0.25_8h
ENSG00000225449	Up_0.25_8h
ENSG00000236722	Up_0.25_8h
ENSG00000173262	Up_0.25_8h
ENSG00000242195	Up_0.25_8h
ENSG00000187186	Up_0.25_8h
ENSG00000276489	Up_0.25_8h
ENSG00000267145	Up_0.25_8h
ENSG00000215838	Up_0.25_8h
ENSG00000260141	Up_0.25_8h
ENSG00000283638	Up_0.25_8h
ENSG00000267246	Up_0.25_8h
ENSG00000091138	Up_0.25_8h
ENSG00000230122	Up_0.25_8h
ENSG00000269622	Up_0.25_8h
ENSG00000138964	Up_0.25_8h
ENSG00000280299	Up_0.25_8h
ENSG00000232377	Up_0.25_8h
ENSG00000201554	Up_0.25_8h
ENSG00000251389	Up_0.25_8h
ENSG00000250050	Up_0.25_8h
ENSG00000099953	Up_0.25_8h
ENSG00000125954	Up_0.25_8h
ENSG00000257906	Up_0.25_8h
ENSG00000265158	Up_0.25_8h
ENSG00000202285	Up_0.25_8h
ENSG00000270921	Up_0.25_8h
ENSG00000273485	Up_0.25_8h
ENSG00000257524	Up_0.25_8h
ENSG00000273141	Up_0.25_8h
ENSG00000265539	Up_0.25_8h
ENSG00000189401	Up_0.25_8h
ENSG00000189058	Up_0.25_8h
ENSG00000277543	Up_0.25_8h
ENSG00000242863	Up_0.25_8h
ENSG00000165194	Up_0.25_8h
ENSG00000199306	Up_0.25_8h
ENSG00000237754	Up_0.25_8h
ENSG00000251025	Up_0.25_8h
ENSG00000222985	Up_0.25_8h
ENSG00000175544	Up_0.25_8h
ENSG00000269881	Up_0.25_8h
ENSG00000283930	Up_0.25_8h
ENSG00000245812	Up_0.25_8h
ENSG00000276727	Up_0.25_8h
ENSG00000156206	Up_0.25_8h
ENSG00000276569	Up_0.25_8h
ENSG00000284259	Up_0.25_8h
ENSG00000260750	Up_0.25_8h
ENSG00000263468	Up_0.25_8h
ENSG00000244039	Up_0.25_8h
ENSG00000200831	Up_0.25_8h
ENSG00000277866	Up_0.25_8h
ENSG00000283239	Up_0.25_8h
ENSG00000234071	Up_0.25_8h
ENSG00000135482	Up_0.25_8h
ENSG00000266553	Up_0.25_8h
ENSG00000225028	Up_0.25_8h
ENSG00000261618	Up_0.25_8h
ENSG00000163116	Up_0.25_8h
ENSG00000237620	Up_0.25_8h
ENSG00000207654	Up_0.25_8h
ENSG00000201209	Up_0.25_8h
ENSG00000278177	Up_0.25_8h
ENSG00000199483	Up_0.25_8h
ENSG00000183508	Up_0.25_8h
ENSG00000272817	Up_0.25_8h
ENSG00000283597	Up_0.25_8h
ENSG00000206611	Up_0.25_8h
ENSG00000275695	Up_0.25_8h
ENSG00000199564	Up_0.25_8h
ENSG00000228470	Up_0.25_8h
ENSG00000207932	Up_0.25_8h
ENSG00000261305	Up_0.25_8h
ENSG00000264484	Up_0.25_8h
ENSG00000200421	Up_0.25_8h
ENSG00000117594	Up_0.25_8h
ENSG00000196345	Up_0.25_8h
ENSG00000250122	Up_0.25_8h
ENSG00000101638	Up_0.25_8h
ENSG00000102239	Up_0.25_8h
ENSG00000092850	Up_0.25_8h
ENSG00000283469	Up_0.25_8h
ENSG00000248343	Up_0.25_8h
ENSG00000271798	Up_0.25_8h
ENSG00000180613	Up_0.25_8h
ENSG00000114113	Up_0.25_8h
ENSG00000228596	Up_0.25_8h
ENSG00000075891	Up_0.25_8h
ENSG00000219757	Up_0.25_8h
ENSG00000248919	Up_0.25_8h
ENSG00000167346	Up_0.25_8h
ENSG00000146122	Up_0.25_8h
ENSG00000231906	Up_0.25_8h
ENSG00000228711	Up_0.25_8h
ENSG00000252034	Up_0.25_8h
ENSG00000207204	Up_0.25_8h
ENSG00000233862	Up_0.25_8h
ENSG00000223511	Up_0.25_8h
ENSG00000250222	Up_0.25_8h
ENSG00000267136	Up_0.25_8h
ENSG00000266232	Up_0.25_8h
ENSG00000259849	Up_0.25_8h
ENSG00000279650	Up_0.25_8h
ENSG00000121552	Up_0.25_8h
ENSG00000267077	Up_0.25_8h
ENSG00000178363	Up_0.25_8h
ENSG00000268745	Up_0.25_8h
ENSG00000130055	Up_0.25_8h
ENSG00000200156	Up_0.25_8h
ENSG00000236908	Up_0.25_8h
ENSG00000254235	Up_0.25_8h
ENSG00000075073	Up_0.25_8h
ENSG00000182747	Up_0.25_8h
ENSG00000201180	Up_0.25_8h
ENSG00000121381	Up_0.25_8h
ENSG00000115155	Up_0.25_8h
ENSG00000248494	Up_0.25_8h
ENSG00000280322	Up_0.25_8h
ENSG00000179058	Up_0.25_8h
ENSG00000251503	Up_0.25_8h
ENSG00000158008	Up_0.25_8h
ENSG00000276063	Up_0.25_8h
ENSG00000199377	Up_0.25_8h
ENSG00000156219	Up_0.25_8h
ENSG00000252490	Up_0.25_8h
ENSG00000242137	Up_0.25_8h
ENSG00000199865	Up_0.25_8h
ENSG00000231780	Up_0.25_8h
ENSG00000276869	Up_0.25_8h
ENSG00000255362	Up_0.25_8h
ENSG00000225502	Up_0.25_8h
ENSG00000240419	Up_0.25_8h
ENSG00000201297	Up_0.25_8h
ENSG00000219776	Up_0.25_8h
ENSG00000168967	Up_0.25_8h
ENSG00000280409	Up_0.25_8h
ENSG00000237993	Up_0.25_8h
ENSG00000249840	Up_0.25_8h
ENSG00000259117	Up_0.25_8h
ENSG00000221305	Up_0.25_8h
ENSG00000233325	Up_0.25_8h
ENSG00000267059	Up_0.25_8h
ENSG00000258731	Up_0.25_8h
ENSG00000266274	Up_0.25_8h
ENSG00000197332	Up_0.25_8h
ENSG00000257943	Up_0.25_8h
ENSG00000275072	Up_0.25_8h
ENSG00000259407	Up_0.25_8h
ENSG00000179066	Up_0.25_8h
ENSG00000199290	Up_0.25_8h
ENSG00000272733	Up_0.25_8h
ENSG00000259792	Up_0.25_8h
ENSG00000275383	Up_0.25_8h
ENSG00000284607	Up_0.25_8h
ENSG00000260677	Up_0.25_8h
ENSG00000260740	Up_0.25_8h
ENSG00000236807	Up_0.25_8h
ENSG00000270935	Up_0.25_8h
ENSG00000196115	Up_0.25_8h
ENSG00000224363	Up_0.25_8h
ENSG00000274245	Up_0.25_8h
ENSG00000260522	Up_0.25_8h
ENSG00000234340	Up_0.25_8h
ENSG00000229500	Up_0.25_8h
ENSG00000258781	Up_0.25_8h
ENSG00000263643	Up_0.25_8h
ENSG00000069764	Up_0.25_8h
ENSG00000169255	Up_0.25_8h
ENSG00000276972	Up_0.25_8h
ENSG00000253691	Up_0.25_8h
ENSG00000116176	Up_0.25_8h
ENSG00000284718	Up_0.25_8h
ENSG00000185385	Up_0.25_8h
ENSG00000121075	Up_0.25_8h
ENSG00000182853	Up_0.25_8h
ENSG00000206583	Up_0.25_8h
ENSG00000187690	Up_0.25_8h
ENSG00000198155	Up_0.25_8h
ENSG00000182531	Up_0.25_8h
ENSG00000241983	Up_0.25_8h
ENSG00000199109	Up_0.25_8h
ENSG00000211645	Up_0.25_8h
ENSG00000258096	Up_0.25_8h
ENSG00000187533	Up_0.25_8h
ENSG00000207008	Up_0.25_8h
ENSG00000136286	Up_0.25_8h
ENSG00000218052	Up_0.25_8h
ENSG00000261592	Up_0.25_8h
ENSG00000279030	Up_0.25_8h
ENSG00000115461	Up_0.25_8h
ENSG00000178175	Up_0.25_8h
ENSG00000220600	Up_0.25_8h
ENSG00000197880	Up_0.25_8h
ENSG00000222305	Up_0.25_8h
ENSG00000215483	Up_0.25_8h
ENSG00000252431	Up_0.25_8h
ENSG00000283923	Up_0.25_8h
ENSG00000212930	Up_0.25_8h
ENSG00000235148	Up_0.25_8h
ENSG00000248099	Up_0.25_8h
ENSG00000220237	Up_0.25_8h
ENSG00000277591	Up_0.25_8h
ENSG00000240940	Up_0.25_8h
ENSG00000128709	Up_0.25_8h
ENSG00000279134	Up_0.25_8h
ENSG00000269993	Up_0.25_8h
ENSG00000242636	Up_0.25_8h
ENSG00000258561	Up_0.25_8h
ENSG00000204949	Up_0.25_8h
ENSG00000148215	Up_0.25_8h
ENSG00000252400	Up_0.25_8h
ENSG00000105808	Up_0.25_8h
ENSG00000272885	Up_0.25_8h
ENSG00000136237	Up_0.25_8h
ENSG00000228453	Up_0.25_8h
ENSG00000124212	Up_0.25_8h
ENSG00000264150	Up_0.25_8h
ENSG00000238410	Up_0.25_8h
ENSG00000258488	Up_0.25_8h
ENSG00000266265	Up_0.25_8h
ENSG00000163737	Up_0.25_8h
ENSG00000274835	Up_0.25_8h
ENSG00000243323	Up_0.25_8h
ENSG00000207032	Up_0.25_8h
ENSG00000258928	Up_0.25_8h
ENSG00000201600	Up_0.25_8h
ENSG00000257987	Up_0.25_8h
ENSG00000257588	Up_0.25_8h
ENSG00000232576	Up_0.25_8h
ENSG00000240224	Up_0.25_8h
ENSG00000226957	Up_0.25_8h
ENSG00000244607	Up_0.25_8h
ENSG00000260657	Up_0.25_8h
ENSG00000276026	Up_0.25_8h
ENSG00000163060	Up_0.25_8h
ENSG00000227431	Up_0.25_8h
ENSG00000266421	Up_0.25_8h
ENSG00000170509	Up_0.25_8h
ENSG00000234231	Up_0.25_8h
ENSG00000207386	Up_0.25_8h
ENSG00000276842	Up_0.25_8h
ENSG00000267108	Up_0.25_8h
ENSG00000233912	Up_0.25_8h
ENSG00000222640	Up_0.25_8h
ENSG00000232198	Up_0.25_8h
ENSG00000224312	Up_0.25_8h
ENSG00000264458	Up_0.25_8h
ENSG00000202035	Up_0.25_8h
ENSG00000256209	Up_0.25_8h
ENSG00000249198	Up_0.25_8h
ENSG00000237008	Up_0.25_8h
ENSG00000200597	Up_0.25_8h
ENSG00000249082	Up_0.25_8h
ENSG00000113525	Up_0.25_8h
ENSG00000264964	Up_0.25_8h
ENSG00000263813	Up_0.25_8h
ENSG00000279388	Up_0.25_8h
ENSG00000273336	Up_0.25_8h
ENSG00000228692	Up_0.25_8h
ENSG00000270625	Up_0.25_8h
ENSG00000256720	Up_0.25_8h
ENSG00000252914	Up_0.25_8h
ENSG00000252857	Up_0.25_8h
ENSG00000213669	Up_0.25_8h
ENSG00000134640	Up_0.25_8h
ENSG00000269220	Up_0.25_8h
ENSG00000271387	Up_0.25_8h
ENSG00000250472	Up_0.25_8h
ENSG00000276302	Up_0.25_8h
ENSG00000240710	Up_0.25_8h
ENSG00000214651	Up_0.25_8h
ENSG00000168995	Up_0.25_8h
ENSG00000242291	Up_0.25_8h
ENSG00000252425	Up_0.25_8h
ENSG00000186234	Up_0.25_8h
ENSG00000207167	Up_0.25_8h
ENSG00000229682	Up_0.25_8h
ENSG00000179520	Up_0.25_8h
ENSG00000278517	Up_0.25_8h
ENSG00000270926	Up_0.25_8h
ENSG00000237365	Up_0.25_8h
ENSG00000256355	Up_0.25_8h
ENSG00000241744	Up_0.25_8h
ENSG00000267676	Up_0.25_8h
ENSG00000279523	Up_0.25_8h
ENSG00000278399	Up_0.25_8h
ENSG00000272896	Up_0.25_8h
ENSG00000263155	Up_0.25_8h
ENSG00000212469	Up_0.25_8h
ENSG00000283197	Up_0.25_8h
ENSG00000275667	Up_0.25_8h
ENSG00000206172	Up_0.25_8h
ENSG00000233259	Up_0.25_8h
ENSG00000251108	Up_0.25_8h
ENSG00000212319	Up_0.25_8h
ENSG00000275493	Up_0.25_8h
ENSG00000283932	Up_0.25_8h
ENSG00000266185	Up_0.25_8h
ENSG00000226744	Up_0.25_8h
ENSG00000280395	Up_0.25_8h
ENSG00000162374	Up_0.25_8h
ENSG00000199733	Up_0.25_8h
ENSG00000206676	Up_0.25_8h
ENSG00000213149	Up_0.25_8h
ENSG00000226671	Up_0.25_8h
ENSG00000284546	Up_0.25_8h
ENSG00000112902	Up_0.25_8h
ENSG00000205971	Up_0.25_8h
ENSG00000143340	Up_0.25_8h
ENSG00000173976	Up_0.25_8h
ENSG00000275091	Up_0.25_8h
ENSG00000240189	Up_0.25_8h
ENSG00000220771	Up_0.25_8h
ENSG00000156886	Up_0.25_8h
ENSG00000232375	Up_0.25_8h
ENSG00000267205	Up_0.25_8h
ENSG00000225075	Up_0.25_8h
ENSG00000243758	Up_0.25_8h
ENSG00000242998	Up_0.25_8h
ENSG00000259363	Up_0.25_8h
ENSG00000229930	Up_0.25_8h
ENSG00000277524	Up_0.25_8h
ENSG00000007171	Up_0.25_8h
ENSG00000265863	Up_0.25_8h
ENSG00000278929	Up_0.25_8h
ENSG00000160224	Up_0.25_8h
ENSG00000064886	Up_0.25_8h
ENSG00000135144	Up_0.25_8h
ENSG00000261357	Up_0.25_8h
ENSG00000283442	Up_0.25_8h
ENSG00000231728	Up_0.25_8h
ENSG00000243081	Up_0.25_8h
ENSG00000113763	Up_0.25_8h
ENSG00000263772	Up_0.25_8h
ENSG00000257264	Up_0.25_8h
ENSG00000237181	Up_0.25_8h
ENSG00000155530	Up_0.25_8h
ENSG00000262412	Up_0.25_8h
ENSG00000251572	Up_0.25_8h
ENSG00000148053	Up_0.25_8h
ENSG00000243539	Up_0.25_8h
ENSG00000231359	Up_0.25_8h
ENSG00000248787	Up_0.25_8h
ENSG00000256902	Up_0.25_8h
ENSG00000255452	Up_0.25_8h
ENSG00000231407	Up_0.25_8h
ENSG00000278683	Up_0.25_8h
ENSG00000223274	Up_0.25_8h
ENSG00000231530	Up_0.25_8h
ENSG00000279796	Up_0.25_8h
ENSG00000283235	Up_0.25_8h
ENSG00000260443	Up_0.25_8h
ENSG00000168484	Up_0.25_8h
ENSG00000197428	Up_0.25_8h
ENSG00000252552	Up_0.25_8h
ENSG00000271057	Up_0.25_8h
ENSG00000169306	Up_0.25_8h
ENSG00000244413	Up_0.25_8h
ENSG00000172236	Up_0.25_8h
ENSG00000232798	Up_0.25_8h
ENSG00000204710	Up_0.25_8h
ENSG00000261227	Up_0.25_8h
ENSG00000274198	Up_0.25_8h
ENSG00000215812	Up_0.25_8h
ENSG00000249928	Up_0.25_8h
ENSG00000223810	Up_0.25_8h
ENSG00000223430	Up_0.25_8h
ENSG00000266527	Up_0.25_8h
ENSG00000256206	Up_0.25_8h
ENSG00000103353	Up_0.25_8h
ENSG00000175189	Up_0.25_8h
ENSG00000255292	Up_0.25_8h
ENSG00000221332	Up_0.25_8h
ENSG00000222515	Up_0.25_8h
ENSG00000269711	Up_0.25_8h
ENSG00000254330	Up_0.25_8h
ENSG00000207380	Up_0.25_8h
ENSG00000273573	Up_0.25_8h
ENSG00000175206	Up_0.25_8h
ENSG00000209480	Up_0.25_8h
ENSG00000234019	Up_0.25_8h
ENSG00000196335	Up_0.25_8h
ENSG00000243051	Up_0.25_8h
ENSG00000266830	Up_0.25_8h
ENSG00000268545	Up_0.25_8h
ENSG00000244066	Up_0.25_8h
ENSG00000230376	Up_0.25_8h
ENSG00000261449	Up_0.25_8h
ENSG00000227158	Up_0.25_8h
ENSG00000241905	Up_0.25_8h
ENSG00000281808	Up_0.25_8h
ENSG00000255075	Up_0.25_8h
ENSG00000201413	Up_0.25_8h
ENSG00000207923	Up_0.25_8h
ENSG00000204989	Up_0.25_8h
ENSG00000237475	Up_0.25_8h
ENSG00000231165	Up_0.25_8h
ENSG00000249654	Up_0.25_8h
ENSG00000277211	Up_0.25_8h
ENSG00000233735	Up_0.25_8h
ENSG00000199023	Up_0.25_8h
ENSG00000143278	Up_0.25_8h
ENSG00000254792	Up_0.25_8h
ENSG00000131864	Up_0.25_8h
ENSG00000277631	Up_0.25_8h
ENSG00000107611	Up_0.25_8h
ENSG00000284239	Up_0.25_8h
ENSG00000252859	Up_0.25_8h
ENSG00000165188	Up_0.25_8h
ENSG00000231079	Up_0.25_8h
ENSG00000230947	Up_0.25_8h
ENSG00000180871	Up_0.25_8h
ENSG00000238749	Up_0.25_8h
ENSG00000279391	Up_0.25_8h
ENSG00000157211	Up_0.25_8h
ENSG00000271245	Up_0.25_8h
ENSG00000228804	Up_0.25_8h
ENSG00000239615	Up_0.25_8h
ENSG00000280878	Up_0.25_8h
ENSG00000280778	Up_0.25_8h
ENSG00000276225	Up_0.25_8h
ENSG00000232780	Up_0.25_8h
ENSG00000227510	Up_0.25_8h
ENSG00000255853	Up_0.25_8h
ENSG00000271027	Up_0.25_8h
ENSG00000214853	Up_0.25_8h
ENSG00000251443	Up_0.25_8h
ENSG00000266043	Up_0.25_8h
ENSG00000226842	Up_0.25_8h
ENSG00000283443	Up_0.25_8h
ENSG00000269107	Up_0.25_8h
ENSG00000231738	Up_0.25_8h
ENSG00000258744	Up_0.25_8h
ENSG00000150281	Up_0.25_8h
ENSG00000151005	Up_0.25_8h
ENSG00000135569	Up_0.25_8h
ENSG00000270326	Up_0.25_8h
ENSG00000268790	Up_0.25_8h
ENSG00000201407	Up_0.25_8h
ENSG00000204904	Up_0.25_8h
ENSG00000252179	Up_0.25_8h
ENSG00000255232	Up_0.25_8h
ENSG00000240093	Up_0.25_8h
ENSG00000274654	Up_0.25_8h
ENSG00000173567	Up_0.25_8h
ENSG00000212539	Up_0.25_8h
ENSG00000201161	Up_0.25_8h
ENSG00000224961	Up_0.25_8h
ENSG00000223601	Up_0.25_8h
ENSG00000197934	Up_0.25_8h
ENSG00000234239	Up_0.25_8h
ENSG00000269615	Up_0.25_8h
ENSG00000260070	Up_0.25_8h
ENSG00000241933	Up_0.25_8h
ENSG00000137727	Up_0.25_8h
ENSG00000283496	Up_0.25_8h
ENSG00000267195	Up_0.25_8h
ENSG00000102032	Up_0.25_8h
ENSG00000251893	Up_0.25_8h
ENSG00000197863	Up_0.25_8h
ENSG00000243069	Up_0.25_8h
ENSG00000092529	Up_0.25_8h
ENSG00000240698	Up_0.25_8h
ENSG00000238685	Up_0.25_8h
ENSG00000200408	Up_0.25_8h
ENSG00000206908	Up_0.25_8h
ENSG00000246526	Up_0.25_8h
ENSG00000271977	Up_0.25_8h
ENSG00000201725	Up_0.25_8h
ENSG00000201607	Up_0.25_8h
ENSG00000238032	Up_0.25_8h
ENSG00000258225	Up_0.25_8h
ENSG00000234829	Up_0.25_8h
ENSG00000212479	Up_0.25_8h
ENSG00000267047	Up_0.25_8h
ENSG00000229956	Up_0.25_8h
ENSG00000225446	Up_0.25_8h
ENSG00000248928	Up_0.25_8h
ENSG00000207147	Up_0.25_8h
ENSG00000257225	Up_0.25_8h
ENSG00000168928	Up_0.25_8h
ENSG00000264274	Up_0.25_8h
ENSG00000172457	Up_0.25_8h
ENSG00000239367	Up_0.25_8h
ENSG00000258048	Up_0.25_8h
ENSG00000198997	Up_0.25_8h
ENSG00000198835	Up_0.25_8h
ENSG00000277588	Up_0.25_8h
ENSG00000251338	Up_0.25_8h
ENSG00000255538	Up_0.25_8h
ENSG00000205856	Up_0.25_8h
ENSG00000261390	Up_0.25_8h
ENSG00000167476	Up_0.25_8h
ENSG00000139193	Up_0.25_8h
ENSG00000258170	Up_0.25_8h
ENSG00000241174	Up_0.25_8h
ENSG00000238585	Up_0.25_8h
ENSG00000225574	Up_0.25_8h
ENSG00000187980	Up_0.25_8h
ENSG00000227613	Up_0.25_8h
ENSG00000207014	Up_0.25_8h
ENSG00000240902	Up_0.25_8h
ENSG00000260303	Up_0.25_8h
ENSG00000276233	Up_0.25_8h
ENSG00000244559	Up_0.25_8h
ENSG00000284667	Up_0.25_8h
ENSG00000145147	Up_0.25_8h
ENSG00000236340	Up_0.25_8h
ENSG00000235120	Up_0.25_8h
ENSG00000272096	Up_0.25_8h
ENSG00000241101	Up_0.25_8h
ENSG00000225602	Up_0.25_8h
ENSG00000258169	Up_0.25_8h
ENSG00000266148	Up_0.25_8h
ENSG00000260483	Up_0.25_8h
ENSG00000280086	Up_0.25_8h
ENSG00000206028	Up_0.25_8h
ENSG00000206957	Up_0.25_8h
ENSG00000258826	Up_0.25_8h
ENSG00000260719	Up_0.25_8h
ENSG00000278469	Up_0.25_8h
ENSG00000270259	Up_0.25_8h
ENSG00000206638	Up_0.25_8h
ENSG00000199735	Up_0.25_8h
ENSG00000201253	Up_0.25_8h
ENSG00000225100	Up_0.25_8h
ENSG00000149418	Up_0.25_8h
ENSG00000199568	Up_0.25_8h
ENSG00000186334	Up_0.25_8h
ENSG00000220563	Up_0.25_8h
ENSG00000200579	Up_0.25_8h
ENSG00000266248	Up_0.25_8h
ENSG00000242552	Up_0.25_8h
ENSG00000264706	Up_0.25_8h
ENSG00000274704	Up_0.25_8h
ENSG00000249175	Up_0.25_8h
ENSG00000284725	Up_0.25_8h
ENSG00000187747	Up_0.25_8h
ENSG00000275904	Up_0.25_8h
ENSG00000137709	Up_0.25_8h
ENSG00000197674	Up_0.25_8h
ENSG00000264490	Up_0.25_8h
ENSG00000142233	Up_0.25_8h
ENSG00000250654	Up_0.25_8h
ENSG00000256347	Up_0.25_8h
ENSG00000174453	Up_0.25_8h
ENSG00000221737	Up_0.25_8h
ENSG00000275763	Up_0.25_8h
ENSG00000217379	Up_0.25_8h
ENSG00000204644	Up_0.25_8h
ENSG00000236838	Up_0.25_8h
ENSG00000248112	Up_0.25_8h
ENSG00000243016	Up_0.25_8h
ENSG00000251353	Up_0.25_8h
ENSG00000200095	Up_0.25_8h
ENSG00000238010	Up_0.25_8h
ENSG00000275646	Up_0.25_8h
ENSG00000221476	Up_0.25_8h
ENSG00000206811	Up_0.25_8h
ENSG00000238189	Up_0.25_8h
ENSG00000251452	Up_0.25_8h
ENSG00000242121	Up_0.25_8h
ENSG00000228707	Up_0.25_8h
ENSG00000254779	Up_0.25_8h
ENSG00000225039	Up_0.25_8h
ENSG00000277726	Up_0.25_8h
ENSG00000255521	Up_0.25_8h
ENSG00000268747	Up_0.25_8h
ENSG00000223951	Up_0.25_8h
ENSG00000273923	Up_0.25_8h
ENSG00000233026	Up_0.25_8h
ENSG00000170956	Up_0.25_8h
ENSG00000279667	Up_0.25_8h
ENSG00000200314	Up_0.25_8h
ENSG00000110975	Up_0.25_8h
ENSG00000223503	Up_0.25_8h
ENSG00000271443	Up_0.25_8h
ENSG00000273342	Up_0.25_8h
ENSG00000185345	Up_0.25_8h
ENSG00000226649	Up_0.25_8h
ENSG00000266909	Up_0.25_8h
ENSG00000260286	Up_0.25_8h
ENSG00000234592	Up_0.25_8h
ENSG00000232891	Up_0.25_8h
ENSG00000255450	Up_0.25_8h
ENSG00000177673	Up_0.25_8h
ENSG00000223113	Up_0.25_8h
ENSG00000226430	Up_0.25_8h
ENSG00000248751	Up_0.25_8h
ENSG00000267523	Up_0.25_8h
ENSG00000228983	Up_0.25_8h
ENSG00000224992	Up_0.25_8h
ENSG00000283462	Up_0.25_8h
ENSG00000158270	Up_0.25_8h
ENSG00000264075	Up_0.25_8h
ENSG00000251655	Up_0.25_8h
ENSG00000163612	Up_0.25_8h
ENSG00000258906	Up_0.25_8h
ENSG00000251675	Up_0.25_8h
ENSG00000261296	Up_0.25_8h
ENSG00000248295	Up_0.25_8h
ENSG00000275248	Up_0.25_8h
ENSG00000241625	Up_0.25_8h
ENSG00000232656	Up_0.25_8h
ENSG00000099960	Up_0.25_8h
ENSG00000136110	Up_0.25_8h
ENSG00000236525	Up_0.25_8h
ENSG00000231441	Up_0.25_8h
ENSG00000236242	Up_0.25_8h
ENSG00000254959	Up_0.25_8h
ENSG00000251914	Up_0.25_8h
ENSG00000145832	Up_0.25_8h
ENSG00000250734	Up_0.25_8h
ENSG00000173467	Up_0.25_8h
ENSG00000133937	Up_0.25_8h
ENSG00000239799	Up_0.25_8h
ENSG00000225904	Up_0.25_8h
ENSG00000198083	Up_0.25_8h
ENSG00000164746	Up_0.25_8h
ENSG00000213778	Up_0.25_8h
ENSG00000261083	Up_0.25_8h
ENSG00000276304	Up_0.25_8h
ENSG00000200029	Up_0.25_8h
ENSG00000204282	Up_0.25_8h
ENSG00000225856	Up_0.25_8h
ENSG00000138316	Up_0.25_8h
ENSG00000230932	Up_0.25_8h
ENSG00000240624	Up_0.25_8h
ENSG00000234676	Up_0.25_8h
ENSG00000224939	Up_0.25_8h
ENSG00000273724	Up_0.25_8h
ENSG00000270367	Up_0.25_8h
ENSG00000182223	Up_0.25_8h
ENSG00000266149	Up_0.25_8h
ENSG00000267028	Up_0.25_8h
ENSG00000260926	Up_0.25_8h
ENSG00000233296	Up_0.25_8h
ENSG00000237257	Up_0.25_8h
ENSG00000168081	Up_0.25_8h
ENSG00000204538	Up_0.25_8h
ENSG00000261459	Up_0.25_8h
ENSG00000278518	Up_0.25_8h
ENSG00000207158	Up_0.25_8h
ENSG00000238097	Up_0.25_8h
ENSG00000203635	Up_0.25_8h
ENSG00000198261	Up_0.25_8h
ENSG00000207024	Up_0.25_8h
ENSG00000234578	Up_0.25_8h
ENSG00000276317	Up_0.25_8h
ENSG00000229754	Up_0.25_8h
ENSG00000264192	Up_0.25_8h
ENSG00000228113	Up_0.25_8h
ENSG00000267385	Up_0.25_8h
ENSG00000171501	Up_0.25_8h
ENSG00000207276	Up_0.25_8h
ENSG00000278592	Up_0.25_8h
ENSG00000280257	Up_0.25_8h
ENSG00000254233	Up_0.25_8h
ENSG00000268970	Up_0.25_8h
ENSG00000224299	Up_0.25_8h
ENSG00000053328	Up_0.25_8h
ENSG00000221507	Up_0.25_8h
ENSG00000210839	Up_0.25_8h
ENSG00000277506	Up_0.25_8h
ENSG00000253562	Up_0.25_8h
ENSG00000156140	Up_0.25_8h
ENSG00000207170	Up_0.25_8h
ENSG00000214563	Up_0.25_8h
ENSG00000239539	Up_0.25_8h
ENSG00000257999	Up_0.25_8h
ENSG00000147246	Up_0.25_8h
ENSG00000228886	Up_0.25_8h
ENSG00000181652	Up_0.25_8h
ENSG00000213650	Up_0.25_8h
ENSG00000267793	Up_0.25_8h
ENSG00000229311	Up_0.25_8h
ENSG00000231829	Up_0.25_8h
ENSG00000266933	Up_0.25_8h
ENSG00000229652	Up_0.25_8h
ENSG00000199082	Up_0.25_8h
ENSG00000236297	Up_0.25_8h
ENSG00000267559	Up_0.25_8h
ENSG00000260357	Up_0.25_8h
ENSG00000259040	Up_0.25_8h
ENSG00000224560	Up_0.25_8h
ENSG00000259356	Up_0.25_8h
ENSG00000264149	Up_0.25_8h
ENSG00000217557	Up_0.25_8h
ENSG00000198974	Up_0.25_8h
ENSG00000233792	Up_0.25_8h
ENSG00000284060	Up_0.25_8h
ENSG00000236132	Up_0.25_8h
ENSG00000241592	Up_0.25_8h
ENSG00000205899	Up_0.25_8h
ENSG00000242703	Up_0.25_8h
ENSG00000225000	Up_0.25_8h
ENSG00000270495	Up_0.25_8h
ENSG00000196350	Up_0.25_8h
ENSG00000179934	Up_0.25_8h
ENSG00000233780	Up_0.25_8h
ENSG00000256982	Up_0.25_8h
ENSG00000164100	Up_0.25_8h
ENSG00000253048	Up_0.25_8h
ENSG00000259186	Up_0.25_8h
ENSG00000200224	Up_0.25_8h
ENSG00000264163	Up_0.25_8h
ENSG00000230841	Up_0.25_8h
ENSG00000007314	Up_0.25_8h
ENSG00000278962	Up_0.25_8h
ENSG00000218213	Up_0.25_8h
ENSG00000229245	Up_0.25_8h
ENSG00000235056	Up_0.25_8h
ENSG00000250577	Up_0.25_8h
ENSG00000233681	Up_0.25_8h
ENSG00000280310	Up_0.25_8h
ENSG00000274350	Up_0.25_8h
ENSG00000258962	Up_0.25_8h
ENSG00000275591	Up_0.25_8h
ENSG00000276702	Up_0.25_8h
ENSG00000259208	Up_0.25_8h
ENSG00000261615	Up_0.25_8h
ENSG00000284196	Up_0.25_8h
ENSG00000227995	Up_0.25_8h
ENSG00000234842	Up_0.25_8h
ENSG00000274716	Up_0.25_8h
ENSG00000262213	Up_0.25_8h
ENSG00000230528	Up_0.25_8h
ENSG00000204539	Up_0.25_8h
ENSG00000133116	Up_0.25_8h
ENSG00000180019	Up_0.25_8h
ENSG00000241943	Up_0.25_8h
ENSG00000231777	Up_0.25_8h
ENSG00000204529	Up_0.25_8h
ENSG00000269403	Up_0.25_8h
ENSG00000252186	Up_0.25_8h
ENSG00000241032	Up_0.25_8h
ENSG00000267606	Up_0.25_8h
ENSG00000278754	Up_0.25_8h
ENSG00000170409	Up_0.25_8h
ENSG00000275038	Up_0.25_8h
ENSG00000262995	Up_0.25_8h
ENSG00000234303	Up_0.25_8h
ENSG00000260621	Up_0.25_8h
ENSG00000279704	Up_0.25_8h
ENSG00000244392	Up_0.25_8h
ENSG00000273331	Up_0.25_8h
ENSG00000258935	Up_0.25_8h
ENSG00000231613	Up_0.25_8h
ENSG00000260646	Up_0.25_8h
ENSG00000272592	Up_0.25_8h
ENSG00000263944	Up_0.25_8h
ENSG00000250500	Up_0.25_8h
ENSG00000250794	Up_0.25_8h
ENSG00000261959	Up_0.25_8h
ENSG00000132972	Up_0.25_8h
ENSG00000267552	Up_0.25_8h
ENSG00000271892	Up_0.25_8h
ENSG00000258133	Up_0.25_8h
ENSG00000242559	Up_0.25_8h
ENSG00000235937	Up_0.25_8h
ENSG00000162344	Up_0.25_8h
ENSG00000215263	Up_0.25_8h
ENSG00000275663	Up_0.25_8h
ENSG00000284704	Up_0.25_8h
ENSG00000199347	Up_0.25_8h
ENSG00000131355	Up_0.25_8h
ENSG00000196826	Up_0.25_8h
ENSG00000259458	Up_0.25_8h
ENSG00000257883	Up_0.25_8h
ENSG00000238933	Up_0.25_8h
ENSG00000223918	Up_0.25_8h
ENSG00000163220	Up_0.25_8h
ENSG00000237137	Up_0.25_8h
ENSG00000248117	Up_0.25_8h
ENSG00000199165	Up_0.25_8h
ENSG00000163884	Up_0.25_8h
ENSG00000260600	Up_0.25_8h
ENSG00000203573	Up_0.25_8h
ENSG00000281120	Up_0.25_8h
ENSG00000261801	Up_0.25_8h
ENSG00000240758	Up_0.25_8h
ENSG00000120210	Up_0.25_8h
ENSG00000274398	Up_0.25_8h
ENSG00000257252	Up_0.25_8h
ENSG00000206998	Up_0.25_8h
ENSG00000267159	Up_0.25_8h
ENSG00000282852	Up_0.25_8h
ENSG00000279128	Up_0.25_8h
ENSG00000283338	Up_0.25_8h
ENSG00000200495	Up_0.25_8h
ENSG00000214039	Up_0.25_8h
ENSG00000189334	Up_0.25_8h
ENSG00000237152	Up_0.25_8h
ENSG00000199454	Up_0.25_8h
ENSG00000257431	Up_0.25_8h
ENSG00000240960	Up_0.25_8h
ENSG00000222017	Up_0.25_8h
ENSG00000249449	Up_0.25_8h
ENSG00000206768	Up_0.25_8h
ENSG00000233683	Up_0.25_8h
ENSG00000270093	Up_0.25_8h
ENSG00000244349	Up_0.25_8h
ENSG00000240631	Up_0.25_8h
ENSG00000278418	Up_0.25_8h
ENSG00000283667	Up_0.25_8h
ENSG00000226142	Up_0.25_8h
ENSG00000259275	Up_0.25_8h
ENSG00000248724	Up_0.25_8h
ENSG00000265043	Up_0.25_8h
ENSG00000258592	Up_0.25_8h
ENSG00000222852	Up_0.25_8h
ENSG00000181856	Up_0.25_8h
ENSG00000170786	Up_0.25_8h
ENSG00000225142	Up_0.25_8h
ENSG00000257277	Up_0.25_8h
ENSG00000183486	Up_0.25_8h
ENSG00000245869	Up_0.25_8h
ENSG00000139970	Up_0.25_8h
ENSG00000255026	Up_0.25_8h
ENSG00000166492	Up_0.25_8h
ENSG00000266977	Up_0.25_8h
ENSG00000269509	Up_0.25_8h
ENSG00000244441	Up_0.25_8h
ENSG00000255253	Up_0.25_8h
ENSG00000165379	Up_0.25_8h
ENSG00000242650	Up_0.25_8h
ENSG00000213232	Up_0.25_8h
ENSG00000259031	Up_0.25_8h
ENSG00000100078	Up_0.25_8h
ENSG00000199646	Up_0.25_8h
ENSG00000237816	Up_0.25_8h
ENSG00000279343	Up_0.25_8h
ENSG00000274594	Up_0.25_8h
ENSG00000112494	Up_0.25_8h
ENSG00000261765	Up_0.25_8h
ENSG00000273558	Up_0.25_8h
ENSG00000276723	Up_0.25_8h
ENSG00000272824	Up_0.25_8h
ENSG00000279304	Up_0.25_8h
ENSG00000162947	Up_0.25_8h
ENSG00000278028	Up_0.25_8h
ENSG00000270664	Up_0.25_8h
ENSG00000226548	Up_0.25_8h
ENSG00000234566	Up_0.25_8h
ENSG00000279637	Up_0.25_8h
ENSG00000120457	Up_0.25_8h
ENSG00000260498	Up_0.25_8h
ENSG00000232848	Up_0.25_8h
ENSG00000201441	Up_0.25_8h
ENSG00000255478	Up_0.25_8h
ENSG00000181616	Up_0.25_8h
ENSG00000278965	Up_0.25_8h
ENSG00000226840	Up_0.25_8h
ENSG00000214860	Up_0.25_8h
ENSG00000213331	Up_0.25_8h
ENSG00000213926	Up_0.25_8h
ENSG00000268643	Up_0.25_8h
ENSG00000165370	Up_0.25_8h
ENSG00000226631	Up_0.25_8h
ENSG00000261046	Up_0.25_8h
ENSG00000141497	Up_0.25_8h
ENSG00000284378	Up_0.25_8h
ENSG00000260963	Up_0.25_8h
ENSG00000197177	Up_0.25_8h
ENSG00000154025	Up_0.25_8h
ENSG00000163219	Up_0.25_8h
ENSG00000207171	Up_0.25_8h
ENSG00000267140	Up_0.25_8h
ENSG00000260518	Up_0.25_8h
ENSG00000252944	Up_0.25_8h
ENSG00000212434	Up_0.25_8h
ENSG00000222439	Up_0.25_8h
ENSG00000144644	Up_0.25_8h
ENSG00000201796	Up_0.25_8h
ENSG00000162267	Up_0.25_8h
ENSG00000244267	Up_0.25_8h
ENSG00000254307	Up_0.25_8h
ENSG00000267013	Up_0.25_8h
ENSG00000264174	Up_0.25_8h
ENSG00000200320	Up_0.25_8h
ENSG00000272075	Up_0.25_8h
ENSG00000215612	Up_0.25_8h
ENSG00000221638	Up_0.25_8h
ENSG00000249503	Up_0.25_8h
ENSG00000236703	Up_0.25_8h
ENSG00000237306	Up_0.25_8h
ENSG00000077713	Up_0.25_8h
ENSG00000260440	Up_0.25_8h
ENSG00000200737	Up_0.25_8h
ENSG00000252456	Up_0.25_8h
ENSG00000236710	Up_0.25_8h
ENSG00000243642	Up_0.25_8h
ENSG00000232277	Up_0.25_8h
ENSG00000159337	Up_0.25_8h
ENSG00000262094	Up_0.25_8h
ENSG00000258791	Up_0.25_8h
ENSG00000182983	Up_0.25_8h
ENSG00000231651	Up_0.25_8h
ENSG00000186479	Up_0.25_8h
ENSG00000230873	Up_0.25_8h
ENSG00000050628	Up_0.25_8h
ENSG00000280431	Up_0.25_8h
ENSG00000102230	Up_0.25_8h
ENSG00000231013	Up_0.25_8h
ENSG00000224706	Up_0.25_8h
ENSG00000241572	Up_0.25_8h
ENSG00000224221	Up_0.25_8h
ENSG00000272634	Up_0.25_8h
ENSG00000273132	Up_0.25_8h
ENSG00000284670	Up_0.25_8h
ENSG00000236445	Up_0.25_8h
ENSG00000176160	Up_0.25_8h
ENSG00000257696	Up_0.25_8h
ENSG00000232079	Up_0.25_8h
ENSG00000276003	Up_0.25_8h
ENSG00000175497	Up_0.25_8h
ENSG00000167945	Up_0.25_8h
ENSG00000180061	Up_0.25_8h
ENSG00000277837	Up_0.25_8h
ENSG00000263264	Up_0.25_8h
ENSG00000186440	Up_0.25_8h
ENSG00000113494	Up_0.25_8h
ENSG00000251278	Up_0.25_8h
ENSG00000176922	Up_0.25_8h
ENSG00000197467	Up_0.25_8h
ENSG00000244738	Up_0.25_8h
ENSG00000166265	Up_0.25_8h
ENSG00000179580	Up_0.25_8h
ENSG00000253555	Up_0.25_8h
ENSG00000264675	Up_0.25_8h
ENSG00000182070	Up_0.25_8h
ENSG00000202059	Up_0.25_8h
ENSG00000230087	Up_0.25_8h
ENSG00000236940	Up_0.25_8h
ENSG00000160284	Up_0.25_8h
ENSG00000179388	Up_0.25_8h
ENSG00000225487	Up_0.25_8h
ENSG00000157613	Up_0.25_8h
ENSG00000261429	Up_0.25_8h
ENSG00000178568	Up_0.25_8h
ENSG00000180934	Up_0.25_8h
ENSG00000228527	Up_0.25_8h
ENSG00000259219	Up_0.25_8h
ENSG00000196289	Up_0.25_8h
ENSG00000159247	Up_0.25_8h
ENSG00000222826	Up_0.25_8h
ENSG00000258456	Up_0.25_8h
ENSG00000256504	Up_0.25_8h
ENSG00000213171	Up_0.25_8h
ENSG00000064218	Up_0.25_8h
ENSG00000250914	Up_0.25_8h
ENSG00000275649	Up_0.25_8h
ENSG00000180913	Up_0.25_8h
ENSG00000183668	Up_0.25_8h
ENSG00000230617	Up_0.25_8h
ENSG00000259933	Up_0.25_8h
ENSG00000196092	Up_0.25_8h
ENSG00000168135	Up_0.25_8h
ENSG00000180043	Up_0.25_8h
ENSG00000238171	Up_0.25_8h
ENSG00000212153	Up_0.25_8h
ENSG00000187166	Up_0.25_8h
ENSG00000251819	Up_0.25_8h
ENSG00000082397	Up_0.25_8h
ENSG00000264105	Up_0.25_8h
ENSG00000250043	Up_0.25_8h
ENSG00000217585	Up_0.25_8h
ENSG00000273972	Up_0.25_8h
ENSG00000204709	Up_0.25_8h
ENSG00000274859	Up_0.25_8h
ENSG00000258104	Up_0.25_8h
ENSG00000266824	Up_0.25_8h
ENSG00000226875	Up_0.25_8h
ENSG00000260302	Up_0.25_8h
ENSG00000260905	Up_0.25_8h
ENSG00000263893	Up_0.25_8h
ENSG00000163888	Up_0.25_8h
ENSG00000163202	Up_0.25_8h
ENSG00000252202	Up_0.25_8h
ENSG00000272911	Up_0.25_8h
ENSG00000251281	Up_0.25_8h
ENSG00000109943	Up_0.25_8h
ENSG00000207369	Up_0.25_8h
ENSG00000228815	Up_0.25_8h
ENSG00000189184	Up_0.25_8h
ENSG00000227999	Up_0.25_8h
ENSG00000145936	Up_0.25_8h
ENSG00000278433	Up_0.25_8h
ENSG00000264934	Up_0.25_8h
ENSG00000035720	Up_0.25_8h
ENSG00000259433	Up_0.25_8h
ENSG00000278847	Up_0.25_8h
ENSG00000242768	Up_0.25_8h
ENSG00000157087	Up_0.25_8h
ENSG00000253773	Up_0.25_8h
ENSG00000248654	Up_0.25_8h
ENSG00000204661	Up_0.25_8h
ENSG00000224469	Up_0.25_8h
ENSG00000188662	Up_0.25_8h
ENSG00000256285	Up_0.25_8h
ENSG00000116544	Up_0.25_8h
ENSG00000283379	Up_0.25_8h
ENSG00000237327	Up_0.25_8h
ENSG00000249493	Up_0.25_8h
ENSG00000274344	Up_0.25_8h
ENSG00000239641	Up_0.25_8h
ENSG00000054219	Up_0.25_8h
ENSG00000214955	Up_0.25_8h
ENSG00000222376	Up_0.25_8h
ENSG00000261049	Up_0.25_8h
ENSG00000267245	Up_0.25_8h
ENSG00000280286	Up_0.25_8h
ENSG00000267707	Up_0.25_8h
ENSG00000249623	Up_0.25_8h
ENSG00000234899	Up_0.25_8h
ENSG00000272884	Up_0.25_8h
ENSG00000130700	Up_0.25_8h
ENSG00000235790	Up_0.25_8h
ENSG00000222005	Up_0.25_8h
ENSG00000253190	Up_0.25_8h
ENSG00000236226	Up_0.25_8h
ENSG00000232179	Up_0.25_8h
ENSG00000167766	Up_0.25_8h
ENSG00000212214	Up_0.25_8h
ENSG00000115423	Up_0.25_8h
ENSG00000214456	Up_0.25_8h
ENSG00000264970	Up_0.25_8h
ENSG00000176951	Up_0.25_8h
ENSG00000228288	Up_0.25_8h
ENSG00000226673	Up_0.25_8h
ENSG00000271236	Up_0.25_8h
ENSG00000254974	Up_0.25_8h
ENSG00000265160	Up_0.25_8h
ENSG00000237422	Up_0.25_8h
ENSG00000188848	Up_0.25_8h
ENSG00000224649	Up_0.25_8h
ENSG00000175287	Up_0.25_8h
ENSG00000259867	Up_0.25_8h
ENSG00000273216	Up_0.25_8h
ENSG00000267328	Up_0.25_8h
ENSG00000123843	Up_0.25_8h
ENSG00000174792	Up_0.25_8h
ENSG00000250541	Up_0.25_8h
ENSG00000224927	Up_0.25_8h
ENSG00000223847	Up_0.25_8h
ENSG00000235052	Up_0.25_8h
ENSG00000280660	Up_0.25_8h
ENSG00000259870	Up_0.25_8h
ENSG00000251656	Up_0.25_8h
ENSG00000254340	Up_0.25_8h
ENSG00000271947	Up_0.25_8h
ENSG00000268536	Up_0.25_8h
ENSG00000171649	Up_0.25_8h
ENSG00000201329	Up_0.25_8h
ENSG00000184867	Up_0.25_8h
ENSG00000234206	Up_0.25_8h
ENSG00000104901	Up_0.25_8h
ENSG00000257271	Up_0.25_8h
ENSG00000245667	Up_0.25_8h
ENSG00000170579	Up_0.25_8h
ENSG00000189068	Up_0.25_8h
ENSG00000267463	Up_0.25_8h
ENSG00000232301	Up_0.25_8h
ENSG00000198326	Up_0.25_8h
ENSG00000178776	Up_0.25_8h
ENSG00000234134	Up_0.25_8h
ENSG00000235385	Up_0.25_8h
ENSG00000199530	Up_0.25_8h
ENSG00000262966	Up_0.25_8h
ENSG00000257921	Up_0.25_8h
ENSG00000278346	Up_0.25_8h
ENSG00000267212	Up_0.25_8h
ENSG00000227911	Up_0.25_8h
ENSG00000254924	Up_0.25_8h
ENSG00000256195	Up_0.25_8h
ENSG00000010810	Up_0.25_8h
ENSG00000115607	Up_0.25_8h
ENSG00000188660	Up_0.25_8h
ENSG00000272319	Up_0.25_8h
ENSG00000167914	Up_0.25_8h
ENSG00000229326	Up_0.25_8h
ENSG00000228948	Up_0.25_8h
ENSG00000205056	Up_0.25_8h
ENSG00000258086	Up_0.25_8h
ENSG00000259468	Up_0.25_8h
ENSG00000232998	Up_0.25_8h
ENSG00000199570	Up_0.25_8h
ENSG00000225766	Up_0.25_8h
ENSG00000232117	Up_0.25_8h
ENSG00000183918	Up_0.25_8h
ENSG00000068831	Up_0.25_8h
ENSG00000279012	Up_0.25_8h
ENSG00000246575	Up_0.25_8h
ENSG00000189275	Up_0.25_8h
ENSG00000259125	Up_0.25_8h
ENSG00000270024	Up_0.25_8h
ENSG00000134343	Up_0.25_8h
ENSG00000260072	Up_0.25_8h
ENSG00000232374	Up_0.25_8h
ENSG00000259637	Up_0.25_8h
ENSG00000229918	Up_0.25_8h
ENSG00000238260	Up_0.25_8h
ENSG00000224389	Up_0.25_8h
ENSG00000279609	Up_0.25_8h
ENSG00000248871	Up_0.25_8h
ENSG00000277214	Up_0.25_8h
ENSG00000237501	Up_0.25_8h
ENSG00000259905	Up_0.25_8h
ENSG00000243137	Up_0.25_8h
ENSG00000261437	Up_0.25_8h
ENSG00000234323	Up_0.25_8h
ENSG00000267262	Up_0.25_8h
ENSG00000245112	Up_0.25_8h
ENSG00000269883	Up_0.25_8h
ENSG00000237074	Up_0.25_8h
ENSG00000087589	Up_0.25_8h
ENSG00000273855	Up_0.25_8h
ENSG00000214357	Up_0.25_8h
ENSG00000257880	Up_0.25_8h
ENSG00000183662	Up_0.25_8h
ENSG00000251279	Up_0.25_8h
ENSG00000237166	Up_0.25_8h
ENSG00000221813	Up_0.25_8h
ENSG00000251320	Up_0.25_8h
ENSG00000218690	Up_0.25_8h
ENSG00000278572	Up_0.25_8h
ENSG00000202502	Up_0.25_8h
ENSG00000274934	Up_0.25_8h
ENSG00000207118	Up_0.25_8h
ENSG00000264834	Up_0.25_8h
ENSG00000184611	Up_0.25_8h
ENSG00000078725	Up_0.25_8h
ENSG00000237693	Up_0.25_8h
ENSG00000257569	Up_0.25_8h
ENSG00000119919	Up_0.25_8h
ENSG00000186687	Up_0.25_8h
ENSG00000272146	Up_0.25_8h
ENSG00000250509	Up_0.25_8h
ENSG00000271858	Up_0.25_8h
ENSG00000226441	Up_0.25_8h
ENSG00000239316	Up_0.25_8h
ENSG00000171724	Up_0.25_8h
ENSG00000261356	Up_0.25_8h
ENSG00000259271	Up_0.25_8h
ENSG00000170044	Up_0.25_8h
ENSG00000240847	Up_0.25_8h
ENSG00000263914	Up_0.25_8h
ENSG00000236024	Up_0.25_8h
ENSG00000102349	Up_0.25_8h
ENSG00000221753	Up_0.25_8h
ENSG00000084734	Up_0.25_8h
ENSG00000163736	Up_0.25_8h
ENSG00000208023	Up_0.25_8h
ENSG00000269271	Up_0.25_8h
ENSG00000228664	Up_0.25_8h
ENSG00000229827	Up_0.25_8h
ENSG00000139220	Up_0.25_8h
ENSG00000250584	Up_0.25_8h
ENSG00000263595	Up_0.25_8h
ENSG00000250972	Up_0.25_8h
ENSG00000201635	Up_0.25_8h
ENSG00000243417	Up_0.25_8h
ENSG00000258654	Up_0.25_8h
ENSG00000081051	Up_0.25_8h
ENSG00000234699	Up_0.25_8h
ENSG00000255057	Up_0.25_8h
ENSG00000183747	Up_0.25_8h
ENSG00000239595	Up_0.25_8h
ENSG00000275371	Up_0.25_8h
ENSG00000256734	Up_0.25_8h
ENSG00000165807	Up_0.25_8h
ENSG00000249192	Up_0.25_8h
ENSG00000229687	Up_0.25_8h
ENSG00000166927	Up_0.25_8h
ENSG00000267581	Up_0.25_8h
ENSG00000283327	Up_0.25_8h
ENSG00000273377	Up_0.25_8h
ENSG00000147570	Up_0.25_8h
ENSG00000109991	Up_0.25_8h
ENSG00000213085	Up_0.25_8h
ENSG00000233464	Up_0.25_8h
ENSG00000281156	Up_0.25_8h
ENSG00000225025	Up_0.25_8h
ENSG00000261272	Up_0.25_8h
ENSG00000263556	Up_0.25_8h
ENSG00000283654	Up_0.25_8h
ENSG00000258643	Up_0.25_8h
ENSG00000258907	Up_0.25_8h
ENSG00000249418	Up_0.25_8h
ENSG00000264990	Up_0.25_8h
ENSG00000284292	Up_0.25_8h
ENSG00000267001	Up_0.25_8h
ENSG00000272372	Up_0.25_8h
ENSG00000243548	Up_0.25_8h
ENSG00000234283	Up_0.25_8h
ENSG00000218020	Up_0.25_8h
ENSG00000148357	Up_0.25_8h
ENSG00000163492	Up_0.25_8h
ENSG00000238107	Up_0.25_8h
ENSG00000254634	Up_0.25_8h
ENSG00000272827	Up_0.25_8h
ENSG00000260541	Up_0.25_8h
ENSG00000272848	Up_0.25_8h
ENSG00000255546	Up_0.25_8h
ENSG00000203395	Up_0.25_8h
ENSG00000230174	Up_0.25_8h
ENSG00000175489	Up_0.25_8h
ENSG00000267058	Up_0.25_8h
ENSG00000258256	Up_0.25_8h
ENSG00000280890	Up_0.25_8h
ENSG00000250505	Up_0.25_8h
ENSG00000272397	Up_0.25_8h
ENSG00000284413	Up_0.25_8h
ENSG00000231957	Up_0.25_8h
ENSG00000237222	Up_0.25_8h
ENSG00000200406	Up_0.25_8h
ENSG00000270430	Up_0.25_8h
ENSG00000271803	Up_0.25_8h
ENSG00000158077	Up_0.25_8h
ENSG00000244459	Up_0.25_8h
ENSG00000234611	Up_0.25_8h
ENSG00000196796	Up_0.25_8h
ENSG00000228151	Up_0.25_8h
ENSG00000243991	Up_0.25_8h
ENSG00000121904	Up_0.25_8h
ENSG00000182885	Up_0.25_8h
ENSG00000203496	Up_0.25_8h
ENSG00000266120	Up_0.25_8h
ENSG00000213981	Up_0.25_8h
ENSG00000258878	Up_0.25_8h
ENSG00000235772	Up_0.25_8h
ENSG00000267550	Up_0.25_8h
ENSG00000233183	Up_0.25_8h
ENSG00000129170	Up_0.25_8h
ENSG00000264823	Up_0.25_8h
ENSG00000231718	Up_0.25_8h
ENSG00000136267	Up_0.25_8h
ENSG00000256953	Up_0.25_8h
ENSG00000235426	Up_0.25_8h
ENSG00000241997	Up_0.25_8h
ENSG00000229104	Up_0.25_8h
ENSG00000243173	Up_0.25_8h
ENSG00000244003	Up_0.25_8h
ENSG00000103472	Up_0.25_8h
ENSG00000232896	Up_0.25_8h
ENSG00000137843	Up_0.25_8h
ENSG00000265089	Up_0.25_8h
ENSG00000282034	Up_0.25_8h
ENSG00000222650	Up_0.25_8h
ENSG00000149573	Up_0.25_8h
ENSG00000205863	Up_0.25_8h
ENSG00000196872	Up_0.25_8h
ENSG00000196570	Up_0.25_8h
ENSG00000234630	Up_0.25_8h
ENSG00000218976	Up_0.25_8h
ENSG00000252928	Up_0.25_8h
ENSG00000239510	Up_0.25_8h
ENSG00000222371	Up_0.25_8h
ENSG00000176040	Up_0.25_8h
ENSG00000271166	Up_0.25_8h
ENSG00000240874	Up_0.25_8h
ENSG00000265606	Up_0.25_8h
ENSG00000243738	Up_0.25_8h
ENSG00000254057	Up_0.25_8h
ENSG00000226904	Up_0.25_8h
ENSG00000256262	Up_0.25_8h
ENSG00000217746	Up_0.25_8h
ENSG00000258815	Up_0.25_8h
ENSG00000236521	Up_0.25_8h
ENSG00000227245	Up_0.25_8h
ENSG00000221445	Up_0.25_8h
ENSG00000134323	Up_0.25_8h
ENSG00000200492	Up_0.25_8h
ENSG00000205333	Up_0.25_8h
ENSG00000206013	Up_0.25_8h
ENSG00000204011	Up_0.25_8h
ENSG00000255384	Up_0.25_8h
ENSG00000233817	Up_0.25_8h
ENSG00000248133	Up_0.25_8h
ENSG00000240116	Up_0.25_8h
ENSG00000213973	Up_0.25_8h
ENSG00000224409	Up_0.25_8h
ENSG00000206865	Up_0.25_8h
ENSG00000232382	Up_0.25_8h
ENSG00000225511	Up_0.25_8h
ENSG00000161992	Up_0.25_8h
ENSG00000180803	Up_0.25_8h
ENSG00000255145	Up_0.25_8h
ENSG00000254396	Up_0.25_8h
ENSG00000279726	Up_0.25_8h
ENSG00000180549	Up_0.25_8h
ENSG00000180090	Up_0.25_8h
ENSG00000140279	Up_0.25_8h
ENSG00000186676	Up_0.25_8h
ENSG00000277448	Up_0.25_8h
ENSG00000212899	Up_0.25_8h
ENSG00000277051	Up_0.25_8h
ENSG00000249141	Up_0.25_8h
ENSG00000244502	Up_0.25_8h
ENSG00000200605	Up_0.25_8h
ENSG00000269091	Up_0.25_8h
ENSG00000273584	Up_0.25_8h
ENSG00000242948	Up_0.25_8h
ENSG00000250662	Up_0.25_8h
ENSG00000255847	Up_0.25_8h
ENSG00000254738	Up_0.25_8h
ENSG00000230162	Up_0.25_8h
ENSG00000268938	Up_0.25_8h
ENSG00000256029	Up_0.25_8h
ENSG00000254650	Up_0.25_8h
ENSG00000221867	Up_0.25_8h
ENSG00000272729	Up_0.25_8h
ENSG00000271434	Up_0.25_8h
ENSG00000268818	Up_0.25_8h
ENSG00000225767	Up_0.25_8h
ENSG00000018607	Up_0.25_8h
ENSG00000132259	Up_0.25_8h
ENSG00000248279	Up_0.25_8h
ENSG00000166143	Up_0.25_8h
ENSG00000279848	Up_0.25_8h
ENSG00000121377	Up_0.25_8h
ENSG00000146755	Up_0.25_8h
ENSG00000234936	Up_0.25_8h
ENSG00000105219	Up_0.25_8h
ENSG00000275900	Up_0.25_8h
ENSG00000240502	Up_0.25_8h
ENSG00000243601	Up_0.25_8h
ENSG00000154764	Up_0.25_8h
ENSG00000178821	Up_0.25_8h
ENSG00000228411	Up_0.25_8h
ENSG00000231346	Up_0.25_8h
ENSG00000265489	Up_0.25_8h
ENSG00000256403	Up_0.25_8h
ENSG00000254781	Up_0.25_8h
ENSG00000260616	Up_0.25_8h
ENSG00000267231	Up_0.25_8h
ENSG00000272589	Up_0.25_8h
ENSG00000276027	Up_0.25_8h
ENSG00000267372	Up_0.25_8h
ENSG00000280053	Up_0.25_8h
ENSG00000206762	Up_0.25_8h
ENSG00000234199	Up_0.25_8h
ENSG00000129221	Up_0.25_8h
ENSG00000131379	Up_0.25_8h
ENSG00000228862	Up_0.25_8h
ENSG00000277247	Up_0.25_8h
ENSG00000272282	Up_0.25_8h
ENSG00000230417	Up_0.25_8h
ENSG00000233623	Up_0.25_8h
ENSG00000244006	Up_0.25_8h
ENSG00000259823	Up_0.25_8h
ENSG00000102854	Up_0.25_8h
ENSG00000075043	Up_0.25_8h
ENSG00000259828	Up_0.25_8h
ENSG00000255946	Up_0.25_8h
ENSG00000248735	Up_0.25_8h
ENSG00000255459	Up_0.25_8h
ENSG00000124196	Up_0.25_8h
ENSG00000242989	Up_0.25_8h
ENSG00000271185	Up_0.25_8h
ENSG00000149968	Up_0.25_8h
ENSG00000167083	Up_0.25_8h
ENSG00000234044	Up_0.25_8h
ENSG00000188227	Up_0.25_8h
ENSG00000259182	Up_0.25_8h
ENSG00000228204	Up_0.25_8h
ENSG00000186265	Up_0.25_8h
ENSG00000234772	Up_0.25_8h
ENSG00000234016	Up_0.25_8h
ENSG00000271164	Up_0.25_8h
ENSG00000256673	Up_0.25_8h
ENSG00000253022	Up_0.25_8h
ENSG00000243374	Up_0.25_8h
ENSG00000258926	Up_0.25_8h
ENSG00000159708	Up_0.25_8h
ENSG00000186710	Up_0.25_8h
ENSG00000252214	Up_0.25_8h
ENSG00000257754	Up_0.25_8h
ENSG00000261325	Up_0.25_8h
ENSG00000255256	Up_0.25_8h
ENSG00000144218	Up_0.25_8h
ENSG00000253418	Up_0.25_8h
ENSG00000276765	Up_0.25_8h
ENSG00000148408	Up_0.25_8h
ENSG00000229228	Up_0.25_8h
ENSG00000215853	Up_0.25_8h
ENSG00000163520	Up_0.25_8h
ENSG00000242657	Up_0.25_8h
ENSG00000275965	Up_0.25_8h
ENSG00000251396	Up_0.25_8h
ENSG00000112462	Up_0.25_8h
ENSG00000274286	Up_0.25_8h
ENSG00000257359	Up_0.25_8h
ENSG00000170627	Up_0.25_8h
ENSG00000258628	Up_0.25_8h
ENSG00000272573	Up_0.25_8h
ENSG00000243980	Up_0.25_8h
ENSG00000259227	Up_0.25_8h
ENSG00000257202	Up_0.25_8h
ENSG00000235818	Up_0.25_8h
ENSG00000267026	Up_0.25_8h
ENSG00000124260	Up_0.25_8h
ENSG00000252139	Up_0.25_8h
ENSG00000069712	Up_0.25_8h
ENSG00000242560	Up_0.25_8h
ENSG00000158050	Up_0.25_8h
ENSG00000228016	Up_0.25_8h
ENSG00000231233	Up_0.25_8h
ENSG00000235035	Up_0.25_8h
ENSG00000272414	Up_0.25_8h
ENSG00000186431	Up_0.25_8h
ENSG00000225752	Up_0.25_8h
ENSG00000230240	Up_0.25_8h
ENSG00000216713	Up_0.25_8h
ENSG00000232474	Up_0.25_8h
ENSG00000239580	Up_0.25_8h
ENSG00000214102	Up_0.25_8h
ENSG00000189127	Up_0.25_8h
ENSG00000237252	Up_0.25_8h
ENSG00000273674	Up_0.25_8h
ENSG00000104369	Up_0.25_8h
ENSG00000257829	Up_0.25_8h
ENSG00000128683	Up_0.25_8h
ENSG00000267269	Up_0.25_8h
ENSG00000229294	Up_0.25_8h
ENSG00000198633	Up_0.25_8h
ENSG00000260979	Up_0.25_8h
ENSG00000270933	Up_0.25_8h
ENSG00000254236	Up_0.25_8h
ENSG00000242180	Up_0.25_8h
ENSG00000149633	Up_0.25_8h
ENSG00000138675	Up_0.25_8h
ENSG00000148680	Up_0.25_8h
ENSG00000254486	Up_0.25_8h
ENSG00000231329	Up_0.25_8h
ENSG00000225189	Up_0.25_8h
ENSG00000267992	Up_0.25_8h
ENSG00000275672	Up_0.25_8h
ENSG00000261611	Up_0.25_8h
ENSG00000254771	Up_0.25_8h
ENSG00000257191	Up_0.25_8h
ENSG00000142405	Up_0.25_8h
ENSG00000235129	Up_0.25_8h
ENSG00000172349	Up_0.25_8h
ENSG00000260029	Up_0.25_8h
ENSG00000273587	Up_0.25_8h
ENSG00000174697	Up_0.25_8h
ENSG00000251476	Up_0.25_8h
ENSG00000279677	Up_0.25_8h
ENSG00000228238	Up_0.25_8h
ENSG00000281692	Up_0.25_8h
ENSG00000283125	Up_0.25_8h
ENSG00000248553	Up_0.25_8h
ENSG00000255400	Up_0.25_8h
ENSG00000244586	Up_0.25_8h
ENSG00000250327	Up_0.25_8h
ENSG00000199470	Up_0.25_8h
ENSG00000223656	Up_0.25_8h
ENSG00000235590	Up_0.25_8h
ENSG00000254788	Up_0.25_8h
ENSG00000271880	Up_0.25_8h
ENSG00000223584	Up_0.25_8h
ENSG00000102760	Up_0.25_8h
ENSG00000199509	Up_0.25_8h
ENSG00000269431	Up_0.25_8h
ENSG00000281128	Up_0.25_8h
ENSG00000199458	Up_0.25_8h
ENSG00000124721	Up_0.25_8h
ENSG00000108878	Up_0.25_8h
ENSG00000280147	Up_0.25_8h
ENSG00000225836	Up_0.25_8h
ENSG00000261294	Up_0.25_8h
ENSG00000138741	Up_0.25_8h
ENSG00000260395	Up_0.25_8h
ENSG00000225535	Up_0.25_8h
ENSG00000248554	Up_0.25_8h
ENSG00000248722	Up_0.25_8h
ENSG00000267345	Up_0.25_8h
ENSG00000128422	Up_0.25_8h
ENSG00000117122	Up_0.25_8h
ENSG00000236296	Up_0.25_8h
ENSG00000230484	Up_0.25_8h
ENSG00000261832	Up_0.25_8h
ENSG00000277893	Up_0.25_8h
ENSG00000242578	Up_0.25_8h
ENSG00000130711	Up_0.25_8h
ENSG00000235014	Up_0.25_8h
ENSG00000120937	Up_0.25_8h
ENSG00000112559	Up_0.25_8h
ENSG00000233129	Up_0.25_8h
ENSG00000275800	Up_0.25_8h
ENSG00000109255	Up_0.25_8h
ENSG00000260342	Up_0.25_8h
ENSG00000157766	Up_0.25_8h
ENSG00000228740	Up_0.25_8h
ENSG00000253544	Up_0.25_8h
ENSG00000135097	Up_0.25_8h
ENSG00000250889	Up_0.25_8h
ENSG00000231621	Up_0.25_8h
ENSG00000279324	Up_0.25_8h
ENSG00000274376	Up_0.25_8h
ENSG00000265282	Up_0.25_8h
ENSG00000271461	Up_0.25_8h
ENSG00000279878	Up_0.25_8h
ENSG00000221052	Up_0.25_8h
ENSG00000113946	Up_0.25_8h
ENSG00000253661	Up_0.25_8h
ENSG00000264859	Up_0.25_8h
ENSG00000228577	Up_0.25_8h
ENSG00000133246	Up_0.25_8h
ENSG00000215218	Up_0.25_8h
ENSG00000232292	Up_0.25_8h
ENSG00000227032	Up_0.25_8h
ENSG00000078295	Up_0.25_8h
ENSG00000197937	Up_0.25_8h
ENSG00000119915	Up_0.25_8h
ENSG00000221923	Up_0.25_8h
ENSG00000258454	Up_0.25_8h
ENSG00000263641	Up_0.25_8h
ENSG00000230084	Up_0.25_8h
ENSG00000278449	Up_0.25_8h
ENSG00000223677	Up_0.25_8h
ENSG00000227279	Up_0.25_8h
ENSG00000214825	Up_0.25_8h
ENSG00000278892	Up_0.25_8h
ENSG00000239722	Up_0.25_8h
ENSG00000230208	Up_0.25_8h
ENSG00000227066	Up_0.25_8h
ENSG00000239480	Up_0.25_8h
ENSG00000283237	Up_0.25_8h
ENSG00000124467	Up_0.25_8h
ENSG00000229544	Up_0.25_8h
ENSG00000254664	Up_0.25_8h
ENSG00000250519	Up_0.25_8h
ENSG00000231877	Up_0.25_8h
ENSG00000207771	Up_0.25_8h
ENSG00000248416	Up_0.25_8h
ENSG00000200227	Up_0.25_8h
ENSG00000224001	Up_0.25_8h
ENSG00000258262	Up_0.25_8h
ENSG00000196569	Up_0.25_8h
ENSG00000160801	Up_0.25_8h
ENSG00000207105	Up_0.25_8h
ENSG00000236668	Up_0.25_8h
ENSG00000103522	Up_0.25_8h
ENSG00000174498	Up_0.25_8h
ENSG00000260738	Up_0.25_8h
ENSG00000225497	Up_0.25_8h
ENSG00000237617	Up_0.25_8h
ENSG00000237740	Up_0.25_8h
ENSG00000267571	Up_0.25_8h
ENSG00000180644	Up_0.25_8h
ENSG00000144285	Up_0.25_8h
ENSG00000231512	Up_0.25_8h
ENSG00000250410	Up_0.25_8h
ENSG00000244436	Up_0.25_8h
ENSG00000136514	Up_0.25_8h
ENSG00000244632	Up_0.25_8h
ENSG00000279220	Up_0.25_8h
ENSG00000284612	Up_0.25_8h
ENSG00000200629	Up_0.25_8h
ENSG00000207136	Up_0.25_8h
ENSG00000228166	Up_0.25_8h
ENSG00000258459	Up_0.25_8h
ENSG00000235631	Up_0.25_8h
ENSG00000176165	Up_0.25_8h
ENSG00000256249	Up_0.25_8h
ENSG00000102924	Up_0.25_8h
ENSG00000101958	Up_0.25_8h
ENSG00000229505	Up_0.25_8h
ENSG00000169436	Up_0.25_8h
ENSG00000222007	Up_0.25_8h
ENSG00000275846	Up_0.25_8h
ENSG00000127329	Up_0.25_8h
ENSG00000260249	Up_0.25_8h
ENSG00000206796	Up_0.25_8h
ENSG00000251788	Up_0.25_8h
ENSG00000261095	Up_0.25_8h
ENSG00000149256	Up_0.25_8h
ENSG00000280134	Up_0.25_8h
ENSG00000251128	Up_0.25_8h
ENSG00000260185	Up_0.25_8h
ENSG00000229674	Up_0.25_8h
ENSG00000232977	Up_0.25_8h
ENSG00000120242	Up_0.25_8h
ENSG00000163283	Up_0.25_8h
ENSG00000175841	Up_0.25_8h
ENSG00000254700	Up_0.25_8h
ENSG00000267254	Up_0.25_8h
ENSG00000262160	Up_0.25_8h
ENSG00000269540	Up_0.25_8h
ENSG00000283268	Up_0.25_8h
ENSG00000197213	Up_0.25_8h
ENSG00000225251	Up_0.25_8h
ENSG00000162873	Up_0.25_8h
ENSG00000281731	Up_0.25_8h
ENSG00000250579	Up_0.25_8h
ENSG00000264316	Up_0.25_8h
ENSG00000264585	Up_0.25_8h
ENSG00000269119	Up_0.25_8h
ENSG00000252480	Up_0.25_8h
ENSG00000254016	Up_0.25_8h
ENSG00000275529	Up_0.25_8h
ENSG00000200630	Up_0.25_8h
ENSG00000212122	Up_0.25_8h
ENSG00000139292	Up_0.25_8h
ENSG00000266941	Up_0.25_8h
ENSG00000249138	Up_0.25_8h
ENSG00000269693	Up_0.25_8h
ENSG00000258535	Up_0.25_8h
ENSG00000249295	Up_0.25_8h
ENSG00000175707	Up_0.25_8h
ENSG00000250020	Up_0.25_8h
ENSG00000214161	Up_0.25_8h
ENSG00000226329	Up_0.25_8h
ENSG00000260777	Up_0.25_8h
ENSG00000260144	Up_0.25_8h
ENSG00000071242	Up_0.25_8h
ENSG00000251173	Up_0.25_8h
ENSG00000205578	Up_0.25_8h
ENSG00000253668	Up_0.25_8h
ENSG00000249375	Up_0.25_8h
ENSG00000243607	Up_0.25_8h
ENSG00000255319	Up_0.25_8h
ENSG00000120262	Up_0.25_8h
ENSG00000283189	Up_0.25_8h
ENSG00000263107	Up_0.25_8h
ENSG00000105679	Up_0.25_8h
ENSG00000260772	Up_0.25_8h
ENSG00000215837	Up_0.25_8h
ENSG00000214447	Up_0.25_8h
ENSG00000273301	Up_0.25_8h
ENSG00000264941	Up_0.25_8h
ENSG00000275001	Up_0.25_8h
ENSG00000223576	Up_0.25_8h
ENSG00000231134	Up_0.25_8h
ENSG00000273160	Up_0.25_8h
ENSG00000214305	Up_0.25_8h
ENSG00000233705	Up_0.25_8h
ENSG00000227659	Up_0.25_8h
ENSG00000187808	Up_0.25_8h
ENSG00000165935	Up_0.25_8h
ENSG00000185040	Up_0.25_8h
ENSG00000279981	Up_0.25_8h
ENSG00000223884	Up_0.25_8h
ENSG00000235280	Up_0.25_8h
ENSG00000183813	Up_0.25_8h
ENSG00000260238	Up_0.25_8h
ENSG00000126259	Up_0.25_8h
ENSG00000197617	Up_0.25_8h
ENSG00000279286	Up_0.25_8h
ENSG00000278073	Up_0.25_8h
ENSG00000121101	Up_0.25_8h
ENSG00000228748	Up_0.25_8h
ENSG00000264019	Up_0.25_8h
ENSG00000121905	Up_0.25_8h
ENSG00000161405	Up_0.25_8h
ENSG00000241082	Up_0.25_8h
ENSG00000279590	Up_0.25_8h
ENSG00000233098	Up_0.25_8h
ENSG00000172733	Up_0.25_8h
ENSG00000279674	Up_0.25_8h
ENSG00000221230	Up_0.25_8h
ENSG00000236616	Up_0.25_8h
ENSG00000179840	Up_0.25_8h
ENSG00000267084	Up_0.25_8h
ENSG00000248472	Up_0.25_8h
ENSG00000226209	Up_0.25_8h
ENSG00000249188	Up_0.25_8h
ENSG00000275981	Up_0.25_8h
ENSG00000228037	Up_0.25_8h
ENSG00000222488	Up_0.25_8h
ENSG00000199069	Up_0.25_8h
ENSG00000240426	Up_0.25_8h
ENSG00000261534	Up_0.25_8h
ENSG00000091513	Up_0.25_8h
ENSG00000249590	Up_0.25_8h
ENSG00000262362	Up_0.25_8h
ENSG00000281538	Up_0.25_8h
ENSG00000249407	Up_0.25_8h
ENSG00000213927	Up_0.25_8h
ENSG00000251563	Up_0.25_8h
ENSG00000226580	Up_0.25_8h
ENSG00000278222	Up_0.25_8h
ENSG00000201867	Up_0.25_8h
ENSG00000242324	Up_0.25_8h
ENSG00000277269	Up_0.25_8h
ENSG00000165694	Up_0.25_8h
ENSG00000204659	Up_0.25_8h
ENSG00000235214	Up_0.25_8h
ENSG00000223247	Up_0.25_8h
ENSG00000237139	Up_0.25_8h
ENSG00000249158	Up_0.25_8h
ENSG00000196711	Up_0.25_8h
ENSG00000257838	Up_0.25_8h
ENSG00000213150	Up_0.25_8h
ENSG00000271440	Up_0.25_8h
ENSG00000249635	Up_0.25_8h
ENSG00000253054	Up_0.25_8h
ENSG00000162367	Up_0.25_8h
ENSG00000277512	Up_0.25_8h
ENSG00000175746	Up_0.25_8h
ENSG00000260282	Up_0.25_8h
ENSG00000259171	Up_0.25_8h
ENSG00000176746	Up_0.25_8h
ENSG00000230530	Up_0.25_8h
ENSG00000279160	Up_0.25_8h
ENSG00000160862	Up_0.25_8h
ENSG00000244300	Up_0.25_8h
ENSG00000273721	Up_0.25_8h
ENSG00000253006	Up_0.25_8h
ENSG00000162896	Up_0.25_8h
ENSG00000213057	Up_0.25_8h
ENSG00000230570	Up_0.25_8h
ENSG00000201448	Up_0.25_8h
ENSG00000198520	Up_0.25_8h
ENSG00000184599	Up_0.25_8h
ENSG00000166831	Up_0.25_8h
ENSG00000224066	Up_0.25_8h
ENSG00000123612	Up_0.25_8h
ENSG00000239281	Up_0.25_8h
ENSG00000111704	Up_0.25_8h
ENSG00000272942	Up_0.25_8h
ENSG00000207186	Up_0.25_8h
ENSG00000164256	Up_0.25_8h
ENSG00000235924	Up_0.25_8h
ENSG00000180834	Up_0.25_8h
ENSG00000196189	Up_0.25_8h
ENSG00000261996	Up_0.25_8h
ENSG00000241866	Up_0.25_8h
ENSG00000271981	Up_0.25_8h
ENSG00000186912	Up_0.25_8h
ENSG00000267743	Up_0.25_8h
ENSG00000279370	Up_0.25_8h
ENSG00000175899	Up_0.25_8h
ENSG00000256995	Up_0.25_8h
ENSG00000164116	Up_0.25_8h
ENSG00000267690	Up_0.25_8h
ENSG00000228614	Up_0.25_8h
ENSG00000223683	Up_0.25_8h
ENSG00000180432	Up_0.25_8h
ENSG00000262481	Up_0.25_8h
ENSG00000226877	Up_0.25_8h
ENSG00000280354	Up_0.25_8h
ENSG00000228882	Up_0.25_8h
ENSG00000281883	Up_0.25_8h
ENSG00000199605	Up_0.25_8h
ENSG00000263938	Up_0.25_8h
ENSG00000249675	Up_0.25_8h
ENSG00000229091	Up_0.25_8h
ENSG00000264101	Up_0.25_8h
ENSG00000279855	Up_0.25_8h
ENSG00000278863	Up_0.25_8h
ENSG00000226806	Up_0.25_8h
ENSG00000230914	Up_0.25_8h
ENSG00000259700	Up_0.25_8h
ENSG00000272578	Up_0.25_8h
ENSG00000229299	Up_0.25_8h
ENSG00000248254	Up_0.25_8h
ENSG00000265743	Up_0.25_8h
ENSG00000238256	Up_0.25_8h
ENSG00000260895	Up_0.25_8h
ENSG00000270405	Up_0.25_8h
ENSG00000221643	Up_0.25_8h
ENSG00000260281	Up_0.25_8h
ENSG00000268262	Up_0.25_8h
ENSG00000250748	Up_0.25_8h
ENSG00000183034	Up_0.25_8h
ENSG00000172139	Up_0.25_8h
ENSG00000239253	Up_0.25_8h
ENSG00000257078	Up_0.25_8h
ENSG00000252487	Up_0.25_8h
ENSG00000170807	Up_0.25_8h
ENSG00000258984	Up_0.25_8h
ENSG00000157782	Up_0.25_8h
ENSG00000254622	Up_0.25_8h
ENSG00000175161	Up_0.25_8h
ENSG00000254855	Up_0.25_8h
ENSG00000250260	Up_0.25_8h
ENSG00000249096	Up_0.25_8h
ENSG00000261043	Up_0.25_8h
ENSG00000115297	Up_0.25_8h
ENSG00000257108	Up_0.25_8h
ENSG00000269226	Up_0.25_8h
ENSG00000203356	Up_0.25_8h
ENSG00000235994	Up_0.25_8h
ENSG00000271787	Up_0.25_8h
ENSG00000227300	Up_0.25_8h
ENSG00000283023	Up_0.25_8h
ENSG00000199032	Up_0.25_8h
ENSG00000201583	Up_0.25_8h
ENSG00000165091	Up_0.25_8h
ENSG00000224441	Up_0.25_8h
ENSG00000203740	Up_0.25_8h
ENSG00000241439	Up_0.25_8h
ENSG00000113578	Up_0.25_8h
ENSG00000228484	Up_0.25_8h
ENSG00000143627	Up_0.25_8h
ENSG00000230524	Up_0.25_8h
ENSG00000249896	Up_0.25_8h
ENSG00000100399	Up_0.25_8h
ENSG00000185028	Up_0.25_8h
ENSG00000135477	Up_0.25_8h
ENSG00000254192	Up_0.25_8h
ENSG00000167178	Up_0.25_8h
ENSG00000239435	Up_0.25_8h
ENSG00000235545	Up_0.25_8h
ENSG00000205959	Up_0.25_8h
ENSG00000202361	Up_0.25_8h
ENSG00000236871	Up_0.25_8h
ENSG00000225652	Up_0.25_8h
ENSG00000261175	Up_0.25_8h
ENSG00000283683	Up_0.25_8h
ENSG00000203663	Up_0.25_8h
ENSG00000225385	Up_0.25_8h
ENSG00000223489	Up_0.25_8h
ENSG00000277698	Up_0.25_8h
ENSG00000199938	Up_0.25_8h
ENSG00000266059	Up_0.25_8h
ENSG00000164385	Up_0.25_8h
ENSG00000227832	Up_0.25_8h
ENSG00000283317	Up_0.25_8h
ENSG00000137270	Up_0.25_8h
ENSG00000205978	Up_0.25_8h
ENSG00000224289	Up_0.25_8h
ENSG00000207696	Up_0.25_8h
ENSG00000249846	Up_0.25_8h
ENSG00000252839	Up_0.25_8h
ENSG00000240591	Up_0.25_8h
ENSG00000269807	Up_0.25_8h
ENSG00000284194	Up_0.25_8h
ENSG00000105538	Up_0.25_8h
ENSG00000279061	Up_0.25_8h
ENSG00000215005	Up_0.25_8h
ENSG00000177374	Up_0.25_8h
ENSG00000199667	Up_0.25_8h
ENSG00000280164	Up_0.25_8h
ENSG00000278990	Up_0.25_8h
ENSG00000241052	Up_0.25_8h
ENSG00000234224	Up_0.25_8h
ENSG00000271680	Up_0.25_8h
ENSG00000134249	Up_0.25_8h
ENSG00000266100	Up_0.25_8h
ENSG00000198787	Up_0.25_8h
ENSG00000241188	Up_0.25_8h
ENSG00000206910	Up_0.25_8h
ENSG00000259083	Up_0.25_8h
[truncated: 7,901 more rows]

## Sheet: A_VennDiagramResults
Names	total	elements
Up 0.25_24h Up 0.25_8h Up 0.5_24h Up 0.5_8h	99	ENSG00000273674
		ENSG00000104369
		ENSG00000257829
		ENSG00000128683
		ENSG00000267269
		ENSG00000229294
		ENSG00000198633
		ENSG00000260979
		ENSG00000270933
		ENSG00000254236
		ENSG00000242180
		ENSG00000149633
		ENSG00000138675
		ENSG00000148680
		ENSG00000254486
		ENSG00000231329
		ENSG00000225189
		ENSG00000267992
		ENSG00000275672
		ENSG00000261611
		ENSG00000254771
		ENSG00000257191
		ENSG00000142405
		ENSG00000235129
		ENSG00000172349
		ENSG00000260029
		ENSG00000273587
		ENSG00000174697
		ENSG00000251476
		ENSG00000279677
		ENSG00000228238
		ENSG00000281692
		ENSG00000283125
		ENSG00000248553
		ENSG00000255400
		ENSG00000244586
		ENSG00000250327
		ENSG00000199470
		ENSG00000223656
		ENSG00000235590
		ENSG00000254788
		ENSG00000271880
		ENSG00000223584
		ENSG00000102760
		ENSG00000199509
		ENSG00000269431
		ENSG00000281128
		ENSG00000199458
		ENSG00000124721
		ENSG00000108878
		ENSG00000280147
		ENSG00000225836
		ENSG00000261294
		ENSG00000138741
		ENSG00000260395
		ENSG00000225535
		ENSG00000248554
		ENSG00000248722
		ENSG00000267345
		ENSG00000128422
		ENSG00000117122
		ENSG00000236296
		ENSG00000230484
		ENSG00000261832
		ENSG00000277893
		ENSG00000242578
		ENSG00000130711
		ENSG00000235014
		ENSG00000120937
		ENSG00000112559
		ENSG00000233129
		ENSG00000275800
		ENSG00000109255
		ENSG00000260342
		ENSG00000157766
		ENSG00000228740
		ENSG00000253544
		ENSG00000135097
		ENSG00000250889
		ENSG00000231621
		ENSG00000279324
		ENSG00000274376
		ENSG00000265282
		ENSG00000271461
		ENSG00000279878
		ENSG00000221052
		ENSG00000113946
		ENSG00000253661
		ENSG00000264859
		ENSG00000228577
		ENSG00000133246
		ENSG00000215218
		ENSG00000232292
		ENSG00000227032
		ENSG00000078295
		ENSG00000197937
		ENSG00000119915
		ENSG00000221923
		ENSG00000258454
Up 0.25_24h Up 0.25_8h Up 0.5_8h	55	ENSG00000263641
		ENSG00000230084
		ENSG00000278449
		ENSG00000223677
		ENSG00000227279
		ENSG00000214825
		ENSG00000278892
		ENSG00000239722
		ENSG00000230208
		ENSG00000227066
		ENSG00000239480
		ENSG00000283237
		ENSG00000124467
		ENSG00000229544
		ENSG00000254664
		ENSG00000250519
		ENSG00000231877
		ENSG00000207771
		ENSG00000248416
		ENSG00000200227
		ENSG00000224001
		ENSG00000258262
		ENSG00000196569
		ENSG00000160801
		ENSG00000207105
		ENSG00000236668
		ENSG00000103522
		ENSG00000174498
		ENSG00000260738
		ENSG00000225497
		ENSG00000237617
		ENSG00000237740
		ENSG00000267571
		ENSG00000180644
		ENSG00000144285
		ENSG00000231512
		ENSG00000250410
		ENSG00000244436
		ENSG00000136514
		ENSG00000244632
		ENSG00000279220
		ENSG00000284612
		ENSG00000200629
		ENSG00000207136
		ENSG00000228166
		ENSG00000258459
		ENSG00000235631
		ENSG00000176165
		ENSG00000256249
		ENSG00000102924
		ENSG00000101958
		ENSG00000229505
		ENSG00000169436
		ENSG00000222007
		ENSG00000275846
Up 0.25_8h Up 0.5_24h Up 0.5_8h	102	ENSG00000248279
		ENSG00000166143
		ENSG00000279848
		ENSG00000121377
		ENSG00000146755
		ENSG00000234936
		ENSG00000105219
		ENSG00000275900
		ENSG00000240502
		ENSG00000243601
		ENSG00000154764
		ENSG00000178821
		ENSG00000228411
		ENSG00000231346
		ENSG00000265489
		ENSG00000256403
		ENSG00000254781
		ENSG00000260616
		ENSG00000267231
		ENSG00000272589
		ENSG00000276027
		ENSG00000267372
		ENSG00000280053
		ENSG00000206762
		ENSG00000234199
		ENSG00000129221
		ENSG00000131379
		ENSG00000228862
		ENSG00000277247
		ENSG00000272282
		ENSG00000230417
		ENSG00000233623
		ENSG00000244006
		ENSG00000259823
		ENSG00000102854
		ENSG00000075043
		ENSG00000259828
		ENSG00000255946
		ENSG00000248735
		ENSG00000255459
		ENSG00000124196
		ENSG00000242989
		ENSG00000271185
		ENSG00000149968
		ENSG00000167083
		ENSG00000234044
		ENSG00000188227
		ENSG00000259182
		ENSG00000228204
		ENSG00000186265
		ENSG00000234772
		ENSG00000234016
		ENSG00000271164
		ENSG00000256673
		ENSG00000253022
		ENSG00000243374
		ENSG00000258926
		ENSG00000159708
		ENSG00000186710
		ENSG00000252214
		ENSG00000257754
		ENSG00000261325
		ENSG00000255256
		ENSG00000144218
		ENSG00000253418
		ENSG00000276765
		ENSG00000148408
		ENSG00000229228
		ENSG00000215853
		ENSG00000163520
		ENSG00000242657
		ENSG00000275965
		ENSG00000251396
		ENSG00000112462
		ENSG00000274286
		ENSG00000257359
		ENSG00000170627
		ENSG00000258628
		ENSG00000272573
		ENSG00000243980
		ENSG00000259227
		ENSG00000257202
		ENSG00000235818
		ENSG00000267026
		ENSG00000124260
		ENSG00000252139
		ENSG00000069712
		ENSG00000242560
		ENSG00000158050
		ENSG00000228016
		ENSG00000231233
		ENSG00000235035
		ENSG00000272414
		ENSG00000186431
		ENSG00000225752
		ENSG00000230240
		ENSG00000216713
		ENSG00000232474
		ENSG00000239580
		ENSG00000214102
		ENSG00000189127
		ENSG00000237252
Up 0.25_24h Up 0.25_8h Up 0.5_24h	111	ENSG00000280286
		ENSG00000267707
		ENSG00000249623
		ENSG00000234899
		ENSG00000272884
		ENSG00000130700
		ENSG00000235790
		ENSG00000222005
		ENSG00000253190
		ENSG00000236226
		ENSG00000232179
		ENSG00000167766
		ENSG00000212214
		ENSG00000115423
		ENSG00000214456
		ENSG00000264970
		ENSG00000176951
		ENSG00000228288
		ENSG00000226673
		ENSG00000271236
		ENSG00000254974
		ENSG00000265160
		ENSG00000237422
		ENSG00000188848
		ENSG00000224649
		ENSG00000175287
		ENSG00000259867
		ENSG00000273216
		ENSG00000267328
		ENSG00000123843
		ENSG00000174792
		ENSG00000250541
		ENSG00000224927
		ENSG00000223847
		ENSG00000235052
		ENSG00000280660
		ENSG00000259870
		ENSG00000251656
		ENSG00000254340
		ENSG00000271947
		ENSG00000268536
		ENSG00000171649
		ENSG00000201329
		ENSG00000184867
		ENSG00000234206
		ENSG00000104901
		ENSG00000257271
		ENSG00000245667
		ENSG00000170579
		ENSG00000189068
		ENSG00000267463
		ENSG00000232301
		ENSG00000198326
		ENSG00000178776
		ENSG00000234134
		ENSG00000235385
		ENSG00000199530
		ENSG00000262966
		ENSG00000257921
		ENSG00000278346
		ENSG00000267212
		ENSG00000227911
		ENSG00000254924
		ENSG00000256195
		ENSG00000010810
		ENSG00000115607
		ENSG00000188660
		ENSG00000272319
		ENSG00000167914
		ENSG00000229326
		ENSG00000228948
		ENSG00000205056
		ENSG00000258086
		ENSG00000259468
		ENSG00000232998
		ENSG00000199570
		ENSG00000225766
		ENSG00000232117
		ENSG00000183918
		ENSG00000068831
		ENSG00000279012
		ENSG00000246575
		ENSG00000189275
		ENSG00000259125
		ENSG00000270024
		ENSG00000134343
		ENSG00000260072
		ENSG00000232374
		ENSG00000259637
		ENSG00000229918
		ENSG00000238260
		ENSG00000224389
		ENSG00000279609
		ENSG00000248871
		ENSG00000277214
		ENSG00000237501
		ENSG00000259905
		ENSG00000243137
		ENSG00000261437
		ENSG00000234323
		ENSG00000267262
		ENSG00000245112
		ENSG00000269883
		ENSG00000237074
		ENSG00000087589
		ENSG00000273855
		ENSG00000214357
		ENSG00000257880
		ENSG00000183662
		ENSG00000251279
		ENSG00000237166
Up 0.25_24h Up 0.5_24h Up 0.5_8h	70	ENSG00000271420
		ENSG00000087250
		ENSG00000267024
		ENSG00000255587
		ENSG00000233673
		ENSG00000143632
		ENSG00000262172
		ENSG00000231636
		ENSG00000255339
		ENSG00000236108
		ENSG00000226435
		ENSG00000207619
		ENSG00000265976
		ENSG00000244280
		ENSG00000244255
		ENSG00000131737
		ENSG00000169594
		ENSG00000198719
		ENSG00000253426
		ENSG00000154330
		ENSG00000262408
		ENSG00000276772
		ENSG00000260146
		ENSG00000283907
		ENSG00000248459
		ENSG00000007174
		ENSG00000132854
		ENSG00000164669
		ENSG00000251574
		ENSG00000255281
		ENSG00000261873
		ENSG00000276525
		ENSG00000253315
		ENSG00000260494
		ENSG00000157423
		ENSG00000267200
		ENSG00000130176
		ENSG00000267450
		ENSG00000223756
		ENSG00000248283
		ENSG00000200179
		ENSG00000163673
		ENSG00000143318
		ENSG00000260425
		ENSG00000251221
		ENSG00000255456
		ENSG00000077279
		ENSG00000277481
		ENSG00000086696
		ENSG00000253343
		ENSG00000205054
		ENSG00000115844
		ENSG00000265590
		ENSG00000227702
		ENSG00000222889
		ENSG00000254266
		ENSG00000274294
		ENSG00000283867
		ENSG00000230061
		ENSG00000137265
		ENSG00000104888
		ENSG00000215915
		ENSG00000260823
		ENSG00000225479
		ENSG00000260488
		ENSG00000128714
		ENSG00000229807
		ENSG00000233581
		ENSG00000153993
		ENSG00000234661
Up 0.25_8h Up 0.5_8h	470	ENSG00000127329
		ENSG00000260249
		ENSG00000206796
		ENSG00000251788
		ENSG00000261095
		ENSG00000149256
		ENSG00000280134
		ENSG00000251128
		ENSG00000260185
		ENSG00000229674
		ENSG00000232977
		ENSG00000120242
		ENSG00000163283
		ENSG00000175841
		ENSG00000254700
		ENSG00000267254
		ENSG00000262160
		ENSG00000269540
		ENSG00000283268
		ENSG00000197213
		ENSG00000225251
		ENSG00000162873
		ENSG00000281731
		ENSG00000250579
		ENSG00000264316
		ENSG00000264585
		ENSG00000269119
		ENSG00000252480
		ENSG00000254016
		ENSG00000275529
		ENSG00000200630
		ENSG00000212122
		ENSG00000139292
		ENSG00000266941
		ENSG00000249138
		ENSG00000269693
		ENSG00000258535
		ENSG00000249295
		ENSG00000175707
		ENSG00000250020
		ENSG00000214161
		ENSG00000226329
		ENSG00000260777
		ENSG00000260144
		ENSG00000071242
		ENSG00000251173
		ENSG00000205578
		ENSG00000253668
		ENSG00000249375
		ENSG00000243607
		ENSG00000255319
		ENSG00000120262
		ENSG00000283189
		ENSG00000263107
		ENSG00000105679
		ENSG00000260772
		ENSG00000215837
		ENSG00000214447
		ENSG00000273301
		ENSG00000264941
		ENSG00000275001
		ENSG00000223576
		ENSG00000231134
		ENSG00000273160
		ENSG00000214305
		ENSG00000233705
		ENSG00000227659
		ENSG00000187808
		ENSG00000165935
		ENSG00000185040
		ENSG00000279981
		ENSG00000223884
		ENSG00000235280
		ENSG00000183813
		ENSG00000260238
		ENSG00000126259
		ENSG00000197617
		ENSG00000279286
		ENSG00000278073
		ENSG00000121101
		ENSG00000228748
		ENSG00000264019
		ENSG00000121905
		ENSG00000161405
		ENSG00000241082
		ENSG00000279590
		ENSG00000233098
		ENSG00000172733
		ENSG00000279674
		ENSG00000221230
		ENSG00000236616
		ENSG00000179840
		ENSG00000267084
		ENSG00000248472
		ENSG00000226209
		ENSG00000249188
		ENSG00000275981
		ENSG00000228037
		ENSG00000222488
		ENSG00000199069
		ENSG00000240426
		ENSG00000261534
		ENSG00000091513
		ENSG00000249590
		ENSG00000262362
		ENSG00000281538
		ENSG00000249407
		ENSG00000213927
		ENSG00000251563
		ENSG00000226580
		ENSG00000278222
		ENSG00000201867
		ENSG00000242324
		ENSG00000277269
		ENSG00000165694
		ENSG00000204659
		ENSG00000235214
		ENSG00000223247
		ENSG00000237139
		ENSG00000249158
		ENSG00000196711
		ENSG00000257838
		ENSG00000213150
		ENSG00000271440
		ENSG00000249635
		ENSG00000253054
		ENSG00000162367
		ENSG00000277512
		ENSG00000175746
		ENSG00000260282
		ENSG00000259171
		ENSG00000176746
		ENSG00000230530
		ENSG00000279160
		ENSG00000160862
		ENSG00000244300
		ENSG00000273721
		ENSG00000253006
		ENSG00000162896
		ENSG00000213057
		ENSG00000230570
		ENSG00000201448
		ENSG00000198520
		ENSG00000184599
		ENSG00000166831
		ENSG00000224066
		ENSG00000123612
		ENSG00000239281
		ENSG00000111704
		ENSG00000272942
		ENSG00000207186
		ENSG00000164256
		ENSG00000235924
		ENSG00000180834
		ENSG00000196189
		ENSG00000261996
		ENSG00000241866
		ENSG00000271981
		ENSG00000186912
		ENSG00000267743
		ENSG00000279370
		ENSG00000175899
		ENSG00000256995
		ENSG00000164116
		ENSG00000267690
		ENSG00000228614
		ENSG00000223683
		ENSG00000180432
		ENSG00000262481
		ENSG00000226877
		ENSG00000280354
		ENSG00000228882
		ENSG00000281883
		ENSG00000199605
		ENSG00000263938
		ENSG00000249675
		ENSG00000229091
		ENSG00000264101
		ENSG00000279855
		ENSG00000278863
		ENSG00000226806
		ENSG00000230914
		ENSG00000259700
		ENSG00000272578
		ENSG00000229299
		ENSG00000248254
		ENSG00000265743
		ENSG00000238256
		ENSG00000260895
		ENSG00000270405
		ENSG00000221643
		ENSG00000260281
		ENSG00000268262
		ENSG00000250748
		ENSG00000183034
		ENSG00000172139
		ENSG00000239253
		ENSG00000257078
		ENSG00000252487
		ENSG00000170807
		ENSG00000258984
		ENSG00000157782
		ENSG00000254622
		ENSG00000175161
		ENSG00000254855
		ENSG00000250260
		ENSG00000249096
		ENSG00000261043
		ENSG00000115297
		ENSG00000257108
		ENSG00000269226
		ENSG00000203356
		ENSG00000235994
		ENSG00000271787
		ENSG00000227300
		ENSG00000283023
		ENSG00000199032
		ENSG00000201583
		ENSG00000165091
		ENSG00000224441
		ENSG00000203740
		ENSG00000241439
		ENSG00000113578
		ENSG00000228484
		ENSG00000143627
		ENSG00000230524
		ENSG00000249896
		ENSG00000100399
		ENSG00000185028
		ENSG00000135477
		ENSG00000254192
		ENSG00000167178
		ENSG00000239435
		ENSG00000235545
		ENSG00000205959
		ENSG00000202361
		ENSG00000236871
		ENSG00000225652
		ENSG00000261175
		ENSG00000283683
		ENSG00000203663
		ENSG00000225385
		ENSG00000223489
		ENSG00000277698
		ENSG00000199938
		ENSG00000266059
		ENSG00000164385
		ENSG00000227832
		ENSG00000283317
		ENSG00000137270
		ENSG00000205978
		ENSG00000224289
		ENSG00000207696
		ENSG00000249846
		ENSG00000252839
		ENSG00000240591
		ENSG00000269807
		ENSG00000284194
		ENSG00000105538
		ENSG00000279061
		ENSG00000215005
		ENSG00000177374
		ENSG00000199667
		ENSG00000280164
		ENSG00000278990
		ENSG00000241052
		ENSG00000234224
		ENSG00000271680
		ENSG00000134249
		ENSG00000266100
		ENSG00000198787
		ENSG00000241188
		ENSG00000206910
		ENSG00000259083
		ENSG00000144182
		ENSG00000228988
		ENSG00000275978
		ENSG00000275332
		ENSG00000277013
		ENSG00000164929
		ENSG00000222503
		ENSG00000261522
		ENSG00000230461
		ENSG00000259788
		ENSG00000167359
		ENSG00000241219
		ENSG00000139364
		ENSG00000121270
		ENSG00000183833
		ENSG00000150783
		ENSG00000258811
		ENSG00000239906
		ENSG00000257159
		ENSG00000184908
		ENSG00000284461
		ENSG00000207587
		ENSG00000163016
		ENSG00000278880
		ENSG00000273481
		ENSG00000224942
		ENSG00000207435
		ENSG00000162685
		ENSG00000231948
		ENSG00000275391
		ENSG00000138315
		ENSG00000250501
		ENSG00000260269
		ENSG00000231083
		ENSG00000274748
		ENSG00000260244
		ENSG00000198099
		ENSG00000271227
		ENSG00000277483
		ENSG00000207633
		ENSG00000207172
		ENSG00000259416
		ENSG00000164008
		ENSG00000237390
		ENSG00000232600
		ENSG00000118160
		ENSG00000215160
		ENSG00000203876
		ENSG00000272267
		ENSG00000279122
		ENSG00000202461
		ENSG00000235191
		ENSG00000223890
		ENSG00000273565
		ENSG00000188771
		ENSG00000229901
		ENSG00000205861
		ENSG00000250848
		ENSG00000229032
		ENSG00000278265
		ENSG00000278954
		ENSG00000007933
		ENSG00000101082
		ENSG00000241697
		ENSG00000251939
		ENSG00000233701
		ENSG00000243723
		ENSG00000269968
		ENSG00000260628
		ENSG00000232710
		ENSG00000222076
		ENSG00000265139
		ENSG00000200685
		ENSG00000231249
		ENSG00000171695
		ENSG00000266891
		ENSG00000255303
		ENSG00000201075
		ENSG00000230295
		ENSG00000228092
		ENSG00000204588
		ENSG00000240296
		ENSG00000284727
		ENSG00000258949
		ENSG00000274475
		ENSG00000232502
		ENSG00000185186
		ENSG00000221745
		ENSG00000224844
		ENSG00000248791
		ENSG00000233519
		ENSG00000228431
		ENSG00000228723
		ENSG00000265260
		ENSG00000272542
		ENSG00000225498
		ENSG00000204335
		ENSG00000260410
		ENSG00000251378
		ENSG00000205930
		ENSG00000166341
		ENSG00000200883
		ENSG00000239705
		ENSG00000253392
		ENSG00000270981
		ENSG00000230192
		ENSG00000232190
		ENSG00000261978
		ENSG00000262497
		ENSG00000279441
		ENSG00000092607
		ENSG00000256481
		ENSG00000104814
		ENSG00000213076
		ENSG00000283199
		ENSG00000258695
		ENSG00000267130
		ENSG00000214803
		ENSG00000284737
		ENSG00000233509
		ENSG00000254225
		ENSG00000253516
		ENSG00000115252
		ENSG00000187627
		ENSG00000150594
		ENSG00000264313
		ENSG00000272020
		ENSG00000269068
		ENSG00000173198
		ENSG00000200673
		ENSG00000278732
		ENSG00000239704
		ENSG00000258271
		ENSG00000225731
		ENSG00000254460
		ENSG00000283458
		ENSG00000226465
		ENSG00000211575
		ENSG00000231102
		ENSG00000089505
		ENSG00000201984
		ENSG00000258414
		ENSG00000273428
		ENSG00000170615
		ENSG00000230104
		ENSG00000267706
		ENSG00000172840
		ENSG00000263426
		ENSG00000214946
		ENSG00000241064
		ENSG00000232128
		ENSG00000276418
		ENSG00000174171
		ENSG00000116183
		ENSG00000249857
		ENSG00000279143
		ENSG00000232754
		ENSG00000235721
		ENSG00000274568
		ENSG00000241870
		ENSG00000268870
		ENSG00000280284
		ENSG00000234579
		ENSG00000225112
		ENSG00000244376
		ENSG00000083067
		ENSG00000270132
		ENSG00000277701
		ENSG00000251798
		ENSG00000207251
		ENSG00000277246
		ENSG00000262322
		ENSG00000186790
		ENSG00000019549
		ENSG00000179082
		ENSG00000267650
		ENSG00000226833
		ENSG00000278497
		ENSG00000259314
		ENSG00000271418
		ENSG00000226699
		ENSG00000232028
		ENSG00000134594
		ENSG00000213023
		ENSG00000273403
		ENSG00000218347
		ENSG00000254774
		ENSG00000237259
		ENSG00000239593
		ENSG00000142700
		ENSG00000238186
		ENSG00000275273
		ENSG00000224817
		ENSG00000131398
		ENSG00000231327
		ENSG00000270164
Up 0.25_24h Up 0.25_8h	113	ENSG00000186479
		ENSG00000230873
		ENSG00000050628
		ENSG00000280431
		ENSG00000102230
		ENSG00000231013
		ENSG00000224706
		ENSG00000241572
		ENSG00000224221
		ENSG00000272634
		ENSG00000273132
		ENSG00000284670
		ENSG00000236445
		ENSG00000176160
		ENSG00000257696
		ENSG00000232079
		ENSG00000276003
		ENSG00000175497
		ENSG00000167945
		ENSG00000180061
		ENSG00000277837
		ENSG00000263264
		ENSG00000186440
		ENSG00000113494
		ENSG00000251278
		ENSG00000176922
		ENSG00000197467
		ENSG00000244738
		ENSG00000166265
		ENSG00000179580
		ENSG00000253555
		ENSG00000264675
		ENSG00000182070
		ENSG00000202059
		ENSG00000230087
		ENSG00000236940
		ENSG00000160284
		ENSG00000179388
		ENSG00000225487
		ENSG00000157613
		ENSG00000261429
		ENSG00000178568
		ENSG00000180934
		ENSG00000228527
		ENSG00000259219
		ENSG00000196289
		ENSG00000159247
		ENSG00000222826
		ENSG00000258456
		ENSG00000256504
		ENSG00000213171
		ENSG00000064218
		ENSG00000250914
		ENSG00000275649
		ENSG00000180913
		ENSG00000183668
		ENSG00000230617
		ENSG00000259933
		ENSG00000196092
		ENSG00000168135
		ENSG00000180043
		ENSG00000238171
		ENSG00000212153
		ENSG00000187166
		ENSG00000251819
		ENSG00000082397
		ENSG00000264105
		ENSG00000250043
		ENSG00000217585
		ENSG00000273972
		ENSG00000204709
		ENSG00000274859
		ENSG00000258104
		ENSG00000266824
		ENSG00000226875
		ENSG00000260302
		ENSG00000260905
		ENSG00000263893
		ENSG00000163888
		ENSG00000163202
		ENSG00000252202
		ENSG00000272911
		ENSG00000251281
		ENSG00000109943
		ENSG00000207369
		ENSG00000228815
		ENSG00000189184
		ENSG00000227999
		ENSG00000145936
		ENSG00000278433
		ENSG00000264934
		ENSG00000035720
		ENSG00000259433
		ENSG00000278847
		ENSG00000242768
		ENSG00000157087
		ENSG00000253773
		ENSG00000248654
		ENSG00000204661
		ENSG00000224469
		ENSG00000188662
		ENSG00000256285
		ENSG00000116544
		ENSG00000283379
		ENSG00000237327
		ENSG00000249493
		ENSG00000274344
		ENSG00000239641
		ENSG00000054219
		ENSG00000214955
		ENSG00000222376
		ENSG00000261049
		ENSG00000267245
Up 0.25_8h Up 0.5_24h	195	ENSG00000221813
		ENSG00000251320
		ENSG00000218690
		ENSG00000278572
		ENSG00000202502
		ENSG00000274934
		ENSG00000207118
		ENSG00000264834
		ENSG00000184611
		ENSG00000078725
		ENSG00000237693
		ENSG00000257569
		ENSG00000119919
		ENSG00000186687
		ENSG00000272146
		ENSG00000250509
		ENSG00000271858
		ENSG00000226441
		ENSG00000239316
		ENSG00000171724
		ENSG00000261356
		ENSG00000259271
		ENSG00000170044
		ENSG00000240847
		ENSG00000263914
		ENSG00000236024
		ENSG00000102349
		ENSG00000221753
		ENSG00000084734
		ENSG00000163736
		ENSG00000208023
		ENSG00000269271
		ENSG00000228664
		ENSG00000229827
		ENSG00000139220
		ENSG00000250584
		ENSG00000263595
		ENSG00000250972
		ENSG00000201635
		ENSG00000243417
		ENSG00000258654
		ENSG00000081051
		ENSG00000234699
		ENSG00000255057
		ENSG00000183747
		ENSG00000239595
		ENSG00000275371
		ENSG00000256734
		ENSG00000165807
		ENSG00000249192
		ENSG00000229687
		ENSG00000166927
		ENSG00000267581
		ENSG00000283327
		ENSG00000273377
		ENSG00000147570
		ENSG00000109991
		ENSG00000213085
		ENSG00000233464
		ENSG00000281156
		ENSG00000225025
		ENSG00000261272
		ENSG00000263556
		ENSG00000283654
		ENSG00000258643
		ENSG00000258907
		ENSG00000249418
		ENSG00000264990
		ENSG00000284292
		ENSG00000267001
		ENSG00000272372
		ENSG00000243548
		ENSG00000234283
		ENSG00000218020
		ENSG00000148357
		ENSG00000163492
		ENSG00000238107
		ENSG00000254634
		ENSG00000272827
		ENSG00000260541
		ENSG00000272848
		ENSG00000255546
		ENSG00000203395
		ENSG00000230174
		ENSG00000175489
		ENSG00000267058
		ENSG00000258256
		ENSG00000280890
		ENSG00000250505
		ENSG00000272397
		ENSG00000284413
		ENSG00000231957
		ENSG00000237222
		ENSG00000200406
		ENSG00000270430
		ENSG00000271803
		ENSG00000158077
		ENSG00000244459
		ENSG00000234611
		ENSG00000196796
		ENSG00000228151
		ENSG00000243991
		ENSG00000121904
		ENSG00000182885
		ENSG00000203496
		ENSG00000266120
		ENSG00000213981
		ENSG00000258878
		ENSG00000235772
		ENSG00000267550
		ENSG00000233183
		ENSG00000129170
		ENSG00000264823
		ENSG00000231718
		ENSG00000136267
		ENSG00000256953
		ENSG00000235426
		ENSG00000241997
		ENSG00000229104
		ENSG00000243173
		ENSG00000244003
		ENSG00000103472
		ENSG00000232896
		ENSG00000137843
		ENSG00000265089
		ENSG00000282034
		ENSG00000222650
		ENSG00000149573
		ENSG00000205863
		ENSG00000196872
		ENSG00000196570
		ENSG00000234630
		ENSG00000218976
		ENSG00000252928
		ENSG00000239510
		ENSG00000222371
		ENSG00000176040
		ENSG00000271166
		ENSG00000240874
		ENSG00000265606
		ENSG00000243738
		ENSG00000254057
		ENSG00000226904
		ENSG00000256262
		ENSG00000217746
		ENSG00000258815
		ENSG00000236521
		ENSG00000227245
		ENSG00000221445
		ENSG00000134323
		ENSG00000200492
		ENSG00000205333
		ENSG00000206013
		ENSG00000204011
		ENSG00000255384
		ENSG00000233817
		ENSG00000248133
		ENSG00000240116
		ENSG00000213973
		ENSG00000224409
		ENSG00000206865
		ENSG00000232382
		ENSG00000225511
		ENSG00000161992
		ENSG00000180803
		ENSG00000255145
		ENSG00000254396
		ENSG00000279726
		ENSG00000180549
		ENSG00000180090
		ENSG00000140279
		ENSG00000186676
		ENSG00000277448
		ENSG00000212899
		ENSG00000277051
		ENSG00000249141
		ENSG00000244502
		ENSG00000200605
		ENSG00000269091
		ENSG00000273584
		ENSG00000242948
		ENSG00000250662
		ENSG00000255847
		ENSG00000254738
		ENSG00000230162
		ENSG00000268938
		ENSG00000256029
		ENSG00000254650
		ENSG00000221867
		ENSG00000272729
		ENSG00000271434
		ENSG00000268818
		ENSG00000225767
		ENSG00000018607
		ENSG00000132259
Up 0.25_24h Up 0.5_8h	65	ENSG00000158731
		ENSG00000212901
		ENSG00000240427
		ENSG00000238263
		ENSG00000267505
		ENSG00000090382
		ENSG00000259163
		ENSG00000225492
		ENSG00000212429
		ENSG00000167554
		ENSG00000252685
		ENSG00000124102
		ENSG00000226235
		ENSG00000183571
		ENSG00000246662
		ENSG00000207320
		ENSG00000259064
		ENSG00000256923
		ENSG00000260903
		ENSG00000263909
		ENSG00000154162
		ENSG00000259213
		ENSG00000259362
		ENSG00000224116
		ENSG00000224442
		ENSG00000184814
		ENSG00000186407
		ENSG00000279884
		ENSG00000147614
		ENSG00000179855
		ENSG00000188707
		ENSG00000225885
		ENSG00000229723
		ENSG00000188223
		ENSG00000272366
		ENSG00000140506
		ENSG00000249094
		ENSG00000196748
		ENSG00000235051
		ENSG00000204655
		ENSG00000254403
		ENSG00000205832
		ENSG00000236833
		ENSG00000090534
		ENSG00000185274
		ENSG00000257429
		ENSG00000200304
		ENSG00000268163
		ENSG00000238001
		ENSG00000181325
		ENSG00000258346
		ENSG00000196277
		ENSG00000229140
		ENSG00000253953
		ENSG00000267361
		ENSG00000212657
		ENSG00000267748
		ENSG00000253401
		ENSG00000274932
		ENSG00000177272
		ENSG00000239775
		ENSG00000252854
		ENSG00000129993
		ENSG00000227210
		ENSG00000253574
Up 0.5_24h Up 0.5_8h	146	ENSG00000278421
		ENSG00000196664
		ENSG00000283973
		ENSG00000283567
		ENSG00000173213
		ENSG00000234921
		ENSG00000240511
		ENSG00000249102
		ENSG00000275054
		ENSG00000104722
		ENSG00000235601
		ENSG00000198967
		ENSG00000276790
		ENSG00000267373
		ENSG00000178828
		ENSG00000272882
		ENSG00000271239
		ENSG00000157330
		ENSG00000277734
		ENSG00000115339
		ENSG00000174343
		ENSG00000280281
		ENSG00000201663
		ENSG00000257730
		ENSG00000231933
		ENSG00000234230
		ENSG00000214857
		ENSG00000255439
		ENSG00000282995
		ENSG00000256008
		ENSG00000234285
		ENSG00000276598
		ENSG00000169994
		ENSG00000205177
		ENSG00000229972
		ENSG00000255537
		ENSG00000260198
		ENSG00000112175
		ENSG00000266604
		ENSG00000147676
		ENSG00000171570
		ENSG00000230607
		ENSG00000172782
		ENSG00000267922
		ENSG00000252941
		ENSG00000256609
		ENSG00000232403
		ENSG00000082175
		ENSG00000152670
		ENSG00000237971
		ENSG00000198795
		ENSG00000167580
		ENSG00000189280
		ENSG00000186335
		ENSG00000176798
		ENSG00000202322
		ENSG00000119457
		ENSG00000243978
		ENSG00000272647
		ENSG00000242586
		ENSG00000137707
		ENSG00000274834
		ENSG00000257580
		ENSG00000144331
		ENSG00000172123
		ENSG00000167755
		ENSG00000269583
		ENSG00000189337
		ENSG00000109758
		ENSG00000107859
		ENSG00000249409
		ENSG00000283234
		ENSG00000183389
		ENSG00000274351
		ENSG00000201129
		ENSG00000180663
		ENSG00000235930
		ENSG00000278135
		ENSG00000201363
		ENSG00000241123
		ENSG00000236545
		ENSG00000253799
		ENSG00000117598
		ENSG00000243225
		ENSG00000277947
		ENSG00000225988
		ENSG00000253292
		ENSG00000171722
		ENSG00000199797
		ENSG00000231098
		ENSG00000206863
		ENSG00000101850
		ENSG00000185448
		ENSG00000279711
		ENSG00000261812
		ENSG00000283503
		ENSG00000239703
		ENSG00000225564
		ENSG00000235108
		ENSG00000188386
		ENSG00000284512
		ENSG00000274883
		ENSG00000267783
		ENSG00000284640
		ENSG00000255234
		ENSG00000205502
		ENSG00000212490
		ENSG00000267393
		ENSG00000259722
		ENSG00000201102
		ENSG00000260398
		ENSG00000218410
		ENSG00000113303
		ENSG00000243179
		ENSG00000266306
		ENSG00000238457
		ENSG00000234810
		ENSG00000272387
		ENSG00000188676
		ENSG00000255240
		ENSG00000259088
		ENSG00000264204
		ENSG00000260458
		ENSG00000260224
		ENSG00000263020
		ENSG00000261319
		ENSG00000226164
		ENSG00000280444
		ENSG00000162510
		ENSG00000225156
		ENSG00000240280
		ENSG00000268575
		ENSG00000214559
		ENSG00000253111
		ENSG00000207201
		ENSG00000188624
		ENSG00000169067
		ENSG00000224857
		ENSG00000242101
		ENSG00000205683
		ENSG00000254180
		ENSG00000159212
		ENSG00000265690
		ENSG00000223995
		ENSG00000228413
		ENSG00000280359
Up 0.25_24h Up 0.5_24h	968	ENSG00000278153
		ENSG00000182450
		ENSG00000254756
		ENSG00000279733
		ENSG00000171496
		ENSG00000184497
		ENSG00000127529
		ENSG00000236990
		ENSG00000172519
		ENSG00000199866
		ENSG00000165566
		ENSG00000101842
		ENSG00000275134
		ENSG00000179776
		ENSG00000265128
		ENSG00000264966
		ENSG00000253829
		ENSG00000177098
		ENSG00000206749
		ENSG00000224621
		ENSG00000268288
		ENSG00000127084
		ENSG00000213533
		ENSG00000197550
		ENSG00000254678
		ENSG00000274840
		ENSG00000253027
		ENSG00000261723
		ENSG00000229931
		ENSG00000143217
		ENSG00000206805
		ENSG00000268293
		ENSG00000248810
		ENSG00000201207
		ENSG00000219188
		ENSG00000147697
		ENSG00000279214
		ENSG00000261329
		ENSG00000215930
		ENSG00000251076
		ENSG00000261898
		ENSG00000284716
		ENSG00000010319
		ENSG00000205955
		ENSG00000085552
		ENSG00000227712
		ENSG00000280249
		ENSG00000260836
		ENSG00000162894
		ENSG00000126233
		ENSG00000275789
		ENSG00000270948
		ENSG00000103184
		ENSG00000228770
		ENSG00000229238
		ENSG00000170989
		ENSG00000207303
		ENSG00000172350
		ENSG00000260471
		ENSG00000254542
		ENSG00000189056
		ENSG00000167656
		ENSG00000256349
		ENSG00000163885
		ENSG00000238906
		ENSG00000254445
		ENSG00000166589
		ENSG00000271081
		ENSG00000257515
		ENSG00000258437
		ENSG00000260247
		ENSG00000213401
		ENSG00000132026
		ENSG00000215120
		ENSG00000146005
		ENSG00000162543
		ENSG00000188672
		ENSG00000234208
		ENSG00000227115
		ENSG00000259591
		ENSG00000176641
		ENSG00000066032
		ENSG00000171310
		ENSG00000232739
		ENSG00000272265
		ENSG00000254050
		ENSG00000239822
		ENSG00000238344
		ENSG00000274884
		ENSG00000230778
		ENSG00000146556
		ENSG00000200367
		ENSG00000120162
		ENSG00000138483
		ENSG00000269053
		ENSG00000172995
		ENSG00000273958
		ENSG00000251639
		ENSG00000275389
		ENSG00000118473
		ENSG00000204704
		ENSG00000201737
		ENSG00000277118
		ENSG00000269635
		ENSG00000257389
		ENSG00000173261
		ENSG00000273927
		ENSG00000252995
		ENSG00000279411
		ENSG00000244558
		ENSG00000254412
		ENSG00000260352
		ENSG00000127507
		ENSG00000248516
		ENSG00000170289
		ENSG00000257083
		ENSG00000196408
		ENSG00000250072
		ENSG00000108823
		ENSG00000233848
		ENSG00000200309
		ENSG00000267717
		ENSG00000154342
		ENSG00000237945
		ENSG00000235475
		ENSG00000207073
		ENSG00000179994
		ENSG00000264435
		ENSG00000201710
		ENSG00000070729
		ENSG00000226249
		ENSG00000262003
		ENSG00000205089
		ENSG00000268583
		ENSG00000215644
		ENSG00000147647
		ENSG00000092068
		ENSG00000215692
		ENSG00000253475
		ENSG00000202497
		ENSG00000173679
		ENSG00000259357
		ENSG00000213527
		ENSG00000198300
		ENSG00000284660
		ENSG00000263834
		ENSG00000283415
		ENSG00000231369
		ENSG00000100024
		ENSG00000147571
		ENSG00000223382
		ENSG00000248506
		ENSG00000226926
		ENSG00000267366
		ENSG00000254960
		ENSG00000283117
		ENSG00000179097
		ENSG00000201885
		ENSG00000235033
		ENSG00000100628
		ENSG00000253510
		ENSG00000251247
		ENSG00000262304
		ENSG00000228079
		ENSG00000155918
		ENSG00000252764
		ENSG00000201687
		ENSG00000155269
		ENSG00000275662
		ENSG00000266049
		ENSG00000258465
		ENSG00000253519
		ENSG00000264102
		ENSG00000235319
		ENSG00000236366
		ENSG00000231909
		ENSG00000242941
		ENSG00000178586
		ENSG00000250551
		ENSG00000225611
		ENSG00000258964
		ENSG00000227467
		ENSG00000252614
		ENSG00000271167
		ENSG00000221878
		ENSG00000234857
		ENSG00000244649
		ENSG00000270750
		ENSG00000175336
		ENSG00000252317
		ENSG00000198077
		ENSG00000254551
		ENSG00000147234
		ENSG00000116701
		ENSG00000170929
		ENSG00000223570
		ENSG00000162998
		ENSG00000232936
		ENSG00000144583
		ENSG00000261231
		ENSG00000187068
		ENSG00000199914
		ENSG00000267583
		ENSG00000237734
		ENSG00000279020
		ENSG00000274984
		ENSG00000265201
		ENSG00000213030
		ENSG00000218565
		ENSG00000256552
		ENSG00000259663
		ENSG00000268056
		ENSG00000279043
		ENSG00000243549
		ENSG00000187510
		ENSG00000152784
		ENSG00000233107
		ENSG00000279933
		ENSG00000238755
		ENSG00000201806
		ENSG00000231073
		ENSG00000263916
		ENSG00000212279
		ENSG00000252622
		ENSG00000185271
		ENSG00000219240
		ENSG00000137285
		ENSG00000226890
		ENSG00000244232
		ENSG00000233551
		ENSG00000261265
		ENSG00000280453
		ENSG00000250768
		ENSG00000176076
		ENSG00000225822
		ENSG00000264391
		ENSG00000232646
		ENSG00000183775
		ENSG00000259803
		ENSG00000199411
		ENSG00000250391
		ENSG00000226665
		ENSG00000186300
		ENSG00000237031
		ENSG00000212461
		ENSG00000207585
		ENSG00000172031
		ENSG00000185518
		ENSG00000203288
		ENSG00000261219
		ENSG00000279142
		ENSG00000225595
		ENSG00000230694
		ENSG00000263511
		ENSG00000207551
		ENSG00000202111
		ENSG00000279949
		ENSG00000105929
		ENSG00000232455
		ENSG00000247699
		ENSG00000233012
		ENSG00000109956
		ENSG00000173728
		ENSG00000179253
		ENSG00000270898
		ENSG00000213272
		ENSG00000220204
		ENSG00000105559
		ENSG00000222558
		ENSG00000023892
		ENSG00000255237
		ENSG00000240893
		ENSG00000104164
		ENSG00000143320
		ENSG00000186118
		ENSG00000270641
		ENSG00000280040
		ENSG00000128510
		ENSG00000233030
		ENSG00000128254
		ENSG00000259469
		ENSG00000267579
		ENSG00000138356
		ENSG00000232470
		ENSG00000231298
		ENSG00000169402
		ENSG00000182230
		ENSG00000202528
		ENSG00000231588
		ENSG00000164107
		ENSG00000213588
		ENSG00000238295
		ENSG00000257327
		ENSG00000015285
		ENSG00000204872
		ENSG00000229795
		ENSG00000132965
		ENSG00000206142
		ENSG00000111729
		ENSG00000122641
		ENSG00000214070
		ENSG00000169247
		ENSG00000030304
		ENSG00000227945
		ENSG00000271969
		ENSG00000179136
		ENSG00000254873
		ENSG00000199102
		ENSG00000255354
		ENSG00000267774
		ENSG00000237289
		ENSG00000255317
		ENSG00000273669
		ENSG00000233973
		ENSG00000166682
		ENSG00000250482
		ENSG00000233558
		ENSG00000222960
		ENSG00000165917
		ENSG00000214402
		ENSG00000267022
		ENSG00000268941
		ENSG00000197044
		ENSG00000251254
		ENSG00000237417
		ENSG00000167800
		ENSG00000133063
		ENSG00000223598
		ENSG00000167311
		ENSG00000105889
		ENSG00000272043
		ENSG00000183629
		ENSG00000199426
		ENSG00000140968
		ENSG00000176904
		ENSG00000249961
		ENSG00000259925
		ENSG00000268355
		ENSG00000206609
		ENSG00000267828
		ENSG00000256596
		ENSG00000183287
		ENSG00000147113
		ENSG00000168309
		ENSG00000271092
		ENSG00000278146
		ENSG00000200183
		ENSG00000167483
		ENSG00000238719
		ENSG00000273056
		ENSG00000157554
		ENSG00000200591
		ENSG00000116141
		ENSG00000254253
		ENSG00000133477
		ENSG00000231810
		ENSG00000240405
		ENSG00000259377
		ENSG00000228020
		ENSG00000265251
		ENSG00000199460
		ENSG00000244731
		ENSG00000153283
		ENSG00000175591
		ENSG00000115232
		ENSG00000264263
		ENSG00000278890
		ENSG00000163645
		ENSG00000197768
		ENSG00000258602
		ENSG00000248664
		ENSG00000233246
		ENSG00000250247
		ENSG00000252643
		ENSG00000267501
		ENSG00000258798
		ENSG00000266010
		ENSG00000092758
		ENSG00000252943
		ENSG00000260955
		ENSG00000273948
		ENSG00000240774
		ENSG00000172243
		ENSG00000237452
		ENSG00000213487
		ENSG00000219797
		ENSG00000234477
		ENSG00000137463
		ENSG00000260165
		ENSG00000235085
		ENSG00000144821
		ENSG00000153976
		ENSG00000149596
		ENSG00000253155
		ENSG00000255970
		ENSG00000225528
		ENSG00000243789
		ENSG00000267510
		ENSG00000246211
		ENSG00000230426
		ENSG00000284057
		ENSG00000261250
		ENSG00000168631
		ENSG00000124256
		ENSG00000272632
		ENSG00000260552
		ENSG00000197646
		ENSG00000205312
		ENSG00000253750
		ENSG00000259029
		ENSG00000173391
		ENSG00000256566
		ENSG00000273933
		ENSG00000207755
		ENSG00000175093
		ENSG00000200175
		ENSG00000240137
		ENSG00000235510
		ENSG00000235254
		ENSG00000259346
		ENSG00000172969
		ENSG00000232290
		ENSG00000236266
		ENSG00000266649
		ENSG00000163501
		ENSG00000229747
		ENSG00000265243
		ENSG00000201659
		ENSG00000266958
		ENSG00000183607
		ENSG00000254248
		ENSG00000169891
		ENSG00000233654
		ENSG00000265641
		ENSG00000126010
		ENSG00000250732
		ENSG00000236280
		ENSG00000256377
		ENSG00000204362
		ENSG00000103018
		ENSG00000205396
		ENSG00000254441
		ENSG00000280103
		ENSG00000162444
		ENSG00000163508
		ENSG00000128591
		ENSG00000284697
		ENSG00000212601
		ENSG00000187942
		ENSG00000260022
		ENSG00000172548
		ENSG00000196420
		ENSG00000188785
		ENSG00000234942
		ENSG00000250156
		ENSG00000113070
		ENSG00000275441
		ENSG00000258168
		ENSG00000127129
		ENSG00000166825
		ENSG00000095932
		ENSG00000248738
		ENSG00000260899
		ENSG00000271369
		ENSG00000187144
		ENSG00000258691
		ENSG00000088726
		ENSG00000269097
		ENSG00000260542
		ENSG00000232912
		ENSG00000253670
		ENSG00000254258
		ENSG00000237525
		ENSG00000253372
		ENSG00000177614
		ENSG00000166396
		ENSG00000168427
		ENSG00000142910
		ENSG00000266537
		ENSG00000077984
		ENSG00000254718
		ENSG00000227391
		ENSG00000235361
		ENSG00000278908
		ENSG00000224731
		ENSG00000259969
		ENSG00000119630
		ENSG00000260253
		ENSG00000264031
		ENSG00000235763
		ENSG00000278482
		ENSG00000138623
		ENSG00000222035
		ENSG00000241808
		ENSG00000261394
		ENSG00000102886
		ENSG00000236643
		ENSG00000276350
		ENSG00000244040
		ENSG00000257612
		ENSG00000121314
		ENSG00000278276
		ENSG00000253547
		ENSG00000251660
		ENSG00000017427
		ENSG00000134830
		ENSG00000104237
		ENSG00000057657
		ENSG00000241356
		ENSG00000124557
		ENSG00000137814
		ENSG00000237982
		ENSG00000204706
		ENSG00000280270
		ENSG00000175600
		ENSG00000225420
		ENSG00000274833
		ENSG00000242242
		ENSG00000234534
		ENSG00000134716
		ENSG00000256443
		ENSG00000255060
		ENSG00000278419
		ENSG00000110324
		ENSG00000108442
		ENSG00000081181
		ENSG00000266549
		ENSG00000162692
		ENSG00000271937
		ENSG00000166923
		ENSG00000276786
		ENSG00000229689
		ENSG00000256001
		ENSG00000160886
		ENSG00000267455
		ENSG00000198003
		ENSG00000249669
		ENSG00000278636
		ENSG00000237783
		ENSG00000165204
		ENSG00000253408
		ENSG00000201569
		ENSG00000283265
		ENSG00000264954
		ENSG00000279261
		ENSG00000250425
		ENSG00000238290
		ENSG00000175202
		ENSG00000236114
		ENSG00000170290
		ENSG00000175267
		ENSG00000253087
		ENSG00000256713
		ENSG00000255572
		ENSG00000266642
		ENSG00000242041
		ENSG00000284617
		ENSG00000262020
		ENSG00000261696
		ENSG00000259441
		ENSG00000189052
		ENSG00000201959
		ENSG00000282041
		ENSG00000272347
		ENSG00000234817
		ENSG00000267712
		ENSG00000155026
		ENSG00000256980
		ENSG00000233708
		ENSG00000230305
		ENSG00000154734
		ENSG00000188779
		ENSG00000206922
[truncated: 4,971 more rows]

## Sheet: C_VennDiagramInput
ens_id	tx
ENSG00000176826	Down_0.25_8h
ENSG00000276612	Down_0.25_8h
ENSG00000231369	Down_0.25_8h
ENSG00000213588	Down_0.25_8h
ENSG00000283117	Down_0.25_8h
ENSG00000261796	Down_0.25_8h
ENSG00000243910	Down_0.25_8h
ENSG00000228110	Down_0.25_8h
ENSG00000267303	Down_0.25_8h
ENSG00000241111	Down_0.25_8h
ENSG00000273003	Down_0.25_8h
ENSG00000243721	Down_0.25_8h
ENSG00000228360	Down_0.25_8h
ENSG00000267022	Down_0.25_8h
ENSG00000256966	Down_0.25_8h
ENSG00000260482	Down_0.25_8h
ENSG00000266642	Down_0.25_8h
ENSG00000281348	Down_0.25_8h
ENSG00000270136	Down_0.25_8h
ENSG00000272601	Down_0.25_8h
ENSG00000010932	Down_0.25_8h
ENSG00000237897	Down_0.25_8h
ENSG00000145029	Down_0.25_8h
ENSG00000248121	Down_0.25_8h
ENSG00000197943	Down_0.25_8h
ENSG00000255524	Down_0.25_8h
ENSG00000283047	Down_0.25_8h
ENSG00000273628	Down_0.25_8h
ENSG00000232827	Down_0.25_8h
ENSG00000242515	Down_0.25_8h
ENSG00000165695	Down_0.25_8h
ENSG00000240021	Down_0.25_8h
ENSG00000273143	Down_0.25_8h
ENSG00000140465	Down_0.25_8h
ENSG00000234184	Down_0.25_8h
ENSG00000149435	Down_0.25_8h
ENSG00000260552	Down_0.25_8h
ENSG00000229083	Down_0.25_8h
ENSG00000248778	Down_0.25_8h
ENSG00000274049	Down_0.25_8h
ENSG00000227449	Down_0.25_8h
ENSG00000269578	Down_0.25_8h
ENSG00000256514	Down_0.25_8h
ENSG00000254416	Down_0.25_8h
ENSG00000216624	Down_0.25_8h
ENSG00000145002	Down_0.25_8h
ENSG00000164400	Down_0.25_8h
ENSG00000263105	Down_0.25_8h
ENSG00000232104	Down_0.25_8h
ENSG00000234185	Down_0.25_8h
ENSG00000234969	Down_0.25_8h
ENSG00000164825	Down_0.25_8h
ENSG00000264204	Down_0.25_8h
ENSG00000282246	Down_0.25_8h
ENSG00000260247	Down_0.25_8h
ENSG00000237979	Down_0.25_8h
ENSG00000249816	Down_0.25_8h
ENSG00000234817	Down_0.25_8h
ENSG00000234818	Down_0.25_8h
ENSG00000225362	Down_0.25_8h
ENSG00000166407	Down_0.25_8h
ENSG00000225680	Down_0.25_8h
ENSG00000213424	Down_0.25_8h
ENSG00000226102	Down_0.25_8h
ENSG00000225113	Down_0.25_8h
ENSG00000226981	Down_0.25_8h
ENSG00000203279	Down_0.25_8h
ENSG00000273253	Down_0.25_8h
ENSG00000129757	Down_0.25_8h
ENSG00000225528	Down_0.25_8h
ENSG00000264968	Down_0.25_8h
ENSG00000256377	Down_0.25_8h
ENSG00000280279	Down_0.25_8h
ENSG00000224533	Down_0.25_8h
ENSG00000280537	Down_0.25_8h
ENSG00000105649	Down_0.25_8h
ENSG00000105369	Down_0.25_8h
ENSG00000257918	Down_0.25_8h
ENSG00000215819	Down_0.25_8h
ENSG00000270672	Down_0.25_8h
ENSG00000233144	Down_0.25_8h
ENSG00000225255	Down_0.25_8h
ENSG00000283270	Down_0.25_8h
ENSG00000259844	Down_0.25_8h
ENSG00000163606	Down_0.25_8h
ENSG00000153902	Down_0.25_8h
ENSG00000250768	Down_0.25_8h
ENSG00000241641	Down_0.25_8h
ENSG00000258082	Down_0.25_8h
ENSG00000153563	Down_0.25_8h
ENSG00000163661	Down_0.25_8h
ENSG00000254477	Down_0.25_8h
ENSG00000099866	Down_0.25_8h
ENSG00000228153	Down_0.25_8h
ENSG00000127324	Down_0.25_8h
ENSG00000230835	Down_0.25_8h
ENSG00000250538	Down_0.25_8h
ENSG00000019991	Down_0.25_8h
ENSG00000245750	Down_0.25_8h
ENSG00000251393	Down_0.25_8h
ENSG00000229238	Down_0.25_8h
ENSG00000242073	Down_0.25_8h
ENSG00000249967	Down_0.25_8h
ENSG00000262668	Down_0.25_8h
ENSG00000132010	Down_0.25_8h
ENSG00000138792	Down_0.25_8h
ENSG00000146039	Down_0.25_8h
ENSG00000255670	Down_0.25_8h
ENSG00000090659	Down_0.25_8h
ENSG00000217159	Down_0.25_8h
ENSG00000168131	Down_0.25_8h
ENSG00000259399	Down_0.25_8h
ENSG00000249237	Down_0.25_8h
ENSG00000237911	Down_0.25_8h
ENSG00000232648	Down_0.25_8h
ENSG00000248358	Down_0.25_8h
ENSG00000223911	Down_0.25_8h
ENSG00000259024	Down_0.25_8h
ENSG00000232455	Down_0.25_8h
ENSG00000110944	Down_0.25_8h
ENSG00000224204	Down_0.25_8h
ENSG00000225214	Down_0.25_8h
ENSG00000237359	Down_0.25_8h
ENSG00000189372	Down_0.25_8h
ENSG00000269600	Down_0.25_8h
ENSG00000271503	Down_0.25_8h
ENSG00000149926	Down_0.25_8h
ENSG00000237807	Down_0.25_8h
ENSG00000140839	Down_0.25_8h
ENSG00000269934	Down_0.25_8h
ENSG00000124657	Down_0.25_8h
ENSG00000232586	Down_0.25_8h
ENSG00000237927	Down_0.25_8h
ENSG00000185523	Down_0.25_8h
ENSG00000261487	Down_0.25_8h
ENSG00000226526	Down_0.25_8h
ENSG00000248367	Down_0.25_8h
ENSG00000213976	Down_0.25_8h
ENSG00000225083	Down_0.25_8h
ENSG00000274253	Down_0.25_8h
ENSG00000253404	Down_0.25_8h
ENSG00000232706	Down_0.25_8h
ENSG00000232412	Down_0.25_8h
ENSG00000268583	Down_0.25_8h
ENSG00000245598	Down_0.25_8h
ENSG00000272485	Down_0.25_8h
ENSG00000168843	Down_0.25_8h
ENSG00000205022	Down_0.25_8h
ENSG00000237976	Down_0.25_8h
ENSG00000237063	Down_0.25_8h
ENSG00000170523	Down_0.25_8h
ENSG00000189377	Down_0.25_8h
ENSG00000128918	Down_0.25_8h
ENSG00000260896	Down_0.25_8h
ENSG00000123342	Down_0.25_8h
ENSG00000093072	Down_0.25_8h
ENSG00000267653	Down_0.25_8h
ENSG00000214870	Down_0.25_8h
ENSG00000232909	Down_0.25_8h
ENSG00000240449	Down_0.25_8h
ENSG00000179044	Down_0.25_8h
ENSG00000117400	Down_0.25_8h
ENSG00000273828	Down_0.25_8h
ENSG00000235785	Down_0.25_8h
ENSG00000164007	Down_0.25_8h
ENSG00000231903	Down_0.25_8h
ENSG00000164411	Down_0.25_8h
ENSG00000248159	Down_0.25_8h
ENSG00000232352	Down_0.25_8h
ENSG00000092051	Down_0.25_8h
ENSG00000216938	Down_0.25_8h
ENSG00000255343	Down_0.25_8h
ENSG00000128645	Down_0.25_8h
ENSG00000263311	Down_0.25_8h
ENSG00000259941	Down_0.25_8h
ENSG00000226853	Down_0.25_8h
ENSG00000250634	Down_0.25_8h
ENSG00000112212	Down_0.25_8h
ENSG00000236427	Down_0.25_8h
ENSG00000237548	Down_0.25_8h
ENSG00000276092	Down_0.25_8h
ENSG00000249131	Down_0.25_8h
ENSG00000204099	Down_0.25_8h
ENSG00000226122	Down_0.25_8h
ENSG00000125975	Down_0.25_8h
ENSG00000229622	Down_0.25_8h
ENSG00000231210	Down_0.25_8h
ENSG00000175538	Down_0.25_8h
ENSG00000272666	Down_0.25_8h
ENSG00000261595	Down_0.25_8h
ENSG00000187242	Down_0.25_8h
ENSG00000269191	Down_0.25_8h
ENSG00000248429	Down_0.25_8h
ENSG00000173662	Down_0.25_8h
ENSG00000205704	Down_0.25_8h
ENSG00000074706	Down_0.25_8h
ENSG00000196361	Down_0.25_8h
ENSG00000109667	Down_0.25_8h
ENSG00000259762	Down_0.25_8h
ENSG00000137285	Down_0.25_8h
ENSG00000215630	Down_0.25_8h
ENSG00000181904	Down_0.25_8h
ENSG00000196420	Down_0.25_8h
ENSG00000283392	Down_0.25_8h
ENSG00000159208	Down_0.25_8h
ENSG00000170324	Down_0.25_8h
ENSG00000253981	Down_0.25_8h
ENSG00000233263	Down_0.25_8h
ENSG00000225956	Down_0.25_8h
ENSG00000272741	Down_0.25_8h
ENSG00000236577	Down_0.25_8h
ENSG00000228028	Down_0.25_8h
ENSG00000244932	Down_0.25_8h
ENSG00000270104	Down_0.25_8h
ENSG00000236861	Down_0.25_8h
ENSG00000245648	Down_0.25_8h
ENSG00000129451	Down_0.25_8h
ENSG00000224429	Down_0.25_8h
ENSG00000230679	Down_0.25_8h
ENSG00000284071	Down_0.25_8h
ENSG00000284380	Down_0.25_8h
ENSG00000214814	Down_0.25_8h
ENSG00000185955	Down_0.25_8h
ENSG00000249085	Down_0.25_8h
ENSG00000226577	Down_0.25_8h
ENSG00000206889	Down_0.25_8h
ENSG00000144035	Down_0.25_8h
ENSG00000240057	Down_0.25_8h
ENSG00000268678	Down_0.25_8h
ENSG00000247877	Down_0.25_8h
ENSG00000173947	Down_0.25_8h
ENSG00000183346	Down_0.25_8h
ENSG00000197083	Down_0.25_8h
ENSG00000248079	Down_0.25_8h
ENSG00000241825	Down_0.25_8h
ENSG00000255052	Down_0.25_8h
ENSG00000271392	Down_0.25_8h
ENSG00000243220	Down_0.25_8h
ENSG00000268204	Down_0.25_8h
ENSG00000057593	Down_0.25_8h
ENSG00000223635	Down_0.25_8h
ENSG00000163501	Down_0.25_8h
ENSG00000250482	Down_0.25_8h
ENSG00000204610	Down_0.25_8h
ENSG00000237352	Down_0.25_8h
ENSG00000270880	Down_0.25_8h
ENSG00000228703	Down_0.25_8h
ENSG00000196172	Down_0.25_8h
ENSG00000222370	Down_0.25_8h
ENSG00000251216	Down_0.25_8h
ENSG00000276087	Down_0.25_8h
ENSG00000226960	Down_0.25_8h
ENSG00000135898	Down_0.25_8h
ENSG00000276251	Down_0.25_8h
ENSG00000204117	Down_0.25_8h
ENSG00000171505	Down_0.25_8h
ENSG00000260996	Down_0.25_8h
ENSG00000250808	Down_0.25_8h
ENSG00000230321	Down_0.25_8h
ENSG00000253013	Down_0.25_8h
ENSG00000102755	Down_0.25_8h
ENSG00000250815	Down_0.25_8h
ENSG00000251544	Down_0.25_8h
ENSG00000274372	Down_0.25_8h
ENSG00000164651	Down_0.25_8h
ENSG00000278313	Down_0.25_8h
ENSG00000124205	Down_0.25_8h
ENSG00000115361	Down_0.25_8h
ENSG00000255508	Down_0.25_8h
ENSG00000269482	Down_0.25_8h
ENSG00000254501	Down_0.25_8h
ENSG00000231851	Down_0.25_8h
ENSG00000259648	Down_0.25_8h
ENSG00000161149	Down_0.25_8h
ENSG00000213793	Down_0.25_8h
ENSG00000218565	Down_0.25_8h
ENSG00000241818	Down_0.25_8h
ENSG00000170231	Down_0.25_8h
ENSG00000107295	Down_0.25_8h
ENSG00000228022	Down_0.25_8h
ENSG00000233033	Down_0.25_8h
ENSG00000188779	Down_0.25_8h
ENSG00000108798	Down_0.25_8h
ENSG00000204532	Down_0.25_8h
ENSG00000234382	Down_0.25_8h
ENSG00000206159	Down_0.25_8h
ENSG00000141469	Down_0.25_8h
ENSG00000253175	Down_0.25_8h
ENSG00000149599	Down_0.25_8h
ENSG00000228208	Down_0.25_8h
ENSG00000250409	Down_0.25_8h
ENSG00000230741	Down_0.25_8h
ENSG00000177138	Down_0.25_8h
ENSG00000228010	Down_0.25_8h
ENSG00000234050	Down_0.25_8h
ENSG00000235575	Down_0.25_8h
ENSG00000254028	Down_0.25_8h
ENSG00000230415	Down_0.25_8h
ENSG00000229739	Down_0.25_8h
ENSG00000227848	Down_0.25_8h
ENSG00000255045	Down_0.25_8h
ENSG00000224050	Down_0.25_8h
ENSG00000246214	Down_0.25_8h
ENSG00000121351	Down_0.25_8h
ENSG00000197497	Down_0.25_8h
ENSG00000233221	Down_0.25_8h
ENSG00000206113	Down_0.25_8h
ENSG00000234689	Down_0.25_8h
ENSG00000240253	Down_0.25_8h
ENSG00000272934	Down_0.25_8h
ENSG00000131721	Down_0.25_8h
ENSG00000196427	Down_0.25_8h
ENSG00000257769	Down_0.25_8h
ENSG00000177301	Down_0.25_8h
ENSG00000223519	Down_0.25_8h
ENSG00000255507	Down_0.25_8h
ENSG00000284641	Down_0.25_8h
ENSG00000268104	Down_0.25_8h
ENSG00000078053	Down_0.25_8h
ENSG00000165182	Down_0.25_8h
ENSG00000256742	Down_0.25_8h
ENSG00000110002	Down_0.25_8h
ENSG00000183248	Down_0.25_8h
ENSG00000042832	Down_0.25_8h
ENSG00000227617	Down_0.25_8h
ENSG00000253582	Down_0.25_8h
ENSG00000128218	Down_0.25_8h
ENSG00000229676	Down_0.25_8h
ENSG00000197249	Down_0.25_8h
ENSG00000264520	Down_0.25_8h
ENSG00000258292	Down_0.25_8h
ENSG00000278206	Down_0.25_8h
ENSG00000261385	Down_0.25_8h
ENSG00000270059	Down_0.25_8h
ENSG00000283897	Down_0.25_8h
ENSG00000226249	Down_0.25_8h
ENSG00000277351	Down_0.25_8h
ENSG00000201077	Down_0.25_8h
ENSG00000266775	Down_0.25_8h
ENSG00000196209	Down_0.25_8h
ENSG00000151025	Down_0.25_8h
ENSG00000237440	Down_0.25_8h
ENSG00000239527	Down_0.25_8h
ENSG00000167046	Down_0.25_8h
ENSG00000273209	Down_0.25_8h
ENSG00000254119	Down_0.25_8h
ENSG00000127954	Down_0.25_8h
ENSG00000237276	Down_0.25_8h
ENSG00000227788	Down_0.25_8h
ENSG00000201689	Down_0.25_8h
ENSG00000277352	Down_0.25_8h
ENSG00000259883	Down_0.25_8h
ENSG00000182040	Down_0.25_8h
ENSG00000275438	Down_0.25_8h
ENSG00000277809	Down_0.25_8h
ENSG00000257364	Down_0.25_8h
ENSG00000276740	Down_0.25_8h
ENSG00000207756	Down_0.25_8h
ENSG00000227432	Down_0.25_8h
ENSG00000250208	Down_0.25_8h
ENSG00000270540	Down_0.25_8h
ENSG00000179055	Down_0.25_8h
ENSG00000227563	Down_0.25_8h
ENSG00000256589	Down_0.25_8h
ENSG00000241886	Down_0.25_8h
ENSG00000260515	Down_0.25_8h
ENSG00000270394	Down_0.25_8h
ENSG00000251957	Down_0.25_8h
ENSG00000189233	Down_0.25_8h
ENSG00000251054	Down_0.25_8h
ENSG00000226883	Down_0.25_8h
ENSG00000242529	Down_0.25_8h
ENSG00000132681	Down_0.25_8h
ENSG00000149646	Down_0.25_8h
ENSG00000258334	Down_0.25_8h
ENSG00000267141	Down_0.25_8h
ENSG00000205517	Down_0.25_8h
ENSG00000258461	Down_0.25_8h
ENSG00000250021	Down_0.25_8h
ENSG00000253263	Down_0.25_8h
ENSG00000255992	Down_0.25_8h
ENSG00000253824	Down_0.25_8h
ENSG00000266010	Down_0.25_8h
ENSG00000284057	Down_0.25_8h
ENSG00000101074	Down_0.25_8h
ENSG00000225493	Down_0.25_8h
ENSG00000107317	Down_0.25_8h
ENSG00000235885	Down_0.25_8h
ENSG00000267717	Down_0.25_8h
ENSG00000173862	Down_0.25_8h
ENSG00000261293	Down_0.25_8h
ENSG00000227001	Down_0.25_8h
ENSG00000229766	Down_0.25_8h
ENSG00000206557	Down_0.25_8h
ENSG00000253917	Down_0.25_8h
ENSG00000163106	Down_0.25_8h
ENSG00000142609	Down_0.25_8h
ENSG00000269053	Down_0.25_8h
ENSG00000254445	Down_0.25_8h
ENSG00000230392	Down_0.25_8h
ENSG00000125816	Down_0.25_8h
ENSG00000258558	Down_0.25_8h
ENSG00000228086	Down_0.25_8h
ENSG00000276170	Down_0.25_8h
ENSG00000266313	Down_0.25_8h
ENSG00000242852	Down_0.25_8h
ENSG00000187944	Down_0.25_8h
ENSG00000160229	Down_0.25_8h
ENSG00000134258	Down_0.25_8h
ENSG00000259138	Down_0.25_8h
ENSG00000250234	Down_0.25_8h
ENSG00000222778	Down_0.25_8h
ENSG00000246528	Down_0.25_8h
ENSG00000259036	Down_0.25_8h
ENSG00000214872	Down_0.25_8h
ENSG00000273507	Down_0.25_8h
ENSG00000204044	Down_0.25_8h
ENSG00000223843	Down_0.25_8h
ENSG00000145384	Down_0.25_8h
ENSG00000128652	Down_0.25_8h
ENSG00000239556	Down_0.25_8h
ENSG00000273063	Down_0.25_8h
ENSG00000269300	Down_0.25_8h
ENSG00000250906	Down_0.25_8h
ENSG00000188958	Down_0.25_8h
ENSG00000100985	Down_0.25_8h
ENSG00000234890	Down_0.25_8h
ENSG00000225945	Down_0.25_8h
ENSG00000235997	Down_0.25_8h
ENSG00000073734	Down_0.25_8h
ENSG00000224965	Down_0.25_8h
ENSG00000253504	Down_0.25_8h
ENSG00000115165	Down_0.25_8h
ENSG00000225914	Down_0.25_8h
ENSG00000233847	Down_0.25_8h
ENSG00000236494	Down_0.25_8h
ENSG00000184697	Down_0.25_8h
ENSG00000258658	Down_0.25_8h
ENSG00000250900	Down_0.25_8h
ENSG00000229142	Down_0.25_8h
ENSG00000179873	Down_0.25_8h
ENSG00000197253	Down_0.25_8h
ENSG00000095713	Down_0.25_8h
ENSG00000257660	Down_0.25_8h
ENSG00000229873	Down_0.25_8h
ENSG00000178078	Down_0.25_8h
ENSG00000137745	Down_0.25_8h
ENSG00000163239	Down_0.25_8h
ENSG00000260413	Down_0.25_8h
ENSG00000164344	Down_0.25_8h
ENSG00000255467	Down_0.25_8h
ENSG00000184106	Down_0.25_8h
ENSG00000161132	Down_0.25_8h
ENSG00000233828	Down_0.25_8h
ENSG00000101323	Down_0.25_8h
ENSG00000102145	Down_0.25_8h
ENSG00000164761	Down_0.25_8h
ENSG00000261649	Down_0.25_8h
ENSG00000204136	Down_0.25_8h
ENSG00000260941	Down_0.25_8h
ENSG00000267241	Down_0.25_8h
ENSG00000184276	Down_0.25_8h
ENSG00000259982	Down_0.25_8h
ENSG00000244061	Down_0.25_8h
ENSG00000221496	Down_0.25_8h
ENSG00000213512	Down_0.25_8h
ENSG00000205111	Down_0.25_8h
ENSG00000231858	Down_0.25_8h
ENSG00000133687	Down_0.25_8h
ENSG00000274560	Down_0.25_8h
ENSG00000225376	Down_0.25_8h
ENSG00000121053	Down_0.25_8h
ENSG00000109927	Down_0.25_8h
ENSG00000131831	Down_0.25_8h
ENSG00000235293	Down_0.25_8h
ENSG00000225082	Down_0.25_8h
ENSG00000236463	Down_0.25_8h
ENSG00000242925	Down_0.25_8h
ENSG00000233411	Down_0.25_8h
ENSG00000112077	Down_0.25_8h
ENSG00000242507	Down_0.25_8h
ENSG00000155066	Down_0.25_8h
ENSG00000280270	Down_0.25_8h
ENSG00000226386	Down_0.25_8h
ENSG00000149043	Down_0.25_8h
ENSG00000152463	Down_0.25_8h
ENSG00000189134	Down_0.25_8h
ENSG00000233708	Down_0.25_8h
ENSG00000279933	Down_0.25_8h
ENSG00000109832	Down_0.25_8h
ENSG00000241808	Down_0.25_8h
ENSG00000205293	Down_0.25_8h
ENSG00000264315	Down_0.25_8h
ENSG00000054179	Down_0.25_8h
ENSG00000231198	Down_0.25_8h
ENSG00000226912	Down_0.25_8h
ENSG00000125522	Down_0.25_8h
ENSG00000241879	Down_0.25_8h
ENSG00000266307	Down_0.25_8h
ENSG00000235482	Down_0.25_8h
ENSG00000258611	Down_0.25_8h
ENSG00000221033	Down_0.25_8h
ENSG00000226297	Down_0.25_8h
ENSG00000174667	Down_0.25_8h
ENSG00000229191	Down_0.25_8h
ENSG00000265694	Down_0.25_8h
ENSG00000236878	Down_0.25_8h
ENSG00000207022	Down_0.25_8h
ENSG00000199201	Down_0.25_8h
ENSG00000244281	Down_0.25_8h
ENSG00000207983	Down_0.25_8h
ENSG00000277764	Down_0.25_8h
ENSG00000227730	Down_0.25_8h
ENSG00000274017	Down_0.25_8h
ENSG00000252847	Down_0.25_8h
ENSG00000199643	Down_0.25_8h
ENSG00000200885	Down_0.25_8h
ENSG00000274670	Down_0.25_8h
ENSG00000163098	Down_0.25_8h
ENSG00000204006	Down_0.25_8h
ENSG00000231483	Down_0.25_8h
ENSG00000276514	Down_0.25_8h
ENSG00000179141	Down_0.25_8h
ENSG00000279859	Down_0.25_8h
ENSG00000279300	Down_0.25_8h
ENSG00000261757	Down_0.25_8h
ENSG00000253872	Down_0.25_8h
ENSG00000271930	Down_0.25_8h
ENSG00000259521	Down_0.25_8h
ENSG00000248895	Down_0.25_8h
ENSG00000253500	Down_0.25_8h
ENSG00000267277	Down_0.25_8h
ENSG00000263744	Down_0.25_8h
ENSG00000257900	Down_0.25_8h
ENSG00000279431	Down_0.25_8h
ENSG00000257231	Down_0.25_8h
ENSG00000149735	Down_0.25_8h
ENSG00000258311	Down_0.25_8h
ENSG00000243414	Down_0.25_8h
ENSG00000133256	Down_0.25_8h
ENSG00000105289	Down_0.25_8h
ENSG00000231967	Down_0.25_8h
ENSG00000254099	Down_0.25_8h
ENSG00000179774	Down_0.25_8h
ENSG00000089847	Down_0.25_8h
ENSG00000264294	Down_0.25_8h
ENSG00000276965	Down_0.25_8h
ENSG00000257379	Down_0.25_8h
ENSG00000270106	Down_0.25_8h
ENSG00000110852	Down_0.25_8h
ENSG00000213886	Down_0.25_8h
ENSG00000197816	Down_0.25_8h
ENSG00000251381	Down_0.25_8h
ENSG00000264954	Down_0.25_8h
ENSG00000101605	Down_0.25_8h
ENSG00000198788	Down_0.25_8h
ENSG00000153930	Down_0.25_8h
ENSG00000214402	Down_0.25_8h
ENSG00000133477	Down_0.25_8h
ENSG00000238280	Down_0.25_8h
ENSG00000114455	Down_0.25_8h
ENSG00000272265	Down_0.25_8h
ENSG00000171840	Down_0.25_8h
ENSG00000242390	Down_0.25_8h
ENSG00000254452	Down_0.25_8h
ENSG00000233848	Down_0.25_8h
ENSG00000273077	Down_0.25_8h
ENSG00000262881	Down_0.25_8h
ENSG00000253408	Down_0.25_8h
ENSG00000126947	Down_0.25_8h
ENSG00000100024	Down_0.25_8h
ENSG00000089101	Down_0.25_8h
ENSG00000255401	Down_0.25_8h
ENSG00000228350	Down_0.25_8h
ENSG00000172460	Down_0.25_8h
ENSG00000278146	Down_0.25_8h
ENSG00000275358	Down_0.25_8h
ENSG00000232459	Down_0.25_8h
ENSG00000126010	Down_0.25_8h
ENSG00000211695	Down_0.25_8h
ENSG00000201483	Down_0.25_8h
ENSG00000170989	Down_0.25_8h
ENSG00000139515	Down_0.25_8h
ENSG00000185271	Down_0.25_8h
ENSG00000259504	Down_0.25_8h
ENSG00000014257	Down_0.25_8h
ENSG00000258586	Down_0.25_8h
ENSG00000259432	Down_0.25_8h
ENSG00000185742	Down_0.25_8h
ENSG00000231334	Down_0.25_8h
ENSG00000283247	Down_0.25_8h
ENSG00000267669	Down_0.25_8h
ENSG00000270243	Down_0.25_8h
ENSG00000126233	Down_0.25_8h
ENSG00000170827	Down_0.25_8h
ENSG00000239828	Down_0.25_8h
ENSG00000255440	Down_0.25_8h
ENSG00000225062	Down_0.25_8h
ENSG00000105609	Down_0.25_8h
ENSG00000249584	Down_0.25_8h
ENSG00000174807	Down_0.25_8h
ENSG00000274751	Down_0.25_8h
ENSG00000278914	Down_0.25_8h
ENSG00000206592	Down_0.25_8h
ENSG00000256011	Down_0.25_8h
ENSG00000236538	Down_0.25_8h
ENSG00000223620	Down_0.25_8h
ENSG00000070601	Down_0.25_8h
ENSG00000228670	Down_0.25_8h
ENSG00000254151	Down_0.25_8h
ENSG00000235295	Down_0.25_8h
ENSG00000183671	Down_0.25_8h
ENSG00000198221	Down_0.25_8h
ENSG00000164393	Down_0.25_8h
ENSG00000229120	Down_0.25_8h
ENSG00000129244	Down_0.25_8h
ENSG00000256817	Down_0.25_8h
ENSG00000244694	Down_0.25_8h
ENSG00000198857	Down_0.25_8h
ENSG00000183837	Down_0.25_8h
ENSG00000166145	Down_0.25_8h
ENSG00000154928	Down_0.25_8h
ENSG00000251687	Down_0.25_8h
ENSG00000173376	Down_0.25_8h
ENSG00000238650	Down_0.25_8h
ENSG00000224982	Down_0.25_8h
ENSG00000265948	Down_0.25_8h
ENSG00000227078	Down_0.25_8h
ENSG00000143341	Down_0.25_8h
ENSG00000162669	Down_0.25_8h
ENSG00000227017	Down_0.25_8h
ENSG00000177984	Down_0.25_8h
ENSG00000094963	Down_0.25_8h
ENSG00000254560	Down_0.25_8h
ENSG00000123405	Down_0.25_8h
ENSG00000102104	Down_0.25_8h
ENSG00000284719	Down_0.25_8h
ENSG00000009765	Down_0.25_8h
ENSG00000271825	Down_0.25_8h
ENSG00000232756	Down_0.25_8h
ENSG00000275119	Down_0.25_8h
ENSG00000248727	Down_0.25_8h
ENSG00000187037	Down_0.25_8h
ENSG00000039987	Down_0.25_8h
ENSG00000082929	Down_0.25_8h
ENSG00000187268	Down_0.25_8h
ENSG00000101331	Down_0.25_8h
ENSG00000107562	Down_0.25_8h
ENSG00000179133	Down_0.25_8h
ENSG00000256906	Down_0.25_8h
ENSG00000111913	Down_0.25_8h
ENSG00000254364	Down_0.25_8h
ENSG00000065371	Down_0.25_8h
ENSG00000196581	Down_0.25_8h
ENSG00000243729	Down_0.25_8h
ENSG00000268231	Down_0.25_8h
ENSG00000224647	Down_0.25_8h
ENSG00000166869	Down_0.25_8h
ENSG00000259281	Down_0.25_8h
ENSG00000240089	Down_0.25_8h
ENSG00000213996	Down_0.25_8h
ENSG00000248466	Down_0.25_8h
ENSG00000267065	Down_0.25_8h
ENSG00000136535	Down_0.25_8h
ENSG00000256625	Down_0.25_8h
ENSG00000224721	Down_0.25_8h
ENSG00000275162	Down_0.25_8h
ENSG00000237212	Down_0.25_8h
ENSG00000133878	Down_0.25_8h
ENSG00000133454	Down_0.25_8h
ENSG00000173253	Down_0.25_8h
ENSG00000170373	Down_0.25_8h
ENSG00000226856	Down_0.25_8h
ENSG00000137752	Down_0.25_8h
ENSG00000280236	Down_0.25_8h
ENSG00000243130	Down_0.25_8h
ENSG00000275572	Down_0.25_8h
ENSG00000224067	Down_0.25_8h
ENSG00000204928	Down_0.25_8h
ENSG00000259256	Down_0.25_8h
ENSG00000254451	Down_0.25_8h
ENSG00000264707	Down_0.25_8h
ENSG00000118308	Down_0.25_8h
ENSG00000262079	Down_0.25_8h
ENSG00000254636	Down_0.25_8h
ENSG00000230424	Down_0.25_8h
ENSG00000269694	Down_0.25_8h
ENSG00000131435	Down_0.25_8h
ENSG00000113302	Down_0.25_8h
ENSG00000248713	Down_0.25_8h
ENSG00000122852	Down_0.25_8h
ENSG00000164691	Down_0.25_8h
ENSG00000267388	Down_0.25_8h
ENSG00000256811	Down_0.25_8h
ENSG00000226925	Down_0.25_8h
ENSG00000224920	Down_0.25_8h
ENSG00000124302	Down_0.25_8h
ENSG00000253224	Down_0.25_8h
ENSG00000198574	Down_0.25_8h
ENSG00000228695	Down_0.25_8h
ENSG00000253508	Down_0.25_8h
ENSG00000169194	Down_0.25_8h
ENSG00000233775	Down_0.25_8h
ENSG00000254887	Down_0.25_8h
ENSG00000229484	Down_0.25_8h
ENSG00000169442	Down_0.25_8h
ENSG00000145692	Down_0.25_8h
ENSG00000232542	Down_0.25_8h
ENSG00000233926	Down_0.25_8h
ENSG00000229380	Down_0.25_8h
ENSG00000275747	Down_0.25_8h
ENSG00000235911	Down_0.25_8h
ENSG00000248607	Down_0.25_8h
ENSG00000254980	Down_0.25_8h
ENSG00000233694	Down_0.25_8h
ENSG00000223302	Down_0.25_8h
ENSG00000197308	Down_0.25_8h
ENSG00000223485	Down_0.25_8h
ENSG00000215217	Down_0.25_8h
ENSG00000239586	Down_0.25_8h
ENSG00000272865	Down_0.25_8h
ENSG00000260995	Down_0.25_8h
ENSG00000251468	Down_0.25_8h
ENSG00000184188	Down_0.25_8h
ENSG00000226313	Down_0.25_8h
ENSG00000205361	Down_0.25_8h
ENSG00000283174	Down_0.25_8h
ENSG00000254647	Down_0.25_8h
ENSG00000168004	Down_0.25_8h
ENSG00000232810	Down_0.25_8h
ENSG00000235015	Down_0.25_8h
ENSG00000273956	Down_0.25_8h
ENSG00000270441	Down_0.25_8h
ENSG00000264138	Down_0.25_8h
ENSG00000283885	Down_0.25_8h
ENSG00000275002	Down_0.25_8h
ENSG00000240045	Down_0.25_8h
ENSG00000227165	Down_0.25_8h
ENSG00000227060	Down_0.25_8h
ENSG00000259008	Down_0.25_8h
ENSG00000135502	Down_0.25_8h
ENSG00000258428	Down_0.25_8h
ENSG00000233791	Down_0.25_8h
ENSG00000148826	Down_0.25_8h
ENSG00000139656	Down_0.25_8h
ENSG00000270765	Down_0.25_8h
ENSG00000167360	Down_0.25_8h
ENSG00000243284	Down_0.25_8h
ENSG00000103710	Down_0.25_8h
ENSG00000236806	Down_0.25_8h
ENSG00000108825	Down_0.25_8h
ENSG00000252084	Down_0.25_8h
ENSG00000233849	Down_0.25_8h
ENSG00000284743	Down_0.25_8h
ENSG00000157654	Down_0.25_8h
ENSG00000252496	Down_0.25_8h
ENSG00000277411	Down_0.25_8h
ENSG00000207736	Down_0.25_8h
ENSG00000199469	Down_0.25_8h
ENSG00000278464	Down_0.25_8h
ENSG00000169906	Down_0.25_8h
ENSG00000199107	Down_0.25_8h
ENSG00000187902	Down_0.25_8h
ENSG00000235267	Down_0.25_8h
ENSG00000257146	Down_0.25_8h
ENSG00000120088	Down_0.25_8h
ENSG00000232354	Down_0.25_8h
ENSG00000267778	Down_0.25_8h
ENSG00000247199	Down_0.25_8h
ENSG00000237851	Down_0.25_8h
ENSG00000253490	Down_0.25_8h
ENSG00000100170	Down_0.25_8h
ENSG00000115138	Down_0.25_8h
ENSG00000259502	Down_0.25_8h
ENSG00000262223	Down_0.25_8h
ENSG00000233217	Down_0.25_8h
ENSG00000271913	Down_0.25_8h
ENSG00000165511	Down_0.25_8h
ENSG00000197769	Down_0.25_8h
ENSG00000248172	Down_0.25_8h
ENSG00000204385	Down_0.25_8h
ENSG00000189409	Down_0.25_8h
ENSG00000248109	Down_0.25_8h
ENSG00000160883	Down_0.25_8h
ENSG00000236700	Down_0.25_8h
ENSG00000251350	Down_0.25_8h
ENSG00000248596	Down_0.25_8h
ENSG00000232579	Down_0.25_8h
ENSG00000258386	Down_0.25_8h
ENSG00000131910	Down_0.25_8h
ENSG00000130643	Down_0.25_8h
ENSG00000284237	Down_0.25_8h
ENSG00000232306	Down_0.25_8h
ENSG00000205890	Down_0.25_8h
ENSG00000253317	Down_0.25_8h
ENSG00000226149	Down_0.25_8h
ENSG00000257183	Down_0.25_8h
ENSG00000219150	Down_0.25_8h
ENSG00000225411	Down_0.25_8h
ENSG00000104415	Down_0.25_8h
ENSG00000251191	Down_0.25_8h
ENSG00000231170	Down_0.25_8h
ENSG00000259359	Down_0.25_8h
ENSG00000273199	Down_0.25_8h
ENSG00000254862	Down_0.25_8h
ENSG00000207355	Down_0.25_8h
ENSG00000274114	Down_0.25_8h
ENSG00000256892	Down_0.25_8h
ENSG00000212517	Down_0.25_8h
ENSG00000132874	Down_0.25_8h
ENSG00000253334	Down_0.25_8h
ENSG00000165084	Down_0.25_8h
ENSG00000251830	Down_0.25_8h
ENSG00000244380	Down_0.25_8h
ENSG00000242707	Down_0.25_8h
ENSG00000131233	Down_0.25_8h
ENSG00000012504	Down_0.25_8h
ENSG00000250158	Down_0.25_8h
ENSG00000259871	Down_0.25_8h
ENSG00000242014	Down_0.25_8h
ENSG00000259346	Down_0.25_8h
ENSG00000213988	Down_0.25_8h
ENSG00000233968	Down_0.25_8h
ENSG00000183166	Down_0.25_8h
ENSG00000212520	Down_0.25_8h
ENSG00000242837	Down_0.25_8h
ENSG00000202144	Down_0.25_8h
ENSG00000266423	Down_0.25_8h
ENSG00000255490	Down_0.25_8h
ENSG00000241527	Down_0.25_8h
ENSG00000236741	Down_0.25_8h
ENSG00000278498	Down_0.25_8h
ENSG00000224667	Down_0.25_8h
ENSG00000120498	Down_0.25_8h
ENSG00000221525	Down_0.25_8h
ENSG00000248547	Down_0.25_8h
ENSG00000212207	Down_0.25_8h
ENSG00000201746	Down_0.25_8h
ENSG00000284242	Down_0.25_8h
ENSG00000243797	Down_0.25_8h
ENSG00000165059	Down_0.25_8h
ENSG00000274330	Down_0.25_8h
ENSG00000272343	Down_0.25_8h
ENSG00000200756	Down_0.25_8h
ENSG00000126733	Down_0.25_8h
ENSG00000259833	Down_0.25_8h
ENSG00000120337	Down_0.25_8h
ENSG00000234175	Down_0.25_8h
ENSG00000231404	Down_0.25_8h
ENSG00000242795	Down_0.25_8h
ENSG00000119660	Down_0.25_8h
ENSG00000271043	Down_0.25_8h
ENSG00000255910	Down_0.25_8h
ENSG00000222578	Down_0.25_8h
ENSG00000255377	Down_0.25_8h
ENSG00000224674	Down_0.25_8h
ENSG00000233646	Down_0.25_8h
ENSG00000226726	Down_0.25_8h
ENSG00000252046	Down_0.25_8h
ENSG00000213726	Down_0.25_8h
ENSG00000206014	Down_0.25_8h
ENSG00000279756	Down_0.25_8h
ENSG00000258774	Down_0.25_8h
ENSG00000185863	Down_0.25_8h
ENSG00000238190	Down_0.25_8h
ENSG00000268681	Down_0.25_8h
ENSG00000236503	Down_0.25_8h
ENSG00000241354	Down_0.25_8h
ENSG00000216179	Down_0.25_8h
ENSG00000257458	Down_0.25_8h
ENSG00000273313	Down_0.25_8h
ENSG00000265083	Down_0.25_8h
ENSG00000284167	Down_0.25_8h
ENSG00000255391	Down_0.25_8h
ENSG00000254888	Down_0.25_8h
ENSG00000224683	Down_0.25_8h
ENSG00000283845	Down_0.25_8h
ENSG00000258644	Down_0.25_8h
ENSG00000185634	Down_0.25_8h
ENSG00000236662	Down_0.25_8h
ENSG00000243406	Down_0.25_8h
ENSG00000217041	Down_0.25_8h
ENSG00000272829	Down_0.25_8h
ENSG00000170909	Down_0.25_8h
ENSG00000236914	Down_0.25_8h
ENSG00000253116	Down_0.25_8h
ENSG00000231063	Down_0.25_8h
ENSG00000200623	Down_0.25_8h
ENSG00000231305	Down_0.25_8h
ENSG00000223254	Down_0.25_8h
ENSG00000265213	Down_0.25_8h
ENSG00000233058	Down_0.25_8h
ENSG00000231817	Down_0.25_8h
ENSG00000275453	Down_0.25_8h
ENSG00000255104	Down_0.25_8h
ENSG00000214049	Down_0.25_8h
ENSG00000270996	Down_0.25_8h
ENSG00000202034	Down_0.25_8h
ENSG00000200113	Down_0.25_8h
ENSG00000146250	Down_0.25_8h
ENSG00000274021	Down_0.25_8h
ENSG00000272478	Down_0.25_8h
ENSG00000272514	Down_0.25_8h
ENSG00000105967	Down_0.25_8h
ENSG00000242764	Down_0.25_8h
ENSG00000248690	Down_0.25_8h
ENSG00000172794	Down_0.25_8h
ENSG00000271425	Down_0.25_8h
ENSG00000188783	Down_0.25_8h
ENSG00000272971	Down_0.25_8h
ENSG00000233225	Down_0.25_8h
ENSG00000271797	Down_0.25_8h
ENSG00000281383	Down_0.25_8h
ENSG00000255398	Down_0.25_8h
ENSG00000227155	Down_0.25_8h
ENSG00000012779	Down_0.25_8h
ENSG00000255020	Down_0.25_8h
ENSG00000166523	Down_0.25_8h
ENSG00000261147	Down_0.25_8h
ENSG00000271868	Down_0.25_8h
ENSG00000238795	Down_0.25_8h
ENSG00000275562	Down_0.25_8h
ENSG00000243501	Down_0.25_8h
ENSG00000215018	Down_0.25_8h
ENSG00000281181	Down_0.25_8h
ENSG00000280800	Down_0.25_8h
ENSG00000280614	Down_0.25_8h
ENSG00000172361	Down_0.25_8h
ENSG00000276673	Down_0.25_8h
ENSG00000196620	Down_0.25_8h
ENSG00000124568	Down_0.25_8h
ENSG00000171747	Down_0.25_8h
ENSG00000258867	Down_0.25_8h
ENSG00000271793	Down_0.25_8h
ENSG00000284716	Down_0.25_8h
ENSG00000163075	Down_0.25_8h
ENSG00000249396	Down_0.25_8h
ENSG00000175600	Down_0.25_8h
ENSG00000266668	Down_0.25_8h
ENSG00000267283	Down_0.25_8h
ENSG00000219891	Down_0.25_8h
ENSG00000226272	Down_0.25_8h
ENSG00000128253	Down_0.25_8h
ENSG00000280276	Down_0.25_8h
ENSG00000253356	Down_0.25_8h
ENSG00000162194	Down_0.25_8h
ENSG00000144057	Down_0.25_8h
ENSG00000196639	Down_0.25_8h
ENSG00000254248	Down_0.25_8h
ENSG00000229423	Down_0.25_8h
ENSG00000201451	Down_0.25_8h
ENSG00000279480	Down_0.25_8h
ENSG00000252757	Down_0.25_8h
ENSG00000272823	Down_0.25_8h
ENSG00000239128	Down_0.25_8h
ENSG00000222635	Down_0.25_8h
ENSG00000173810	Down_0.25_8h
ENSG00000221493	Down_0.25_8h
ENSG00000206869	Down_0.25_8h
ENSG00000258290	Down_0.25_8h
ENSG00000200201	Down_0.25_8h
ENSG00000278852	Down_0.25_8h
ENSG00000240669	Down_0.25_8h
ENSG00000235002	Down_0.25_8h
ENSG00000274400	Down_0.25_8h
ENSG00000200235	Down_0.25_8h
ENSG00000275154	Down_0.25_8h
ENSG00000279118	Down_0.25_8h
ENSG00000233702	Down_0.25_8h
ENSG00000281831	Down_0.25_8h
ENSG00000232735	Down_0.25_8h
ENSG00000271142	Down_0.25_8h
ENSG00000266151	Down_0.25_8h
ENSG00000271367	Down_0.25_8h
ENSG00000175514	Down_0.25_8h
ENSG00000227857	Down_0.25_8h
ENSG00000222760	Down_0.25_8h
ENSG00000266957	Down_0.25_8h
ENSG00000223107	Down_0.25_8h
ENSG00000152822	Down_0.25_8h
ENSG00000253372	Down_0.25_8h
ENSG00000170166	Down_0.25_8h
ENSG00000198573	Down_0.25_8h
ENSG00000175202	Down_0.25_8h
ENSG00000243978	Down_0.25_8h
ENSG00000152784	Down_0.25_8h
ENSG00000253430	Down_0.25_8h
ENSG00000248712	Down_0.25_8h
ENSG00000223751	Down_0.25_8h
ENSG00000167311	Down_0.25_8h
ENSG00000236140	Down_0.25_8h
ENSG00000163645	Down_0.25_8h
ENSG00000260165	Down_0.25_8h
ENSG00000141750	Down_0.25_8h
ENSG00000236393	Down_0.25_8h
ENSG00000228397	Down_0.25_8h
ENSG00000240774	Down_0.25_8h
ENSG00000277797	Down_0.25_8h
ENSG00000273819	Down_0.25_8h
ENSG00000273540	Down_0.25_8h
ENSG00000179165	Down_0.25_8h
ENSG00000257879	Down_0.25_8h
ENSG00000248506	Down_0.25_8h
ENSG00000256596	Down_0.25_8h
ENSG00000256443	Down_0.25_8h
ENSG00000235033	Down_0.25_8h
ENSG00000199426	Down_0.25_8h
ENSG00000215878	Down_0.25_8h
ENSG00000112333	Down_0.25_8h
ENSG00000248174	Down_0.25_8h
ENSG00000120907	Down_0.25_8h
ENSG00000198077	Down_0.25_8h
ENSG00000227467	Down_0.25_8h
ENSG00000118473	Down_0.25_8h
ENSG00000250732	Down_0.25_8h
ENSG00000248516	Down_0.25_8h
ENSG00000176253	Down_0.25_8h
ENSG00000261122	Down_0.25_8h
ENSG00000101850	Down_0.25_8h
ENSG00000254226	Down_0.25_8h
ENSG00000018625	Down_0.25_8h
ENSG00000234805	Down_0.25_8h
ENSG00000261754	Down_0.25_8h
ENSG00000273249	Down_0.25_8h
ENSG00000280423	Down_0.25_8h
ENSG00000170748	Down_0.25_8h
ENSG00000249307	Down_0.25_8h
ENSG00000206852	Down_0.25_8h
ENSG00000222438	Down_0.25_8h
ENSG00000259441	Down_0.25_8h
ENSG00000133124	Down_0.25_8h
ENSG00000223807	Down_0.25_8h
ENSG00000259663	Down_0.25_8h
ENSG00000221878	Down_0.25_8h
ENSG00000266958	Down_0.25_8h
ENSG00000242111	Down_0.25_8h
ENSG00000246627	Down_0.25_8h
ENSG00000204704	Down_0.25_8h
ENSG00000267429	Down_0.25_8h
ENSG00000182111	Down_0.25_8h
ENSG00000212257	Down_0.25_8h
ENSG00000257612	Down_0.25_8h
ENSG00000207404	Down_0.25_8h
ENSG00000202275	Down_0.25_8h
ENSG00000212559	Down_0.25_8h
ENSG00000224547	Down_0.25_8h
ENSG00000225147	Down_0.25_8h
ENSG00000227661	Down_0.25_8h
ENSG00000258546	Down_0.25_8h
ENSG00000258081	Down_0.25_8h
ENSG00000270639	Down_0.25_8h
ENSG00000232601	Down_0.25_8h
ENSG00000279617	Down_0.25_8h
ENSG00000273963	Down_0.25_8h
ENSG00000182083	Down_0.25_8h
ENSG00000172772	Down_0.25_8h
ENSG00000234415	Down_0.25_8h
ENSG00000130035	Down_0.25_8h
ENSG00000168828	Down_0.25_8h
ENSG00000264613	Down_0.25_8h
ENSG00000161905	Down_0.25_8h
ENSG00000249944	Down_0.25_8h
ENSG00000261222	Down_0.25_8h
ENSG00000119913	Down_0.25_8h
ENSG00000278058	Down_0.25_8h
ENSG00000138039	Down_0.25_8h
ENSG00000251408	Down_0.25_8h
ENSG00000222182	Down_0.25_8h
ENSG00000256612	Down_0.25_8h
ENSG00000260471	Down_0.25_8h
ENSG00000226665	Down_0.25_8h
ENSG00000252863	Down_0.25_8h
ENSG00000262888	Down_0.25_8h
ENSG00000199832	Down_0.25_8h
ENSG00000226814	Down_0.25_8h
ENSG00000240280	Down_0.25_8h
ENSG00000186081	Down_0.25_8h
ENSG00000251907	Down_0.25_8h
ENSG00000212146	Down_0.25_8h
ENSG00000283787	Down_0.25_8h
ENSG00000117069	Down_0.25_8h
ENSG00000270689	Down_0.25_8h
ENSG00000234270	Down_0.25_8h
ENSG00000211582	Down_0.25_8h
ENSG00000226582	Down_0.25_8h
ENSG00000235282	Down_0.25_8h
ENSG00000229064	Down_0.25_8h
ENSG00000201023	Down_0.25_8h
ENSG00000242512	Down_0.25_8h
ENSG00000260451	Down_0.25_8h
ENSG00000206741	Down_0.25_8h
ENSG00000240487	Down_0.25_8h
ENSG00000236930	Down_0.25_8h
ENSG00000202309	Down_0.25_8h
ENSG00000266431	Down_0.25_8h
ENSG00000226835	Down_0.25_8h
ENSG00000217377	Down_0.25_8h
ENSG00000213210	Down_0.25_8h
ENSG00000204702	Down_0.25_8h
ENSG00000199360	Down_0.25_8h
ENSG00000276542	Down_0.25_8h
ENSG00000280360	Down_0.25_8h
ENSG00000222626	Down_0.25_8h
ENSG00000278569	Down_0.25_8h
ENSG00000280131	Down_0.25_8h
ENSG00000207784	Down_0.25_8h
ENSG00000222308	Down_0.25_8h
ENSG00000234352	Down_0.25_8h
ENSG00000223395	Down_0.25_8h
ENSG00000261646	Down_0.25_8h
ENSG00000139572	Down_0.25_8h
ENSG00000283096	Down_0.25_8h
ENSG00000267781	Down_0.25_8h
ENSG00000255186	Down_0.25_8h
ENSG00000267421	Down_0.25_8h
ENSG00000179420	Down_0.25_8h
ENSG00000272502	Down_0.25_8h
ENSG00000231491	Down_0.25_8h
ENSG00000239958	Down_0.25_8h
ENSG00000207518	Down_0.25_8h
ENSG00000238399	Down_0.25_8h
ENSG00000273321	Down_0.25_8h
ENSG00000267868	Down_0.25_8h
ENSG00000130287	Down_0.25_8h
ENSG00000274848	Down_0.25_8h
ENSG00000258542	Down_0.25_8h
ENSG00000279770	Down_0.25_8h
ENSG00000282834	Down_0.25_8h
ENSG00000237642	Down_0.25_8h
ENSG00000231108	Down_0.25_8h
ENSG00000207804	Down_0.25_8h
ENSG00000205867	Down_0.25_8h
ENSG00000253198	Down_0.25_8h
ENSG00000259831	Down_0.25_8h
ENSG00000273492	Down_0.25_8h
ENSG00000273102	Down_0.25_8h
ENSG00000259392	Down_0.25_8h
ENSG00000232774	Down_0.25_8h
ENSG00000276362	Down_0.25_8h
ENSG00000198812	Down_0.25_8h
ENSG00000238934	Down_0.25_8h
ENSG00000226036	Down_0.25_8h
ENSG00000274515	Down_0.25_8h
ENSG00000205274	Down_0.25_8h
ENSG00000171051	Down_0.25_8h
ENSG00000250219	Down_0.25_8h
ENSG00000251296	Down_0.25_8h
ENSG00000011201	Down_0.25_8h
ENSG00000236980	Down_0.25_8h
ENSG00000205611	Down_0.25_8h
ENSG00000163827	Down_0.25_8h
ENSG00000168621	Down_0.25_8h
ENSG00000223652	Down_0.25_8h
ENSG00000260078	Down_0.25_8h
ENSG00000249610	Down_0.25_8h
ENSG00000251779	Down_0.25_8h
ENSG00000267105	Down_0.25_8h
ENSG00000229485	Down_0.25_8h
ENSG00000188511	Down_0.25_8h
ENSG00000259834	Down_0.25_8h
ENSG00000201048	Down_0.25_8h
ENSG00000258039	Down_0.25_8h
ENSG00000105143	Down_0.25_8h
ENSG00000260674	Down_0.25_8h
ENSG00000226024	Down_0.25_8h
ENSG00000184408	Down_0.25_8h
ENSG00000207058	Down_0.25_8h
ENSG00000175520	Down_0.25_8h
ENSG00000230393	Down_0.25_8h
ENSG00000228098	Down_0.25_8h
ENSG00000176566	Down_0.25_8h
ENSG00000172938	Down_0.25_8h
ENSG00000265008	Down_0.25_8h
ENSG00000196098	Down_0.25_8h
ENSG00000234048	Down_0.25_8h
ENSG00000267767	Down_0.25_8h
ENSG00000228336	Down_0.25_8h
ENSG00000189139	Down_0.25_8h
ENSG00000242836	Down_0.25_8h
ENSG00000222028	Down_0.25_8h
ENSG00000275875	Down_0.25_8h
ENSG00000202050	Down_0.25_8h
ENSG00000239265	Down_0.25_8h
ENSG00000166342	Down_0.25_8h
ENSG00000269986	Down_0.25_8h
ENSG00000212289	Down_0.25_8h
ENSG00000200887	Down_0.25_8h
ENSG00000270989	Down_0.25_8h
ENSG00000260795	Down_0.25_8h
ENSG00000201987	Down_0.25_8h
ENSG00000214374	Down_0.25_8h
ENSG00000147262	Down_0.25_8h
ENSG00000198414	Down_0.25_8h
ENSG00000280154	Down_0.25_8h
ENSG00000230384	Down_0.25_8h
ENSG00000184388	Down_0.25_8h
ENSG00000227582	Down_0.25_8h
ENSG00000271931	Down_0.25_8h
ENSG00000284717	Down_0.25_8h
ENSG00000257443	Down_0.25_8h
ENSG00000270168	Down_0.25_8h
ENSG00000256646	Down_0.25_8h
ENSG00000279474	Down_0.25_8h
ENSG00000278655	Down_0.25_8h
ENSG00000155886	Down_0.25_8h
ENSG00000178395	Down_0.25_8h
ENSG00000241451	Down_0.25_8h
ENSG00000265073	Down_0.25_8h
ENSG00000204694	Down_0.25_8h
ENSG00000251126	Down_0.25_8h
ENSG00000177201	Down_0.25_8h
ENSG00000283324	Down_0.25_8h
ENSG00000253040	Down_0.25_8h
ENSG00000279036	Down_0.25_8h
ENSG00000265432	Down_0.25_8h
ENSG00000236407	Down_0.25_8h
ENSG00000252027	Down_0.25_8h
ENSG00000207360	Down_0.25_8h
ENSG00000207176	Down_0.25_8h
ENSG00000215367	Down_0.25_8h
ENSG00000185775	Down_0.25_8h
ENSG00000279572	Down_0.25_8h
ENSG00000214457	Down_0.25_8h
ENSG00000207135	Down_0.25_8h
ENSG00000279437	Down_0.25_8h
ENSG00000284130	Down_0.25_8h
ENSG00000255227	Down_0.25_8h
ENSG00000253942	Down_0.25_8h
ENSG00000238153	Down_0.25_8h
ENSG00000188425	Down_0.25_8h
ENSG00000200626	Down_0.25_8h
ENSG00000175773	Down_0.25_8h
ENSG00000253138	Down_0.25_8h
ENSG00000197683	Down_0.25_8h
ENSG00000232874	Down_0.25_8h
ENSG00000250074	Down_0.25_8h
ENSG00000206996	Down_0.25_8h
ENSG00000251193	Down_0.25_8h
ENSG00000267271	Down_0.25_8h
ENSG00000267275	Down_0.25_8h
ENSG00000226229	Down_0.25_8h
ENSG00000138813	Down_0.25_8h
ENSG00000233297	Down_0.25_8h
ENSG00000175809	Down_0.25_8h
ENSG00000267554	Down_0.25_8h
ENSG00000262890	Down_0.25_8h
ENSG00000251276	Down_0.25_8h
ENSG00000250573	Down_0.25_8h
ENSG00000217044	Down_0.25_8h
ENSG00000226254	Down_0.25_8h
ENSG00000266290	Down_0.25_8h
ENSG00000201086	Down_0.25_8h
ENSG00000135447	Down_0.25_8h
ENSG00000214581	Down_0.25_8h
ENSG00000238283	Down_0.25_8h
ENSG00000196634	Down_0.25_8h
ENSG00000224595	Down_0.25_8h
ENSG00000273370	Down_0.25_8h
ENSG00000262980	Down_0.25_8h
ENSG00000186453	Down_0.25_8h
ENSG00000270713	Down_0.25_8h
ENSG00000263787	Down_0.25_8h
ENSG00000255365	Down_0.25_8h
ENSG00000128250	Down_0.25_8h
ENSG00000248605	Down_0.25_8h
ENSG00000135355	Down_0.25_8h
ENSG00000223777	Down_0.25_8h
ENSG00000249074	Down_0.25_8h
ENSG00000259791	Down_0.25_8h
ENSG00000241912	Down_0.25_8h
ENSG00000238224	Down_0.25_8h
ENSG00000260564	Down_0.25_8h
ENSG00000249627	Down_0.25_8h
ENSG00000238243	Down_0.25_8h
ENSG00000244062	Down_0.25_8h
ENSG00000204183	Down_0.25_8h
ENSG00000127533	Down_0.25_8h
ENSG00000249851	Down_0.25_8h
ENSG00000204952	Down_0.25_8h
ENSG00000172900	Down_0.25_8h
ENSG00000250268	Down_0.25_8h
ENSG00000185198	Down_0.25_8h
ENSG00000249429	Down_0.25_8h
ENSG00000258877	Down_0.25_8h
ENSG00000255172	Down_0.25_8h
ENSG00000225644	Down_0.25_8h
ENSG00000236153	Down_0.25_8h
ENSG00000220125	Down_0.25_8h
ENSG00000279701	Down_0.25_8h
ENSG00000283155	Down_0.25_8h
ENSG00000232360	Down_0.25_8h
ENSG00000199217	Down_0.25_8h
ENSG00000270209	Down_0.25_8h
ENSG00000270576	Down_0.25_8h
ENSG00000206120	Down_0.25_8h
ENSG00000271249	Down_0.25_8h
ENSG00000200664	Down_0.25_8h
ENSG00000253057	Down_0.25_8h
ENSG00000203907	Down_0.25_8h
ENSG00000225710	Down_0.25_8h
ENSG00000249368	Down_0.25_8h
ENSG00000250049	Down_0.25_8h
ENSG00000204614	Down_0.25_8h
ENSG00000232401	Down_0.25_8h
ENSG00000260761	Down_0.25_8h
ENSG00000233472	Down_0.25_8h
ENSG00000103200	Down_0.25_8h
ENSG00000267054	Down_0.25_8h
ENSG00000253338	Down_0.25_8h
ENSG00000277315	Down_0.25_8h
ENSG00000231984	Down_0.25_8h
ENSG00000237978	Down_0.25_8h
ENSG00000226717	Down_0.25_8h
ENSG00000226155	Down_0.25_8h
ENSG00000165457	Down_0.25_8h
ENSG00000223953	Down_0.25_8h
ENSG00000216475	Down_0.25_8h
ENSG00000237849	Down_0.25_8h
ENSG00000170074	Down_0.25_8h
ENSG00000255919	Down_0.25_8h
ENSG00000279171	Down_0.25_8h
ENSG00000273978	Down_0.25_8h
ENSG00000257517	Down_0.25_8h
ENSG00000071909	Down_0.25_8h
ENSG00000130167	Down_0.25_8h
ENSG00000111432	Down_0.25_8h
ENSG00000279642	Down_0.25_8h
ENSG00000278934	Down_0.25_8h
ENSG00000241829	Down_0.25_8h
ENSG00000249706	Down_0.25_8h
ENSG00000235099	Down_0.25_8h
ENSG00000261340	Down_0.25_8h
ENSG00000240198	Down_0.25_8h
ENSG00000213177	Down_0.25_8h
ENSG00000253258	Down_0.25_8h
ENSG00000260798	Down_0.25_8h
ENSG00000256071	Down_0.25_8h
ENSG00000183019	Down_0.25_8h
ENSG00000255534	Down_0.25_8h
ENSG00000227301	Down_0.25_8h
ENSG00000275852	Down_0.25_8h
ENSG00000200008	Down_0.25_8h
ENSG00000184221	Down_0.25_8h
ENSG00000275665	Down_0.25_8h
ENSG00000227465	Down_0.25_8h
ENSG00000125999	Down_0.25_8h
ENSG00000272281	Down_0.25_8h
ENSG00000249153	Down_0.25_8h
ENSG00000220730	Down_0.25_8h
ENSG00000262381	Down_0.25_8h
ENSG00000258551	Down_0.25_8h
ENSG00000279655	Down_0.25_8h
ENSG00000232091	Down_0.25_8h
ENSG00000214200	Down_0.25_8h
ENSG00000253379	Down_0.25_8h
ENSG00000155011	Down_0.25_8h
ENSG00000228595	Down_0.25_8h
ENSG00000201412	Down_0.25_8h
ENSG00000258894	Down_0.25_8h
ENSG00000189090	Down_0.25_8h
ENSG00000124491	Down_0.25_8h
ENSG00000202044	Down_0.25_8h
ENSG00000230292	Down_0.25_8h
ENSG00000226854	Down_0.25_8h
ENSG00000225801	Down_0.25_8h
ENSG00000250392	Down_0.25_8h
ENSG00000212358	Down_0.25_8h
ENSG00000220349	Down_0.25_8h
ENSG00000223373	Down_0.25_8h
ENSG00000100433	Down_0.25_8h
ENSG00000243321	Down_0.25_8h
ENSG00000152213	Down_0.25_8h
ENSG00000266515	Down_0.25_8h
ENSG00000256650	Down_0.25_8h
ENSG00000267679	Down_0.25_8h
ENSG00000232311	Down_0.25_8h
ENSG00000244083	Down_0.25_8h
ENSG00000283159	Down_0.25_8h
ENSG00000174059	Down_0.25_8h
ENSG00000240934	Down_0.25_8h
ENSG00000267389	Down_0.25_8h
ENSG00000138823	Down_0.25_8h
ENSG00000234350	Down_0.25_8h
ENSG00000272832	Down_0.25_8h
ENSG00000255266	Down_0.25_8h
ENSG00000123594	Down_0.25_8h
ENSG00000154258	Down_0.25_8h
ENSG00000272970	Down_0.25_8h
ENSG00000225003	Down_0.25_8h
ENSG00000237926	Down_0.25_8h
ENSG00000231166	Down_0.25_8h
ENSG00000234895	Down_0.25_8h
ENSG00000254736	Down_0.25_8h
ENSG00000171551	Down_0.25_8h
ENSG00000255511	Down_0.25_8h
ENSG00000255916	Down_0.25_8h
ENSG00000271681	Down_0.25_8h
ENSG00000273006	Down_0.25_8h
ENSG00000260678	Down_0.25_8h
ENSG00000222107	Down_0.25_8h
ENSG00000226888	Down_0.25_8h
ENSG00000249894	Down_0.25_8h
ENSG00000252812	Down_0.25_8h
ENSG00000238211	Down_0.25_8h
ENSG00000279440	Down_0.25_8h
ENSG00000227350	Down_0.25_8h
ENSG00000207989	Down_0.25_8h
ENSG00000267287	Down_0.25_8h
ENSG00000229753	Down_0.25_8h
ENSG00000270659	Down_0.25_8h
ENSG00000221331	Down_0.25_8h
ENSG00000218754	Down_0.25_8h
ENSG00000270538	Down_0.25_8h
ENSG00000231725	Down_0.25_8h
ENSG00000263241	Down_0.25_8h
ENSG00000121634	Down_0.25_8h
ENSG00000275476	Down_0.25_8h
ENSG00000279149	Down_0.25_8h
ENSG00000171124	Down_0.25_8h
ENSG00000186973	Down_0.25_8h
ENSG00000213916	Down_0.25_8h
ENSG00000230180	Down_0.25_8h
ENSG00000252615	Down_0.25_8h
ENSG00000248802	Down_0.25_8h
ENSG00000215952	Down_0.25_8h
ENSG00000079215	Down_0.25_8h
ENSG00000269891	Down_0.25_8h
ENSG00000219700	Down_0.25_8h
ENSG00000254129	Down_0.25_8h
ENSG00000200893	Down_0.25_8h
ENSG00000158553	Down_0.25_8h
ENSG00000272746	Down_0.25_8h
ENSG00000175518	Down_0.25_8h
ENSG00000145244	Down_0.25_8h
ENSG00000237940	Down_0.25_8h
ENSG00000188089	Down_0.25_8h
ENSG00000198277	Down_0.25_8h
ENSG00000166317	Down_0.25_8h
ENSG00000114547	Down_0.25_8h
ENSG00000183206	Down_0.25_8h
ENSG00000225840	Down_0.25_8h
ENSG00000233688	Down_0.25_8h
ENSG00000163581	Down_0.25_8h
ENSG00000278865	Down_0.25_8h
ENSG00000235055	Down_0.25_8h
ENSG00000157703	Down_0.25_8h
ENSG00000197171	Down_0.25_8h
ENSG00000279881	Down_0.25_8h
ENSG00000248850	Down_0.25_8h
ENSG00000260112	Down_0.25_8h
ENSG00000224761	Down_0.25_8h
ENSG00000239263	Down_0.25_8h
ENSG00000212521	Down_0.25_8h
ENSG00000252461	Down_0.25_8h
ENSG00000233713	Down_0.25_8h
ENSG00000278737	Down_0.25_8h
ENSG00000235931	Down_0.25_8h
ENSG00000234902	Down_0.25_8h
ENSG00000201469	Down_0.25_8h
ENSG00000237099	Down_0.25_8h
ENSG00000258480	Down_0.25_8h
ENSG00000248851	Down_0.25_8h
ENSG00000272566	Down_0.25_8h
ENSG00000235929	Down_0.25_8h
ENSG00000264737	Down_0.25_8h
ENSG00000249681	Down_0.25_8h
ENSG00000196472	Down_0.25_8h
ENSG00000283098	Down_0.25_8h
ENSG00000252322	Down_0.25_8h
ENSG00000273971	Down_0.25_8h
ENSG00000243346	Down_0.25_8h
ENSG00000251165	Down_0.25_8h
ENSG00000255652	Down_0.25_8h
ENSG00000235544	Down_0.25_8h
ENSG00000184672	Down_0.25_8h
ENSG00000216324	Down_0.25_8h
ENSG00000233121	Down_0.25_8h
ENSG00000261030	Down_0.25_8h
ENSG00000223538	Down_0.25_8h
ENSG00000233309	Down_0.25_8h
ENSG00000270627	Down_0.25_8h
ENSG00000215023	Down_0.25_8h
ENSG00000240498	Down_0.25_8h
ENSG00000227177	Down_0.25_8h
ENSG00000066056	Down_0.25_8h
ENSG00000196482	Down_0.25_8h
ENSG00000213045	Down_0.25_8h
ENSG00000252485	Down_0.25_8h
ENSG00000228489	Down_0.25_8h
ENSG00000204816	Down_0.25_8h
ENSG00000268119	Down_0.25_8h
ENSG00000273272	Down_0.25_8h
ENSG00000162949	Down_0.25_8h
ENSG00000233562	Down_0.25_8h
ENSG00000131482	Down_0.25_8h
ENSG00000021461	Down_0.25_8h
ENSG00000255382	Down_0.25_8h
ENSG00000270178	Down_0.25_8h
ENSG00000256146	Down_0.25_8h
ENSG00000197013	Down_0.25_8h
ENSG00000212558	Down_0.25_8h
ENSG00000258552	Down_0.25_8h
ENSG00000242296	Down_0.25_8h
ENSG00000203593	Down_0.25_8h
ENSG00000144648	Down_0.25_8h
ENSG00000222472	Down_0.25_8h
ENSG00000214064	Down_0.25_8h
ENSG00000279011	Down_0.25_8h
ENSG00000277020	Down_0.25_8h
ENSG00000251123	Down_0.25_8h
ENSG00000280336	Down_0.25_8h
ENSG00000239365	Down_0.25_8h
ENSG00000234721	Down_0.25_8h
ENSG00000262259	Down_0.25_8h
ENSG00000181908	Down_0.25_8h
ENSG00000201464	Down_0.25_8h
ENSG00000280155	Down_0.25_8h
ENSG00000261044	Down_0.25_8h
ENSG00000183251	Down_0.25_8h
ENSG00000227557	Down_0.25_8h
ENSG00000207056	Down_0.25_8h
ENSG00000240990	Down_0.25_8h
ENSG00000203581	Down_0.25_8h
ENSG00000216829	Down_0.25_8h
ENSG00000204740	Down_0.25_8h
ENSG00000162882	Down_0.25_8h
ENSG00000253986	Down_0.25_8h
ENSG00000231980	Down_0.25_8h
ENSG00000282317	Down_0.25_8h
ENSG00000129910	Down_0.25_8h
ENSG00000248931	Down_0.25_8h
ENSG00000228277	Down_0.25_8h
ENSG00000112303	Down_0.25_8h
ENSG00000283627	Down_0.25_8h
ENSG00000144820	Down_0.25_8h
ENSG00000260151	Down_0.25_8h
ENSG00000231866	Down_0.25_8h
ENSG00000279775	Down_0.25_8h
ENSG00000259569	Down_0.25_8h
ENSG00000269916	Down_0.25_8h
ENSG00000279908	Down_0.25_8h
ENSG00000222800	Down_0.25_8h
ENSG00000249825	Down_0.25_8h
ENSG00000258451	Down_0.25_8h
ENSG00000124875	Down_0.25_8h
ENSG00000176533	Down_0.25_8h
ENSG00000110934	Down_0.25_8h
ENSG00000225465	Down_0.25_8h
ENSG00000106723	Down_0.25_8h
ENSG00000260259	Down_0.25_8h
ENSG00000228314	Down_0.25_8h
ENSG00000251349	Down_0.25_8h
ENSG00000182652	Down_0.25_8h
ENSG00000185149	Down_0.25_8h
ENSG00000236137	Down_0.25_8h
ENSG00000214198	Down_0.25_8h
ENSG00000185467	Down_0.25_8h
ENSG00000163121	Down_0.25_8h
ENSG00000147571	Down_0.25_8h
ENSG00000272247	Down_0.25_8h
ENSG00000258957	Down_0.25_8h
ENSG00000259970	Down_0.25_8h
ENSG00000161328	Down_0.25_8h
ENSG00000231297	Down_0.25_8h
ENSG00000230148	Down_0.25_8h
ENSG00000130517	Down_0.25_8h
ENSG00000200708	Down_0.25_8h
ENSG00000230325	Down_0.25_8h
ENSG00000237409	Down_0.25_8h
ENSG00000242779	Down_0.25_8h
ENSG00000271207	Down_0.25_8h
ENSG00000226288	Down_0.25_8h
ENSG00000277446	Down_0.25_8h
ENSG00000254512	Down_0.25_8h
ENSG00000231574	Down_0.25_8h
ENSG00000271081	Down_0.25_8h
ENSG00000273181	Down_0.25_8h
ENSG00000213265	Down_0.25_8h
ENSG00000152578	Down_0.25_8h
ENSG00000229463	Down_0.25_8h
ENSG00000224019	Down_0.25_8h
ENSG00000252129	Down_0.25_8h
ENSG00000272186	Down_0.25_8h
ENSG00000125850	Down_0.25_8h
ENSG00000203697	Down_0.25_8h
ENSG00000273980	Down_0.25_8h
ENSG00000143127	Down_0.25_8h
ENSG00000253227	Down_0.25_8h
ENSG00000181449	Down_0.25_8h
ENSG00000172795	Down_0.25_8h
ENSG00000230758	Down_0.25_8h
ENSG00000253522	Down_0.25_8h
ENSG00000115590	Down_0.25_8h
ENSG00000151303	Down_0.25_8h
ENSG00000142552	Down_0.25_8h
ENSG00000259211	Down_0.25_8h
ENSG00000265257	Down_0.25_8h
ENSG00000200183	Down_0.25_8h
ENSG00000274269	Down_0.25_8h
ENSG00000259665	Down_0.25_8h
ENSG00000280167	Down_0.25_8h
ENSG00000274170	Down_0.25_8h
ENSG00000235102	Down_0.25_8h
ENSG00000277324	Down_0.25_8h
ENSG00000214976	Down_0.25_8h
ENSG00000223733	Down_0.25_8h
ENSG00000266745	Down_0.25_8h
ENSG00000171502	Down_0.25_8h
ENSG00000241721	Down_0.25_8h
ENSG00000261489	Down_0.25_8h
ENSG00000226792	Down_0.25_8h
ENSG00000259019	Down_0.25_8h
ENSG00000276202	Down_0.25_8h
ENSG00000221036	Down_0.25_8h
ENSG00000225638	Down_0.25_8h
ENSG00000264373	Down_0.25_8h
ENSG00000220326	Down_0.25_8h
ENSG00000283888	Down_0.25_8h
ENSG00000202279	Down_0.25_8h
ENSG00000222658	Down_0.25_8h
ENSG00000278492	Down_0.25_8h
ENSG00000252230	Down_0.25_8h
ENSG00000212182	Down_0.25_8h
ENSG00000207773	Down_0.25_8h
ENSG00000184486	Down_0.25_8h
ENSG00000250041	Down_0.25_8h
ENSG00000207994	Down_0.25_8h
ENSG00000283464	Down_0.25_8h
ENSG00000244753	Down_0.25_8h
ENSG00000157060	Down_0.25_8h
ENSG00000280396	Down_0.25_8h
ENSG00000282865	Down_0.25_8h
ENSG00000273372	Down_0.25_8h
ENSG00000271814	Down_0.25_8h
ENSG00000261404	Down_0.25_8h
ENSG00000272081	Down_0.25_8h
ENSG00000261288	Down_0.25_8h
ENSG00000233318	Down_0.25_8h
ENSG00000264268	Down_0.25_8h
ENSG00000207069	Down_0.25_8h
ENSG00000207104	Down_0.25_8h
ENSG00000231660	Down_0.25_8h
ENSG00000216902	Down_0.25_8h
ENSG00000283829	Down_0.25_8h
ENSG00000230169	Down_0.25_8h
ENSG00000278549	Down_0.25_8h
ENSG00000284038	Down_0.25_8h
ENSG00000254737	Down_0.25_8h
ENSG00000207922	Down_0.25_8h
ENSG00000199047	Down_0.25_8h
ENSG00000212335	Down_0.25_8h
ENSG00000268580	Down_0.25_8h
ENSG00000222880	Down_0.25_8h
ENSG00000240027	Down_0.25_8h
ENSG00000235868	Down_0.25_8h
ENSG00000199223	Down_0.25_8h
ENSG00000270384	Down_0.25_8h
ENSG00000234192	Down_0.25_8h
ENSG00000265390	Down_0.25_8h
ENSG00000222067	Down_0.25_8h
ENSG00000199740	Down_0.25_8h
ENSG00000243058	Down_0.25_8h
ENSG00000275808	Down_0.25_8h
ENSG00000280075	Down_0.25_8h
ENSG00000281696	Down_0.25_8h
ENSG00000232730	Down_0.25_8h
ENSG00000184774	Down_0.25_8h
ENSG00000241045	Down_0.25_8h
ENSG00000283755	Down_0.25_8h
ENSG00000236592	Down_0.25_8h
ENSG00000243761	Down_0.25_8h
ENSG00000265626	Down_0.25_8h
ENSG00000283371	Down_0.25_8h
ENSG00000264676	Down_0.25_8h
ENSG00000277762	Down_0.25_8h
ENSG00000267694	Down_0.25_8h
ENSG00000202125	Down_0.25_8h
ENSG00000271010	Down_0.25_8h
ENSG00000265521	Down_0.25_8h
ENSG00000278465	Down_0.25_8h
ENSG00000275585	Down_0.25_8h
ENSG00000279882	Down_0.25_8h
ENSG00000235101	Down_0.25_8h
ENSG00000203531	Down_0.25_8h
ENSG00000257332	Down_0.25_8h
ENSG00000228611	Down_0.25_8h
ENSG00000265319	Down_0.25_8h
ENSG00000264727	Down_0.25_8h
ENSG00000277941	Down_0.25_8h
ENSG00000258491	Down_0.25_8h
ENSG00000283853	Down_0.25_8h
ENSG00000263628	Down_0.25_8h
ENSG00000259873	Down_0.25_8h
ENSG00000270962	Down_0.25_8h
ENSG00000270610	Down_0.25_8h
ENSG00000250844	Down_0.25_8h
ENSG00000233136	Down_0.25_8h
ENSG00000223569	Down_0.25_8h
ENSG00000229786	Down_0.25_8h
ENSG00000206703	Down_0.25_8h
ENSG00000283871	Down_0.25_8h
ENSG00000182968	Down_0.25_8h
ENSG00000250231	Down_0.25_8h
ENSG00000264210	Down_0.25_8h
ENSG00000212293	Down_0.25_8h
ENSG00000228872	Down_0.25_8h
ENSG00000109181	Down_0.25_8h
ENSG00000147437	Down_0.25_8h
ENSG00000230583	Down_0.25_8h
ENSG00000105559	Down_0.25_8h
ENSG00000262678	Down_0.25_8h
ENSG00000263838	Down_0.25_8h
ENSG00000261265	Down_0.25_8h
ENSG00000227115	Down_0.25_8h
ENSG00000125965	Down_0.25_8h
ENSG00000252236	Down_0.25_8h
ENSG00000254349	Down_0.25_8h
ENSG00000264171	Down_0.25_8h
ENSG00000271382	Down_0.25_8h
ENSG00000147606	Down_0.25_8h
ENSG00000278822	Down_0.25_8h
ENSG00000187758	Down_0.25_8h
ENSG00000213999	Down_0.25_8h
ENSG00000256045	Down_0.25_8h
ENSG00000271853	Down_0.25_8h
ENSG00000268434	Down_0.25_8h
ENSG00000237663	Down_0.25_8h
ENSG00000230724	Down_0.25_8h
ENSG00000272137	Down_0.25_8h
ENSG00000229089	Down_0.25_8h
ENSG00000244033	Down_0.25_8h
ENSG00000182836	Down_0.25_8h
ENSG00000078900	Down_0.25_8h
ENSG00000279954	Down_0.25_8h
ENSG00000182585	Down_0.25_8h
ENSG00000254205	Down_0.25_8h
ENSG00000272354	Down_0.25_8h
ENSG00000224231	Down_0.25_8h
ENSG00000159871	Down_0.25_8h
ENSG00000227290	Down_0.25_8h
ENSG00000178722	Down_0.25_8h
ENSG00000275454	Down_0.25_8h
ENSG00000250644	Down_0.25_8h
ENSG00000100156	Down_0.25_8h
ENSG00000265369	Down_0.25_8h
ENSG00000212280	Down_0.25_8h
ENSG00000261240	Down_0.25_8h
ENSG00000235078	Down_0.25_8h
ENSG00000212378	Down_0.25_8h
ENSG00000176230	Down_0.25_8h
ENSG00000263405	Down_0.25_8h
ENSG00000231810	Down_0.25_8h
ENSG00000220540	Down_0.25_8h
ENSG00000221662	Down_0.25_8h
ENSG00000254415	Down_0.25_8h
ENSG00000232101	Down_0.25_8h
ENSG00000238180	Down_0.25_8h
ENSG00000213179	Down_0.25_8h
ENSG00000231471	Down_0.25_8h
ENSG00000256234	Down_0.25_8h
ENSG00000207162	Down_0.25_8h
ENSG00000232361	Down_0.25_8h
ENSG00000212939	Down_0.25_8h
ENSG00000268154	Down_0.25_8h
ENSG00000233916	Down_0.25_8h
ENSG00000224295	Down_0.25_8h
ENSG00000279584	Down_0.25_8h
ENSG00000206589	Down_0.25_8h
ENSG00000223202	Down_0.25_8h
ENSG00000212102	Down_0.25_8h
ENSG00000207948	Down_0.25_8h
ENSG00000229985	Down_0.25_8h
ENSG00000207561	Down_0.25_8h
ENSG00000207815	Down_0.25_8h
ENSG00000233292	Down_0.25_8h
ENSG00000239035	Down_0.25_8h
ENSG00000266299	Down_0.25_8h
ENSG00000267703	Down_0.25_8h
ENSG00000253674	Down_0.25_8h
ENSG00000007216	Down_0.25_8h
ENSG00000222858	Down_0.25_8h
ENSG00000234112	Down_0.25_8h
ENSG00000212186	Down_0.25_8h
ENSG00000275107	Down_0.25_8h
ENSG00000284258	Down_0.25_8h
ENSG00000213081	Down_0.25_8h
ENSG00000258595	Down_0.25_8h
ENSG00000280305	Down_0.25_8h
ENSG00000202522	Down_0.25_8h
ENSG00000274759	Down_0.25_8h
ENSG00000180150	Down_0.25_8h
ENSG00000254423	Down_0.25_8h
ENSG00000226413	Down_0.25_8h
ENSG00000202399	Down_0.25_8h
ENSG00000222691	Down_0.25_8h
ENSG00000232350	Down_0.25_8h
ENSG00000227597	Down_0.25_8h
ENSG00000252443	Down_0.25_8h
ENSG00000230470	Down_0.25_8h
ENSG00000259450	Down_0.25_8h
ENSG00000228775	Down_0.25_8h
ENSG00000276261	Down_0.25_8h
ENSG00000229044	Down_0.25_8h
ENSG00000252148	Down_0.25_8h
ENSG00000232081	Down_0.25_8h
ENSG00000229921	Down_0.25_8h
ENSG00000228013	Down_0.25_8h
ENSG00000267520	Down_0.25_8h
ENSG00000265128	Down_0.25_8h
ENSG00000235070	Down_0.25_8h
ENSG00000249540	Down_0.25_8h
ENSG00000185101	Down_0.25_8h
ENSG00000267501	Down_0.25_8h
ENSG00000272692	Down_0.25_8h
ENSG00000225169	Down_0.25_8h
ENSG00000131183	Down_0.25_8h
ENSG00000241155	Down_0.25_8h
ENSG00000242595	Down_0.25_8h
ENSG00000271776	Down_0.25_8h
ENSG00000183775	Down_0.25_8h
ENSG00000207606	Down_0.25_8h
ENSG00000255421	Down_0.25_8h
ENSG00000271730	Down_0.25_8h
ENSG00000282413	Down_0.25_8h
ENSG00000261068	Down_0.25_8h
ENSG00000243568	Down_0.25_8h
ENSG00000248616	Down_0.25_8h
ENSG00000274603	Down_0.25_8h
ENSG00000279486	Down_0.25_8h
ENSG00000180770	Down_0.25_8h
ENSG00000251739	Down_0.25_8h
ENSG00000259691	Down_0.25_8h
ENSG00000162645	Down_0.25_8h
ENSG00000103723	Down_0.25_8h
ENSG00000227205	Down_0.25_8h
ENSG00000275127	Down_0.25_8h
ENSG00000207297	Down_0.25_8h
ENSG00000188761	Down_0.25_8h
ENSG00000226752	Down_0.25_8h
ENSG00000238199	Down_0.25_8h
ENSG00000257042	Down_0.25_8h
ENSG00000156711	Down_0.25_8h
ENSG00000168852	Down_0.25_8h
ENSG00000111452	Down_0.25_8h
ENSG00000162643	Down_0.25_8h
ENSG00000066230	Down_0.25_8h
ENSG00000172748	Down_0.25_8h
ENSG00000255730	Down_0.25_8h
ENSG00000231241	Down_0.25_8h
ENSG00000259345	Down_0.25_8h
ENSG00000114541	Down_0.25_8h
ENSG00000252860	Down_0.25_8h
ENSG00000196967	Down_0.25_8h
ENSG00000272070	Down_0.25_8h
ENSG00000252412	Down_0.25_8h
ENSG00000007306	Down_0.25_8h
ENSG00000280502	Down_0.25_8h
ENSG00000260836	Down_0.25_8h
ENSG00000122877	Down_0.25_8h
ENSG00000184608	Down_0.25_8h
ENSG00000235162	Down_0.25_8h
ENSG00000235100	Down_0.25_8h
ENSG00000196844	Down_0.25_8h
ENSG00000261633	Down_0.25_8h
ENSG00000221639	Down_0.25_8h
ENSG00000263790	Down_0.25_8h
ENSG00000252569	Down_0.25_8h
ENSG00000265972	Down_0.25_8h
ENSG00000231401	Down_0.25_8h
ENSG00000249092	Down_0.25_8h
ENSG00000249413	Down_0.25_8h
ENSG00000273106	Down_0.25_8h
ENSG00000119401	Down_0.25_8h
ENSG00000225111	Down_0.25_8h
ENSG00000257718	Down_0.25_8h
ENSG00000225611	Down_0.25_8h
ENSG00000135226	Down_0.25_8h
ENSG00000230684	Down_0.25_8h
ENSG00000125492	Down_0.25_8h
ENSG00000248529	Down_0.25_8h
ENSG00000137814	Down_0.25_8h
ENSG00000139797	Down_0.25_8h
ENSG00000214796	Down_0.25_8h
ENSG00000248388	Down_0.25_8h
ENSG00000072657	Down_0.25_8h
ENSG00000272434	Down_0.25_8h
ENSG00000135077	Down_0.25_8h
ENSG00000259946	Down_0.25_8h
ENSG00000232640	Down_0.25_8h
ENSG00000180481	Down_0.25_8h
ENSG00000264985	Down_0.25_8h
ENSG00000255650	Down_0.25_8h
ENSG00000123838	Down_0.25_8h
ENSG00000122592	Down_0.25_8h
ENSG00000273398	Down_0.25_8h
ENSG00000248926	Down_0.25_8h
ENSG00000214855	Down_0.25_8h
ENSG00000236426	Down_0.25_8h
ENSG00000237705	Down_0.25_8h
ENSG00000170647	Down_0.25_8h
ENSG00000252319	Down_0.25_8h
ENSG00000221406	Down_0.25_8h
ENSG00000238181	Down_0.25_8h
ENSG00000264296	Down_0.25_8h
ENSG00000252212	Down_0.25_8h
ENSG00000268992	Down_0.25_8h
ENSG00000222068	Down_0.25_8h
ENSG00000260372	Down_0.25_8h
ENSG00000223730	Down_0.25_8h
ENSG00000221340	Down_0.25_8h
ENSG00000276505	Down_0.25_8h
ENSG00000221038	Down_0.25_8h
ENSG00000275265	Down_0.25_8h
ENSG00000242242	Down_0.25_8h
ENSG00000246211	Down_0.25_8h
ENSG00000182901	Down_0.25_8h
ENSG00000275878	Down_0.25_8h
ENSG00000049249	Down_0.25_8h
ENSG00000167037	Down_0.25_8h
ENSG00000198625	Down_0.25_8h
ENSG00000242791	Down_0.25_8h
ENSG00000252712	Down_0.25_8h
ENSG00000238035	Down_0.25_8h
ENSG00000188959	Down_0.25_8h
ENSG00000256030	Down_0.25_8h
ENSG00000106034	Down_0.25_8h
ENSG00000259925	Down_0.25_8h
ENSG00000252643	Down_0.25_8h
ENSG00000270141	Down_0.25_8h
ENSG00000200318	Down_0.25_8h
ENSG00000199598	Down_0.25_8h
ENSG00000258316	Down_0.25_8h
ENSG00000199459	Down_0.25_8h
ENSG00000241791	Down_0.25_8h
ENSG00000230125	Down_0.25_8h
ENSG00000259899	Down_0.25_8h
ENSG00000005379	Down_0.25_8h
ENSG00000271172	Down_0.25_8h
ENSG00000252800	Down_0.25_8h
ENSG00000215286	Down_0.25_8h
ENSG00000233114	Down_0.25_8h
ENSG00000268836	Down_0.25_8h
ENSG00000259617	Down_0.25_8h
ENSG00000164418	Down_0.25_8h
ENSG00000256035	Down_0.25_8h
ENSG00000273374	Down_0.25_8h
ENSG00000237178	Down_0.25_8h
ENSG00000274397	Down_0.25_8h
ENSG00000042304	Down_0.25_8h
ENSG00000248323	Down_0.25_8h
ENSG00000267387	Down_0.25_8h
ENSG00000232978	Down_0.25_8h
ENSG00000237133	Down_0.25_8h
ENSG00000230337	Down_0.25_8h
ENSG00000207951	Down_0.25_8h
ENSG00000176383	Down_0.25_8h
ENSG00000138650	Down_0.25_8h
ENSG00000137960	Down_0.25_8h
ENSG00000204420	Down_0.25_8h
ENSG00000173557	Down_0.25_8h
ENSG00000111728	Down_0.25_8h
ENSG00000263096	Down_0.25_8h
ENSG00000240875	Down_0.25_8h
ENSG00000244194	Down_0.25_8h
ENSG00000124701	Down_0.25_8h
ENSG00000273045	Down_0.25_8h
ENSG00000257038	Down_0.25_8h
ENSG00000092758	Down_0.25_8h
ENSG00000252568	Down_0.25_8h
ENSG00000238906	Down_0.25_8h
ENSG00000244130	Down_0.25_8h
ENSG00000201557	Down_0.25_8h
ENSG00000227463	Down_0.25_8h
ENSG00000254076	Down_0.25_8h
ENSG00000283692	Down_0.25_8h
ENSG00000269919	Down_0.25_8h
ENSG00000266407	Down_0.25_8h
ENSG00000252206	Down_0.25_8h
ENSG00000070190	Down_0.25_8h
ENSG00000275975	Down_0.25_8h
ENSG00000242983	Down_0.25_8h
ENSG00000277590	Down_0.25_8h
ENSG00000261904	Down_0.25_8h
ENSG00000231123	Down_0.25_8h
ENSG00000199571	Down_0.25_8h
ENSG00000278200	Down_0.25_8h
ENSG00000199161	Down_0.25_8h
ENSG00000135423	Down_0.25_8h
ENSG00000163114	Down_0.25_8h
ENSG00000255808	Down_0.25_8h
ENSG00000267466	Down_0.25_8h
ENSG00000261480	Down_0.25_8h
ENSG00000214274	Down_0.25_8h
ENSG00000226469	Down_0.25_8h
ENSG00000228021	Down_0.25_8h
ENSG00000228727	Down_0.25_8h
ENSG00000254846	Down_0.25_8h
ENSG00000248714	Down_0.25_8h
ENSG00000229893	Down_0.25_8h
[truncated: 13,194 more rows]

## Sheet: C_VennDiagramResults
Names	total	elements
Down 0.25_24h Down 0.25_8h Down 0.5_24h Down 0.5_8h	225	ENSG00000274372
		ENSG00000235293
		ENSG00000259502
		ENSG00000250538
		ENSG00000258867
		ENSG00000183251
		ENSG00000168126
		ENSG00000247199
		ENSG00000259954
		ENSG00000271913
		ENSG00000248702
		ENSG00000248429
		ENSG00000187288
		ENSG00000233136
		ENSG00000230239
		ENSG00000160883
		ENSG00000268836
		ENSG00000225411
		ENSG00000274253
		ENSG00000196482
		ENSG00000128218
		ENSG00000255052
		ENSG00000207056
		ENSG00000164825
		ENSG00000271367
		ENSG00000249413
		ENSG00000100156
		ENSG00000274759
		ENSG00000219150
		ENSG00000278313
		ENSG00000181449
		ENSG00000258292
		ENSG00000182836
		ENSG00000258386
		ENSG00000201464
		ENSG00000232412
		ENSG00000271741
		ENSG00000273516
		ENSG00000124657
		ENSG00000196620
		ENSG00000230274
		ENSG00000274560
		ENSG00000226443
		ENSG00000213512
		ENSG00000253116
		ENSG00000253582
		ENSG00000109667
		ENSG00000213424
		ENSG00000181904
		ENSG00000168131
		ENSG00000232354
		ENSG00000232909
		ENSG00000260515
		ENSG00000197083
		ENSG00000148584
		ENSG00000242595
		ENSG00000229079
		ENSG00000259359
		ENSG00000217159
		ENSG00000224256
		ENSG00000225082
		ENSG00000229842
		ENSG00000266151
		ENSG00000103154
		ENSG00000199497
		ENSG00000253944
		ENSG00000245750
		ENSG00000225376
		ENSG00000149735
		ENSG00000205111
		ENSG00000237226
		ENSG00000144820
		ENSG00000277020
		ENSG00000248079
		ENSG00000226110
		ENSG00000206014
		ENSG00000233217
		ENSG00000232125
		ENSG00000267175
		ENSG00000231574
		ENSG00000249825
		ENSG00000042832
		ENSG00000104415
		ENSG00000280336
		ENSG00000110002
		ENSG00000273885
		ENSG00000259569
		ENSG00000128645
		ENSG00000254888
		ENSG00000165511
		ENSG00000181908
		ENSG00000275636
		ENSG00000267607
		ENSG00000139985
		ENSG00000130643
		ENSG00000248172
		ENSG00000284385
		ENSG00000263970
		ENSG00000124875
		ENSG00000106034
		ENSG00000270610
		ENSG00000252451
		ENSG00000226942
		ENSG00000253500
		ENSG00000185523
		ENSG00000110934
		ENSG00000250021
		ENSG00000264520
		ENSG00000172794
		ENSG00000232350
		ENSG00000223538
		ENSG00000280155
		ENSG00000232706
		ENSG00000267456
		ENSG00000242953
		ENSG00000188959
		ENSG00000272971
		ENSG00000260151
		ENSG00000012504
		ENSG00000208033
		ENSG00000199107
		ENSG00000185149
		ENSG00000261030
		ENSG00000228277
		ENSG00000253522
		ENSG00000262259
		ENSG00000252184
		ENSG00000216324
		ENSG00000242529
		ENSG00000105967
		ENSG00000105289
		ENSG00000127528
		ENSG00000233411
		ENSG00000234721
		ENSG00000253404
		ENSG00000204385
		ENSG00000241825
		ENSG00000284603
		ENSG00000239625
		ENSG00000237927
		ENSG00000212422
		ENSG00000274836
		ENSG00000251544
		ENSG00000007306
		ENSG00000184454
		ENSG00000197769
		ENSG00000248109
		ENSG00000236463
		ENSG00000246982
		ENSG00000262223
		ENSG00000251191
		ENSG00000079101
		ENSG00000255650
		ENSG00000235544
		ENSG00000283813
		ENSG00000267778
		ENSG00000240174
		ENSG00000267482
		ENSG00000112303
		ENSG00000280276
		ENSG00000165695
		ENSG00000231866
		ENSG00000283745
		ENSG00000239365
		ENSG00000232579
		ENSG00000126266
		ENSG00000257231
		ENSG00000250997
		ENSG00000125735
		ENSG00000176533
		ENSG00000214064
		ENSG00000164125
		ENSG00000267521
		ENSG00000279011
		ENSG00000223107
		ENSG00000199015
		ENSG00000283627
		ENSG00000231170
		ENSG00000131910
		ENSG00000019991
		ENSG00000057593
		ENSG00000109181
		ENSG00000204616
		ENSG00000222800
		ENSG00000261044
		ENSG00000227557
		ENSG00000223569
		ENSG00000115361
		ENSG00000229676
		ENSG00000257183
		ENSG00000251123
		ENSG00000132681
		ENSG00000196639
		ENSG00000272922
		ENSG00000258849
		ENSG00000265097
		ENSG00000205890
		ENSG00000233309
		ENSG00000257458
		ENSG00000279908
		ENSG00000250745
		ENSG00000184672
		ENSG00000231063
		ENSG00000226149
		ENSG00000233121
		ENSG00000284128
		ENSG00000229921
		ENSG00000167037
		ENSG00000232306
		ENSG00000124602
		ENSG00000179044
		ENSG00000189409
		ENSG00000230497
		ENSG00000255343
		ENSG00000250844
		ENSG00000223911
		ENSG00000251694
		ENSG00000258793
		ENSG00000271853
		ENSG00000251393
		ENSG00000180481
		ENSG00000259112
		ENSG00000263311
		ENSG00000270394
		ENSG00000175514
Down 0.25_24h Down 0.25_8h Down 0.5_8h	203	ENSG00000240057
		ENSG00000237976
		ENSG00000175518
		ENSG00000139656
		ENSG00000220721
		ENSG00000230321
		ENSG00000179055
		ENSG00000243319
		ENSG00000220008
		ENSG00000256150
		ENSG00000280296
		ENSG00000281348
		ENSG00000253334
		ENSG00000254816
		ENSG00000255910
		ENSG00000203279
		ENSG00000127324
		ENSG00000270538
		ENSG00000281379
		ENSG00000012779
		ENSG00000266313
		ENSG00000235295
		ENSG00000152578
		ENSG00000271142
		ENSG00000274603
		ENSG00000184774
		ENSG00000278735
		ENSG00000145384
		ENSG00000206684
		ENSG00000237548
		ENSG00000232097
		ENSG00000200455
		ENSG00000231123
		ENSG00000178150
		ENSG00000170909
		ENSG00000102104
		ENSG00000178722
		ENSG00000250238
		ENSG00000260643
		ENSG00000236878
		ENSG00000145029
		ENSG00000198277
		ENSG00000186973
		ENSG00000183169
		ENSG00000204136
		ENSG00000184276
		ENSG00000276434
		ENSG00000250858
		ENSG00000214290
		ENSG00000233713
		ENSG00000201395
		ENSG00000265626
		ENSG00000258542
		ENSG00000274751
		ENSG00000253686
		ENSG00000188580
		ENSG00000258461
		ENSG00000085276
		ENSG00000202125
		ENSG00000207361
		ENSG00000248367
		ENSG00000219891
		ENSG00000234232
		ENSG00000234969
		ENSG00000227165
		ENSG00000110852
		ENSG00000273253
		ENSG00000200893
		ENSG00000237911
		ENSG00000273321
		ENSG00000007216
		ENSG00000256817
		ENSG00000252236
		ENSG00000249540
		ENSG00000251216
		ENSG00000114547
		ENSG00000141665
		ENSG00000188761
		ENSG00000149926
		ENSG00000273507
		ENSG00000275476
		ENSG00000176723
		ENSG00000201348
		ENSG00000207518
		ENSG00000284258
		ENSG00000232104
		ENSG00000237276
		ENSG00000278424
		ENSG00000233646
		ENSG00000212146
		ENSG00000244297
		ENSG00000234902
		ENSG00000225062
		ENSG00000213759
		ENSG00000196684
		ENSG00000279170
		ENSG00000245832
		ENSG00000206592
		ENSG00000213916
		ENSG00000279149
		ENSG00000271010
		ENSG00000228081
		ENSG00000281831
		ENSG00000274034
		ENSG00000224292
		ENSG00000183206
		ENSG00000212102
		ENSG00000206889
		ENSG00000230712
		ENSG00000253674
		ENSG00000227078
		ENSG00000265279
		ENSG00000240045
		ENSG00000103710
		ENSG00000261462
		ENSG00000206627
		ENSG00000235101
		ENSG00000238077
		ENSG00000188001
		ENSG00000171502
		ENSG00000123838
		ENSG00000279882
		ENSG00000270765
		ENSG00000229756
		ENSG00000228314
		ENSG00000163661
		ENSG00000144057
		ENSG00000198625
		ENSG00000256011
		ENSG00000228611
		ENSG00000215286
		ENSG00000267177
		ENSG00000231053
		ENSG00000269476
		ENSG00000233702
		ENSG00000255186
		ENSG00000275585
		ENSG00000256514
		ENSG00000094963
		ENSG00000241045
		ENSG00000224674
		ENSG00000238399
		ENSG00000232735
		ENSG00000264200
		ENSG00000270727
		ENSG00000255006
		ENSG00000248802
		ENSG00000223519
		ENSG00000245466
		ENSG00000224762
		ENSG00000200670
		ENSG00000267283
		ENSG00000174667
		ENSG00000224505
		ENSG00000260896
		ENSG00000236577
		ENSG00000275119
		ENSG00000205274
		ENSG00000253013
		ENSG00000273143
		ENSG00000254099
		ENSG00000140839
		ENSG00000166317
		ENSG00000124568
		ENSG00000225953
		ENSG00000261826
		ENSG00000173376
		ENSG00000225680
		ENSG00000164418
		ENSG00000264975
		ENSG00000231764
		ENSG00000251739
		ENSG00000206787
		ENSG00000241828
		ENSG00000227714
		ENSG00000250644
		ENSG00000252129
		ENSG00000225214
		ENSG00000250808
		ENSG00000224050
		ENSG00000215018
		ENSG00000237063
		ENSG00000279964
		ENSG00000004799
		ENSG00000280075
		ENSG00000113889
		ENSG00000130517
		ENSG00000231108
		ENSG00000175538
		ENSG00000199598
		ENSG00000252757
		ENSG00000177138
		ENSG00000197446
		ENSG00000277690
		ENSG00000261649
		ENSG00000253383
		ENSG00000179141
		ENSG00000240443
		ENSG00000160188
		ENSG00000236617
		ENSG00000260941
		ENSG00000284719
		ENSG00000261595
Down 0.25_8h Down 0.5_24h Down 0.5_8h	137	ENSG00000167798
		ENSG00000216179
		ENSG00000269155
		ENSG00000270178
		ENSG00000204291
		ENSG00000270106
		ENSG00000111452
		ENSG00000232586
		ENSG00000244380
		ENSG00000257918
		ENSG00000236662
		ENSG00000225636
		ENSG00000273398
		ENSG00000240265
		ENSG00000204816
		ENSG00000273980
		ENSG00000156042
		ENSG00000226413
		ENSG00000234184
		ENSG00000202399
		ENSG00000240393
		ENSG00000275567
		ENSG00000205822
		ENSG00000230435
		ENSG00000253356
		ENSG00000264985
		ENSG00000276965
		ENSG00000229786
		ENSG00000283853
		ENSG00000253986
		ENSG00000248895
		ENSG00000252639
		ENSG00000089847
		ENSG00000255730
		ENSG00000164651
		ENSG00000197013
		ENSG00000261368
		ENSG00000251830
		ENSG00000236137
		ENSG00000277678
		ENSG00000168546
		ENSG00000228429
		ENSG00000235929
		ENSG00000271425
		ENSG00000185863
		ENSG00000270136
		ENSG00000216829
		ENSG00000257146
		ENSG00000238795
		ENSG00000222691
		ENSG00000280305
		ENSG00000251685
		ENSG00000279525
		ENSG00000263096
		ENSG00000258957
		ENSG00000179059
		ENSG00000259345
		ENSG00000250815
		ENSG00000255245
		ENSG00000275229
		ENSG00000227177
		ENSG00000072182
		ENSG00000157654
		ENSG00000223625
		ENSG00000207827
		ENSG00000265369
		ENSG00000259873
		ENSG00000267630
		ENSG00000221496
		ENSG00000205704
		ENSG00000273107
		ENSG00000256742
		ENSG00000256146
		ENSG00000279756
		ENSG00000259041
		ENSG00000196472
		ENSG00000221038
		ENSG00000128253
		ENSG00000258491
		ENSG00000258774
		ENSG00000251350
		ENSG00000238610
		ENSG00000272566
		ENSG00000258552
		ENSG00000249681
		ENSG00000272186
		ENSG00000279429
		ENSG00000227857
		ENSG00000134339
		ENSG00000238190
		ENSG00000266844
		ENSG00000270098
		ENSG00000166523
		ENSG00000265083
		ENSG00000229278
		ENSG00000074706
		ENSG00000235901
		ENSG00000167011
		ENSG00000261480
		ENSG00000070526
		ENSG00000236700
		ENSG00000259970
		ENSG00000279954
		ENSG00000183346
		ENSG00000261965
		ENSG00000200257
		ENSG00000233860
		ENSG00000274510
		ENSG00000253263
		ENSG00000270627
		ENSG00000249816
		ENSG00000124205
		ENSG00000262633
		ENSG00000277422
		ENSG00000252105
		ENSG00000178654
		ENSG00000254512
		ENSG00000205864
		ENSG00000183248
		ENSG00000168421
		ENSG00000235078
		ENSG00000284237
		ENSG00000237099
		ENSG00000233944
		ENSG00000196361
		ENSG00000271158
		ENSG00000131831
		ENSG00000228489
		ENSG00000207736
		ENSG00000042304
		ENSG00000258901
		ENSG00000263744
		ENSG00000267277
		ENSG00000269191
		ENSG00000268119
		ENSG00000255808
		ENSG00000206820
Down 0.25_24h Down 0.25_8h Down 0.5_24h	101	ENSG00000271392
		ENSG00000275898
		ENSG00000252867
		ENSG00000228013
		ENSG00000249396
		ENSG00000147488
		ENSG00000257900
		ENSG00000273971
		ENSG00000224683
		ENSG00000251165
		ENSG00000259024
		ENSG00000207293
		ENSG00000129910
		ENSG00000266738
		ENSG00000215023
		ENSG00000133687
		ENSG00000250231
		ENSG00000248358
		ENSG00000197991
		ENSG00000206703
		ENSG00000255524
		ENSG00000171747
		ENSG00000257823
		ENSG00000284743
		ENSG00000230835
		ENSG00000222472
		ENSG00000251054
		ENSG00000242296
		ENSG00000243220
		ENSG00000248596
		ENSG00000236794
		ENSG00000283098
		ENSG00000225465
		ENSG00000163114
		ENSG00000226883
		ENSG00000206997
		ENSG00000278720
		ENSG00000236503
		ENSG00000203697
		ENSG00000240449
		ENSG00000243055
		ENSG00000282317
		ENSG00000283417
		ENSG00000252322
		ENSG00000248529
		ENSG00000231858
		ENSG00000243414
		ENSG00000199469
		ENSG00000105369
		ENSG00000235267
		ENSG00000268204
		ENSG00000169906
		ENSG00000212293
		ENSG00000269916
		ENSG00000144648
		ENSG00000253317
		ENSG00000066056
		ENSG00000273313
		ENSG00000255652
		ENSG00000234008
		ENSG00000267466
		ENSG00000227617
		ENSG00000248931
		ENSG00000112077
		ENSG00000185101
		ENSG00000259521
		ENSG00000268681
		ENSG00000266957
		ENSG00000275110
		ENSG00000272334
		ENSG00000199881
		ENSG00000260259
		ENSG00000203593
		ENSG00000204965
		ENSG00000201469
		ENSG00000227795
		ENSG00000254423
		ENSG00000112530
		ENSG00000270962
		ENSG00000248873
		ENSG00000243346
		ENSG00000273394
		ENSG00000181626
		ENSG00000115590
		ENSG00000271930
		ENSG00000100170
		ENSG00000125492
		ENSG00000264727
		ENSG00000197249
		ENSG00000279705
		ENSG00000264210
		ENSG00000222760
		ENSG00000214031
		ENSG00000199005
		ENSG00000232081
		ENSG00000279431
		ENSG00000109927
		ENSG00000261633
		ENSG00000258451
		ENSG00000115138
		ENSG00000283871
Down 0.25_24h Down 0.5_24h Down 0.5_8h	187	ENSG00000251050
		ENSG00000138109
		ENSG00000157388
		ENSG00000212359
		ENSG00000255446
		ENSG00000189419
		ENSG00000241213
		ENSG00000141505
		ENSG00000152763
		ENSG00000189157
		ENSG00000154188
		ENSG00000272468
		ENSG00000271985
		ENSG00000229155
		ENSG00000172955
		ENSG00000261427
		ENSG00000259546
		ENSG00000226416
		ENSG00000232399
		ENSG00000249791
		ENSG00000226944
		ENSG00000270482
		ENSG00000229730
		ENSG00000278905
		ENSG00000284740
		ENSG00000184208
		ENSG00000113532
		ENSG00000229871
		ENSG00000253671
		ENSG00000219074
		ENSG00000152154
		ENSG00000201612
		ENSG00000205755
		ENSG00000278100
		ENSG00000223836
		ENSG00000042980
		ENSG00000104808
		ENSG00000263257
		ENSG00000180785
		ENSG00000283064
		ENSG00000170959
		ENSG00000181444
		ENSG00000108375
		ENSG00000222973
		ENSG00000259075
		ENSG00000279337
		ENSG00000259336
		ENSG00000279422
		ENSG00000237773
		ENSG00000269194
		ENSG00000241588
		ENSG00000064787
		ENSG00000214708
		ENSG00000218363
		ENSG00000175311
		ENSG00000203730
		ENSG00000151655
		ENSG00000216365
		ENSG00000164199
		ENSG00000267765
		ENSG00000186340
		ENSG00000205879
		ENSG00000207000
		ENSG00000215478
		ENSG00000264892
		ENSG00000004846
		ENSG00000166750
		ENSG00000268975
		ENSG00000167711
		ENSG00000273866
		ENSG00000134827
		ENSG00000100739
		ENSG00000241269
		ENSG00000251395
		ENSG00000272255
		ENSG00000200197
		ENSG00000050327
		ENSG00000248777
		ENSG00000236279
		ENSG00000102271
		ENSG00000250374
		ENSG00000261572
		ENSG00000233159
		ENSG00000260723
		ENSG00000275915
		ENSG00000132141
		ENSG00000126838
		ENSG00000252994
		ENSG00000258412
		ENSG00000237691
		ENSG00000260518
		ENSG00000252333
		ENSG00000206685
		ENSG00000179477
		ENSG00000224946
		ENSG00000148702
		ENSG00000224769
		ENSG00000055813
		ENSG00000137507
		ENSG00000199901
		ENSG00000241964
		ENSG00000229744
		ENSG00000196275
		ENSG00000181027
		ENSG00000252409
		ENSG00000102387
		ENSG00000248592
		ENSG00000198526
		ENSG00000249104
		ENSG00000162654
		ENSG00000248144
		ENSG00000217268
		ENSG00000198542
		ENSG00000260711
		ENSG00000249312
		ENSG00000214381
		ENSG00000253776
		ENSG00000135373
		ENSG00000202281
		ENSG00000143028
		ENSG00000241261
		ENSG00000279397
		ENSG00000231086
		ENSG00000241037
		ENSG00000259710
		ENSG00000279418
		ENSG00000243509
		ENSG00000276955
		ENSG00000234639
		ENSG00000248482
		ENSG00000224023
		ENSG00000250799
		ENSG00000257786
		ENSG00000233251
		ENSG00000266320
		ENSG00000174469
		ENSG00000223739
		ENSG00000128564
		ENSG00000186198
		ENSG00000264177
		ENSG00000253428
		ENSG00000279114
		ENSG00000230506
		ENSG00000174428
		ENSG00000267166
		ENSG00000278035
		ENSG00000225045
		ENSG00000113721
		ENSG00000261864
		ENSG00000198610
		ENSG00000204556
		ENSG00000162365
		ENSG00000265929
		ENSG00000225476
		ENSG00000274621
		ENSG00000169031
		ENSG00000253952
		ENSG00000270105
		ENSG00000231690
		ENSG00000183484
		ENSG00000156096
		ENSG00000241388
		ENSG00000133962
		ENSG00000160868
		ENSG00000166840
		ENSG00000170099
		ENSG00000254154
		ENSG00000278484
		ENSG00000111644
		ENSG00000239552
		ENSG00000131620
		ENSG00000186204
		ENSG00000273082
		ENSG00000277087
		ENSG00000128383
		ENSG00000168874
		ENSG00000067842
		ENSG00000124507
		ENSG00000197558
		ENSG00000227283
		ENSG00000184489
		ENSG00000171481
		ENSG00000207472
		ENSG00000223181
		ENSG00000249510
		ENSG00000172367
		ENSG00000223393
Down 0.25_8h Down 0.5_8h	1410	ENSG00000275852
		ENSG00000214814
		ENSG00000227109
		ENSG00000111218
		ENSG00000224647
		ENSG00000127529
		ENSG00000123594
		ENSG00000199866
		ENSG00000235100
		ENSG00000236677
		ENSG00000229766
		ENSG00000272375
		ENSG00000176566
		ENSG00000277029
		ENSG00000199959
		ENSG00000265128
		ENSG00000227582
		ENSG00000257379
		ENSG00000279044
		ENSG00000252798
		ENSG00000234890
		ENSG00000258551
		ENSG00000197943
		ENSG00000261757
		ENSG00000259399
		ENSG00000283845
		ENSG00000219188
		ENSG00000116785
		ENSG00000283733
		ENSG00000253138
		ENSG00000226272
		ENSG00000243797
		ENSG00000171840
		ENSG00000254131
		ENSG00000242515
		ENSG00000074803
		ENSG00000232314
		ENSG00000252148
		ENSG00000126233
		ENSG00000274625
		ENSG00000229238
		ENSG00000170989
		ENSG00000078053
		ENSG00000167656
		ENSG00000254736
		ENSG00000227597
		ENSG00000254445
		ENSG00000250910
		ENSG00000236171
		ENSG00000283468
		ENSG00000272970
		ENSG00000260163
		ENSG00000278875
		ENSG00000277764
		ENSG00000175809
		ENSG00000227115
		ENSG00000206557
		ENSG00000227463
		ENSG00000272265
		ENSG00000168828
		ENSG00000228695
		ENSG00000254913
		ENSG00000279881
		ENSG00000257660
		ENSG00000204704
		ENSG00000221525
		ENSG00000265289
		ENSG00000238065
		ENSG00000262381
		ENSG00000199289
		ENSG00000271249
		ENSG00000199360
		ENSG00000231305
		ENSG00000229873
		ENSG00000233547
		ENSG00000179915
		ENSG00000239199
		ENSG00000233791
		ENSG00000284380
		ENSG00000279022
		ENSG00000239143
		ENSG00000268583
		ENSG00000248713
		ENSG00000253175
		ENSG00000244756
		ENSG00000105143
		ENSG00000273549
		ENSG00000244000
		ENSG00000239122
		ENSG00000248388
		ENSG00000237849
		ENSG00000196098
		ENSG00000270141
		ENSG00000271105
		ENSG00000263809
		ENSG00000207951
		ENSG00000212395
		ENSG00000233318
		ENSG00000135114
		ENSG00000261741
		ENSG00000277590
		ENSG00000143127
		ENSG00000238243
		ENSG00000248506
		ENSG00000283117
		ENSG00000207297
		ENSG00000197421
		ENSG00000284288
		ENSG00000274848
		ENSG00000205361
		ENSG00000237705
		ENSG00000276221
		ENSG00000230571
		ENSG00000252764
		ENSG00000201687
		ENSG00000275665
		ENSG00000205517
		ENSG00000261340
		ENSG00000270449
		ENSG00000201954
		ENSG00000232352
		ENSG00000206120
		ENSG00000227467
		ENSG00000235142
		ENSG00000264119
		ENSG00000272692
		ENSG00000071909
		ENSG00000250608
		ENSG00000272745
		ENSG00000235099
		ENSG00000218991
		ENSG00000206337
		ENSG00000248933
		ENSG00000227788
		ENSG00000234192
		ENSG00000093072
		ENSG00000252317
		ENSG00000259095
		ENSG00000199332
		ENSG00000147588
		ENSG00000260451
		ENSG00000272485
		ENSG00000172460
		ENSG00000238180
		ENSG00000259281
		ENSG00000222308
		ENSG00000231694
		ENSG00000215409
		ENSG00000164761
		ENSG00000186453
		ENSG00000168852
		ENSG00000262621
		ENSG00000249610
		ENSG00000145002
		ENSG00000244083
		ENSG00000268580
		ENSG00000270576
		ENSG00000226321
		ENSG00000152784
		ENSG00000264175
		ENSG00000279933
		ENSG00000254636
		ENSG00000215506
		ENSG00000220125
		ENSG00000218868
		ENSG00000226668
		ENSG00000137285
		ENSG00000252563
		ENSG00000270639
		ENSG00000240027
		ENSG00000253198
		ENSG00000250768
		ENSG00000249894
		ENSG00000256892
		ENSG00000183775
		ENSG00000233357
		ENSG00000164400
		ENSG00000226925
		ENSG00000226665
		ENSG00000252860
		ENSG00000260564
		ENSG00000256612
		ENSG00000175773
		ENSG00000278206
		ENSG00000231483
		ENSG00000276251
		ENSG00000273370
		ENSG00000230819
		ENSG00000232455
		ENSG00000207632
		ENSG00000122852
		ENSG00000249429
		ENSG00000207128
		ENSG00000234586
		ENSG00000227350
		ENSG00000250634
		ENSG00000230611
		ENSG00000258311
		ENSG00000253258
		ENSG00000213435
		ENSG00000258275
		ENSG00000222658
		ENSG00000265423
		ENSG00000258586
		ENSG00000230950
		ENSG00000231471
		ENSG00000255421
		ENSG00000273102
		ENSG00000199161
		ENSG00000204872
		ENSG00000226717
		ENSG00000240089
		ENSG00000253813
		ENSG00000226028
		ENSG00000224595
		ENSG00000233225
		ENSG00000229716
		ENSG00000242288
		ENSG00000252521
		ENSG00000256589
		ENSG00000255490
		ENSG00000255365
		ENSG00000274269
		ENSG00000235575
		ENSG00000278934
		ENSG00000214200
		ENSG00000282246
		ENSG00000279935
		ENSG00000255919
		ENSG00000259791
		ENSG00000228727
		ENSG00000272865
		ENSG00000236333
		ENSG00000229750
		ENSG00000226854
		ENSG00000264201
		ENSG00000204610
		ENSG00000242811
		ENSG00000229031
		ENSG00000197849
		ENSG00000236861
		ENSG00000266668
		ENSG00000257038
		ENSG00000167311
		ENSG00000229267
		ENSG00000199426
		ENSG00000248727
		ENSG00000265008
		ENSG00000232774
		ENSG00000283270
		ENSG00000274170
		ENSG00000254063
		ENSG00000267388
		ENSG00000240021
		ENSG00000240875
		ENSG00000246528
		ENSG00000276036
		ENSG00000226888
		ENSG00000254501
		ENSG00000231967
		ENSG00000258877
		ENSG00000259550
		ENSG00000232091
		ENSG00000274425
		ENSG00000224761
		ENSG00000259504
		ENSG00000206944
		ENSG00000255973
		ENSG00000181927
		ENSG00000237446
		ENSG00000257443
		ENSG00000207613
		ENSG00000270868
		ENSG00000223318
		ENSG00000178078
		ENSG00000237926
		ENSG00000270754
		ENSG00000268992
		ENSG00000254560
		ENSG00000162594
		ENSG00000201412
		ENSG00000252643
		ENSG00000267501
		ENSG00000252040
		ENSG00000227001
		ENSG00000249706
		ENSG00000163701
		ENSG00000216938
		ENSG00000255511
		ENSG00000269427
		ENSG00000253504
		ENSG00000142609
		ENSG00000270499
		ENSG00000065371
		ENSG00000134258
		ENSG00000207058
		ENSG00000198574
		ENSG00000170748
		ENSG00000259160
		ENSG00000228350
		ENSG00000082929
		ENSG00000225638
		ENSG00000277315
		ENSG00000222955
		ENSG00000225528
		ENSG00000277739
		ENSG00000222068
		ENSG00000254953
		ENSG00000246211
		ENSG00000222028
		ENSG00000228010
		ENSG00000147873
		ENSG00000215952
		ENSG00000260552
		ENSG00000240739
		ENSG00000258288
		ENSG00000172938
		ENSG00000266117
		ENSG00000250392
		ENSG00000208032
		ENSG00000260678
		ENSG00000275458
		ENSG00000229044
		ENSG00000221039
		ENSG00000283174
		ENSG00000260795
		ENSG00000224732
		ENSG00000197816
		ENSG00000196427
		ENSG00000223075
		ENSG00000262980
		ENSG00000228414
		ENSG00000254929
		ENSG00000271250
		ENSG00000267675
		ENSG00000241105
		ENSG00000250732
		ENSG00000236280
		ENSG00000256377
		ENSG00000253224
		ENSG00000272279
		ENSG00000199394
		ENSG00000248920
		ENSG00000267554
		ENSG00000233550
		ENSG00000214457
		ENSG00000189090
		ENSG00000254076
		ENSG00000103200
		ENSG00000248308
		ENSG00000226726
		ENSG00000152463
		ENSG00000267781
		ENSG00000217044
		ENSG00000259776
		ENSG00000196420
		ENSG00000200446
		ENSG00000248547
		ENSG00000203907
		ENSG00000284130
		ENSG00000240198
		ENSG00000274845
		ENSG00000264548
		ENSG00000115085
		ENSG00000201633
		ENSG00000228376
		ENSG00000201945
		ENSG00000242764
		ENSG00000202044
		ENSG00000275726
		ENSG00000228098
		ENSG00000283558
		ENSG00000237133
		ENSG00000230549
		ENSG00000199468
		ENSG00000244292
		ENSG00000144619
		ENSG00000273199
		ENSG00000251276
		ENSG00000260761
		ENSG00000270209
		ENSG00000230137
		ENSG00000207769
		ENSG00000248778
		ENSG00000177800
		ENSG00000267241
		ENSG00000234415
		ENSG00000225683
		ENSG00000222880
		ENSG00000249074
		ENSG00000229619
		ENSG00000214880
		ENSG00000199638
		ENSG00000243136
		ENSG00000249367
		ENSG00000204117
		ENSG00000223777
		ENSG00000275572
		ENSG00000206996
		ENSG00000200550
		ENSG00000224231
		ENSG00000231293
		ENSG00000271868
		ENSG00000213996
		ENSG00000198829
		ENSG00000229985
		ENSG00000201023
		ENSG00000122592
		ENSG00000125999
		ENSG00000226034
		ENSG00000279925
		ENSG00000149435
		ENSG00000238153
		ENSG00000254205
		ENSG00000275154
		ENSG00000231431
		ENSG00000265658
		ENSG00000278865
		ENSG00000283159
		ENSG00000272746
		ENSG00000242242
		ENSG00000255916
		ENSG00000236153
		ENSG00000250573
		ENSG00000206898
		ENSG00000223373
		ENSG00000201518
		ENSG00000171051
		ENSG00000108442
		ENSG00000242983
		ENSG00000267065
		ENSG00000230119
		ENSG00000267287
		ENSG00000251468
		ENSG00000251837
		ENSG00000202331
		ENSG00000228153
		ENSG00000259432
		ENSG00000258013
		ENSG00000249944
		ENSG00000212520
		ENSG00000275562
		ENSG00000229064
		ENSG00000161905
		ENSG00000090339
		ENSG00000283047
		ENSG00000258970
		ENSG00000253408
		ENSG00000248607
		ENSG00000264954
		ENSG00000237979
		ENSG00000175202
		ENSG00000252097
		ENSG00000232557
		ENSG00000197253
		ENSG00000204183
		ENSG00000222426
		ENSG00000231851
		ENSG00000198414
		ENSG00000234895
		ENSG00000277341
		ENSG00000252863
		ENSG00000284617
		ENSG00000233952
		ENSG00000267532
		ENSG00000115165
		ENSG00000233472
		ENSG00000201560
		ENSG00000259138
		ENSG00000254887
		ENSG00000166603
		ENSG00000266307
		ENSG00000230741
		ENSG00000233916
		ENSG00000272081
		ENSG00000120337
		ENSG00000272741
		ENSG00000266423
		ENSG00000135355
		ENSG00000264294
		ENSG00000215217
		ENSG00000225644
		ENSG00000200626
		ENSG00000227355
		ENSG00000261385
		ENSG00000202380
		ENSG00000224429
		ENSG00000188523
		ENSG00000254647
		ENSG00000255395
		ENSG00000102145
		ENSG00000251407
		ENSG00000273077
		ENSG00000212280
		ENSG00000179165
		ENSG00000259542
		ENSG00000054356
		ENSG00000206710
		ENSG00000239194
		ENSG00000234818
		ENSG00000279771
		ENSG00000201542
		ENSG00000231274
		ENSG00000119913
		ENSG00000235102
		ENSG00000222182
		ENSG00000170324
		ENSG00000258595
		ENSG00000259450
		ENSG00000238417
		ENSG00000280423
		ENSG00000202275
		ENSG00000207571
		ENSG00000239708
		ENSG00000244062
		ENSG00000276542
		ENSG00000268533
		ENSG00000280360
		ENSG00000181282
		ENSG00000132832
		ENSG00000233473
		ENSG00000274306
		ENSG00000212496
		ENSG00000252011
		ENSG00000207410
		ENSG00000243440
		ENSG00000200664
		ENSG00000114541
		ENSG00000206113
		ENSG00000271382
		ENSG00000252319
		ENSG00000226155
		ENSG00000225945
		ENSG00000112212
		ENSG00000151303
		ENSG00000198573
		ENSG00000159202
		ENSG00000269944
		ENSG00000238111
		ENSG00000241641
		ENSG00000133256
		ENSG00000198788
		ENSG00000258611
		ENSG00000236393
		ENSG00000182111
		ENSG00000280131
		ENSG00000260674
		ENSG00000252615
		ENSG00000230393
		ENSG00000283891
		ENSG00000220733
		ENSG00000196581
		ENSG00000224592
		ENSG00000201550
		ENSG00000229423
		ENSG00000123342
		ENSG00000273876
		ENSG00000166529
		ENSG00000222370
		ENSG00000241818
		ENSG00000201557
		ENSG00000259715
		ENSG00000275215
		ENSG00000261122
		ENSG00000150275
		ENSG00000278189
		ENSG00000212257
		ENSG00000213976
		ENSG00000162643
		ENSG00000233968
		ENSG00000054179
		ENSG00000242151
		ENSG00000213886
		ENSG00000125816
		ENSG00000253942
		ENSG00000250049
		ENSG00000239128
		ENSG00000253057
		ENSG00000255481
		ENSG00000248690
		ENSG00000254940
		ENSG00000270659
		ENSG00000179774
		ENSG00000207154
		ENSG00000101448
		ENSG00000172900
		ENSG00000265319
		ENSG00000224295
		ENSG00000259831
		ENSG00000234355
		ENSG00000197385
		ENSG00000254119
		ENSG00000254571
		ENSG00000230684
		ENSG00000234350
		ENSG00000110944
		ENSG00000253430
		ENSG00000252507
		ENSG00000271207
		ENSG00000244130
		ENSG00000273006
		ENSG00000266290
		ENSG00000227848
		ENSG00000163075
		ENSG00000248285
		ENSG00000263790
		ENSG00000226752
		ENSG00000204702
		ENSG00000264614
		ENSG00000272189
		ENSG00000130287
		ENSG00000273249
		ENSG00000223643
		ENSG00000067082
		ENSG00000107317
		ENSG00000260413
		ENSG00000242979
		ENSG00000147262
		ENSG00000255415
		ENSG00000199373
		ENSG00000222920
		ENSG00000203546
		ENSG00000138823
		ENSG00000214374
		ENSG00000250074
		ENSG00000202050
		ENSG00000242836
		ENSG00000164691
		ENSG00000152213
		ENSG00000279701
		ENSG00000270893
		ENSG00000132874
		ENSG00000252212
		ENSG00000261540
		ENSG00000237601
		ENSG00000280238
		ENSG00000140368
		ENSG00000261222
		ENSG00000267054
		ENSG00000252390
		ENSG00000283247
		ENSG00000170820
		ENSG00000130035
		ENSG00000234805
		ENSG00000220540
		ENSG00000238143
		ENSG00000223652
		ENSG00000172772
		ENSG00000260482
		ENSG00000235571
		ENSG00000229380
		ENSG00000243321
		ENSG00000223485
		ENSG00000224204
		ENSG00000114455
		ENSG00000199944
		ENSG00000277446
		ENSG00000128250
		ENSG00000200871
		ENSG00000188425
		ENSG00000168843
		ENSG00000274275
		ENSG00000232311
		ENSG00000260372
		ENSG00000255172
		ENSG00000254415
		ENSG00000187268
		ENSG00000100433
		ENSG00000224590
		ENSG00000217791
		ENSG00000164393
		ENSG00000258786
		ENSG00000272141
		ENSG00000169435
		ENSG00000241829
		ENSG00000257879
		ENSG00000200708
		ENSG00000269891
		ENSG00000170231
		ENSG00000163581
		ENSG00000230327
		ENSG00000242852
		ENSG00000139797
		ENSG00000213498
		ENSG00000207983
		ENSG00000197308
		ENSG00000135077
		ENSG00000249380
		ENSG00000237731
		ENSG00000136999
		ENSG00000225625
		ENSG00000248714
		ENSG00000279655
		ENSG00000279437
		ENSG00000222185
		ENSG00000201746
		ENSG00000250268
		ENSG00000259978
		ENSG00000227017
		ENSG00000138039
		ENSG00000254028
		ENSG00000112333
		ENSG00000232401
		ENSG00000183019
		ENSG00000006210
		ENSG00000130167
		ENSG00000174255
		ENSG00000265240
		ENSG00000238709
		ENSG00000120907
		ENSG00000220730
		ENSG00000129244
		ENSG00000283320
		ENSG00000089101
		ENSG00000207381
		ENSG00000200525
		ENSG00000276261
		ENSG00000165457
		ENSG00000196844
		ENSG00000283515
		ENSG00000143878
		ENSG00000273758
		ENSG00000232989
		ENSG00000171551
		ENSG00000270441
		ENSG00000265833
		ENSG00000270936
		ENSG00000228014
		ENSG00000280182
		ENSG00000162645
		ENSG00000267669
		ENSG00000235482
		ENSG00000105609
		ENSG00000248926
		ENSG00000252422
		ENSG00000231553
		ENSG00000124302
		ENSG00000179873
		ENSG00000277455
		ENSG00000248712
		ENSG00000255227
		ENSG00000233694
		ENSG00000182083
		ENSG00000204952
		ENSG00000262881
		ENSG00000198681
		ENSG00000261668
		ENSG00000227465
		ENSG00000266770
		ENSG00000205611
		ENSG00000230391
		ENSG00000258822
		ENSG00000159208
		ENSG00000262668
		ENSG00000201077
		ENSG00000199092
		ENSG00000216307
		ENSG00000225956
		ENSG00000275454
		ENSG00000260078
		ENSG00000233828
		ENSG00000283392
		ENSG00000066230
		ENSG00000262890
		ENSG00000252847
		ENSG00000235524
		ENSG00000230424
		ENSG00000204006
		ENSG00000233221
		ENSG00000182183
		ENSG00000184408
		ENSG00000268434
		ENSG00000207363
		ENSG00000230148
		ENSG00000221365
		ENSG00000243709
		ENSG00000222578
		ENSG00000222398
		ENSG00000278196
		ENSG00000279171
		ENSG00000261298
		ENSG00000206145
		ENSG00000207756
		ENSG00000101323
		ENSG00000254451
		ENSG00000229492
		ENSG00000274049
		ENSG00000249131
		ENSG00000254900
		ENSG00000225083
		ENSG00000161381
		ENSG00000238427
		ENSG00000233752
		ENSG00000238035
		ENSG00000243568
		ENSG00000212569
		ENSG00000250099
		ENSG00000214526
		ENSG00000181786
		ENSG00000216902
		ENSG00000248745
		ENSG00000275674
		ENSG00000255534
		ENSG00000233449
		ENSG00000226960
		ENSG00000254557
		ENSG00000225725
		ENSG00000238211
		ENSG00000235785
		ENSG00000166869
		ENSG00000222560
		ENSG00000251718
		ENSG00000168004
		ENSG00000226297
		ENSG00000260247
		ENSG00000216548
		ENSG00000229192
		ENSG00000264707
		ENSG00000243702
		ENSG00000239405
		ENSG00000234382
		ENSG00000237859
		ENSG00000242807
		ENSG00000202440
		ENSG00000223302
		ENSG00000239586
		ENSG00000124491
		ENSG00000118473
		ENSG00000231491
		ENSG00000273214
		ENSG00000188958
		ENSG00000185958
		ENSG00000252443
		ENSG00000233285
		ENSG00000219361
		ENSG00000230047
		ENSG00000204099
		ENSG00000256234
		ENSG00000248516
		ENSG00000267767
		ENSG00000174059
		ENSG00000267271
		ENSG00000251698
		ENSG00000266407
		ENSG00000144452
		ENSG00000184106
		ENSG00000273333
		ENSG00000202279
		ENSG00000224019
		ENSG00000231984
		ENSG00000232922
		ENSG00000273181
		ENSG00000264613
		ENSG00000184221
		ENSG00000229142
		ENSG00000283207
		ENSG00000184188
		ENSG00000237178
		ENSG00000207162
		ENSG00000147571
		ENSG00000256966
		ENSG00000265176
		ENSG00000127533
		ENSG00000258082
		ENSG00000235033
		ENSG00000223190
		ENSG00000216475
		ENSG00000248605
		ENSG00000172748
		ENSG00000161132
		ENSG00000272507
		ENSG00000238288
		ENSG00000227358
		ENSG00000234352
		ENSG00000175920
		ENSG00000226853
		ENSG00000253379
		ENSG00000226577
		ENSG00000235997
		ENSG00000225611
		ENSG00000259648
		ENSG00000228360
		ENSG00000074660
		ENSG00000245648
		ENSG00000283580
		ENSG00000270713
		ENSG00000228536
		ENSG00000233445
		ENSG00000255104
		ENSG00000138650
		ENSG00000198077
		ENSG00000284071
		ENSG00000234185
		ENSG00000250145
		ENSG00000278381
		ENSG00000279642
		ENSG00000197683
		ENSG00000227432
		ENSG00000234222
		ENSG00000230292
		ENSG00000272650
		ENSG00000237352
		ENSG00000225003
		ENSG00000199291
		ENSG00000261904
		ENSG00000107295
		ENSG00000207758
		ENSG00000199459
		ENSG00000272281
		ENSG00000182652
		ENSG00000267389
		ENSG00000165084
		ENSG00000149043
		ENSG00000256071
		ENSG00000185271
		ENSG00000253932
		ENSG00000222778
		ENSG00000252247
		ENSG00000220349
		ENSG00000263666
		ENSG00000252660
		ENSG00000212551
		ENSG00000266515
		ENSG00000242943
		ENSG00000119660
		ENSG00000201987
		ENSG00000270835
		ENSG00000259256
		ENSG00000105929
		ENSG00000258112
		ENSG00000185742
		ENSG00000200318
		ENSG00000242795
		ENSG00000105559
		ENSG00000232601
		ENSG00000226981
		ENSG00000257905
		ENSG00000279409
		ENSG00000232874
		ENSG00000230384
		ENSG00000250420
		ENSG00000155011
		ENSG00000252046
		ENSG00000237359
		ENSG00000243033
		ENSG00000255507
		ENSG00000283166
		ENSG00000260996
		ENSG00000227301
		ENSG00000213588
		ENSG00000187847
		ENSG00000252545
		ENSG00000224887
		ENSG00000206911
		ENSG00000271792
		ENSG00000168621
		ENSG00000204532
		ENSG00000237217
		ENSG00000244281
		ENSG00000254127
		ENSG00000199223
		ENSG00000240680
		ENSG00000170827
		ENSG00000258494
		ENSG00000270634
		ENSG00000251835
		ENSG00000263436
		ENSG00000225914
		ENSG00000204314
		ENSG00000278569
		ENSG00000252489
		ENSG00000197171
		ENSG00000159871
		ENSG00000157703
		ENSG00000232337
		ENSG00000214402
		ENSG00000252581
		ENSG00000237897
		ENSG00000221996
		ENSG00000263105
		ENSG00000256650
		ENSG00000206741
		ENSG00000253872
		ENSG00000201086
		ENSG00000187103
		ENSG00000228700
		ENSG00000240487
		ENSG00000252569
		ENSG00000260798
		ENSG00000228807
		ENSG00000278146
		ENSG00000099866
		ENSG00000175520
		ENSG00000222107
		ENSG00000278838
		ENSG00000227660
		ENSG00000238283
		ENSG00000233688
		ENSG00000227551
		ENSG00000234380
		ENSG00000163239
		ENSG00000079215
		ENSG00000257510
		ENSG00000277553
		ENSG00000283371
		ENSG00000253917
		ENSG00000235310
		ENSG00000269694
		ENSG00000135549
		ENSG00000228595
		ENSG00000266916
		ENSG00000163645
		ENSG00000235911
		ENSG00000274637
		ENSG00000258726
		ENSG00000276612
		ENSG00000212358
		ENSG00000217334
		ENSG00000125965
		ENSG00000092758
		ENSG00000232459
		ENSG00000224067
		ENSG00000261754
		ENSG00000253743
		ENSG00000207749
		ENSG00000207113
		ENSG00000207104
		ENSG00000260165
		ENSG00000202159
		ENSG00000283155
		ENSG00000252412
		ENSG00000274670
		ENSG00000233939
		ENSG00000240253
		ENSG00000283692
		ENSG00000126733
		ENSG00000254980
		ENSG00000185467
		ENSG00000214198
		ENSG00000276514
		ENSG00000014257
		ENSG00000233263
		ENSG00000253217
		ENSG00000273287
		ENSG00000196634
		ENSG00000155066
		ENSG00000131721
		ENSG00000213529
		ENSG00000232542
		ENSG00000274397
		ENSG00000255467
		ENSG00000258894
		ENSG00000231297
		ENSG00000284242
		ENSG00000255045
		ENSG00000202144
		ENSG00000249153
		ENSG00000271730
		ENSG00000237663
		ENSG00000212939
		ENSG00000262079
		ENSG00000270384
		ENSG00000102755
		ENSG00000279770
		ENSG00000271627
		ENSG00000273003
		ENSG00000202034
		ENSG00000255337
		ENSG00000279617
		ENSG00000271480
		ENSG00000095713
		ENSG00000253234
		ENSG00000232805
		ENSG00000223953
		ENSG00000251773
		ENSG00000270243
		ENSG00000232982
		ENSG00000154258
		ENSG00000198857
		ENSG00000272967
		ENSG00000235301
		ENSG00000243289
		ENSG00000213265
		ENSG00000254862
		ENSG00000200008
		ENSG00000280422
		ENSG00000250041
		ENSG00000253798
		ENSG00000231256
		ENSG00000226254
		ENSG00000242779
		ENSG00000248616
		ENSG00000269356
		ENSG00000237549
		ENSG00000252812
		ENSG00000257612
		ENSG00000261147
		ENSG00000131233
		ENSG00000163098
		ENSG00000189145
		ENSG00000236386
		ENSG00000255556
		ENSG00000137814
		ENSG00000137745
		ENSG00000251349
		ENSG00000258334
		ENSG00000280079
		ENSG00000229622
		ENSG00000280270
		ENSG00000239263
		ENSG00000254364
		ENSG00000271219
		ENSG00000234689
		ENSG00000215630
		ENSG00000267387
		ENSG00000230755
		ENSG00000214976
		ENSG00000240934
		ENSG00000251864
		ENSG00000213988
		ENSG00000243729
		ENSG00000259833
		ENSG00000237378
		ENSG00000251408
		ENSG00000232370
		ENSG00000257517
		ENSG00000270828
		ENSG00000268678
		ENSG00000229661
		ENSG00000206659
		ENSG00000156097
		ENSG00000212206
		ENSG00000266642
		ENSG00000234700
		ENSG00000277001
		ENSG00000165182
		ENSG00000259441
		ENSG00000253508
		ENSG00000138152
		ENSG00000235015
		ENSG00000213177
		ENSG00000189139
		ENSG00000255266
		ENSG00000234817
		ENSG00000135447
		ENSG00000249092
[truncated: 7,853 more rows]
