# Supplementary material for: ncRNAs Orchestrate Chemosensitivity Induction by Neddylation Blockades
Source: Cancers (Basel). 2024 Feb 18;16(4):825. doi: 10.3390/cancers16040825 (PMC10886669; doi:10.3390/cancers16040825)
Supplement: Supplementary file 1 [file cancers-16-00825-s001.zip › Source Data S2.xlsx]

## Sheet: A_miRNA-snoRNA-snRNA
gene_name	log2FC	-log10pval
RNU6-1200P	-3.39232	0.60206
SNORA31	-3.32193	0.947282
MIR580	-3.05889	1.14792
RNU6-1095P	-3.05889	1.14792
RNU6-188P	-3.05889	0.720145
SNORD114-29	-3.05889	1.14792
RNU2-46P	-2.73697	0.771464
SNORD55	-2.58496	0.60206
5S_rRNA	-2.45943	0.60206
MIR3714	-2.45943	0.60206
MIR409	-2.45943	0.60206
MIR657	-2.45943	0.60206
RN7SKP12	-2.45943	0.60206
RNA5SP33	-2.45943	0.60206
RNU1-62P	-2.45943	0.60206
SNORA18	-2.45943	0.60206
SNORD54	-2.45943	0.60206
Y_RNA	-2.45943	0.60206
Y_RNA	-2.45943	0.60206
RNU6-1257P	-2.42884	1.57819
SNORA26	-2.42884	0.829233
SNORD46	-2.42884	1.57819
RN7SL362P	-2.4021	0.590817
MIR1185-1	-2.32193	0.900782
MIR3163	-2.32193	0.900782
MIR3691	-2.32193	0.900782
MIR541	-2.32193	0.900782
RN7SL26P	-2.32193	0.900782
RNA5SP345	-2.32193	0.900782
RNU6-1250P	-2.32193	0.900782
RNU6-1321P	-2.32193	0.900782
RNU6-150P	-2.32193	0.900782
RNU6-236P	-2.32193	0.900782
RNU6-828P	-2.32193	0.900782
Y_RNA	-2.32193	0.900782
MIR4721	-2.32193	1.10802
SNORD18A	-2.24793	0.60206
MIR3684	-2.20645	0.652742
MIR548O2	-2.20645	0.652742
RNU6-399P	-2.20645	0.940947
SNORA51	-2.20645	1.32733
Y_RNA	-2.20645	0.940947
RN7SL824P	-2.16294	0.553448
MIR5692C2	-1.96829	0.705674
Y_RNA	-1.94342	0.670972
Y_RNA	-1.94342	0.670972
MIR320C1	-1.94342	0.670972
MIR3646	-1.94342	1.27091
RN7SKP96	-1.94342	0.670972
RNU2-72P	-1.94342	1.27091
RNU4-53P	-1.94342	1.27091
RNU6-1203P	-1.94342	1.27091
SNORA27	-1.94342	0.670972
SNORA70F	-1.94342	1.27091
SNORD13P3	-1.94342	1.27091
MIR2053	-1.9386	0.60206
MIR4307HG	-1.9386	0.60206
MIR4308	-1.9386	0.60206
MIR4452	-1.9386	0.60206
MIR4511	-1.9386	0.60206
MIR493	-1.9386	0.60206
MIR542	-1.9386	0.60206
MIR548Q	-1.9386	0.60206
MIR5580	-1.9386	0.60206
MIR599	-1.9386	0.60206
MIR665	-1.9386	0.60206
MIR758	-1.9386	0.60206
MIR921	-1.9386	0.60206
RN7SKP117	-1.9386	0.60206
RN7SKP2	-1.9386	0.60206
RN7SKP244	-1.9386	0.60206
RN7SKP57	-1.9386	0.60206
RN7SKP7	-1.9386	0.60206
RN7SL290P	-1.9386	0.60206
RN7SL51P	-1.9386	0.60206
RN7SL601P	-1.9386	0.60206
RNA5SP156	-1.9386	0.60206
RNA5SP198	-1.9386	0.60206
RNA5SP223	-1.9386	0.60206
RNA5SP325	-1.9386	0.60206
RNA5SP339	-1.9386	0.60206
RNA5SP35	-1.9386	0.60206
RNA5SP379	-1.9386	0.60206
RNA5SP394	-1.9386	0.60206
RNA5SP454	-1.9386	0.60206
RNU1-108P	-1.9386	0.60206
RNU1-8P	-1.9386	0.60206
RNU2-48P	-1.9386	0.60206
RNU2-62P	-1.9386	0.60206
RNU6-1077P	-1.9386	0.60206
RNU6-1115P	-1.9386	0.60206
RNU6-1123P	-1.9386	0.60206
RNU6-1176P	-1.9386	0.60206
RNU6-1183P	-1.9386	0.60206
RNU6-14P	-1.9386	0.60206
RNU6-240P	-1.9386	0.60206
RNU6-391P	-1.9386	0.60206
RNU6-452P	-1.9386	0.60206
RNU6-598P	-1.9386	0.60206
RNU6-59P	-1.9386	0.60206
RNU6-784P	-1.9386	0.60206
RNU6-837P	-1.9386	0.60206
RNU6-842P	-1.9386	0.60206
RNU6-895P	-1.9386	0.60206
RNU6-910P	-1.9386	0.60206
RNU6-918P	-1.9386	0.60206
RNU6-944P	-1.9386	0.60206
RNU6ATAC14P	-1.9386	0.60206
RNY3P11	-1.9386	0.60206
SNORA26	-1.9386	0.60206
SNORA43	-1.9386	0.60206
SNORD51	-1.9386	0.60206
RN7SKP93	-1.80735	0.764419
SNORA74	-1.79837	1.08269
MIR3142HG	-1.76553	0.780285
RN7SL204P	-1.73697	0.650195
RN7SL847P	-1.73697	1.19028
RNU1-100P	-1.73697	1.34518
MIR2052HG	-1.72583	0.549438
MIR4305	-1.72583	0.549438
MIR4698	-1.72583	0.549438
SNORA26	-1.72583	0.549438
RN7SL228P	-1.70044	1.45317
RNA5SP256	-1.63227	1.24996
snoU13	-1.62149	1.09287
Y_RNA	-1.62149	1.09287
Y_RNA	-1.62149	1.09287
5S_rRNA	-1.62149	0.708972
MIR1290	-1.62149	0.708972
MIR301B	-1.62149	1.09287
MIR3118-1	-1.62149	0.708972
MIR328	-1.62149	1.09287
MIR563	-1.62149	1.09287
MIR635	-1.62149	1.09287
MIR6782	-1.62149	1.09287
MIR8085	-1.62149	0.708972
RN7SKP297	-1.62149	0.708972
RNU6-258P	-1.62149	1.09287
RNU6-354P	-1.62149	0.708972
RNU6-549P	-1.62149	1.09287
RNU6-733P	-1.62149	1.09287
RNU6-920P	-1.62149	1.09287
SNORD78	-1.62149	1.09287
RNU6-1206P	-1.60572	1.07313
SNORA62	-1.60572	1.07313
Y_RNA	-1.58496	1.59077
MIR554	-1.58496	0.830962
RNU6-1053P	-1.58496	0.830962
SNORD116-22	-1.58496	0.660471
SNORD7	-1.58496	0.60206
RNU6-570P	-1.51457	0.872687
Y_RNA	-1.5025	0.760984
MIR4473	-1.45943	0.97847
RNU6-1153P	-1.45943	0.889811
SNORA3	-1.45943	0.704583
RNF113B	-1.44746	0.831719
Y_RNA	-1.41504	0.789013
MIR320B2	-1.41504	0.676298
RN7SKP154	-1.41504	1.20181
RNU2-58P	-1.41504	1.00277
RNU6ATAC18P	-1.41504	1.20181
RNU6ATAC7P	-1.41504	0.676298
RN7SL43P	-1.4021	0.560685
SCARNA14	-1.40136	0.844217
SCARNA20	-1.38333	0.862983
U3	-1.38333	0.828223
Y_RNA	-1.38333	0.862983
RN7SL817P	-1.38333	0.828223
RNU6-1136P	-1.38333	0.862983
RNU6-859P	-1.38333	0.828223
MIR561	-1.36257	0.80753
RN7SL218P	-1.34792	0.548513
snoU13	-1.34395	0.528615
MIR126	-1.34395	0.528615
MIR3157	-1.34395	0.528615
MIR7845	-1.34395	0.528615
RNU7-28P	-1.34395	0.528615
RNU7-40P	-1.34395	0.528615
SNORA22	-1.34395	0.528615
SNORD114-15	-1.34395	0.528615
MIR5088	-1.32193	1.07585
MIR638	-1.32193	0.989631
MIR6813	-1.32193	0.989631
RNU6-438P	-1.32193	0.989631
MIRLET7F1	-1.28011	0.633587
RNU6-762P	-1.26303	1.34518
SNORD43	-1.26303	0.70658
Y_RNA	-1.22239	0.546299
Y_RNA	-1.22239	1.27748
MIR3662	-1.22239	1.27748
RNU1-89P	-1.22239	0.703477
RNU2-50P	-1.22239	1.27748
RNU5F-4P	-1.22239	0.703477
RNU6-613P	-1.22239	0.546299
SNORA70	-1.22239	0.830962
RNA5-8SN1	-1.21299	0.525714
RNA5-8SN4	-1.21299	0.525714
RNA5-8SN5	-1.21299	0.525714
RNA5-8SN5	-1.21299	0.525714
RNA5SP469	-1.20645	0.807553
SCARNA24	-1.20645	0.807553
Y_RNA	-1.20645	0.807553
Y_RNA	-1.20645	0.807553
Y_RNA	-1.20645	0.807553
Y_RNA	-1.20645	0.807553
Y_RNA	-1.20645	0.807553
MIR15A	-1.20645	0.807553
MIR222	-1.20645	0.807553
MIR23C	-1.20645	0.807553
MIR2467	-1.20645	0.807553
MIR4304	-1.20645	0.807553
MIR450A2	-1.20645	0.807553
MIR548A3	-1.20645	0.807553
MIR586	-1.20645	0.807553
MIR645	-1.20645	0.807553
MIR6809	-1.20645	0.807553
RNU2-24P	-1.20645	0.807553
RNU6-1107P	-1.20645	0.807553
RNU6-1129P	-1.20645	0.807553
RNU6-16P	-1.20645	0.807553
RNU6-244P	-1.20645	0.807553
RNU6-72P	-1.20645	0.807553
RNU6-742P	-1.20645	0.807553
RNU6-810P	-1.20645	0.807553
RNU6-986P	-1.20645	0.807553
RNU6ATAC30P	-1.20645	0.807553
RNU6ATAC32P	-1.20645	0.807553
RNU7-26P	-1.20645	0.807553
SNORD116-29	-1.20645	0.807553
RNA5SP160	-1.16993	0.60206
Y_RNA	-1.16993	1.20181
RN7SL849P	-1.16993	0.520438
RNU6-190P	-1.16993	0.800822
RNU7-70P	-1.16993	0.800822
MIR4312	-1.1375	1.59077
MIR6087	-1.1375	0.660471
Y_RNA	-1.12029	0.573778
Y_RNA	-1.12029	0.782138
MIR30A	-1.12029	0.782138
MIR3191	-1.12029	0.573778
RNU1-109P	-1.12029	0.782138
RNU2-10P	-1.12029	0.782138
RNU2-11P	-1.12029	0.782138
RNU6-1112P	-1.12029	0.573778
RNU6-1209P	-1.12029	0.782138
RNU6-268P	-1.12029	0.782138
RNU6-290P	-1.12029	0.782138
RNU6-558P	-1.12029	0.782138
RNU6-808P	-1.12029	0.782138
RNU7-170P	-1.12029	0.782138
SNORA48	-1.12029	0.573778
U85056.1	-1.11548	0.60206
RNA5SP111	-1.11548	0.60206
RNA5SP129	-1.11548	0.60206
RNA5SP167	-1.11548	0.60206
RNA5SP168	-1.11548	0.60206
RNA5SP265	-1.11548	0.60206
RNA5SP283	-1.11548	0.60206
RNA5SP29	-1.11548	0.60206
RNA5SP330	-1.11548	0.60206
RNA5SP440	-1.11548	0.60206
RNA5SP445	-1.11548	0.60206
RNA5SP45	-1.11548	0.60206
RNA5SP453	-1.11548	0.60206
RNA5SP473	-1.11548	0.60206
RNA5SP474	-1.11548	0.60206
RNA5SP476	-1.11548	0.60206
RNA5SP513	-1.11548	0.60206
RNGTTP1	-1.11548	0.60206
RNMTL1P1	-1.11548	0.60206
SCARNA17	-1.11548	0.60206
SCARNA17	-1.11548	0.60206
SCARNA17	-1.11548	0.60206
SCARNA6	-1.11548	0.60206
snoU109	-1.11548	0.60206
U1	-1.11548	0.60206
U1	-1.11548	0.60206
U3	-1.11548	0.60206
U3	-1.11548	0.60206
Y_RNA	-1.11548	0.60206
Y_RNA	-1.11548	0.60206
Y_RNA	-1.11548	0.60206
Y_RNA	-1.11548	0.60206
Y_RNA	-1.11548	0.60206
Y_RNA	-1.11548	0.60206
Y_RNA	-1.11548	0.60206
Y_RNA	-1.11548	0.60206
Y_RNA	-1.11548	0.60206
Y_RNA	-1.11548	0.60206
Y_RNA	-1.11548	0.60206
Y_RNA	-1.11548	0.60206
Y_RNA	-1.11548	0.60206
Y_RNA	-1.11548	0.60206
Y_RNA	-1.11548	0.60206
Y_RNA	-1.11548	0.60206
Y_RNA	-1.11548	0.60206
Y_RNA	-1.11548	0.60206
Y_RNA	-1.11548	0.60206
Y_RNA	-1.11548	0.60206
Y_RNA	-1.11548	0.60206
Y_RNA	-1.11548	0.60206
hsa-mir-3158-1	-1.11548	0.60206
MIR103B2	-1.11548	0.60206
MIR1228	-1.11548	0.60206
MIR1255B1	-1.11548	0.60206
MIR1262	-1.11548	0.60206
MIR1286	-1.11548	0.60206
MIR130A	-1.11548	0.60206
MIR146A	-1.11548	0.60206
MIR1537	-1.11548	0.60206
MIR181C	-1.11548	0.60206
MIR191	-1.11548	0.60206
MIR196B	-1.11548	0.60206
MIR200B	-1.11548	0.60206
MIR214	-1.11548	0.60206
MIR299	-1.11548	0.60206
MIR29B1	-1.11548	0.60206
MIR3133	-1.11548	0.60206
MIR3158-1	-1.11548	0.60206
MIR3165	-1.11548	0.60206
MIR3180-5	-1.11548	0.60206
MIR3196	-1.11548	0.60206
MIR3202-1	-1.11548	0.60206
MIR3202-2	-1.11548	0.60206
MIR330	-1.11548	0.60206
MIR340	-1.11548	0.60206
MIR3690	-1.11548	0.60206
MIR370	-1.11548	0.60206
MIR377	-1.11548	0.60206
MIR378D2	-1.11548	0.60206
MIR3911	-1.11548	0.60206
MIR410	-1.11548	0.60206
MIR4300HG	-1.11548	0.60206
MIR4313	-1.11548	0.60206
MIR4319	-1.11548	0.60206
MIR4323	-1.11548	0.60206
MIR4431	-1.11548	0.60206
MIR4454	-1.11548	0.60206
MIR4485	-1.11548	0.60206
MIR450B	-1.11548	0.60206
MIR4534	-1.11548	0.60206
MIR4652	-1.11548	0.60206
MIR4693	-1.11548	0.60206
MIR4757	-1.11548	0.60206
MIR4795	-1.11548	0.60206
MIR497	-1.11548	0.60206
MIR5190	-1.11548	0.60206
MIR532	-1.11548	0.60206
MIR5588	-1.11548	0.60206
MIR588	-1.11548	0.60206
MIR6088	-1.11548	0.60206
MIR609	-1.11548	0.60206
MIR615	-1.11548	0.60206
MIR617	-1.11548	0.60206
MIR6717	-1.11548	0.60206
MIR6814	-1.11548	0.60206
MIR8057	-1.11548	0.60206
MIR8069-1	-1.11548	0.60206
MIR8069-2	-1.11548	0.60206
MIRLET7G	-1.11548	0.60206
RN7SKP100	-1.11548	0.60206
RN7SKP110	-1.11548	0.60206
RN7SKP126	-1.11548	0.60206
RN7SKP195	-1.11548	0.60206
RN7SKP257	-1.11548	0.60206
RN7SKP272	-1.11548	0.60206
RN7SKP279	-1.11548	0.60206
RN7SKP40	-1.11548	0.60206
RN7SL104P	-1.11548	0.60206
RN7SL189P	-1.11548	0.60206
RN7SL241P	-1.11548	0.60206
RN7SL352P	-1.11548	0.60206
RN7SL369P	-1.11548	0.60206
RN7SL465P	-1.11548	0.60206
RN7SL470P	-1.11548	0.60206
RN7SL491P	-1.11548	0.60206
RNU105B	-1.11548	0.60206
RNU1-123P	-1.11548	0.60206
RNU1-138P	-1.11548	0.60206
RNU1-143P	-1.11548	0.60206
RNU1-46P	-1.11548	0.60206
RNU1-55P	-1.11548	0.60206
RNU1-5P	-1.11548	0.60206
RNU1-68P	-1.11548	0.60206
RNU1-94P	-1.11548	0.60206
RNU2-13P	-1.11548	0.60206
RNU4-14P	-1.11548	0.60206
RNU4-43P	-1.11548	0.60206
RNU4-67P	-1.11548	0.60206
RNU4-72P	-1.11548	0.60206
RNU4ATAC15P	-1.11548	0.60206
RNU5D-2P	-1.11548	0.60206
RNU5E-9P	-1.11548	0.60206
RNU6-1085P	-1.11548	0.60206
RNU6-1092P	-1.11548	0.60206
RNU6-1093P	-1.11548	0.60206
RNU6-1192P	-1.11548	0.60206
RNU6-1294P	-1.11548	0.60206
RNU6-1336P	-1.11548	0.60206
RNU6-147P	-1.11548	0.60206
RNU6-157P	-1.11548	0.60206
RNU6-15P	-1.11548	0.60206
RNU6-178P	-1.11548	0.60206
RNU6-197P	-1.11548	0.60206
RNU6-27P	-1.11548	0.60206
RNU6-293P	-1.11548	0.60206
RNU6-339P	-1.11548	0.60206
RNU6-346P	-1.11548	0.60206
RNU6-362P	-1.11548	0.60206
RNU6-37P	-1.11548	0.60206
RNU6-489P	-1.11548	0.60206
RNU6-502P	-1.11548	0.60206
RNU6-524P	-1.11548	0.60206
RNU6-546P	-1.11548	0.60206
RNU6-554P	-1.11548	0.60206
RNU6-556P	-1.11548	0.60206
RNU6-579P	-1.11548	0.60206
RNU6-600P	-1.11548	0.60206
RNU6-653P	-1.11548	0.60206
RNU6-662P	-1.11548	0.60206
RNU6-673P	-1.11548	0.60206
RNU6-682P	-1.11548	0.60206
RNU6-705P	-1.11548	0.60206
RNU6-708P	-1.11548	0.60206
RNU6-70P	-1.11548	0.60206
RNU6-726P	-1.11548	0.60206
RNU6-729P	-1.11548	0.60206
RNU6-763P	-1.11548	0.60206
RNU6-76P	-1.11548	0.60206
RNU6-836P	-1.11548	0.60206
RNU6-841P	-1.11548	0.60206
RNU6-909P	-1.11548	0.60206
RNU6-950P	-1.11548	0.60206
RNU6-973P	-1.11548	0.60206
RNU7-136P	-1.11548	0.60206
RNU7-56P	-1.11548	0.60206
RNU7-59P	-1.11548	0.60206
RNU7-63P	-1.11548	0.60206
RNU7-81P	-1.11548	0.60206
SNORA2	-1.11548	0.60206
SNORA25	-1.11548	0.60206
SNORA25	-1.11548	0.60206
SNORA48	-1.11548	0.60206
SNORA48	-1.11548	0.60206
SNORA51	-1.11548	0.60206
SNORA67	-1.11548	0.60206
SNORA69	-1.11548	0.60206
SNORA70	-1.11548	0.60206
SNORA70	-1.11548	0.60206
SNORA72	-1.11548	0.60206
SNORA8	-1.11548	0.60206
SNORD115-14	-1.11548	0.60206
SNORD116-25	-1.11548	0.60206
SNORD42	-1.11548	0.60206
SNORD75	-1.11548	0.60206
RNA5SP20	-1.11548	1.19028
RNA5SP319	-1.11548	1.19028
RN7SL638P	-1.11548	0.889811
RNU4-88P	-1.11548	0.97847
uc_338	-1.09954	0.642997
RNU6-28P	-1.08489	0.64114
MIR23B	-1.078	1.10304
RNU6-658P	-1.06559	0.665966
MIR497HG	-1.0614	0.764419
snoU13	-1	0.989631
snoU2-30	-1	0.60206
U6	-1	0.757104
Y_RNA	-1	0.757104
Y_RNA	-1	0.830962
Y_RNA	-1	0.834321
Y_RNA	-1	0.989631
Y_RNA	-1	0.989631
Y_RNA	-1	1.00277
MIR1292	-1	0.531435
MIR4505	-1	0.60206
MIR4701	-1	0.60206
MIR4765	-1	0.60206
MIR4796	-1	0.757104
MIR628	-1	0.757104
MIR6746	-1	0.60206
MIR6848	-1	0.608066
MIR6853	-1	0.60206
RN7SL229P	-1	0.757104
RN7SL619P	-1	0.60206
RN7SL653P	-1	0.531435
RNU4-51P	-1	0.60206
RNU6-106P	-1	0.989631
RNU6-1098P	-1	1.34518
RNU6-1111P	-1	0.727771
RNU6-1164P	-1	0.757104
RNU6-1198P	-1	0.757104
RNU6-137P	-1	0.834321
RNU6-177P	-1	0.989631
RNU6-378P	-1	0.60206
RNU6-610P	-1	0.60206
RNU6-88P	-1	0.608429
RNU6-89P	-1	0.60206
RNU6-969P	-1	0.757104
RNU7-180P	-1	0.757104
SNORA62	-1	0.834321
SNORA70D	-1	0.555902
SNORD113	-1	0.60206
SNORD63	-1	0.989631
SNORD64	-0.956931	0.629378
Y_RNA	-0.932886	0.734693
MIR3619	-0.874469	0.764419
RNU6-577P	-0.874469	0.609166
RNU6ATAC39P	-0.874469	1.00277
Y_RNA	-0.862496	0.60206
RN7SKP115	-0.862496	0.591681
RNU6-455P	-0.862496	0.591681
SNORD114-17	-0.862496	0.60206
U47924.1	-0.847997	1.27748
Y_RNA	-0.847997	0.606529
MIR106B	-0.847997	1.27748
RNU6-513P	-0.847997	1.27748
RNU6-82P	-0.847997	0.703477
RNU6-945P	-0.847997	0.546299
SNORA74	-0.847997	0.703477
SNORD74	-0.847997	0.546299
U2AF1L4	-0.840059	0.832347
RN7SL689P	-0.830075	0.567633
U1	-0.807355	0.989631
Y_RNA	-0.807355	0.989631
MIR4668	-0.807355	0.757104
MIR553	-0.807355	0.608429
MIR573	-0.807355	0.531435
MIR6856	-0.807355	0.60206
RN7SL380P	-0.807355	0.60206
RNU6-540P	-0.807355	0.989631
RNU6-795P	-0.807355	0.989631
RNU6-856P	-0.807355	0.757104
SNORD114-4	-0.807355	0.757104
SNORD121A	-0.807355	0.989631
RNA5SP201	-0.80408	0.55156
RNA5SP370	-0.798366	0.533779
U4	-0.798366	0.60206
Y_RNA	-0.798366	0.533779
Y_RNA	-0.798366	0.60206
Y_RNA	-0.798366	0.60206
Y_RNA	-0.798366	0.60206
MIR300	-0.798366	0.533779
MIR3929	-0.798366	0.60206
MIR4694	-0.798366	0.60206
MIR944	-0.798366	0.60206
RN7SKP282	-0.798366	0.60206
RNU4-78P	-0.798366	0.60206
RNU5E-3P	-0.798366	0.60206
RNU6-291P	-0.798366	0.533779
RNU6-703P	-0.798366	0.60206
RNU7-11P	-0.798366	0.533779
SNORA15	-0.798366	0.60206
SNORA63	-0.798366	0.533779
SNORA7	-0.798366	0.533779
MIR22HG	-0.789078	1.1035
MIR3655	-0.788496	0.995875
RNA5SP212	-0.777608	0.800822
MIR6784	-0.777608	1.00277
RN7SL788P	-0.765535	0.60206
RNF43	-0.737625	0.758035
RNA5SP493	-0.736966	0.834321
RNASE4	-0.736966	0.949537
Y_RNA	-0.736966	0.830962
Y_RNA	-0.736966	0.834321
Y_RNA	-0.736966	0.834321
Y_RNA	-0.736966	0.834321
Y_RNA	-0.736966	0.834321
Y_RNA	-0.736966	0.834321
MIR1287	-0.736966	0.505268
MIR186	-0.736966	0.606529
MIR3198-1	-0.736966	0.834321
MIR4768	-0.736966	0.830962
MIR503	-0.736966	0.834321
MIR548C	-0.736966	0.834321
MIR548Z	-0.736966	0.834321
MIR6721	-0.736966	0.834321
MIR6766	-0.736966	0.834321
MIR6870	-0.736966	1.59077
MIR941-1	-0.736966	0.834321
RN7SKP134	-0.736966	0.505268
RN7SKP6	-0.736966	0.834321
RN7SL162P	-0.736966	0.834321
RN7SL265P	-0.736966	0.505268
RNU2-22P	-0.736966	1.59077
RNU6-1081P	-0.736966	0.834321
RNU6-85P	-0.736966	0.834321
RNU7-84P	-0.736966	0.505268
SNORA36	-0.736966	0.608066
SNORA58B	-0.736966	0.834321
SNORA73	-0.736966	0.834321
SNORD116-27	-0.736966	0.834321
U3	-0.730393	0.554543
SNORA69	-0.725825	0.709935
RN7SL509P	-0.716207	0.901391
RN7SL28P	-0.703018	0.501624
Y_RNA	-0.70044	0.609166
RNF146	-0.690127	0.565403
RNVU1-4	-0.678072	0.531435
MIR3122	-0.678072	0.989631
RN7SL864P	-0.678072	0.598739
RNU7-47P	-0.678072	0.598739
SNORD116-1	-0.678072	0.757104
SNHG20	-0.660004	0.982877
MIR1255A	-0.652077	0.546299
RNU2-53P	-0.652077	1.27748
RNU6-20P	-0.652077	0.703477
ACA59	-0.652077	0.546299
RN7SL834P	-0.628031	1.59077
RNA5SP217	-0.621488	0.60206
snoU13	-0.621488	0.60206
uc_338	-0.621488	0.60206
Y_RNA	-0.621488	0.60206
Y_RNA	-0.621488	0.60206
Y_RNA	-0.621488	0.60206
MIR1199	-0.621488	0.60206
MIR1914	-0.621488	0.60206
MIR2276	-0.621488	0.60206
MIR3138	-0.621488	0.60206
MIR3610	-0.621488	0.60206
MIR3653	-0.621488	0.60206
MIR365B	-0.621488	0.60206
MIR3713	-0.621488	0.60206
MIR4261	-0.621488	0.60206
MIR4477A	-0.621488	0.60206
MIR4477B	-0.621488	0.60206
MIR548AU	-0.621488	0.60206
MIR5703	-0.621488	0.60206
MIR5708	-0.621488	0.60206
MIR6504	-0.621488	0.60206
MIR6734	-0.621488	0.60206
MIR6762	-0.621488	0.60206
MIR6763	-0.621488	0.60206
MIR6812	-0.621488	0.60206
MIR6818	-0.621488	0.60206
MIR6847	-0.621488	0.60206
MIR6855	-0.621488	0.60206
MIR7976	-0.621488	0.60206
MIR8087	-0.621488	0.60206
MIR936	-0.621488	0.60206
MIRLET7A3	-0.621488	0.60206
RN7SKP171	-0.621488	0.60206
RN7SKP213	-0.621488	0.60206
RN7SKP229	-0.621488	0.60206
RN7SL176P	-0.621488	0.60206
RN7SL202P	-0.621488	0.60206
RN7SL291P	-0.621488	0.60206
RN7SL387P	-0.621488	0.60206
RN7SL391P	-0.621488	0.60206
RN7SL785P	-0.621488	0.60206
RNU1-83P	-0.621488	0.60206
RNU6-1069P	-0.621488	0.60206
RNU6-1075P	-0.621488	0.60206
RNU6-1235P	-0.621488	0.60206
RNU6-1320P	-0.621488	0.60206
RNU6-29P	-0.621488	0.60206
RNU6-338P	-0.621488	0.60206
RNU6-498P	-0.621488	0.60206
RNU6-599P	-0.621488	0.60206
RNU6-911P	-0.621488	0.60206
RNU7-127P	-0.621488	0.60206
SNORD45	-0.621488	0.60206
SNORD5	-0.621488	0.60206
SNORD74	-0.621488	0.60206
RN7SKP64	-0.616671	0.709262
MIR6807	-0.612977	0.531435
RNU6-130P	-0.610053	1.10304
SNORD116-14	-0.610053	0.572344
U8	-0.606658	0.654433
RNVU1-6	-0.597902	0.560846
pRNA	-0.584963	0.60206
pRNA	-0.584963	0.60206
pRNA	-0.584963	0.60206
pRNA	-0.584963	0.60206
RNA5SP244	-0.584963	0.60206
RNA5SP282	-0.584963	0.800822
snoZ6	-0.584963	0.60206
Y_RNA	-0.584963	0.558473
Y_RNA	-0.584963	0.558473
Y_RNA	-0.584963	0.60206
Y_RNA	-0.584963	0.60206
MIR1273C	-0.584963	0.60206
MIR3149	-0.584963	0.60206
MIR3618	-0.584963	0.60206
MIR382	-0.584963	0.60206
MIR3939	-0.584963	0.598739
MIR3940	-0.584963	0.60206
MIR4440	-0.584963	0.60206
MIR4646	-0.584963	0.60206
MIR4664	-0.584963	1.27748
MIR4669	-0.584963	0.60206
MIR4676	-0.584963	0.60206
MIR4683	-0.584963	0.60206
MIR4720	-0.584963	0.60206
MIR4775	-0.584963	0.60206
MIR496	-0.584963	0.60206
MIR545	-0.584963	0.757104
MIR555	-0.584963	0.60206
MIR6075	-0.584963	0.608066
MIR6506	-0.584963	0.60206
MIR6776	-0.584963	0.60206
MIR6793	-0.584963	0.60206
MIR6795	-0.584963	0.60206
MIR6830	-0.584963	0.60206
MIR6867	-0.584963	0.60206
MIR6873	-0.584963	0.60206
MIR6877	-0.584963	0.60206
MIR6880	-0.584963	0.60206
MIR922	-0.584963	0.60206
MIR92A1	-0.584963	0.60206
RN7SKP113	-0.584963	0.60206
RN7SKP144	-0.584963	0.60206
RN7SKP172	-0.584963	0.558473
RN7SKP249	-0.584963	0.60206
RN7SL190P	-0.584963	0.60206
RN7SL319P	-0.584963	0.60206
RN7SL474P	-0.584963	0.60206
RN7SL510P	-0.584963	0.60206
RN7SL555P	-0.584963	0.519722
RN7SL560P	-0.584963	0.60206
RN7SL624P	-0.584963	0.60206
RN7SL757P	-0.584963	0.60206
RNU2-35P	-0.584963	0.757104
RNU4-59P	-0.584963	0.60206
RNU4-87P	-0.584963	0.60206
RNU6-1169P	-0.584963	0.60206
RNU6-1240P	-0.584963	0.60206
RNU6-155P	-0.584963	0.60206
RNU6-2	-0.584963	0.60206
RNU6-288P	-0.584963	0.60206
RNU6-435P	-0.584963	0.60206
RNU6-469P	-0.584963	0.60206
RNU6-4P	-0.584963	0.60206
RNU6-55P	-0.584963	0.60206
RNU6-680P	-0.584963	0.60206
RNU6-780P	-0.584963	0.608066
RNU7-12P	-0.584963	0.60206
SNORA26	-0.584963	0.60206
SNORA3A	-0.584963	0.60206
SNORA70H	-0.584963	0.60206
SNORD116-6	-0.584963	1.07585
SNORD19B	-0.584963	0.60206
SNORD2	-0.584963	0.60206
SNORD41	-0.584963	0.60206
SNORD49A	-0.584963	0.60206
SNORD49B	-0.584963	0.989631
SNORD66	-0.584963	0.60206
RNVU1-15	-0.567041	0.54869
RN7SL306P	-0.547488	0.562637
RN7SL414P	-0.544321	0.777661
U3	-0.540568	0.676298
MIR181A2	-0.540568	1.00277
RN7SL268P	-0.530515	0.703477
RN7SL378P	-0.530515	0.608066
RNF224	-0.519374	0.608855
RNF121	-0.515759	0.865086
SNORD38C	-0.514573	0.531435
Y_RNA	-0.5025	0.530575
U62317.3	-0.485427	0.608066
MIR32	-0.485427	0.505268
MIR6781	-0.485427	0.505268
RN7SL441P	-0.485427	0.505268
RNU6-100P	-0.485427	0.505268
RNU6-1285P	-0.485427	0.834321
RNU6-62P	-0.485427	0.505268
RNU6ATAC16P	-0.485427	0.834321
SNORA67	-0.485427	0.505268
SNORD114-28	-0.485427	0.834321
U4	-0.485427	0.505268
AC002044.3	-0.476438	0.635829
snoU109	-0.469485	0.676298
RNF4	-0.463562	0.613238
uc_338	-0.459432	1.45317
RN7SL182P	-0.459432	0.60206
RN7SL279P	-0.459432	0.598739
RNU6-652P	-0.459432	0.598739
RNF216P1	-0.458336	0.603702
RNF212	-0.452512	0.570621
MIR138-1	-0.452512	0.512641
RNA5SP179	-0.447459	1.27748
RN7SKP299	-0.447459	0.702254
RNU6-875P	-0.440573	0.764419
RNF144B	-0.428094	0.711327
RNA5SP78	-0.415038	0.757104
Y_RNA	-0.415038	0.513165
Y_RNA	-0.415038	0.531435
Y_RNA	-0.415038	0.60206
Y_RNA	-0.415038	0.60206
Y_RNA	-0.415038	0.60206
Y_RNA	-0.415038	0.60206
Y_RNA	-0.415038	0.60206
Y_RNA	-0.415038	0.608066
MIR1304	-0.415038	0.60206
MIR22	-0.415038	0.60206
MIR28	-0.415038	0.60206
MIR302D	-0.415038	0.60206
MIR30C2	-0.415038	0.60206
MIR3145	-0.415038	0.60206
MIR4427	-0.415038	0.60206
MIR4517	-0.415038	0.60206
MIR4709	-0.415038	0.60206
MIR4782	-0.415038	0.60206
MIR5693	-0.415038	0.60206
MIR640	-0.415038	0.60206
MIR6501	-0.415038	0.60206
MIR6769A	-0.415038	0.60206
MIR6825	-0.415038	0.60206
MIR924	-0.415038	0.60206
RN7SL413P	-0.415038	0.60206
RNU4-21P	-0.415038	0.60206
RNU4-34P	-0.415038	0.60206
RNU6-1019P	-0.415038	0.60206
RNU6-1309P	-0.415038	0.60206
RNU6-199P	-0.415038	0.60206
RNU6-298P	-0.415038	0.60206
RNU6-301P	-0.415038	0.60206
RNU6-677P	-0.415038	0.60206
RNU6-787P	-0.415038	0.60206
RNU7-41P	-0.415038	0.60206
SNORA75	-0.415038	0.60206
SNORD102	-0.415038	0.60206
SNORD111B	-0.415038	0.60206
SNORD45C	-0.415038	0.60206
SNORD96A	-0.415038	0.60206
SNORD96B	-0.415038	0.60206
SNORD101	-0.407175	0.546435
MIR6728	-0.403356	0.537222
SNORA9	-0.395929	0.564614
RNLS	-0.39502	0.758991
RNF170	-0.394697	0.584116
RNASEL	-0.392821	0.672408
RNU7-45P	-0.378512	0.989631
RNF222	-0.369234	1.19028
RNVU1-19	-0.36257	0.505268
snoU13	-0.36257	0.558473
MIR27B	-0.36257	0.5185
MIR3685	-0.36257	0.505268
RNU6-1042P	-0.36257	0.834321
RNU6-431P	-0.36257	0.505268
RNU6-608P	-0.36257	0.505268
RNU6-925P	-0.36257	0.523887
SNORA26	-0.36257	0.505268
SNORA4	-0.36257	0.505268
SNORD62A	-0.36257	0.834321
SNORA75	-0.353637	1.20181
MIR2116	-0.347923	0.989631
RNU6-107P	-0.347923	0.60206
RNU4-80P	-0.343954	0.539766
SNORA30	-0.341037	0.703477
RNA5SP260	-0.321928	0.60206
Y_RNA	-0.321928	0.558473
Y_RNA	-0.321928	0.60206
Y_RNA	-0.321928	0.60206
Y_RNA	-0.321928	0.60206
MIR4306	-0.321928	0.60206
MIR4516	-0.321928	0.60206
MIR5706	-0.321928	0.60206
MIR624	-0.321928	0.60206
MIR661	-0.321928	0.60206
RN7SL731P	-0.321928	0.60206
RNU2-33P	-0.321928	0.60206
RNU2-69P	-0.321928	0.60206
RNU6-1282P	-0.321928	0.60206
RNU6-574P	-0.321928	0.60206
RNU6-824P	-0.321928	0.60206
SNORA76	-0.321928	0.757104
SNORD116-20	-0.321928	0.60206
SNORD23	-0.321928	0.60206
SNORD28	-0.321928	0.60206
RN7SKP217	-0.308122	0.676298
SNORA80E	-0.295456	0.676298
Y_RNA	-0.289507	0.505268
MIR3657	-0.289507	0.505268
RNU6-504P	-0.289507	0.505268
SNORD14C	-0.289507	0.53291
Y_RNA	-0.280108	0.531435
MIR4284	-0.280108	0.531435
MIR193BHG	-0.274973	0.630504
RNA5SP37	-0.263034	0.60206
MIR3682	-0.263034	0.60206
MIR4755	-0.263034	0.60206
MIR5192	-0.263034	0.60206
MIR5582	-0.263034	0.60206
RNU1-77P	-0.263034	0.60206
MIR5010	-0.241008	0.505268
RN7SL199P	-0.241008	0.608066
RN7SL656P	-0.241008	0.608066
SNORA62	-0.241008	0.834321
U3	-0.222392	0.830962
MIR503HG	-0.222392	0.633056
RN7SKP207	-0.222392	0.60206
RN7SL311P	-0.222392	0.60206
RNU6-26P	-0.210218	0.544693
RNF145	-0.206514	0.555402
RNPC3	-0.204199	0.630123
MIR4737	-0.201634	0.757104
RNF31	-0.195367	0.559204
RNF167	-0.194539	0.54229
Y_RNA	-0.192645	0.60206
MIR6819	-0.192645	0.60206
RN7SL417P	-0.169925	0.60206
RRP8	-0.161243	0.617731
MIR454	-0.160465	0.505268
RNU6-1188P	-0.152003	0.558473
SNORA75	-0.152003	0.60206
Y_RNA	-0.137504	0.60206
Y_RNA	-0.137504	0.60206
RNA5SP123	-0.120294	0.834321
SNORA12	-0.0874628	0.60206
RN7SL655P	0.0901978	0.505268
RN7SL87P	0.122857	0.502649
MIR1296	0.137504	0.60206
MIR374B	0.152003	0.513165
RN7SL382P	0.152003	0.60206
SNORA50B	0.152003	0.60206
MIR663A	0.159066	0.681873
RNF7P1	0.16601	0.764419
RNH1	0.169701	0.596574
RNU4ATAC18P	0.169925	0.60206
SNORA31	0.169925	0.60206
MT-TR	0.179266	0.578298
RNA5SP295	0.180572	0.834321
RRP1B	0.18669	0.51167
RRP7A	0.187533	0.524807
SCARNA17	0.190431	0.513974
MIR4435-1	0.192645	0.60206
MIR4435-2	0.192645	0.60206
RNF2	0.194021	0.543997
RNF123	0.198696	0.579514
MIR6797	0.200299	0.528496
RNPEPL1	0.200936	0.669928
RND3	0.203465	0.850786
U2AF1	0.20366	0.557934
RNPS1P1	0.207082	0.705032
RN7SL587P	0.211107	0.502376
RNU6-171P	0.214125	0.652377
RRP9	0.215796	0.563038
U73023.1	0.222392	0.60206
Y_RNA	0.222392	0.531435
Y_RNA	0.222392	0.60206
Y_RNA	0.222392	0.60206
Y_RNA	0.222392	0.60206
MIR1207	0.222392	0.531435
MIR6779	0.222392	0.60206
RN7SKP98	0.222392	0.558473
RN7SL531P	0.222392	0.60206
RN7SL605P	0.222392	0.60206
RN7SL610P	0.222392	0.60206
RNU6-198P	0.222392	0.60206
SNORA2B	0.222392	0.590693
SNORA6	0.222392	0.60206
SNORA7	0.222392	0.60206
SNORD13E	0.222392	0.60206
RN7SKP271	0.229482	1.00277
MT-TH	0.234234	0.562333
MT-TY	0.235813	0.64495
RNU5A-4P	0.241008	0.834321
RN7SKP163	0.243271	0.687855
SNORD22	0.246858	0.555817
RNF138P1	0.249978	0.569727
MT-TA	0.255048	0.972542
RNA5SP297	0.263034	0.60206
Y_RNA	0.263034	0.60206
Y_RNA	0.263034	0.60206
Y_RNA	0.263034	0.60206
MIR3680-1	0.263034	0.60206
MIR4470	0.263034	0.60206
MIR5739	0.263034	0.60206
MIR6811	0.263034	0.60206
RN7SL146P	0.263034	0.757104
RNU2-37P	0.263034	0.60206
RNU6-306P	0.263034	0.60206
RNU6-48P	0.263034	0.60206
SNORA21B	0.263034	0.60206
SNORA27	0.263034	0.60206
SNORD114-2	0.263034	0.60206
SNORD59A	0.263034	1.00277
RRP1	0.266525	0.638557
MIR4435-2HG	0.271913	0.718425
MT-TN	0.272185	0.797289
RN7SKP186	0.275634	0.539999
RN7SL344P	0.280108	0.598739
RN7SL809P	0.285909	0.624637
SNORD19	0.286304	0.612883
USB1	0.286567	1.24309
MT-TG	0.28741	1.0331
Y_RNA	0.289507	0.505268
Y_RNA	0.289507	0.505268
RNU4-24P	0.289507	0.505268
SNORD48	0.289507	0.834321
SNHG6	0.292367	0.606521
SNORA74C-2	0.301656	0.503
SNORD67	0.304855	1.27748
SNORA22B	0.314109	0.60206
RN7SKP79	0.315202	0.532705
MT-TT	0.317301	0.935342
MIR133A1HG	0.320333	0.614758
RNA5SP320	0.321928	0.60206
Y_RNA	0.321928	0.60206
Y_RNA	0.321928	0.60206
MIR103A2	0.321928	0.60206
MIR1276	0.321928	0.60206
MIR4803	0.321928	0.60206
MIR770	0.321928	0.60206
MIR8075	0.321928	0.558473
MIR877	0.321928	0.60206
RN7SKP224	0.321928	0.60206
RN7SKP281	0.321928	0.60206
RNU4-46P	0.321928	0.60206
RNU6-1316P	0.321928	0.60206
SNORA9	0.321928	0.60206
SNORD19B	0.321928	0.60206
Y_RNA	0.337035	0.555342
RNF126	0.339158	0.76565
SNORA63	0.339206	0.595662
RN7SKP16	0.341037	1.27748
RN7SL368P	0.345135	0.510084
Y_RNA	0.347923	0.531435
MIR4258	0.347923	0.757104
MIR544B	0.347923	0.598739
RN7SKP198	0.347923	0.757104
RNU1-91P	0.347923	0.989631
RNU6-583P	0.347923	0.60206
SNORA25	0.347923	0.60206
SNORD116-16	0.347923	0.513165
RNF220	0.348184	0.573768
RNMT	0.351232	1.03184
RNU6-850P	0.353637	0.764419
SNORA72	0.357552	0.730955
SNORA68B	0.358454	0.717209
RNU2-2P	0.361818	0.583934
Y_RNA	0.36257	0.505268
MIR4439	0.36257	0.834321
MIR4479	0.36257	0.505268
RN7SL343P	0.36257	0.505268
RN7SL462P	0.36257	0.505268
RNU11-2P	0.36257	0.834321
RNU6-1322P	0.36257	0.608066
RNU6-343P	0.36257	0.505268
RNU6-826P	0.36257	0.505268
SNORA40	0.36257	0.834321
SNORA58	0.36257	0.505268
SNORD116-24	0.36257	0.834321
SNORA5C	0.364572	0.530881
SNORA18	0.36592	0.562032
MT-TQ	0.372554	0.58906
SNORD118	0.374124	0.539602
RNU6-485P	0.378512	0.757104
SNORD38	0.378512	0.69897
SNORA3B	0.380604	0.585888
MT-TP	0.382154	0.680572
RN7SL481P	0.38529	0.553059
RN7SKP36	0.389042	0.660739
SNORA73A	0.390911	0.548205
RNU6-433P	0.392317	0.519176
MIR600HG	0.402902	0.651317
MT-TI	0.40576	0.582603
MT-TV	0.409876	0.573327
RNU4-82P	0.410763	0.54163
FP700111.2	0.415038	0.60206
SCARNA16	0.415038	1.19028
SCARNA21B	0.415038	0.60206
U8	0.415038	0.60206
uc_338	0.415038	0.60206
Y_RNA	0.415038	0.60206
Y_RNA	0.415038	0.60206
Y_RNA	0.415038	0.60206
Y_RNA	0.415038	0.60206
7SK	0.415038	0.60206
MIR1289-1	0.415038	0.60206
MIR3614	0.415038	0.60206
MIR381HG	0.415038	0.558473
MIR3942	0.415038	0.60206
MIR4710	0.415038	0.60206
MIR5699	0.415038	0.60206
MIR6515	0.415038	0.60206
MIR6852	0.415038	0.60206
MIR765	0.415038	0.558473
MIR7854	0.415038	0.989631
MIR941-5	0.415038	0.60206
RN7SKP184	0.415038	0.60206
RN7SKP25	0.415038	0.830962
RN7SKP65	0.415038	0.60206
RN7SL153P	0.415038	0.608066
RN7SL248P	0.415038	0.60206
RN7SL37P	0.415038	0.764419
RN7SL453P	0.415038	0.60206
RN7SL810P	0.415038	0.60206
RNU4-7P	0.415038	0.60206
RNU4-85P	0.415038	0.60206
RNU4-8P	0.415038	0.60206
RNU6-101P	0.415038	0.60206
RNU6-1208P	0.415038	0.60206
RNU6-1267P	0.415038	0.558473
RNU6-237P	0.415038	0.60206
RNU6-510P	0.415038	0.60206
RNU6-628P	0.415038	0.60206
RNU6-807P	0.415038	0.60206
RNU7-151P	0.415038	0.60206
RNU7-75P	0.415038	0.757104
SNORA74C-1	0.415038	0.800822
SNORD104	0.415038	0.616002
SNORD114-31	0.415038	0.60206
SNORD116-26	0.415038	0.60206
SNORD37	0.415038	0.558473
SNORD38B	0.415038	0.60206
SNORD42A	0.415038	0.60206
SNORD5	0.415038	0.60206
SNORD62B	0.415038	0.60206
RNU1-13P	0.426265	0.63688
MIR3936	0.429684	0.645115
SNORD4A	0.432111	0.594975
MIR663B	0.432959	1.19028
SNORA22C	0.434403	0.588574
Y_RNA	0.436099	0.666156
uc_338	0.438121	0.627069
MIR1206	0.440573	0.609166
RN7SKP23	0.440573	0.986111
SNORD65C	0.440573	0.609166
SNORA21	0.442005	0.624016
snoU2_19	0.4458	0.623629
Y_RNA	0.447459	0.539999
MIR4521	0.447459	1.27748
RN7SKP268	0.447459	0.546299
RNU6-367P	0.447459	0.703477
SNORD114-10	0.447459	0.539999
Y_RNA	0.459432	0.60206
MIR3167	0.459432	0.757104
RNU6-1016P	0.459432	0.687855
RNU6-1190P	0.459432	0.531435
RNU6-942P	0.462972	0.761549
SNORD27	0.465664	0.755132
SNORA16A	0.469485	0.764419
SNORA44	0.469485	0.713467
SNORD10	0.471769	0.582434
SNORA22	0.473931	0.60558
RNF182	0.475338	0.589578
RMRP	0.476438	0.612883
RNA5SP221	0.485427	0.834321
Y_RNA	0.485427	0.505268
MIR4484	0.485427	0.834321
MIR4513	0.485427	0.834321
MIR548N	0.485427	0.834321
MIR548U	0.485427	0.834321
MIR5581	0.485427	0.834321
RN7SKP133	0.485427	0.60206
RN7SKP45	0.485427	0.505268
RN7SKP95	0.485427	0.504946
RN7SL402P	0.485427	0.505268
RN7SL498P	0.485427	0.564614
RN7SL683P	0.485427	0.834321
RN7SL708P	0.485427	0.505268
RN7SL833P	0.485427	0.60206
RNU6-212P	0.485427	2.0128
RNU6-344P	0.485427	0.505268
RNU6-444P	0.485427	0.505268
RNU6-90P	0.485427	0.505268
RNU7-50P	0.485427	0.834321
SNORA1B	0.485427	0.834321
SCARNA22	0.489204	0.523851
RN7SKP90	0.490986	0.636047
SCARNA1	0.491853	0.556602
RND1	0.491925	0.77914
RNU1-11P	0.495527	0.804069
SNORA72	0.495957	0.629378
Y_RNA	0.4975	0.798823
RN7SL255P	0.5025	1.20181
U47924.2	0.514573	0.530575
SCARNA24	0.514573	0.989631
Y_RNA	0.514573	0.598739
Y_RNA	0.514573	0.60206
MIR579	0.514573	0.757104
RN7SKP211	0.514573	0.757104
RNU6-597P	0.514573	0.989631
SNORA40	0.514573	1.33861
SNHG15	0.515852	1.53652
MIR663AHG	0.517269	0.897699
RNU1-67P	0.520123	0.720493
SNORA75	0.520832	0.605202
SNORA57	0.521799	0.633727
Y_RNA	0.523562	0.659506
SNORD33	0.523562	0.725411
U1	0.530515	0.546299
MIR3680-2	0.530515	1.27748
MIR4714	0.530515	0.702254
RNU6-1141P	0.530515	0.703477
RN7SL494P	0.537657	0.526132
RN7SKP50	0.540568	0.585011
SNORD116-7	0.540568	0.667944
RN7SL285P	0.544321	0.541039
SNORA14B	0.544996	0.861492
SNORA64	0.546103	0.625906
Y_RNA	0.547488	0.660471
RN7SL192P	0.547488	0.660471
RN7SL629P	0.547488	0.865521
RNU1-88P	0.547488	0.666156
SNORD111	0.547488	0.865521
SNORA17B	0.549806	0.626266
RN7SKP269	0.552541	0.512641
RNU6-195P	0.552541	0.97847
MIR3687-1	0.556393	0.56407
RN7SL258P	0.556393	0.638958
SNORA16B	0.559427	0.637678
SNORA38B	0.561879	0.726374
SNORA71C	0.561879	1.10802
MIR3687-2	0.564264	0.56407
SNORD4B	0.567041	0.724467
RN7SL740P	0.568284	0.556755
MIR4697HG	0.572579	0.904157
SNORA79B	0.575207	0.728448
RNA5SP491	0.584963	0.60206
U8	0.584963	0.60206
uc_338	0.584963	0.60206
uc_338	0.584963	0.757104
Y_RNA	0.584963	0.558473
Y_RNA	0.584963	0.558473
Y_RNA	0.584963	0.558473
Y_RNA	0.584963	0.558473
Y_RNA	0.584963	0.558473
Y_RNA	0.584963	0.558473
Y_RNA	0.584963	0.60206
Y_RNA	0.584963	0.60206
Y_RNA	0.584963	0.60206
Y_RNA	0.584963	0.60206
Y_RNA	0.584963	0.60206
Y_RNA	0.584963	0.757104
Y_RNA	0.584963	0.989631
MIR1306	0.584963	0.60206
MIR1322	0.584963	0.60206
MIR196A1	0.584963	0.60206
MIR24-1	0.584963	0.60206
MIR2682	0.584963	0.60206
MIR29A	0.584963	0.60206
MIR329-2	0.584963	0.60206
MIR3975	0.584963	0.60206
MIR4296	0.584963	0.989631
MIR4315-1	0.584963	0.60206
MIR4324	0.584963	0.60206
MIR4419A	0.584963	0.60206
MIR4469	0.584963	0.60206
MIR4480	0.584963	0.60206
MIR4647	0.584963	0.60206
MIR4673	0.584963	0.60206
MIR4691	0.584963	0.60206
MIR4712	0.584963	0.60206
MIR4748	0.584963	0.60206
MIR4749	0.584963	0.60206
MIR4762	0.584963	0.558473
MIR5009	0.584963	0.757104
MIR5047	0.584963	0.60206
MIR5187	0.584963	0.60206
MIR5195	0.584963	0.60206
MIR548AC	0.584963	0.60206
MIR5692A1	0.584963	0.60206
MIR571	0.584963	0.60206
MIR654	0.584963	0.60206
MIR6737	0.584963	0.60206
MIR6738	0.584963	0.60206
MIR6750	0.584963	0.60206
MIR6859-4	0.584963	0.558473
MIR6862-1	0.584963	0.60206
MIR6862-2	0.584963	0.60206
MIR6882	0.584963	0.60206
MIR6885	0.584963	0.60206
MIR7107	0.584963	0.60206
MIR7856	0.584963	0.60206
MIR943	0.584963	0.60206
MIR98	0.584963	0.60206
RN7SKP22	0.584963	0.558473
RN7SKP246	0.584963	0.60206
RN7SKP38	0.584963	0.667944
RN7SKP63	0.584963	0.60206
RN7SKP72	0.584963	0.834321
RN7SKP76	0.584963	0.60206
RN7SKP78	0.584963	1.27748
RN7SL32P	0.584963	0.60206
RN7SL442P	0.584963	0.800822
RN7SL520P	0.584963	0.60206
RN7SL775P	0.584963	1.06324
RN7SL840P	0.584963	0.60206
RN7SL862P	0.584963	0.757104
RNU1-125P	0.584963	0.60206
RNU1-14P	0.584963	0.60206
RNU2-7P	0.584963	0.558473
RNU4-32P	0.584963	0.60206
RNU4-52P	0.584963	0.60206
RNU6-10P	0.584963	0.531435
RNU6-126P	0.584963	0.830962
RNU6-39P	0.584963	0.60206
RNU6-766P	0.584963	0.60206
RNU6-8	0.584963	0.558473
RNU6-914P	0.584963	0.60206
RNU6ATAC34P	0.584963	0.60206
RNU7-113P	0.584963	0.60206
RNU7-20P	0.584963	0.60206
SNORA26	0.584963	0.827426
SNORA64	0.584963	0.60206
SNORD108	0.584963	0.60206
SNORD113-1	0.584963	0.598739
SNORD3E	0.584963	0.725411
SNORD45B	0.584963	0.60206
SNORD63B	0.584963	1.18346
RN7SL464P	0.591037	0.587054
SNORD15B	0.60003	0.816748
SNORD58C	0.600393	0.820239
SNORA31	0.602665	0.635332
RNF13	0.60374	0.732117
RN7SL127P	0.607683	0.54276
RNF39	0.612977	0.577831
SNORD46	0.614109	0.698647
U4	0.616671	0.995875
SNORA24	0.61891	0.679983
snoU18	0.621488	0.60206
uc_338	0.621488	0.60206
Y_RNA	0.621488	0.60206
Y_RNA	0.621488	0.60206
Y_RNA	0.621488	0.60206
Y_RNA	0.621488	0.60206
Y_RNA	0.621488	0.60206
Y_RNA	0.621488	0.60206
Y_RNA	0.621488	0.60206
Y_RNA	0.621488	0.60206
Y_RNA	0.621488	0.60206
Y_RNA	0.621488	0.60206
MIR155	0.621488	0.60206
MIR192	0.621488	0.60206
MIR194-2	0.621488	0.60206
MIR20A	0.621488	0.60206
MIR26B	0.621488	0.60206
MIR29C	0.621488	0.60206
MIR30B	0.621488	0.60206
MIR323B	0.621488	0.60206
MIR3934	0.621488	0.60206
MIR4282	0.621488	0.60206
MIR4458	0.621488	0.60206
MIR455	0.621488	0.60206
MIR4639	0.621488	0.60206
MIR4651	0.621488	0.60206
MIR4688	0.621488	0.60206
MIR548AK	0.621488	0.60206
MIR6510	0.621488	0.60206
MIR6511B2	0.621488	0.60206
MIR668	0.621488	0.60206
MIR6735	0.621488	0.60206
MIR6771	0.621488	0.60206
MIR7106	0.621488	0.60206
MIR7855	0.621488	0.60206
RN7SKP139	0.621488	0.60206
RN7SKP208	0.621488	0.60206
RN7SKP75	0.621488	0.60206
RN7SL424P	0.621488	0.60206
RN7SL495P	0.621488	0.60206
RNU1-29P	0.621488	0.60206
RNU4-63P	0.621488	0.60206
RNU6-1224P	0.621488	0.60206
RNU6-1319P	0.621488	0.60206
RNU6-233P	0.621488	0.60206
RNU6-761P	0.621488	0.60206
RNU7-115P	0.621488	0.60206
RNU7-134P	0.621488	0.60206
RNU7-160P	0.621488	0.60206
RNU7-193P	0.621488	0.60206
RNU7-48P	0.621488	0.60206
SNORD114-18	0.621488	0.60206
SNORD114-22	0.621488	0.60206
Y_RNA	0.621488	0.512641
RNU1-103P	0.621488	0.889811
SNORA80D	0.621488	0.711716
SNORD98	0.621488	0.70658
SNORA48	0.622437	0.93398
SNORD94	0.62293	0.684238
RN7SL284P	0.624491	0.782931
SNORA50A	0.626185	0.761349
RN7SL627P	0.628031	0.549608
RN7SL733P	0.628031	0.660471
SNORA8	0.634819	0.716146
Y_RNA	0.63743	0.800822
MIR221	0.63743	0.609166
RN7SL236P	0.63743	0.555342
RN7SL330P	0.63743	0.764419
RN7SL664P	0.63743	0.640538
RN7SL762P	0.63743	0.609166
SNORA40	0.63743	0.857039
SNORD53	0.63743	0.668013
RN7SL518P	0.643856	0.513507
RNVU1-1	0.647698	0.811849
Y_RNA	0.652077	0.703477
Y_RNA	0.652077	1.27748
MIR3677	0.652077	0.546299
MIR4766	0.652077	0.539999
RN7SKP236	0.652077	0.703477
RN7SL363P	0.652077	0.546299
RNU6-1043P	0.652077	1.27748
RNU6-541P	0.652077	0.539999
RNU6ATAC24P	0.652077	0.703477
SNORA47	0.652077	2.1673
RN7SL8P	0.652778	0.587675
MIR3648-1	0.654328	2.07632
MIR3648-2	0.654328	2.07632
SNORA50C	0.66335	0.753391
SNORA80B	0.665999	0.610808
RNASEK	0.666874	2.5611
RNF44	0.672195	0.70022
MIR3605	0.678072	0.531435
MIR593	0.678072	0.757104
MIR933	0.678072	0.531435
RN7SKP178	0.678072	0.598739
RN7SKP67	0.678072	0.989631
RN7SL68P	0.678072	0.757104
RNU6-509P	0.678072	0.598739
RNU6-74P	0.678072	0.989631
SNORA30B	0.678072	0.989631
SNORA70	0.678072	0.727771
RN7SL81P	0.68226	0.546916
SNORA40B	0.690672	0.948207
MIR6753	0.693897	1.11526
RN7SL625P	0.695145	0.663039
SNORA71A	0.69871	1.02999
SCARNA16	0.70044	0.60206
Y_RNA	0.70044	0.800822
MIR6851	0.70044	0.609166
RNU2-63P	0.70044	0.609166
RNU6-571P	0.70044	0.764419
SNORA46	0.706269	0.757945
SNORA70	0.710199	0.708439
RN7SL789P	0.710493	0.725411
RN7SL14P	0.712718	0.540135
SNORA27	0.713119	0.967515
RN7SL801P	0.716207	0.82888
SNORA70	0.718068	0.684002
RN7SL141P	0.721284	0.652483
SNORA67	0.721832	0.845734
RNF144A	0.722353	0.602411
MIR25	0.722466	0.68214
SNORD58A	0.722466	0.522312
RNU4-2	0.734015	0.862971
RNVU1-7	0.736183	0.974401
RNA5SP290	0.736966	0.834321
RNA5SP490	0.736966	0.830962
snoZ196	0.736966	0.633587
U4	0.736966	0.834321
U4atac	0.736966	0.608066
Y_RNA	0.736966	0.830962
Y_RNA	0.736966	0.834321
Y_RNA	0.736966	0.834321
Y_RNA	0.736966	0.834321
5S_rRNA	0.736966	0.608066
MIR1227	0.736966	0.834321
MIR1229	0.736966	0.834321
MIR1249	0.736966	0.834321
MIR1307	0.736966	0.505268
MIR135A1	0.736966	0.834321
MIR320A	0.736966	0.834321
MIR4761	0.736966	0.834321
MIR4793	0.736966	0.834321
MIR5690	0.736966	0.834321
MIR6730	0.736966	0.505268
MIR6796	0.736966	0.834321
RN7SKP120	0.736966	0.834321
RN7SKP166	0.736966	0.830962
RN7SKP170	0.736966	0.834321
RN7SL254P	0.736966	0.834321
RN7SL426P	0.736966	1.59077
RN7SL505P	0.736966	0.59505
RN7SL525P	0.736966	0.834321
RN7SL607P	0.736966	0.834321
RN7SL850P	0.736966	0.505268
RNU4ATAC12P	0.736966	0.834321
RNU6-1177P	0.736966	0.834321
RNU6-1275P	0.736966	0.834321
RNU6-12P	0.736966	0.834321
RNU6-314P	0.736966	0.830962
RNU6-387P	0.736966	0.666156
RNU6-80P	0.736966	0.834321
RNU6-877P	0.736966	0.834321
RNU6-881P	0.736966	0.834321
SNORA9	0.736966	0.834321
SNORD112	0.736966	0.834321
SNORD121B	0.736966	0.834321
MT-TS1	0.737896	0.508399
SNHG25	0.741807	0.731032
RNU1-1	0.74306	0.981704
SNORA49	0.744161	0.686486
RNU1-3	0.744207	0.982608
RNU1-4	0.744207	0.982608
RNU1-27P	0.744285	0.979106
RNU1-28P	0.744285	0.979106
RNU1-2	0.744383	0.982871
RNVU1-18	0.744651	0.983077
U1	0.745174	0.983097
SNORA66	0.752072	0.649623
SCARNA23	0.758992	1.0519
Y_RNA	0.765535	1.19028
RNU6-1262P	0.765535	0.889811
SNORA71B	0.771181	1.26067
U6	0.777608	0.764419
Y_RNA	0.777608	0.676298
MIR644A	0.777608	0.676298
RN7SKP250	0.777608	1.20181
RNU4-1	0.7809	0.844809
SNORD114-1	0.788496	0.553343
RN7SL564P	0.789433	0.550411
RN7SL792P	0.795642	0.559311
RNA5SP494	0.798366	0.533779
SCARNA11	0.798366	0.533779
U6	0.798366	0.60206
Y_RNA	0.798366	0.60206
MIR19B1	0.798366	0.60206
MIR4644	0.798366	0.533779
MIR4802	0.798366	0.60206
MIR634	0.798366	0.533779
RN7SL39P	0.798366	0.533779
RN7SL754P	0.798366	0.60206
RN7SL784P	0.798366	0.60206
RNU6-172P	0.798366	0.533779
RNU6-247P	0.798366	0.60206
RNU6-697P	0.798366	0.533779
RNU6-724P	0.798366	0.60206
RNU6-876P	0.798366	0.60206
RNU6-988P	0.798366	0.533779
SNORA48	0.798366	0.60206
SNHG16	0.799557	0.575192
Y_RNA	0.80408	0.55156
RN7SL346P	0.80408	0.523247
RNA5SP305	0.807355	0.757104
RNF125	0.807355	1.07585
Y_RNA	0.807355	0.60206
Y_RNA	0.807355	0.989631
MIR572	0.807355	0.989631
MIRLET7A2	0.807355	0.757104
RN7SL262P	0.807355	0.51137
RN7SL483P	0.807355	0.54869
RNU6-1143P	0.807355	1.07585
RNU6-151P	0.807355	0.60206
RNU6-331P	0.807355	0.60206
RNU6ATAC27P	0.807355	0.757104
RNU6V	0.807355	0.989631
RNU7-18P	0.807355	0.989631
SNORA57	0.807355	0.598739
SNORD87	0.807355	0.567011
SNORA77B	0.814444	1.75045
SNORA7A	0.815575	0.70211
RN7SL504P	0.817136	0.581724
MIR4458HG	0.819428	0.643453
RN7SL712P	0.819428	0.538435
MIR1291	0.821663	0.526414
Y_RNA	0.823122	0.845217
Y_RNA	0.830075	0.650195
MIR589	0.830075	1.19028
RN7SL242P	0.830075	0.825077
RNU6-216P	0.830075	0.889811
RNU6-767P	0.83289	0.95838
RNU2-61P	0.836501	0.747645
RNF180	0.838249	0.665367
SNORA9B	0.841302	0.74432
RNA5SP304	0.847997	1.27748
RNF152	0.847997	0.539999
U8	0.847997	0.703477
MIR219A2	0.847997	0.505268
MIR4316	0.847997	0.546299
RN7SKP219	0.847997	0.703477
RN7SL405P	0.847997	1.27748
RN7SL720P	0.847997	0.546299
RN7SL760P	0.847997	0.7949
RN7SL78P	0.847997	0.546299
RNU6-1154P	0.847997	1.27748
RNU6-593P	0.847997	0.703477
SNORD124	0.847997	0.703477
RN7SL304P	0.853779	0.559025
RN7SL769P	0.862496	0.521218
Y_RNA	0.862496	0.591681
MIR3978	0.862496	0.60206
RN7SL313P	0.862496	0.591681
RNU6-701P	0.862496	0.60206
RNU6-987P	0.862496	0.60206
RN7SL415P	0.866733	0.75603
Y_RNA	0.869939	0.924113
SNORA71D	0.87317	0.810414
RN7SKP86	0.874469	0.800822
RN7SL416P	0.874469	1.00277
RN7SL449P	0.874469	1.20181
RN7SL645P	0.874469	1.00277
RNU4-31P	0.874469	0.60206
RN7SL478P	0.881355	0.668431
SNORA40	0.881355	1.04243
U3	0.884523	0.583411
Y_RNA	0.884523	0.760984
RN7SL813P	0.884523	0.701582
Y_RNA	0.886343	1.27748
U1	0.886789	0.792917
U3	0.893085	0.660471
Y_RNA	0.893085	0.549608
Y_RNA	0.893085	0.666156
Y_RNA	0.893085	0.865521
RN7SL432P	0.893085	0.666156
RNU6-1305P	0.893085	0.865521
RNU6-681P	0.893085	0.660471
RN7SL215P	0.895663	0.60206
RNU6-1156P	0.895663	0.60206
RN7SL322P	0.89812	0.631984
SNORA68	0.898717	0.902808
SNORA10B	0.90182	0.90842
RN7SL585P	0.906891	0.631409
RN7SL623P	0.906891	1.19028
SNORA24B	0.906891	0.816199
SNORA31	0.906891	1.34518
RN7SL310P	0.917538	0.553343
RNU6-91P	0.917538	0.642997
Y_RNA	0.925999	1.13057
U1	0.932039	1.22561
Y_RNA	0.932886	0.845217
Y_RNA	0.932886	0.845217
RN7SL75P	0.932886	0.726374
Y_RNA	0.938599	0.988326
RNU6-1327P	0.943416	0.919446
RN7SL791P	0.949374	0.579593
SNORA2A	0.954196	0.927584
SNORA84	0.981853	0.761432
SNORA52	0.987061	1.02498
RNF225	1	1.07585
U3	1	0.650195
U3	1	0.989631
Y_RNA	1	0.60206
Y_RNA	1	0.830962
Y_RNA	1	0.989631
Y_RNA	1	1.00277
Y_RNA	1	1.10304
MIR1256	1	0.531435
MIR3176	1	0.989631
MIR4257	1	0.60206
MIR4269	1	0.757104
MIR4659B	1	0.60206
MIR4677	1	0.989631
MIR4685	1	0.989631
MIR4754	1	0.531435
MIR5001	1	1.45317
MIR6759	1	0.60206
MIR6801	1	0.757104
MIR6802	1	0.830962
MIR6821	1	0.989631
MIR6835	1	0.800822
MIR711	1	1.27748
RN7SKP160	1	0.97847
RN7SKP243	1	1.20181
RN7SKP87	1	0.60206
RN7SL299P	1	0.60206
RN7SL307P	1	0.757104
RN7SL320P	1	0.676298
RN7SL327P	1	0.830962
RN7SL408P	1	1.19028
RN7SL429P	1	0.830962
RN7SL489P	1	0.830962
RN7SL616P	1	0.56444
RN7SL690P	1	0.60206
RNU2-31P	1	1.19028
RNU2-36P	1	1.47466
RNU6-1165P	1	0.60206
RNU6-1216P	1	0.531435
RNU6-1280P	1	1.27748
RNU6-319P	1	0.757104
RNU6-32P	1	0.504687
RNU6-432P	1	0.830962
RNU6-580P	1	0.757104
RNU6-674P	1	0.830962
RNU6-817P	1	0.676298
RNU6-866P	1	0.676298
RNU6ATAC2P	1	0.834321
RNU7-169P	1	0.60206
SNORA11B	1	0.834321
SNORA38	1	1.00101
SNORA7	1	0.757104
SNORA7	1	0.834321
SNORA71E	1	0.60206
SNORD113	1	0.989631
SNORD3H	1	0.60206
U1	1.00791	0.970086
SNORA20	1.02748	1.71751
SNORA55	1.03242	0.888841
RN7SL364P	1.04182	0.564614
RN7SL455P	1.05889	0.85621
RN7SL271P	1.06559	0.502397
RN7SL397P	1.08092	0.57142
Y_RNA	1.08489	0.715685
Y_RNA	1.08489	0.715685
RNU4-5P	1.08489	0.715685
RNU6-1297P	1.08489	0.715685
RNU6-213P	1.08746	0.989631
RNU6-531P	1.08746	0.605792
SNORA80A	1.09311	0.982878
RNU6-1283P	1.09954	1.82598
RNU6-711P	1.09954	1.82598
Y_RNA	1.11548	1.19028
pRNA	1.11548	0.60206
RNA5SP132	1.11548	0.60206
RNA5SP231	1.11548	0.60206
RNA5SP237	1.11548	0.60206
RNA5SP273	1.11548	0.60206
RNA5SP281	1.11548	0.60206
RNA5SP340	1.11548	0.60206
RNA5SP417	1.11548	0.60206
RNA5SP449	1.11548	0.60206
RNA5SP475	1.11548	0.60206
RNA5SP67	1.11548	0.60206
RNA5SP91	1.11548	0.60206
RNA5SP99	1.11548	0.60206
RNF19BPX	1.11548	0.60206
SCARNA16	1.11548	0.60206
SCARNA16	1.11548	0.60206
snoU13	1.11548	0.60206
snoU13	1.11548	0.60206
snoU13	1.11548	0.60206
snoU13	1.11548	0.60206
U2	1.11548	0.60206
U2	1.11548	0.60206
U3	1.11548	0.60206
U3	1.11548	0.60206
U3	1.11548	0.60206
U6	1.11548	0.60206
U6	1.11548	0.60206
U6	1.11548	0.60206
U7	1.11548	0.60206
uc_338	1.11548	0.60206
Y_RNA	1.11548	0.60206
Y_RNA	1.11548	0.60206
Y_RNA	1.11548	0.60206
Y_RNA	1.11548	0.60206
Y_RNA	1.11548	0.60206
Y_RNA	1.11548	0.60206
Y_RNA	1.11548	0.60206
Y_RNA	1.11548	0.60206
Y_RNA	1.11548	0.60206
Y_RNA	1.11548	0.60206
Y_RNA	1.11548	0.60206
Y_RNA	1.11548	0.60206
Y_RNA	1.11548	0.60206
Y_RNA	1.11548	0.60206
Y_RNA	1.11548	0.60206
Y_RNA	1.11548	0.60206
Y_RNA	1.11548	0.60206
Y_RNA	1.11548	0.60206
Y_RNA	1.11548	0.60206
Y_RNA	1.11548	0.60206
Y_RNA	1.11548	0.60206
Y_RNA	1.11548	0.60206
Y_RNA	1.11548	0.60206
5S_rRNA	1.11548	0.60206
hsa-mir-548d-2	1.11548	0.60206
MIR1200	1.11548	0.60206
MIR1247	1.11548	0.60206
MIR125A	1.11548	0.60206
MIR125B2	1.11548	0.60206
MIR1268B	1.11548	0.60206
MIR1273G	1.11548	0.60206
MIR128-2	1.11548	0.60206
MIR1302-2HG	1.11548	0.60206
MIR150	1.11548	0.60206
MIR16-1	1.11548	0.60206
MIR181B1	1.11548	0.60206
MIR181D	1.11548	0.60206
MIR1976	1.11548	0.60206
MIR199A1	1.11548	0.60206
MIR199A2	1.11548	0.60206
MIR200A	1.11548	0.60206
MIR2117HG	1.11548	0.60206
MIR3132	1.11548	0.60206
MIR3160-1	1.11548	0.60206
MIR3160-2	1.11548	0.60206
MIR346	1.11548	0.60206
MIR3689C	1.11548	0.60206
MIR369	1.11548	0.60206
MIR3692	1.11548	0.60206
MIR371B	1.11548	0.60206
MIR378G	1.11548	0.60206
MIR381	1.11548	0.60206
MIR3912	1.11548	0.60206
MIR3926-2	1.11548	0.60206
MIR4253	1.11548	0.60206
MIR4276	1.11548	0.60206
MIR429	1.11548	0.60206
MIR4421	1.11548	0.60206
MIR4423	1.11548	0.60206
MIR4436A	1.11548	0.60206
MIR4446	1.11548	0.60206
MIR4463	1.11548	0.60206
MIR4478	1.11548	0.60206
MIR4487	1.11548	0.60206
MIR4499	1.11548	0.60206
MIR4633	1.11548	0.60206
MIR4638	1.11548	0.60206
MIR4641	1.11548	0.60206
MIR4662B	1.11548	0.60206
MIR4663	1.11548	0.60206
MIR4666A	1.11548	0.60206
MIR4678	1.11548	0.60206
MIR4713HG	1.11548	0.60206
MIR4718	1.11548	0.60206
MIR4724	1.11548	0.60206
MIR4729	1.11548	0.60206
MIR4732	1.11548	0.60206
MIR4733	1.11548	0.60206
MIR4743	1.11548	0.60206
MIR4744	1.11548	0.60206
MIR4769	1.11548	0.60206
MIR4794	1.11548	0.60206
MIR4797	1.11548	0.60206
MIR5000	1.11548	0.60206
MIR514A1	1.11548	0.60206
MIR514A2	1.11548	0.60206
MIR514A3	1.11548	0.60206
MIR548AW	1.11548	0.60206
MIR548D2	1.11548	0.60206
MIR548I2	1.11548	0.60206
MIR548J	1.11548	0.60206
MIR548XHG	1.11548	0.60206
MIR549A	1.11548	0.60206
MIR551A	1.11548	0.60206
MIR5585	1.11548	0.60206
MIR5702	1.11548	0.60206
MIR6090	1.11548	0.60206
MIR629	1.11548	0.60206
MIR6788	1.11548	0.60206
MIR6822	1.11548	0.60206
MIR7150	1.11548	0.60206
MIR7974	1.11548	0.60206
MIR8082	1.11548	0.60206
MIR99A	1.11548	0.60206
RN7SKP107	1.11548	0.60206
RN7SKP127	1.11548	0.60206
RN7SKP145	1.11548	0.60206
RN7SKP168	1.11548	0.60206
RN7SKP20	1.11548	0.60206
RN7SKP251	1.11548	0.60206
RN7SKP262	1.11548	0.60206
RN7SKP28	1.11548	0.60206
RN7SKP77	1.11548	0.60206
RN7SKP81	1.11548	0.60206
RN7SL134P	1.11548	0.60206
RN7SL193P	1.11548	0.60206
RN7SL203P	1.11548	0.60206
RN7SL216P	1.11548	0.60206
RN7SL282P	1.11548	0.60206
RN7SL341P	1.11548	0.60206
RN7SL384P	1.11548	0.60206
RN7SL602P	1.11548	0.60206
RN7SL667P	1.11548	0.60206
RN7SL703P	1.11548	0.60206
RN7SL761P	1.11548	0.60206
RN7SL808P	1.11548	0.60206
RN7SL842P	1.11548	0.60206
RNU1-117P	1.11548	0.60206
RNU11-6P	1.11548	0.60206
RNU1-17P	1.11548	0.60206
RNU1-40P	1.11548	0.60206
RNU1-6P	1.11548	0.60206
RNU1-92P	1.11548	0.60206
RNU1-97P	1.11548	0.60206
RNU1-98P	1.11548	0.60206
RNU2-16P	1.11548	0.60206
RNU2-17P	1.11548	0.60206
RNU2-26P	1.11548	0.60206
RNU2-57P	1.11548	0.60206
RNU4-28P	1.11548	0.60206
RNU4-58P	1.11548	0.60206
RNU4-61P	1.11548	0.60206
RNU4ATAC14P	1.11548	0.60206
RNU5A-5P	1.11548	0.60206
RNU6-1009P	1.11548	0.60206
RNU6-1035P	1.11548	0.60206
RNU6-1052P	1.11548	0.60206
RNU6-1076P	1.11548	0.60206
RNU6-1100P	1.11548	0.60206
RNU6-1118P	1.11548	0.60206
RNU6-112P	1.11548	0.60206
RNU6-1145P	1.11548	0.60206
RNU6-116P	1.11548	0.60206
RNU6-1172P	1.11548	0.60206
RNU6-1191P	1.11548	0.60206
RNU6-1248P	1.11548	0.60206
RNU6-1249P	1.11548	0.60206
RNU6-1304P	1.11548	0.60206
RNU6-1313P	1.11548	0.60206
RNU6-1314P	1.11548	0.60206
RNU6-140P	1.11548	0.60206
RNU6-173P	1.11548	0.60206
RNU6-174P	1.11548	0.60206
RNU6-21P	1.11548	0.60206
RNU6-222P	1.11548	0.60206
RNU6-245P	1.11548	0.60206
RNU6-327P	1.11548	0.60206
RNU6-329P	1.11548	0.60206
RNU6-355P	1.11548	0.60206
RNU6-35P	1.11548	0.60206
RNU6-38P	1.11548	0.60206
RNU6-416P	1.11548	0.60206
RNU6-447P	1.11548	0.60206
RNU6-481P	1.11548	0.60206
RNU6-53P	1.11548	0.60206
RNU6-553P	1.11548	0.60206
RNU6-592P	1.11548	0.60206
RNU6-605P	1.11548	0.60206
RNU6-621P	1.11548	0.60206
RNU6-633P	1.11548	0.60206
RNU6-73P	1.11548	0.60206
RNU6-770P	1.11548	0.60206
RNU6-785P	1.11548	0.60206
RNU6-791P	1.11548	0.60206
RNU6-831P	1.11548	0.60206
RNU6-851P	1.11548	0.60206
RNU6-923P	1.11548	0.60206
RNU6-927P	1.11548	0.60206
RNU6-928P	1.11548	0.60206
RNU6-940P	1.11548	0.60206
RNU6-952P	1.11548	0.60206
RNU6-960P	1.11548	0.60206
RNU6-98P	1.11548	0.60206
RNU6ATAC28P	1.11548	0.60206
RNU6ATAC4P	1.11548	0.60206
RNU6ATAC6P	1.11548	0.60206
RNU7-141P	1.11548	0.60206
RNU7-23P	1.11548	0.60206
RNU7-43P	1.11548	0.60206
SNORA3	1.11548	0.60206
SNORA40	1.11548	0.60206
SNORA44	1.11548	0.60206
SNORA48	1.11548	0.60206
SNORA63	1.11548	0.60206
SNORA64	1.11548	0.60206
SNORA67	1.11548	0.60206
SNORA70	1.11548	0.60206
SNORA70	1.11548	0.60206
SNORA70	1.11548	0.60206
SNORA70J	1.11548	0.60206
SNORA73	1.11548	0.60206
SNORA9	1.11548	0.60206
SNORD113-7	1.11548	0.60206
SNORD114-25	1.11548	0.60206
SNORD114-27	1.11548	0.60206
SNORD114-5	1.11548	0.60206
SNORD116-10	1.11548	0.60206
SNORD39	1.11548	0.60206
SNORD56	1.11548	0.60206
SNORD63	1.11548	0.60206
U73479.1	1.12029	0.782138
RNA5SP219	1.12029	0.782138
Y_RNA	1.12029	0.573778
Y_RNA	1.12029	0.782138
Y_RNA	1.12029	0.782138
MIR302A	1.12029	0.782138
MIR376B	1.12029	0.782138
MIR562	1.12029	0.573778
MIR6129	1.12029	0.782138
RN7SKP179	1.12029	0.782138
RNU5A-3P	1.12029	0.782138
RNU6-1284P	1.12029	0.573778
RNU6-196P	1.12029	0.782138
RNU6-272P	1.12029	0.782138
RNU6-310P	1.12029	0.573778
RNU6-667P	1.12029	0.782138
RNU6-722P	1.12029	0.782138
RNU7-80P	1.12029	0.573778
SNORA8	1.12029	0.782138
SNORD3G	1.12029	0.782138
SNORD75	1.12029	0.573778
SCARNA11	1.1375	1.59077
Y_RNA	1.1375	0.562637
Y_RNA	1.1375	0.865521
RN7SKP296	1.1375	0.865521
RN7SL184P	1.1375	0.505268
RN7SL459P	1.1375	0.834321
SNORA63	1.1375	0.865521
SNORA63D	1.1375	1.59077
SNORD68	1.14439	0.762113
SNORD82	1.152	0.846719
MIR3192	1.16993	1.00277
MIR5689HG	1.16993	1.00277
MIR591	1.16993	1.00277
RNU6-1091P	1.16993	1.00277
RNU6-422P	1.16993	1.20181
SNORD105	1.16993	1.00277
SNORD70	1.18641	0.808496
RN7SL44P	1.19265	0.861232
RN7SL704P	1.20163	1.37475
RNA5SP364	1.20645	0.807553
RNA5SP48	1.20645	0.807553
U3	1.20645	0.807553
U6	1.20645	0.807553
Y_RNA	1.20645	0.807553
Y_RNA	1.20645	0.807553
Y_RNA	1.20645	0.807553
Y_RNA	1.20645	0.807553
Y_RNA	1.20645	0.807553
Y_RNA	1.20645	0.807553
Y_RNA	1.20645	0.807553
MIR1238	1.20645	0.807553
MIR134	1.20645	0.807553
MIR326	1.20645	0.807553
MIR3922	1.20645	0.807553
MIR4500	1.20645	0.807553
MIR4725	1.20645	0.807553
MIR5008	1.20645	0.807553
[truncated: 1,481 more rows]

## Sheet: A_lncRNA
gene_name	log2FC	-log10pval
PRICKLE2-AS1	-7.11201	1.37424
ARL2-SNX15	-7.08215	0.60206
AC008870.1	-6.52617	0.60206
AC024267.6	-6.49985	0.60206
LINC01189	-5.54432	1.16355
AL355512.1	-5.26053	1.01587
LINC01781	-5.1964	0.856531
AC023043.1	-5.05889	1.18894
AC008764.7	-4.98489	1.28865
AP000924.1	-4.90689	0.862724
AC009171.2	-4.82443	0.891393
RFX3-AS1	-4.82443	1.23965
AC068533.3	-4.73697	1.38606
LINC00964	-4.64386	1.65621
AL163953.1	-4.54432	0.766189
AL136309.2	-4.54432	1.32642
AC007314.1	-4.54432	1.32642
AL355310.1	-4.47032	0.60206
AL590705.1	-4.43741	1.59151
AL022328.4	-4.43741	0.913629
AC009509.1	-4.35755	0.60206
AC090844.2	-4.35755	0.60206
AC240565.2	-4.35755	0.60206
TMLHE-AS1	-4.35755	0.60206
AC079385.3	-4.32193	1.25742
CD79A	-4.32193	0.968933
KRT18P12	-4.27302	0.629249
MTRNR2L6	-4.26534	0.63691
AL512656.1	-4.23522	0.60206
LINC01297	-4.23522	0.60206
AL161793.1	-4.1964	1.04869
AC104407.1	-4.1964	1.04869
AC005280.1	-4.1964	1.51552
AP000640.1	-4.1964	1.04869
AL391832.3	-4.1964	1.04869
AC007619.1	-4.05889	1.17568
AJ003147.2	-4.05889	0.892577
AC009480.1	-3.9542	0.60206
AC107214.1	-3.9542	0.60206
AC243972.1	-3.9542	0.60206
AC079790.1	-3.90689	1.42347
AL354977.2	-3.90689	1.42347
AC022034.2	-3.90689	1.42347
AL078604.2	-3.90689	1.42347
AC016629.3	-3.90689	1.42347
AL353593.2	-3.90689	1.42347
KIAA1614-AS1	-3.90689	0.961825
LARS2-AS1	-3.90689	0.961825
PHEX-AS1	-3.90689	1.42347
AC135048.1	-3.86942	2.43894
AL049569.1	-3.79008	0.60206
AL121601.1	-3.79008	0.60206
AC008610.1	-3.79008	0.60206
AC034243.1	-3.79008	0.60206
AC138649.1	-3.79008	0.60206
GRTP1-AS1	-3.79008	0.60206
AC004540.1	-3.73697	1.07561
AL035420.2	-3.73697	0.802061
AL391069.3	-3.73697	1.07561
AC005586.1	-3.73697	1.07561
AC011466.1	-3.73697	1.07561
AL392183.1	-3.73697	1.07561
DACT3-AS1	-3.73697	1.07561
LINC02170	-3.73697	1.07561
AC079354.3	-3.60486	0.60206
AL109767.1	-3.60486	0.60206
AC234917.1	-3.60486	0.60206
AL133227.1	-3.60486	0.60206
SEMA3B-AS1	-3.60486	0.60206
U62317.2	-3.54432	0.855342
AC010894.2	-3.54432	1.30683
AL589986.2	-3.54432	1.30683
AC098679.1	-3.54432	0.675503
AC021739.5	-3.54432	0.855342
AC084782.1	-3.54432	1.30683
AL603832.2	-3.54432	1.30683
AC005387.2	-3.54432	1.30683
AC040896.1	-3.54432	1.30683
DDC-AS1	-3.54432	1.30683
LINC00634	-3.54432	1.30683
LINC01182	-3.54432	1.30683
LINC01510	-3.54432	1.30683
PSD2-AS1	-3.54432	0.855342
TTLL11-IT1	-3.54432	1.30683
AL050320.1	-3.39232	0.60206
AC069257.1	-3.39232	0.60206
AC006378.1	-3.39232	0.60206
AC078785.1	-3.39232	0.60206
AC006159.2	-3.39232	0.60206
AC022075.1	-3.39232	0.60206
AC021086.1	-3.39232	0.60206
AC035140.1	-3.39232	0.60206
AC008763.1	-3.39232	0.60206
AC005261.3	-3.39232	0.60206
AL670729.3	-3.39232	0.60206
AC006237.1	-3.39232	0.60206
AC090952.2	-3.39232	0.60206
DPH6-AS1	-3.39232	0.60206
ENO1-AS1	-3.39232	0.60206
LINC00539	-3.39232	0.60206
AL121990.1	-3.32193	0.947282
AL355310.2	-3.32193	0.947282
BX255925.1	-3.32193	0.947282
AC007786.2	-3.32193	0.947282
LINC01358	-3.32193	0.947282
Z69720.1	-3.2578	0.628728
AP003068.1	-3.22239	1.0062
AC073343.2	-3.14296	0.60206
AL596220.1	-3.14296	0.60206
Z82173.1	-3.14296	0.60206
AC133785.1	-3.14296	0.60206
Z95624.1	-3.14296	0.60206
Z99758.1	-3.14296	0.60206
AC123768.1	-3.14296	0.60206
AC022113.1	-3.14296	0.60206
AC010608.1	-3.14296	0.60206
AC090579.1	-3.14296	0.60206
AC083843.1	-3.14296	0.60206
AP000866.5	-3.14296	0.60206
AP003031.2	-3.14296	0.60206
AC145422.1	-3.14296	0.60206
AC026401.1	-3.14296	0.60206
AC005154.5	-3.14296	0.60206
AL390726.4	-3.14296	0.60206
AL139254.2	-3.14296	0.60206
CASK-AS1	-3.14296	0.60206
CERS6-AS1	-3.14296	0.60206
LINC00444	-3.14296	0.60206
LINC01786	-3.14296	0.60206
LINC02410	-3.14296	0.60206
SUCLA2-AS1	-3.14296	0.60206
AL357033.1	-3.05889	1.14792
AL365271.1	-3.05889	1.14792
AL035416.1	-3.05889	1.14792
AC053503.1	-3.05889	1.14792
AC112496.1	-3.05889	1.14792
AC008883.2	-3.05889	1.14792
AC025524.2	-3.05889	1.14792
AC034229.2	-3.05889	1.14792
AC009088.3	-3.05889	1.14792
AC011840.5	-3.05889	1.14792
AC121493.1	-3.05889	1.14792
AC093915.1	-3.05889	1.14792
AC069148.1	-3.05889	1.14792
AL031008.1	-3.05889	1.14792
AL445649.1	-3.05889	1.14792
AC013553.3	-3.05889	1.14792
AP001065.3	-3.05889	1.14792
AC011416.4	-3.05889	1.14792
EHD4-AS1	-3.05889	1.14792
FZD10-AS1	-3.05889	1.14792
AC125611.4	-2.99457	0.625556
AC012615.4	-2.97797	1.88491
AP003354.1	-2.94342	0.875338
AC008080.1	-2.8413	0.60206
AL671511.1	-2.8413	0.60206
AL121574.1	-2.8413	0.60206
AL589990.1	-2.8413	0.60206
AL021396.1	-2.8413	0.60206
AC004835.1	-2.8413	0.60206
AC067945.3	-2.8413	0.60206
AL359962.1	-2.8413	0.60206
AC022445.1	-2.8413	0.60206
AC114814.3	-2.8413	0.60206
AC008080.4	-2.8413	0.60206
AC079089.1	-2.8413	0.60206
AC025754.1	-2.8413	0.60206
AC008443.6	-2.8413	0.60206
AC131953.1	-2.8413	0.60206
AP003472.1	-2.8413	0.60206
AC226119.1	-2.8413	0.60206
AP002433.1	-2.8413	0.60206
AC131009.1	-2.8413	0.60206
AC117498.2	-2.8413	0.60206
AL121852.1	-2.8413	0.60206
AL139021.2	-2.8413	0.60206
AL355102.5	-2.8413	0.60206
AL049780.2	-2.8413	0.60206
AC007601.2	-2.8413	0.60206
AC026254.4	-2.8413	0.60206
AC010319.3	-2.8413	0.60206
AC008734.1	-2.8413	0.60206
AC007250.1	-2.8413	0.60206
AL354809.1	-2.8413	0.60206
AC010205.1	-2.8413	0.60206
AC244153.1	-2.8413	0.60206
EFCAB6-AS1	-2.8413	0.60206
GATA6-AS1	-2.8413	0.60206
KCNC4-AS1	-2.8413	0.60206
LINC00427	-2.8413	0.60206
LINC00622	-2.8413	0.60206
LINC01107	-2.8413	0.60206
LINC01828	-2.8413	0.60206
LINC01936	-2.8413	0.60206
LINC01949	-2.8413	0.60206
OGFR-AS1	-2.8413	0.60206
PLCH1-AS2	-2.8413	0.60206
SLC12A5-AS1	-2.8413	0.60206
TMEM246-AS1	-2.8413	0.60206
AF121898.1	-2.73697	0.771464
AC083836.1	-2.73697	0.771464
AC016877.3	-2.73697	0.771464
AC005740.3	-2.62149	1.4797
AC023509.1	-2.54057	0.58713
AC108134.1	-2.45943	0.60206
AC007182.1	-2.45943	0.60206
CR786580.1	-2.45943	0.60206
AL356124.1	-2.45943	0.60206
AC093901.1	-2.45943	0.60206
AC007271.1	-2.45943	0.60206
AC007036.1	-2.45943	0.60206
AC147651.1	-2.45943	0.60206
AC243836.1	-2.45943	0.60206
AL035413.1	-2.45943	0.60206
AC002451.1	-2.45943	0.60206
AC104781.1	-2.45943	0.60206
AC012485.2	-2.45943	0.60206
AC004990.1	-2.45943	0.60206
AC007365.3	-2.45943	0.60206
AL109945.1	-2.45943	0.60206
AL513188.1	-2.45943	0.60206
AC022201.2	-2.45943	0.60206
AL591368.1	-2.45943	0.60206
AC019055.1	-2.45943	0.60206
AL449403.1	-2.45943	0.60206
AL023584.2	-2.45943	0.60206
AL133417.1	-2.45943	0.60206
AC063944.1	-2.45943	0.60206
AC091948.1	-2.45943	0.60206
AC009720.1	-2.45943	0.60206
AC139491.2	-2.45943	0.60206
AC117422.1	-2.45943	0.60206
AC104791.1	-2.45943	0.60206
AC078906.1	-2.45943	0.60206
AC083973.1	-2.45943	0.60206
AC004080.2	-2.45943	0.60206
AP000424.2	-2.45943	0.60206
AC091534.1	-2.45943	0.60206
AP001107.2	-2.45943	0.60206
AC010247.1	-2.45943	0.60206
AP002008.1	-2.45943	0.60206
AP001085.1	-2.45943	0.60206
AC007688.2	-2.45943	0.60206
AC079360.1	-2.45943	0.60206
AC090502.3	-2.45943	0.60206
AL352984.1	-2.45943	0.60206
AL161757.2	-2.45943	0.60206
AL355834.1	-2.45943	0.60206
AC012409.1	-2.45943	0.60206
AC023908.1	-2.45943	0.60206
AC026992.1	-2.45943	0.60206
AL512634.1	-2.45943	0.60206
AC007638.1	-2.45943	0.60206
AC110285.1	-2.45943	0.60206
CR936218.2	-2.45943	0.60206
AC015878.2	-2.45943	0.60206
AF038458.2	-2.45943	0.60206
AC004221.1	-2.45943	0.60206
AC008743.1	-2.45943	0.60206
AC005197.1	-2.45943	0.60206
AC019080.3	-2.45943	0.60206
AL035530.2	-2.45943	0.60206
AC034236.3	-2.45943	0.60206
AL591686.2	-2.45943	0.60206
AC110609.1	-2.45943	0.60206
AC005632.4	-2.45943	0.60206
AC120498.9	-2.45943	0.901391
AC244131.2	-2.45943	0.60206
AC005391.1	-2.45943	0.60206
AL080312.2	-2.45943	0.60206
AC012409.4	-2.45943	0.60206
AC068506.1	-2.45943	0.60206
AL356275.1	-2.45943	0.60206
AFDN-AS1	-2.45943	0.60206
BBOX1-AS1	-2.45943	0.60206
CATIP-AS1	-2.45943	0.60206
CELSR3-AS1	-2.45943	0.60206
AL033527.5	-2.45943	0.60206
DPYD-IT1	-2.45943	0.60206
GATA3-AS1	-2.45943	0.60206
L3MBTL4-AS1	-2.45943	0.60206
LINC00589	-2.45943	0.60206
LINC00629	-2.45943	0.60206
LINC00958	-2.45943	0.60206
LINC01010	-2.45943	0.60206
LINC01136	-2.45943	0.60206
LINC01587	-2.45943	0.60206
LINC01615	-2.45943	0.60206
LINC01634	-2.45943	0.60206
LINC01895	-2.45943	0.60206
LINC01948	-2.45943	0.60206
LINC02080	-2.45943	0.60206
LINC02094	-2.45943	0.60206
LINC02099	-2.45943	0.60206
LINC02225	-2.45943	0.60206
LINC02274	-2.45943	0.60206
LINC02419	-2.45943	0.60206
LINC02475	-2.45943	0.60206
LINGO1-AS2	-2.45943	0.60206
PRR29-AS1	-2.45943	0.60206
VIPR1-AS1	-2.45943	0.60206
WDR11-AS1	-2.45943	0.60206
AL139254.3	-2.45943	0.60206
AC100771.2	-2.44746	1.55263
AP000692.2	-2.44746	1.26381
AC134772.1	-2.42884	0.642142
AC132219.1	-2.42884	1.57819
AL157895.1	-2.32193	0.900782
AC007849.1	-2.32193	0.900782
AC004917.1	-2.32193	0.900782
AC099509.2	-2.32193	0.900782
AC024901.1	-2.32193	0.900782
AC069437.1	-2.32193	0.900782
AC105129.2	-2.32193	0.900782
AC138625.2	-2.32193	0.900782
AC130456.1	-2.32193	0.900782
AC107952.2	-2.32193	0.900782
AL133215.1	-2.27684	0.568243
AC027698.1	-2.2578	1.4617
AC002470.1	-2.2578	1.4617
LINC01852	-2.2578	1.4617
AC112484.2	-2.23266	0.836014
AC005034.4	-2.20645	1.32733
LINC00884	-2.20645	0.940947
LINC01198	-2.20645	0.940947
AC024909.3	-2.1819	0.54266
AL020996.3	-2.16993	1.34518
HAS2-AS1	-2.14684	0.949208
AL365181.4	-2.12029	0.861935
AC008494.3	-2.11548	0.865521
FP671120.4	-2.11506	0.584181
AL161725.1	-2.08489	0.829938
AF131216.3	-2.08489	1.32085
AC114810.1	-2.05344	0.916242
FP236383.2	-2.0107	0.581142
FP671120.3	-2.0107	0.581142
FP236383.3	-2.0107	0.581142
LINC01146	-1.98313	0.843448
AL034417.3	-1.97797	1.15471
LINC02212	-1.97797	0.876573
AC084024.3	-1.96829	0.705674
AC005306.1	-1.96829	0.705674
ARHGAP26-AS1	-1.96829	0.950947
AL358075.2	-1.94342	1.27091
AC068189.2	-1.94342	1.27091
AC012254.1	-1.94342	0.670972
AL034374.2	-1.94342	1.27091
AL445423.1	-1.94342	1.27091
AC015967.1	-1.94342	1.27091
NPPA-AS1_2	-1.94342	0.670972
AP002986.1	-1.9386	0.60206
AP003774.1	-1.9386	0.60206
AC005342.1	-1.9386	0.60206
AC108066.1	-1.9386	0.60206
AC106786.1	-1.9386	0.60206
AC116609.1	-1.9386	0.60206
AC073626.1	-1.9386	0.60206
AC097059.1	-1.9386	0.60206
AL451105.2	-1.9386	0.60206
AL356489.1	-1.9386	0.60206
AC112518.1	-1.9386	0.60206
AC092667.1	-1.9386	0.60206
AC011899.1	-1.9386	0.60206
AL512303.1	-1.9386	0.60206
AP000281.2	-1.9386	0.60206
AC080129.2	-1.9386	0.60206
AL390866.1	-1.9386	0.60206
AC007405.1	-1.9386	0.60206
AC009264.1	-1.9386	0.60206
AC007879.3	-1.9386	0.60206
AL590999.1	-1.9386	0.60206
AL138731.1	-1.9386	0.60206
AC245014.1	-1.9386	0.60206
AC104076.1	-1.9386	0.60206
AC091806.1	-1.9386	0.60206
AC104462.2	-1.9386	0.60206
AC078788.2	-1.9386	0.60206
AC105415.1	-1.9386	0.60206
AC022140.1	-1.9386	0.60206
AC078850.2	-1.9386	0.60206
AC026414.1	-1.9386	0.60206
AC016598.1	-1.9386	0.60206
AC010255.2	-1.9386	0.60206
AC105384.1	-1.9386	0.60206
AC024581.1	-1.9386	0.60206
AC114316.2	-1.9386	0.60206
AC017007.5	-1.9386	0.60206
AC113615.1	-1.9386	0.60206
AC068228.2	-1.9386	0.60206
AC016405.1	-1.9386	0.60206
AC011726.2	-1.9386	0.60206
AC104561.3	-1.9386	0.60206
AC108449.1	-1.9386	0.60206
AC087277.2	-1.9386	0.60206
AC090124.2	-1.9386	0.60206
AP001646.3	-1.9386	0.60206
AC140847.2	-1.9386	0.60206
AC148477.1	-1.9386	0.60206
AC084291.1	-1.9386	0.60206
AC006206.1	-1.9386	0.60206
AP003559.1	-1.9386	0.60206
AC026358.1	-1.9386	0.60206
AC068305.3	-1.9386	0.60206
AC026765.1	-1.9386	0.60206
AC130415.1	-1.9386	0.60206
AC117377.1	-1.9386	0.60206
AL110292.1	-1.9386	0.60206
AL163636.1	-1.9386	0.60206
AC010478.1	-1.9386	0.60206
AC092325.1	-1.9386	0.60206
AL365361.1	-1.9386	0.60206
AL355493.2	-1.9386	0.60206
AL161912.2	-1.9386	0.60206
AC106754.1	-1.9386	0.60206
AC099314.1	-1.9386	0.60206
AC079171.1	-1.9386	0.60206
AP006547.1	-1.9386	0.60206
AC064805.1	-1.9386	0.60206
AC093849.1	-1.9386	0.60206
AC008555.1	-1.9386	0.60206
AC005736.2	-1.9386	0.60206
AC027281.1	-1.9386	0.60206
AC011825.4	-1.9386	0.60206
AC010761.2	-1.9386	0.60206
AC015813.3	-1.9386	0.60206
AC008738.1	-1.9386	0.60206
AC011511.3	-1.9386	0.60206
AC020911.2	-1.9386	0.60206
AC068473.3	-1.9386	0.60206
AC005498.2	-1.9386	0.60206
AC006116.6	-1.9386	0.60206
AL356740.1	-1.9386	0.60206
AC010615.2	-1.9386	0.60206
AC133794.1	-1.9386	0.60206
AC040174.2	-1.9386	0.60206
AC004233.2	-1.9386	0.60206
AC007687.1	-1.9386	0.60206
AC079610.2	-1.9386	0.60206
AL353135.1	-1.9386	0.60206
AC104958.2	-1.9386	0.60206
AP005131.7	-1.9386	0.60206
AC022296.3	-1.9386	0.60206
AC107294.2	-1.9386	0.60206
AC009229.3	-1.9386	0.60206
AP000569.1	-1.9386	0.60206
BX649632.1	-1.9386	0.60206
AC023983.2	-1.9386	0.60206
AC108747.1	-1.9386	0.60206
AP000229.1	-1.9386	0.60206
AC009163.6	-1.9386	0.60206
AC105020.5	-1.9386	0.60206
AC009318.4	-1.9386	0.60206
AC006449.3	-1.9386	0.60206
AC097478.3	-1.9386	0.60206
AL590096.1	-1.9386	0.60206
AL359693.1	-1.9386	0.60206
AC009159.3	-1.9386	0.60206
AC013553.4	-1.9386	0.60206
AL008638.3	-1.9386	0.60206
AC244517.12	-1.9386	0.60206
AL451007.2	-1.9386	0.60206
AL731555.1	-1.9386	0.60206
AL132857.2	-1.9386	0.60206
AC116353.4	-1.9386	0.60206
AL137785.1	-1.9386	0.60206
ARHGAP19-SLIT1	-1.9386	0.60206
ARHGEF3-AS1	-1.9386	0.60206
CDKN2B-AS1	-1.9386	0.60206
CLRN1-AS1	-1.9386	0.60206
F11-AS1	-1.9386	0.60206
KCNMB2-AS1	-1.9386	0.60206
LINC00112	-1.9386	0.60206
LINC00552	-1.9386	0.60206
LINC00567	-1.9386	0.60206
LINC00967	-1.9386	0.60206
LINC01088	-1.9386	0.60206
LINC01206	-1.9386	0.60206
LINC01238	-1.9386	0.60206
LINC01537	-1.9386	0.60206
LINC01553	-1.9386	0.60206
LINC01597	-1.9386	0.60206
LINC01616	-1.9386	0.60206
LINC01635	-1.9386	0.60206
LINC01742	-1.9386	0.60206
LINC01801	-1.9386	0.60206
LINC01933	-1.9386	0.60206
LINC01998	-1.9386	0.60206
LINC02092	-1.9386	0.60206
LINC02167	-1.9386	0.60206
LINC02268	-1.9386	0.60206
LINC02502	-1.9386	0.60206
MAGI2-AS1	-1.9386	0.60206
PTPRD-AS2	-1.9386	0.60206
RERG-IT1	-1.9386	0.60206
SKAP1-AS1	-1.9386	0.60206
LINC02166	-1.89566	1.14306
AL445231.1	-1.87447	0.693338
AL359317.2	-1.8625	0.93839
AC099668.1	-1.8625	0.741558
AC080013.5	-1.8625	0.634385
AL627443.1	-1.85148	0.540193
HOXB-AS1	-1.848	1.31345
AL359921.1	-1.80735	1.20181
LINC02015	-1.80255	1.09926
AP003392.6	-1.79837	1.08269
AC131235.4	-1.79837	1.08269
AL592071.1	-1.79837	0.73354
LYST-AS1	-1.79837	1.08269
AC090192.2	-1.78715	0.84767
AL136982.1	-1.76152	0.971764
AC069360.1	-1.73697	1.71647
AC013356.2	-1.73697	1.03857
AC138627.1	-1.73697	0.798823
AC008972.2	-1.73697	1.03857
AC093462.1	-1.73697	1.03857
SFTPD-AS1	-1.73697	1.19028
AC004771.5	-1.73361	0.525294
AC025271.2	-1.72583	0.549438
AC012464.3	-1.72583	0.549438
WT1-AS_1	-1.72583	0.549438
LINC01630	-1.72583	0.549438
AL162258.1	-1.7137	0.529989
LINC01001	-1.70178	0.683476
AL451064.1	-1.70044	0.989631
BX324167.2	-1.67807	0.630341
AC009686.1	-1.66658	0.951579
AC092354.1	-1.66626	0.530301
LINC01364	-1.66626	0.530301
LINC01832	-1.66626	0.530301
AC105020.6	-1.66297	0.739787
AC009065.6	-1.62902	0.518676
AC231981.1	-1.62734	0.877831
Z97192.1	-1.62149	1.09287
AC022509.2	-1.62149	0.708972
AC020917.2	-1.62149	0.708972
AL162591.1	-1.60572	1.07313
AL451070.1	-1.60572	1.07313
AL078645.1	-1.60572	0.776365
AC009509.4	-1.60572	1.07313
KIF25-AS1	-1.60572	1.07313
LARGE-IT1	-1.60572	1.07313
WEE2-AS1	-1.60572	1.07313
AC010733.2	-1.60334	0.564191
AC062015.1	-1.59946	1.01094
AC016866.2	-1.59946	1.01094
AC104365.2	-1.5961	0.598943
AC010997.4	-1.5961	0.92421
ARHGAP31-AS1	-1.59401	0.942547
AL445209.1	-1.59258	0.885097
AP002340.1	-1.58496	0.830962
AL512274.1	-1.58496	1.59077
AL390208.1	-1.58496	0.569024
PSMD5-AS1	-1.54827	0.671267
AC008011.2	-1.53766	0.710595
AC013652.1	-1.52356	1.20181
AC005618.1	-1.5025	0.867101
FAM167A-AS1	-1.48543	1.13057
AL157400.3	-1.48063	0.911952
AC018552.4	-1.48063	0.690727
AC023481.1	-1.45943	1.12841
AC116049.2	-1.45943	0.539766
AC019129.2	-1.45943	1.34518
AC083900.1	-1.45403	0.811004
AC067735.1	-1.45403	0.624244
AL158207.2	-1.45372	0.516502
AC026746.1	-1.45372	0.516502
LINC02158	-1.45372	0.516502
AL354892.2	-1.44746	0.89578
AC093801.1	-1.44746	0.831719
BX005019.1	-1.44746	0.650365
AC124804.1	-1.44746	0.89578
AC137630.3	-1.44746	0.831719
FAM222A-AS1	-1.44746	0.831719
AL583824.1	-1.43211	0.859683
AC008937.2	-1.43211	0.817488
AC127002.1	-1.41504	0.555902
AP000892.2	-1.41504	0.676298
AQP4-AS1	-1.41504	1.00277
NECTIN3-AS1	-1.40632	0.766067
P4HA3-AS1	-1.40599	0.515493
AC117395.3	-1.40136	0.844217
AC138035.1	-1.39855	0.835585
AC010333.2	-1.38333	0.862983
AC130456.2	-1.38333	0.862983
Z69706.1	-1.38333	0.862983
AC104662.1	-1.38333	0.828223
AC020661.4	-1.38003	0.82034
AC069222.1	-1.37851	1.82598
AL109811.2	-1.36257	0.867101
AL161909.2	-1.36257	1.46038
AC020931.1	-1.36257	1.07186
AC007638.2	-1.35364	0.880058
LINC00886	-1.3505	1.22191
AP002761.3	-1.34465	0.807886
AL390838.1	-1.34395	0.528615
AP003065.1	-1.34395	0.528615
AC021683.1	-1.34395	0.528615
AL022067.1	-1.34395	0.528615
Z96074.1	-1.34395	0.528615
LINC01971	-1.34395	0.528615
AL158835.1	-1.33587	0.540385
AP001094.1	-1.32193	0.60206
AC010201.1	-1.32193	0.550174
AF287957.1	-1.32193	0.989631
AL008718.2	-1.32193	0.989631
AP001574.1	-1.30633	0.712105
AF196972.1	-1.30203	0.784414
AC097478.1	-1.29445	0.629744
AL513318.2	-1.29445	0.769633
MBNL1-AS1	-1.28011	0.589481
AC096649.1	-1.27753	0.77995
AC009656.1	-1.27753	0.814731
AC093330.1	-1.27753	0.814731
AC074044.1	-1.27753	0.77995
AC022079.2	-1.27753	0.77995
AC138150.1	-1.25664	0.7222
AL024508.2	-1.24393	0.719181
AL109917.1	-1.22239	1.10802
AC084262.1	-1.22239	0.703477
AL136221.1	-1.22239	1.27748
AL512662.2	-1.22239	1.27748
VLDLR-AS1	-1.22239	0.81051
AF106564.1	-1.21759	0.73691
AATK-AS1	-1.21759	0.73691
ITFG2-AS1	-1.2115	0.869146
AL117378.1	-1.20645	0.807553
AL137847.2	-1.20645	0.807553
AC092378.1	-1.20645	0.807553
AC093426.1	-1.20645	0.807553
AC083801.2	-1.20645	0.807553
AC121333.1	-1.20645	0.807553
AC093484.2	-1.20645	0.807553
AC064836.2	-1.20645	0.807553
AC087645.2	-1.19482	0.634861
LINC00592	-1.17897	0.622861
CARD8-AS1	-1.17834	0.615632
AL442071.1	-1.16993	0.800822
AC009831.1	-1.16993	0.504787
AC114271.1	-1.16993	1.17872
AL096678.1	-1.15899	0.658637
AC055764.1	-1.152	0.647239
AC012508.1	-1.152	0.846719
AC124319.3	-1.152	0.958652
LINC01426	-1.152	0.80753
AC022400.3	-1.1375	0.570058
LINC00310	-1.1375	0.865521
AL139039.3	-1.1321	0.661059
AC010320.2	-1.12553	0.759576
AL590609.3	-1.12029	0.782138
AL158212.2	-1.12029	0.782138
AC010198.1	-1.12029	0.782138
AC122134.1	-1.12029	0.782138
AL512329.2	-1.12029	0.782138
AL357078.3	-1.12029	0.782138
AC004948.1	-1.12029	0.782138
AL023881.1	-1.12029	0.782138
DLX6-AS1	-1.12029	0.782138
FGF14-IT1	-1.12029	0.782138
LINC00501	-1.12029	0.782138
MACROD2-IT1	-1.12029	0.782138
SATB2-AS1	-1.12029	0.782138
TRHDE-AS1	-1.12029	0.782138
AL354956.1	-1.11548	0.60206
BX284668.1	-1.11548	0.60206
AL139158.2	-1.11548	0.60206
AL158055.1	-1.11548	0.60206
AC009229.2	-1.11548	0.60206
AC004870.3	-1.11548	0.60206
AL731684.2	-1.11548	0.60206
AC013286.1	-1.11548	0.60206
AC004448.4	-1.11548	0.60206
AP000688.4	-1.11548	0.60206
AC117386.2	-1.11548	0.60206
AL357153.1	-1.11548	0.60206
AC122707.1	-1.11548	0.60206
AC020659.2	-1.11548	0.60206
AC069287.1	-1.11548	0.60206
AC091047.1	-1.11548	0.60206
AC239802.1	-1.11548	0.60206
AP001972.4	-1.11548	0.60206
AC068385.1	-1.11548	0.60206
AC034102.3	-1.11548	0.60206
AL512356.1	-1.11548	0.60206
AC104002.1	-1.11548	0.60206
AC015722.1	-1.11548	0.60206
AC087477.5	-1.11548	0.60206
AC022087.1	-1.11548	0.60206
AC007610.1	-1.11548	0.60206
AC136618.1	-1.11548	0.60206
AC011467.1	-1.11548	0.60206
AC131649.1	-1.11548	0.60206
AC009486.1	-1.11548	0.60206
AC092142.1	-1.11548	0.60206
AL731537.2	-1.11548	0.60206
AC004023.1	-1.11548	0.60206
AC079414.1	-1.11548	0.60206
AP005120.1	-1.11548	0.60206
AC104996.1	-1.11548	0.60206
AC090772.3	-1.11548	0.60206
AC008747.1	-1.11548	0.60206
AC105094.2	-1.11548	0.60206
AP002505.1	-1.11548	0.60206
AC091044.1	-1.11548	0.60206
AC105105.3	-1.11548	0.60206
AC008764.3	-1.11548	0.60206
AL009178.2	-1.11548	0.60206
AL356740.2	-1.11548	0.60206
AL023806.2	-1.11548	0.60206
AC008667.4	-1.11548	0.60206
AC063962.1	-1.11548	0.60206
AC245297.2	-1.11548	0.60206
AC107294.1	-1.11548	0.60206
AC073352.2	-1.11548	0.60206
AC093865.1	-1.11548	0.60206
AL031587.4	-1.11548	0.60206
AP001065.2	-1.11548	0.60206
AC009831.4	-1.11548	0.60206
AL136964.1	-1.11548	0.60206
AC008250.2	-1.11548	0.60206
AC021755.4	-1.11548	0.60206
AC125603.4	-1.11548	0.60206
AC009093.6	-1.11548	0.60206
AL627230.8	-1.11548	0.60206
FP325330.2	-1.11548	0.60206
PACRG-AS3	-1.11548	0.60206
AC024614.4	-1.11548	0.60206
LINC00265-3P	-1.11548	0.60206
LINC00534	-1.11548	0.60206
LINC01124	-1.11548	0.60206
LINC01185	-1.11548	0.60206
LINC01225	-1.11548	0.60206
LINC01237	-1.11548	0.60206
LINC01722	-1.11548	0.60206
LINC02402	-1.11548	0.60206
LINC02438	-1.11548	0.60206
LINGO3	-1.11548	0.60206
ZNF793-AS1	-1.11548	0.60206
AC016708.1	-1.11548	0.603793
AC107072.2	-1.11548	0.607428
AC091053.2	-1.11548	0.956975
AL390719.2	-1.11548	1.19028
LINC01484	-1.11548	0.704583
AL136988.2	-1.11189	0.866298
AC093591.2	-1.10257	1.07591
AC097467.3	-1.09954	0.671758
AP002852.2	-1.09311	0.719609
AC011511.5	-1.09311	0.899584
AC110792.4	-1.08746	0.989631
AC015921.1	-1.08671	0.664041
Z84485.1	-1.08489	0.715685
AL358937.1	-1.08489	0.64114
AC010333.1	-1.08489	0.523894
AC016168.1	-1.08489	0.715685
IL21R-AS1	-1.08489	0.715685
LINC02228	-1.08375	0.898833
AC129507.3	-1.078	0.894171
AC024075.3	-1.078	1.40225
SSTR5-AS1	-1.074	0.634859
LIX1L-AS1	-1.06711	0.590594
AC004160.2	-1.06559	0.682836
AC007731.4	-1.06559	0.682836
AP001830.1	-1.06559	0.682836
AC132872.2	-1.06559	0.682836
AL512598.1	-1.06559	0.682836
AC128687.2	-1.06559	0.573064
LINC00677	-1.06559	0.665966
LINC01220	-1.06559	0.682836
LINC01260	-1.06559	0.665966
UST-AS1	-1.06559	0.682836
AC067930.5	-1.06066	0.638386
AL162584.1	-1.05889	1.56333
AL355102.4	-1.05889	0.650654
AC022872.1	-1.05889	0.928392
AL133353.1	-1.04509	0.652876
AC069503.1	-1.04509	0.627584
AC092614.1	-1.03953	0.786484
AL358072.1	-1.03899	0.593231
AL591684.2	-1.03814	0.576115
AC027117.2	-1.03747	0.624746
AC015727.1	-1.03435	0.64805
AC004812.2	-1.03148	0.610218
AL607028.1	-1.0307	0.642589
LINC02532	-1.02564	1.03694
AL513283.1	-1	0.989631
AC010210.1	-1	1.28198
AC019270.1	-1	0.60206
AC087362.1	-1	0.830962
AP000755.1	-1	0.960326
AC007249.2	-1	0.60206
AC084757.3	-1	0.888515
AC098818.2	-1	0.567633
AC109460.1	-1	1.12883
AC009097.3	-1	0.546299
AC099398.1	-1	0.60206
AC007228.1	-1	0.757104
AP003680.1	-1	1.20181
AP001330.5	-1	1.00277
AC011816.2	-1	0.834321
AC026979.4	-1	0.676298
AL158211.4	-1	0.60206
AC024560.3	-1	0.989631
AC099521.2	-1	0.800822
AC020656.2	-1	0.989631
FP236315.3	-1	0.60206
CR392000.2	-1	0.60206
ITCH-AS1	-1	0.646304
LINC00284	-1	0.542112
LINC01226	-1	1.20181
RHOXF1-AS1	-1	1.00277
VASH1-AS1	-1	0.984593
LINC00342	-0.977974	0.75931
ZNF337-AS1	-0.976878	1.39594
AC104534.1	-0.968291	0.690598
BRWD1-AS2	-0.961526	0.702092
AC007298.1	-0.961181	0.604861
AC025176.1	-0.957356	0.60206
LINC02193	-0.954196	1.12883
AC015853.1	-0.946889	0.607477
AL109976.1	-0.932886	0.633587
AC114550.1	-0.929611	0.608711
AP002449.1	-0.929611	0.608711
MYLK-AS2	-0.929611	0.608711
AC117382.2	-0.925999	1.33861
LINC01977	-0.917538	0.726646
AC016746.1	-0.915936	0.609169
SBF2-AS1	-0.913768	0.934927
AP001469.1	-0.906891	0.659506
LINC00449	-0.906891	0.607428
AC040970.1	-0.903785	0.832659
VAC14-AS1	-0.901085	0.589193
AC087752.3	-0.900464	0.735762
AL139082.1	-0.895663	0.60206
AL022329.2	-0.893085	0.562637
AC106028.2	-0.893085	0.865521
AC243830.2	-0.893085	0.666156
AC092111.2	-0.893085	0.564614
BX088651.4	-0.88594	0.564267
AP000688.1	-0.884523	0.668182
LINC01270	-0.882816	0.706306
AL353759.1	-0.880418	0.638488
AL356481.1	-0.874469	0.582782
AL391069.2	-0.874469	0.637197
AC104596.1	-0.874469	0.609166
AC005833.2	-0.874469	0.764419
AC025031.1	-0.874469	0.960326
AC008121.3	-0.874469	0.60206
MAPT-IT1	-0.874469	1.00277
E2F3-IT1	-0.868755	1.45227
AC007319.1	-0.867896	1.53973
AC116407.1	-0.862496	0.60206
AC011294.1	-0.862496	0.60206
AC012377.1	-0.862496	0.591681
AC007598.1	-0.862496	0.591681
AC113139.1	-0.862496	0.591681
AL354872.2	-0.862496	0.591681
AC027682.6	-0.862496	0.60206
LINC01060	-0.862496	0.60206
AC092849.2	-0.862496	0.693739
HOXD-AS2	-0.862496	0.530827
AC006262.2	-0.859822	0.654272
SOX21-AS1	-0.85561	0.58848
EP300-AS1	-0.853779	0.559025
AL356966.1	-0.847997	0.689015
AC021491.2	-0.847997	0.638958
AC107884.1	-0.847997	0.919446
AC007569.1	-0.847997	0.546299
AC073263.2	-0.847997	0.652377
LINC00484	-0.847997	0.703477
LINC01431	-0.847997	0.830962
LINC01003	-0.843881	1.12091
AC007673.1	-0.839535	0.767829
AC092755.2	-0.836501	0.777661
AL158163.2	-0.836501	1.07186
AP002851.1	-0.834576	1.0033
AC092809.4	-0.832543	0.562267
AP003119.2	-0.832273	0.685994
AC073957.1	-0.830075	0.631409
AC007114.1	-0.830075	0.816199
AC008406.3	-0.823122	0.633587
SEPT7-AS1	-0.823122	1.10304
AC002384.1	-0.815575	0.904157
AC007040.1	-0.807355	0.60206
AL022068.1	-0.807355	0.554779
AP000893.2	-0.807355	0.598739
AC120036.5	-0.807355	0.69897
AC138915.4	-0.807355	0.60206
AC004702.1	-0.807355	0.60206
AC011503.2	-0.807355	0.606959
AL357054.4	-0.807355	0.60206
AC046143.2	-0.807355	0.989631
AC016747.4	-0.807355	0.638584
AC025166.1	-0.807355	0.60206
ARHGEF9-IT1	-0.807355	0.757104
SMAD5-AS1	-0.804276	1.37322
AL139095.4	-0.80408	0.553396
AC005920.2	-0.80408	0.55156
AC006942.1	-0.80408	0.553396
EAF1-AS1	-0.801454	0.741433
AF127936.2	-0.798366	0.60206
AC093281.2	-0.798366	0.60206
AC004381.1	-0.798366	0.60206
AL359851.1	-0.798366	0.60206
AL160286.3	-0.798366	0.60206
AC006116.4	-0.798366	0.60206
AC004775.1	-0.798366	0.533779
AC108673.2	-0.798366	0.533779
AL008723.3	-0.798366	0.60206
AC099518.6	-0.798366	0.60206
DELEC1	-0.798366	0.60206
BEAN1-AS1	-0.798366	0.60206
LINC01598	-0.798366	0.533779
AP003419.3	-0.796467	0.984593
SPRY4-IT1	-0.793549	0.583411
AL022157.1	-0.788496	0.652483
AC016597.1	-0.788496	0.598719
AL021807.1	-0.788496	0.524475
AL161729.3	-0.784271	1.56333
AC018816.1	-0.782769	0.536337
AL590133.2	-0.782769	0.537486
AC093249.6	-0.78136	0.560506
AC138956.1	-0.777608	0.609166
AC108673.3	-0.777608	1.44658
AL354760.1	-0.777608	0.764419
AC010538.1	-0.777608	1.20181
AL442125.2	-0.777608	0.676298
LINC01140	-0.777608	0.555902
AC009065.4	-0.773724	0.88347
CU638689.4	-0.770952	0.884376
AC011676.2	-0.770518	2.1673
AL138690.1	-0.765535	0.704583
AC009309.1	-0.765535	0.570621
CDC37L1-AS1	-0.763933	0.54256
LINC00933	-0.763933	0.54256
CPS1-IT1	-0.762576	0.673626
AL049646.1	-0.758992	0.901391
AC090425.2	-0.758992	0.781156
AC009120.6	-0.754888	0.676191
AL590729.1	-0.754244	0.524833
AC005884.1	-0.752072	0.630827
CYP1B1-AS1	-0.752072	0.803474
AC026801.3	-0.750022	0.636047
LINC01232	-0.750022	0.60206
AC020658.3	-0.748461	1.08205
AC022306.2	-0.748461	1.7281
AC078850.1	-0.747234	1.80058
AL596094.1	-0.747019	0.517827
TM4SF1-AS1	-0.745427	0.729668
NKIRAS1	-0.741591	0.847783
AC007128.1	-0.736966	1.10299
AL121748.1	-0.736966	0.984593
AC073111.1	-0.736966	1.59077
AC104350.1	-0.736966	0.888515
AC091987.1	-0.736966	0.505268
AC007952.7	-0.736966	1.05749
AC106037.1	-0.736966	0.505268
AC007922.2	-0.736966	0.834321
AC061975.7	-0.736966	0.834321
AC022382.1	-0.736966	0.834321
AP001554.1	-0.736966	0.834321
AL133406.3	-0.736966	0.834321
AC116036.2	-0.736966	0.834321
AC012360.2	-0.736966	0.505268
AC067747.1	-0.736966	0.834321
AC005695.3	-0.736966	0.505268
AC106028.5	-0.736966	0.834321
AC007998.4	-0.736966	0.834321
AC068338.3	-0.736966	0.505268
AC090206.1	-0.736966	0.608066
AC025287.2	-0.736966	0.834321
AL356752.1	-0.736966	0.834321
AL008638.6	-0.736966	0.666156
LINC01585	-0.736966	0.660471
STX18-IT1	-0.736966	0.60206
AL109811.3	-0.729911	0.853375
AL451164.3	-0.726077	0.511188
AL356512.1	-0.725825	0.683085
AC097717.1	-0.724366	1.12883
AC074366.1	-0.72289	0.512292
ITGB2-AS1	-0.722466	0.604044
HNF1A-AS1	-0.720364	0.635415
AC099066.2	-0.719892	0.582038
AC008655.2	-0.717066	0.516419
RRS1-AS1	-0.716207	1.13057
AL358790.1	-0.714598	0.507124
AC011773.1	-0.710493	0.605255
AL022069.1	-0.710493	0.798823
AC023983.1	-0.710493	1.19028
AL354696.1	-0.710493	1.19028
SH3PXD2A-AS1	-0.710493	1.19028
TNKS2-AS1	-0.710493	0.515112
AL162377.1	-0.704544	0.899584
RDH10-AS1	-0.704015	1.18523
AC012236.1	-0.703018	0.525234
AC079148.1	-0.703018	0.501624
AL049555.1	-0.70044	0.800822
AC015540.1	-0.70044	0.800822
LCMT1-AS1	-0.70044	0.555902
REV3L-IT1	-0.70044	0.800822
RUVBL1-AS1	-0.70044	1.00277
AC017100.1	-0.691878	0.924113
ATG10-IT1	-0.691878	0.642997
AC018557.2	-0.685891	0.691143
AC105020.1	-0.678072	1.13057
AL354824.2	-0.678072	0.60206
AC116535.1	-0.678072	0.823079
AC044802.1	-0.678072	0.69897
AC008147.2	-0.678072	0.989631
AC006116.8	-0.678072	0.608429
AC017048.3	-0.678072	0.757104
AC012511.1	-0.678072	0.757104
AC007881.3	-0.678072	0.598739
AC107214.2	-0.678072	1.13057
AC004854.2	-0.678072	0.531435
AP000553.1	-0.678072	0.989631
AL451074.6	-0.678072	0.757104
AL135999.2	-0.678072	0.757104
AL121583.1	-0.678072	0.529932
ADGRD1-AS1	-0.678072	0.989631
LINC00328-2P	-0.678072	1.07585
LINC00973	-0.672114	0.860033
AL354733.3	-0.669851	0.739787
AL080250.1	-0.667425	0.641142
AC114401.1	-0.667425	1.14719
AC018766.1	-0.667425	0.535914
LINC01024	-0.667425	0.650094
AL591895.1	-0.665581	0.89785
AL645608.1	-0.664673	0.61775
AL139241.1	-0.662965	0.889811
AC007599.2	-0.662965	0.725411
AC027117.1	-0.66069	0.520803
AL450384.1	-0.652077	0.992877
AL391839.1	-0.652077	0.703477
AL354824.1	-0.652077	0.652377
AL035681.1	-0.652077	0.690795
AC020661.1	-0.652077	0.606529
AC055764.2	-0.652077	0.546299
AC011815.2	-0.652077	0.703477
AC068831.8	-0.652077	0.539999
AC008522.1	-0.652077	0.546299
LINC01285	-0.652077	0.546299
AP002478.1	-0.647698	0.86411
AL137145.1	-0.643856	0.576552
AC007014.2	-0.643856	1.45317
AL606970.1	-0.642448	0.635165
AC098487.1	-0.641546	0.675037
AL157400.4	-0.640458	0.674963
AC062017.1	-0.63743	0.676298
AC105345.2	-0.63743	0.667944
AC022001.3	-0.63743	0.555902
AC104964.2	-0.633872	1.33933
AC012370.1	-0.632268	0.846719
LIN28B	-0.631398	0.848851
AC025871.2	-0.628031	0.660471
AL121578.3	-0.628031	0.666156
AC011330.2	-0.628031	0.865521
AC003101.2	-0.628031	0.660471
LINC01238	-0.628031	0.865521
LINC02018	-0.628031	0.865521
LINC02449	-0.628031	0.666156
AC022916.1	-0.624491	0.567301
AC096582.1	-0.621488	0.60206
AL158834.2	-0.621488	0.650195
AL450345.1	-0.621488	0.60206
AC060234.2	-0.621488	0.60206
AC239802.2	-0.621488	0.60206
AL589182.1	-0.621488	0.816199
AC122685.1	-0.621488	0.60206
AL359397.2	-0.621488	0.60206
AL133467.3	-0.621488	0.60206
AL731533.2	-0.621488	1.19028
AC245008.1	-0.621488	0.60206
AC108125.1	-0.621488	0.60206
AC087741.2	-0.621488	0.577914
AC090527.3	-0.621488	0.659506
AC233263.6	-0.621488	0.60206
LINC00895	-0.621488	0.60206
NR2F2-AS1	-0.621488	0.825077
LINC00482	-0.61891	0.650908
AP000866.1	-0.618129	0.626686
LINC01783	-0.616671	0.524475
MAP3K20-AS1	-0.616671	0.785178
AC079921.2	-0.612977	0.573756
AL645608.9	-0.612977	0.646304
AL590783.1	-0.611435	0.735482
AC084018.1	-0.610053	0.537367
LINC01559	-0.610053	0.504787
PLCH1-AS1	-0.610053	0.505334
AC012358.1	-0.606658	1.11277
AC022165.1	-0.606658	1.59507
AC092343.1	-0.606336	0.980653
AC009506.1	-0.601451	0.757104
MID1IP1-AS1	-0.601451	1.07305
AC007952.2	-0.601173	0.718816
AC092691.1	-0.600393	0.554652
AL135787.1	-0.597902	0.7294
AC123904.1	-0.584963	0.60206
AC016716.2	-0.584963	0.60206
AC093422.2	-0.584963	0.60206
BX255923.1	-0.584963	0.60206
AC093382.1	-0.584963	0.60206
AC006455.5	-0.584963	0.60206
U73166.1	-0.584963	0.838084
AL645608.3	-0.584963	0.817232
AC121158.1	-0.584963	0.60206
AC098617.1	-0.584963	1.06324
AL162254.1	-0.584963	0.60206
AC006159.1	-0.584963	0.535869
AC010307.2	-0.584963	0.764419
AC105001.1	-0.584963	0.60206
AC116424.1	-0.584963	0.60206
AF279873.3	-0.584963	0.60206
AC046130.2	-0.584963	0.757104
AC009318.1	-0.584963	0.667944
AL049835.1	-0.584963	0.520438
AC012640.2	-0.584963	0.714678
AP001527.1	-0.584963	0.757104
AC026471.2	-0.584963	1.00277
AC110921.1	-0.584963	0.60206
AP001542.3	-0.584963	0.607428
AC099811.3	-0.584963	0.60206
AC073188.6	-0.584963	0.60206
AC012313.6	-0.584963	0.800822
AC068620.2	-0.584963	0.53841
AL356488.2	-0.584963	0.60206
AC019080.4	-0.584963	0.834321
AC092687.3	-0.584963	0.60206
AC007128.2	-0.584963	0.660471
AL031587.3	-0.584963	0.60206
AC106739.1	-0.584963	0.655329
AC040169.3	-0.584963	1.59077
AC092111.1	-0.584963	0.834321
AL121890.3	-0.584963	0.60206
AC121338.2	-0.584963	0.667944
AC002094.5	-0.584963	1.07585
AC024610.2	-0.584963	0.558473
AC090983.1	-0.584963	0.60206
AL627171.2	-0.584963	0.764419
AL031432.5	-0.584963	0.513046
ENTPD3-AS1	-0.584963	0.658869
LINC01090	-0.584963	0.60206
LINC01427	-0.584963	0.60206
LINC02249	-0.584963	0.60206
LURAP1L-AS1	-0.584963	0.834321
TOB1-AS1	-0.584963	0.525465
LINC02535	-0.58123	2.06558
LINC00488	-0.572579	1.1564
AC244197.2	-0.571906	0.564033
AP001432.1	-0.570316	0.730904
LINC01116	-0.569615	0.566117
TAF1A-AS1	-0.568284	0.554414
AC005920.1	-0.565597	0.636884
LINC00618	-0.565597	0.780285
AP002884.3	-0.563901	0.846719
AC109347.1	-0.563901	0.6018
AC016999.1	-0.561879	0.537367
AL121839.2	-0.559427	0.512664
AC011445.2	-0.559427	0.551564
UGDH-AS1	-0.557482	0.513931
AL096677.1	-0.556393	0.995875
AC005154.1	-0.554083	0.586865
AC007639.1	-0.553598	0.564756
AL162632.3	-0.552541	0.577914
AC015961.1	-0.552541	0.889811
THUMPD3-AS1	-0.551914	0.522016
LINC01184	-0.54788	0.661263
AC087276.4	-0.547488	0.865521
AC103691.1	-0.547488	0.865521
ID2-AS1	-0.546282	0.624225
AL354733.2	-0.545434	0.55865
AC104113.1	-0.545434	0.645115
AC027307.2	-0.544996	0.859003
AC018797.2	-0.544321	1.07186
LINC02024	-0.544321	0.571049
AC098820.1	-0.540568	1.20181
AC007126.1	-0.540568	0.667944
AC011498.3	-0.540568	1.00277
AC010201.2	-0.540568	0.785014
AC106028.4	-0.540568	0.800822
AL512652.1	-0.536053	0.551564
AL590004.4	-0.533824	1.32552
AC006116.5	-0.533432	0.738007
AC009133.1	-0.5333	0.507739
Z97652.1	-0.530515	0.652377
AC233728.1	-0.530515	0.703477
AF241728.1	-0.530515	0.652377
AC091045.1	-0.530515	0.505194
AC012531.1	-0.530515	0.592344
AC092718.5	-0.530515	0.546299
BX539320.1	-0.530515	0.703477
NTRK3-AS1	-0.529467	0.559738
AL731577.2	-0.527932	0.812487
AP002026.1	-0.526069	0.676191
AC008735.4	-0.526069	0.50605
AC010168.2	-0.523933	0.597118
AC010643.1	-0.523562	1.19028
LINC00506	-0.523562	0.70658
LINC01134	-0.523562	1.34518
MED4-AS1	-0.523562	0.798823
AL031779.1	-0.520832	0.572344
AC022211.3	-0.517399	0.683918
AC007541.1	-0.517058	0.748146
AL683813.1	-0.514573	0.545017
AC016576.1	-0.514573	0.531435
AC005614.1	-0.514573	0.513165
AC016957.2	-0.514573	0.598739
RBMS3-AS3	-0.514573	0.757104
LINC00942	-0.514573	0.757104
WWC2-AS2	-0.514573	0.598739
AC007952.1	-0.512206	0.613201
CD44-AS1	-0.511899	0.672373
BCDIN3D-AS1	-0.51134	1.18705
AC023090.1	-0.509014	1.46038
NUP50-AS1	-0.50696	0.629548
AC007952.6	-0.505891	0.680278
AC008731.1	-0.505235	0.584852
AL160314.2	-0.5025	0.764419
AC233266.2	-0.5025	0.585011
AC009121.2	-0.5025	0.667944
AC104971.2	-0.5025	0.800822
AL022238.3	-0.5025	1.00277
Z93930.3	-0.5025	0.520438
AC145423.2	-0.5025	1.00277
LINC00261	-0.501398	0.530639
LINC01719	-0.501194	0.65812
AC243965.2	-0.500898	0.506286
LINC00887	-0.500429	0.640579
AL391427.1	-0.497587	0.545235
AC003102.1	-0.4975	0.889811
AC073896.3	-0.494765	1.07585
AC090515.2	-0.49304	0.687062
DENND5B-AS1	-0.49304	0.988326
LINC02352	-0.49304	0.687062
HOXC-AS3	-0.485427	0.834321
AC073263.1	-0.485427	0.834321
AC023051.1	-0.485427	0.608066
AL354928.1	-0.485427	0.834321
AC079226.2	-0.485427	0.608066
AC008467.1	-0.485427	1.05749
AC023790.2	-0.485427	0.505268
AL135905.2	-0.485427	0.642997
AC010531.6	-0.485427	0.614837
AL035427.1	-0.485427	0.505268
AC100812.1	-0.485427	0.834321
AC097505.1	-0.485427	0.834321
AC034102.8	-0.485427	0.505268
BSN-AS2	-0.485427	0.865521
PIK3IP1-AS1	-0.485427	0.865521
PTGES2-AS1	-0.485427	0.894171
VWA8-AS1	-0.485427	0.60206
LINC01089	-0.483816	0.561918
NNT-AS1	-0.47961	0.795282
AL162231.2	-0.479168	0.692522
AC092301.1	-0.478047	0.777661
AC087276.2	-0.476438	0.663562
AC012184.3	-0.474909	0.722045
AL138762.1	-0.473931	0.659506
Z69666.1	-0.469485	1.47466
AL139300.2	-0.469485	0.609166
AC007823.1	-0.469485	0.960326
AL133445.2	-0.469485	0.555342
NAGPA-AS1	-0.469485	1.00277
AC011462.4	-0.466568	0.798823
AC073130.1	-0.465664	0.524475
AC107993.1	-0.465664	0.574781
PSMG3-AS1	-0.464963	1.29148
AC013472.3	-0.464668	0.820841
LINC00862	-0.463247	0.653836
PAPPA-AS2	-0.462972	1.48095
AP001351.1	-0.459432	0.989631
AC093274.1	-0.459432	0.989631
AL355102.1	-0.459432	0.687855
AC110597.1	-0.459432	0.598739
AL118558.4	-0.459432	0.531435
AC004982.2	-0.459432	0.989631
INTS9-AS1	-0.459432	0.60206
LINC00957	-0.459432	0.60206
AL365181.2	-0.459093	1.12306
POC1B-AS1	-0.458488	0.923252
AL590399.1	-0.458291	0.538129
AC005837.1	-0.457207	0.619886
AL008729.1	-0.456858	0.563563
AC010654.1	-0.456858	0.711379
AL162586.1	-0.455945	0.534594
AL445524.1	-0.455679	0.730243
AC106028.3	-0.454566	0.845217
AC106017.2	-0.453173	0.543751
AL513365.2	-0.452512	1.34518
AC007681.1	-0.452512	0.570621
PSPC1-AS2	-0.452512	0.97847
SRD5A3-AS1	-0.452512	0.562308
AL358472.5	-0.449307	0.870193
AC009902.2	-0.447459	0.546299
AL133297.1	-0.447459	0.539999
AC090617.6	-0.447459	0.703477
AC006449.6	-0.446064	0.790777
AC106864.1	-0.444785	1.18346
AC008434.1	-0.443607	1.13057
AC023908.3	-0.443607	0.662593
AL023803.3	-0.443607	0.513165
AC084018.2	-0.442518	0.64034
AC011676.1	-0.440573	0.676298
AC092127.2	-0.440573	0.609166
AC036108.2	-0.438121	0.532701
AC090948.3	-0.436099	0.564614
AL121772.1	-0.436099	0.608429
SMC5-AS1	-0.436099	0.666156
AL163051.1	-0.434403	0.584852
CR381653.1	-0.432771	0.7692
AC018410.2	-0.432441	0.733266
AL132780.2	-0.431339	0.618866
AC114812.2	-0.430634	0.785178
AC019080.5	-0.428843	0.747428
BIRC6-AS1	-0.428843	0.637678
AC026979.3	-0.427421	0.580553
LINC01273	-0.422691	0.585888
AC118658.2	-0.421464	1.19643
LINC01468	-0.420332	0.550163
AC002116.2	-0.418829	0.982325
AC012254.3	-0.417668	0.579968
AC026790.1	-0.415038	0.800822
AL355336.1	-0.415038	0.603627
AL138767.3	-0.415038	0.60206
AL357140.2	-0.415038	0.830962
AC068580.1	-0.415038	0.558473
AL356056.2	-0.415038	0.51965
AL645504.1	-0.415038	0.631409
AL137024.1	-0.415038	0.650962
AC093864.1	-0.415038	0.60206
AC040934.1	-0.415038	0.830962
AP002812.2	-0.415038	0.60206
AC020763.1	-0.415038	0.558473
AC092127.1	-0.415038	0.607428
AC009145.1	-0.415038	0.60206
AC021087.4	-0.415038	0.558473
AL031600.3	-0.415038	0.60206
AC009407.1	-0.415038	0.513165
AC008088.1	-0.415038	0.60206
AC008752.2	-0.415038	0.60206
AC011447.3	-0.415038	0.60206
AC245884.8	-0.415038	0.689189
AC005261.1	-0.415038	0.830962
AC239803.2	-0.415038	0.989631
AC023043.4	-0.415038	0.60206
AC116447.1	-0.415038	0.60206
AC016590.3	-0.415038	0.60206
AC010331.1	-0.415038	0.798823
AC036108.4	-0.415038	0.727771
LINC00346	-0.415038	0.639114
LINC00612	-0.415038	0.60206
LINC01023	-0.415038	0.530575
LINC02562	-0.415038	1.19028
SEC24B-AS1	-0.415038	0.564614
SYNJ2-IT1	-0.415038	0.989631
ATP1A1-AS1	-0.411069	0.721713
SMG7-AS1	-0.407175	1.65234
AL445309.1	-0.40632	0.903978
AC007996.1	-0.404796	0.56104
ST3GAL5-AS1	-0.40439	0.687062
LINC00672	-0.401617	0.524173
AL139099.3	-0.400538	1.82598
AC009054.2	-0.400538	0.785178
AL513477.2	-0.400538	0.523358
KBTBD11-OT1	-0.400538	0.785178
LINC01460	-0.400538	0.785178
AL365356.5	-0.398549	0.538226
AC016994.1	-0.397336	0.634533
AC093788.1	-0.397336	0.662512
NRSN2-AS1	-0.396422	0.615902
AL353150.1	-0.395929	0.564614
AC009118.3	-0.395138	0.546403
AC008014.1	-0.394279	0.760984
AC007952.5	-0.394279	0.582038
AC009113.1	-0.392317	0.605255
AC008280.3	-0.392317	0.555902
AC025031.4	-0.39183	0.738291
LINC00339	-0.3901	0.522117
AC079866.2	-0.389947	0.605792
EXOC3-AS1	-0.389947	0.531435
AC048341.2	-0.389318	0.580533
AL359075.2	-0.389042	0.658869
AC025423.1	-0.388565	0.518304
AC104170.2	-0.387023	0.703477
AP000757.2	-0.387023	0.703477
AC078778.1	-0.387023	0.572273
AC010531.5	-0.387023	0.546299
AL121895.2	-0.387023	0.703477
FMR1-IT1	-0.387023	0.652377
PAX8-AS1	-0.386058	1.04424
AC087623.4	-0.384664	0.571049
AL139424.3	-0.384664	0.564791
ILF3-AS1	-0.384575	0.615303
AC009318.3	-0.383329	0.650195
ATP2B1-AS1	-0.38272	0.500131
LENG8-AS1	-0.382146	0.688334
AC100800.1	-0.381871	1.19884
AC083806.2	-0.380822	0.65419
AC107886.1	-0.378512	0.598739
AC010207.1	-0.378512	0.531435
AC025857.2	-0.378512	0.757104
AC016355.1	-0.378512	0.757104
LINC00954	-0.378512	0.757104
ZNF346-IT1	-0.378512	1.12511
SCAMP1-AS1	-0.377885	0.540721
KLF3-AS1	-0.374396	0.785178
KLHL7-AS1	-0.373043	0.72037
AC068580.3	-0.372752	0.648717
AL024507.2	-0.371969	0.506806
B4GALT1-AS1	-0.371969	0.800822
SLC5A4-AS1	-0.371969	0.555902
AP001258.1	-0.369757	0.640896
LINC00467	-0.369386	0.690122
TSC22D1-AS1	-0.369234	0.508275
AC091173.1	-0.367057	0.526531
AC006333.2	-0.366782	0.639359
AP001469.3	-0.365649	0.768926
AL357315.1	-0.36257	0.505268
AL390195.1	-0.36257	0.549608
AC023632.2	-0.36257	0.505268
AC004982.1	-0.36257	0.834321
AC108704.1	-0.36257	0.834321
AC004801.6	-0.36257	0.505194
AC089999.3	-0.36257	0.834321
DIAPH2-AS1	-0.36257	0.633587
IGFBP7-AS1	-0.36257	0.505268
LINC00514	-0.36257	0.562637
CCDC18-AS1	-0.361708	0.704575
AC010186.3	-0.359996	0.560869
LINC00888	-0.35826	0.590747
AP006621.3	-0.35707	0.521995
AC087269.1	-0.356144	0.631409
LINC01806	-0.356144	0.659506
AC122129.1	-0.355481	0.575879
AC046143.1	-0.352302	0.604044
AL442125.1	-0.351074	0.956121
AC025576.2	-0.347923	0.529932
AC022960.2	-0.347923	0.598739
AC005911.1	-0.347923	0.646304
AL022323.5	-0.347923	0.598739
ZNF350-AS1	-0.347923	0.989631
AC084033.3	-0.347061	0.635018
AC079322.1	-0.343954	0.508275
AC005086.1	-0.343954	0.577914
AC010761.3	-0.343302	1.39996
AC073389.1	-0.342392	0.558263
AC079684.1	-0.342392	0.500727
AL627309.5	-0.341037	1.10802
AC010531.4	-0.341037	0.539999
AC243654.3	-0.341037	0.539999
LINC00663	-0.341037	0.652377
LINC01312	-0.341037	1.27748
AC073592.1	-0.338802	0.517882
LINC01433	-0.338169	0.761549
AC005046.1	-0.337282	0.725246
AC002551.1	-0.334419	0.865521
AC025287.3	-0.334419	0.666156
FP700125.1	-0.333424	0.739787
AC024257.3	-0.331206	0.524475
AC005021.1	-0.330645	0.51418
AC022613.2	-0.329705	0.644927
AC109992.2	-0.328623	0.630341
AL031666.1	-0.325576	0.5287
AC027644.3	-0.324525	1.29387
AL136531.1	-0.321928	0.608066
AC010547.1	-0.321928	0.504687
AC027682.1	-0.321928	0.558473
AC025917.1	-0.321928	0.830962
AP000265.1	-0.321928	0.60206
AC024267.4	-0.321928	0.603627
AC092295.2	-0.321928	0.757104
AL589765.5	-0.321928	0.60206
AC136475.8	-0.321928	0.60206
DNMBP-AS1	-0.321928	0.650195
FLG-AS1	-0.321928	0.830962
LINC00092	-0.321928	0.757104
LINC01759	-0.321928	0.520438
LINC02280	-0.321928	0.609166
LINC02313	-0.321928	0.60206
RBM26-AS1	-0.321928	0.513046
WWTR1-IT1	-0.321928	0.562637
LINC00963	-0.320139	0.548577
PCBP1-AS1	-0.317572	0.597017
ZNRF3-AS1	-0.316474	1.06324
LIN37	-0.314756	0.684353
AC078778.2	-0.31366	0.564113
ZBED5-AS1	-0.313499	0.524457
ZNF213-AS1	-0.312213	0.58785
AC083843.2	-0.311944	0.596268
AC018529.2	-0.311944	0.605255
LINC00562	-0.311944	0.659506
AC005632.2	-0.311202	0.872687
AP001453.2	-0.309597	0.690965
AC084125.4	-0.308122	1.00277
AP002360.4	-0.308122	0.555902
AP005212.5	-0.308122	1.07305
B4GALT4-AS1	-0.308122	0.929274
OVCH1-AS1	-0.30715	0.519727
AGPAT4-IT1	-0.306661	0.693739
GSN-AS1	-0.306103	1.03256
LIN7A	-0.306103	1.00345
LINC01021	-0.305748	0.563726
AC002558.2	-0.304855	0.569324
AC105760.2	-0.302563	0.508275
AC106869.1	-0.302563	0.798823
AL451074.2	-0.302184	0.536449
DICER1-AS1	-0.300866	0.678174
AC009950.1	-0.29956	0.531435
FOXN3-AS2	-0.29956	0.598739
GPC6-AS1	-0.29956	0.598739
AL391294.1	-0.296982	0.512552
VIPAS39	-0.296481	0.564199
AC025766.1	-0.295456	0.520438
AC009878.1	-0.294447	0.58092
AL137127.1	-0.293446	0.82152
AL109811.1	-0.289507	0.523968
AC104986.2	-0.289507	0.505268
AC129507.2	-0.289507	0.834321
AC008537.2	-0.289507	0.608066
AF230666.2	-0.289507	0.834321
AC009549.1	-0.289507	0.505268
AL031848.2	-0.289507	0.834321
AC010271.2	-0.289507	0.505268
BRWD1-IT1	-0.289507	0.608066
GTSE1-AS1	-0.289507	0.564614
LINC01204	-0.289507	0.834321
LINC01843	-0.287577	0.804418
AL590428.1	-0.285402	0.607428
AC005702.1	-0.284453	0.526923
AC091982.4	-0.281771	0.52578
AL139022.1	-0.280108	0.608429
AC017071.1	-0.280108	0.513046
MAST4-AS1	-0.280108	0.513165
ARHGAP26-IT1	-0.275634	0.539999
AC024075.1	-0.274622	0.634533
AC009464.1	-0.271302	1.59077
C1RL-AS1	-0.270961	0.731749
SRP14-AS1	-0.269187	0.574781
AC034111.1	-0.268489	0.513046
AC120053.1	-0.267933	0.504787
DAPK1-IT1	-0.267104	0.992877
MZF1-AS1	-0.266646	0.584719
AC096540.1	-0.263034	0.60206
AL355574.1	-0.263034	0.598739
AC009812.3	-0.263034	0.514177
AC025434.1	-0.263034	0.558473
AC009269.3	-0.263034	0.508275
AC004687.1	-0.263034	0.60206
AC008737.1	-0.263034	0.558473
AC093458.1	-0.263034	0.60206
AL358394.3	-0.263034	0.60206
AL161756.3	-0.263034	0.989631
LINC00893	-0.263034	0.534955
NFIA-AS1	-0.263034	0.989631
NPSR1-AS1	-0.263034	0.702254
LINC01547	-0.258918	0.609125
AC027020.2	-0.258312	0.894171
AL365181.3	-0.255923	1.43278
AC096642.1	-0.255257	0.835585
AC009948.3	-0.254814	0.530448
AL355312.2	-0.253757	0.800822
AC018926.1	-0.253757	1.00277
AC068790.3	-0.252766	0.513046
AC010834.3	-0.252063	0.50164
AC080013.4	-0.252063	0.550354
AL512791.1	-0.251539	0.505268
AC009065.5	-0.247928	0.989631
AL450384.2	-0.245756	0.521382
AC025171.1	-0.244307	0.532263
AC026124.2	-0.243926	0.568614
AL033543.1	-0.243271	0.641262
AC027243.1	-0.241008	0.505268
AL353803.4	-0.241008	0.504946
AC004839.1	-0.241008	0.834321
SMAD1-AS2	-0.241008	0.608066
AC063965.1	-0.239188	0.6018
AC068446.2	-0.23816	1.34518
AC005229.4	-0.236298	0.605255
ADIRF-AS1	-0.235289	0.632425
AP001439.1	-0.234465	0.757104
AC055811.3	-0.234465	0.608429
AC104984.6	-0.234465	0.52868
AC009163.7	-0.234465	0.524973
SEC62-AS1	-0.234465	0.598739
AL844908.1	-0.231326	1.27748
VIM-AS1	-0.231326	0.545017
AC087623.2	-0.230006	0.583736
AL606534.1	-0.229482	0.555902
AC020978.2	-0.229482	0.555902
AC099850.3	-0.22741	0.50569
AC012358.3	-0.225881	0.684612
AC004988.1	-0.222392	0.60206
AC002401.2	-0.222392	0.60206
AC010809.1	-0.222392	0.757104
AC009054.1	-0.222392	0.513165
AL583856.2	-0.222392	0.60206
AL133492.1	-0.222392	0.60206
BVES-AS1	-0.222392	0.531435
LINC01504	-0.222392	0.603411
LINC01589	-0.222392	1.00277
ST20-AS1	-0.222392	0.650798
URB1-AS1	-0.222392	0.553343
AC007388.1	-0.219877	0.537889
AC100814.1	-0.216811	0.549608
KDM4A-AS1	-0.216492	0.528123
AC006145.1	-0.214125	0.546937
AL592114.3	-0.214125	0.703477
NDUFA6-AS1	-0.214125	0.517358
TMCC1-AS1	-0.212153	0.633591
AC098484.1	-0.211504	0.513165
AC148477.3	-0.211504	0.60206
SRGAP2-AS1	-0.211504	0.52868
LINC00540	-0.208587	1.19028
AC005899.5	-0.206451	0.834321
AC103810.5	-0.206451	0.688601
AP000365.1	-0.206451	0.505268
VCAN-AS1	-0.206451	0.505268
AC007365.1	-0.203533	0.667944
THSD4-AS1	-0.202817	1.82598
TAS2R15P	-0.200427	0.60206
AL162411.1	-0.197939	0.799567
AC016876.1	-0.195016	0.846719
AL162595.1	-0.192645	0.558473
AC099343.3	-0.192645	0.834321
AL049794.1	-0.192645	0.558473
ATP2A1-AS1	-0.192645	1.20181
Z97832.2	-0.18927	0.500727
AC002398.1	-0.188445	1.59077
AL365203.1	-0.187086	1.01511
AC019080.1	-0.186769	0.66843
JHDM1D-AS1	-0.185556	0.650195
LINS1	-0.185287	0.549388
AL355916.1	-0.184425	0.513165
AC090001.1	-0.184425	0.598739
AL355075.2	-0.182203	0.798823
LINC01572	-0.182203	0.523504
AC105206.2	-0.180572	0.830962
AC036108.3	-0.175572	0.639114
AC018645.2	-0.171271	0.887118
AC009403.1	-0.169925	0.587762
AL022322.1	-0.169925	0.830962
ATP6V0E2-AS1	-0.169925	0.855556
AC087749.2	-0.16601	0.555902
AP000350.7	-0.165059	0.590693
AC090220.1	-0.161463	0.797614
AC067852.6	-0.161281	0.701582
AC134407.1	-0.160465	0.558473
ALG13-AS1	-0.160465	0.505268
TRAPPC12-AS1	-0.160465	0.702254
AC104109.2	-0.157541	0.529932
AC006566.1	-0.152003	0.60206
AL161421.1	-0.152003	0.60206
RBPMS-AS1	-0.152003	0.598739
AL136115.1	-0.145851	0.555902
AL157838.1	-0.143492	0.83469
AL590491.2	-0.137504	0.60206
AL133330.1	-0.131912	0.67692
AC103760.1	-0.131245	0.505268
AL008721.2	-0.129635	0.717977
AC138393.3	-0.129283	0.52868
AL355483.2	-0.128324	0.703477
FOXN3-AS1	-0.128324	0.539999
AL360093.1	-0.127379	0.834321
LINC01694	-0.125531	0.60206
LINC00926	-0.121991	0.598739
AC034229.3	-0.120854	0.637678
AC016831.5	-0.120702	0.502534
AL359095.1	-0.111421	0.606485
AL355303.1	-0.110183	1.20181
AC106886.3	-0.106915	0.60206
AC129507.1	-0.0978473	0.539999
AL360270.2	-0.0939761	0.508107
AC007620.3	-0.0824622	0.60206
AC092168.2	-0.0765245	0.554414
AL121895.1	-0.0740006	0.553763
AC064801.1	-0.0740006	0.60206
AC080162.1	-0.0687128	0.505268
AC068025.2	-0.0671142	0.598739
AL078587.1	-0.0641303	0.60206
AC137630.2	-0.0588937	0.60206
LINC01913	-0.0565835	0.60206
AC007378.1	-0.0465426	0.505268
PAQR9-AS1	0.0347654	0.60206
DDN-AS1	0.0636586	0.505268
AC080023.1	0.0641303	0.558473
ASH1L-IT1	0.0703893	0.60206
AL450326.1	0.0824622	0.60206
AC007552.2	0.0840643	0.531435
AC243773.3	0.0874628	0.558473
HIF1A-AS2	0.0892673	0.598739
AC130324.1	0.0931094	0.555342
RHOA-IT1	0.0962153	0.505268
DPYD-AS2	0.0995357	0.60206
AC105243.1	0.100242	0.535095
AL513327.1	0.100402	0.570793
AC099811.1	0.111031	0.865521
AC002401.4	0.115477	0.505268
DOCK4-AS1	0.115477	0.608066
MYCBP2-AS1	0.115477	0.558473
AL132656.2	0.116918	0.587106
ATP1B3-AS1	0.117836	0.652377
EPN2-AS1	0.117836	0.517119
AC009948.5	0.118473	0.66642
LINC00857	0.118757	0.594957
AP005136.2	0.120294	0.834321
AMMECR1-IT1	0.120294	0.834321
AC245041.1	0.122065	0.654775
AP001505.2	0.123989	0.539145
AL121759.1	0.125531	0.558473
AC233992.3	0.125531	0.60206
AC004263.2	0.125531	0.757104
AC006504.8	0.130397	0.558473
AL355483.1	0.131245	0.505268
GNG12-AS1	0.131245	0.505268
ST6GAL2-IT1	0.135352	0.614837
AC090409.1	0.137504	0.60206
COL4A2-AS1	0.137504	0.60206
NAPA-AS1	0.142019	0.598739
PLCE1-AS2	0.143591	1.13057
AC103591.3	0.14439	0.505268
ALMS1-IT1	0.146289	0.640507
AC087276.3	0.148863	1.20181
AC012313.1	0.152003	0.514427
AC127522.1	0.152003	0.60206
AC091132.5	0.152003	0.69897
AC079766.1	0.152003	0.60206
AC009242.1	0.152003	0.558473
AC114980.1	0.154034	0.759693
AC027682.4	0.156119	1.27748
AC016745.2	0.156402	0.800822
AC073046.1	0.159199	0.60206
AC130650.2	0.159657	0.526344
AL355802.1	0.161751	0.798823
AL355578.1	0.163499	0.598739
AL161431.1	0.165338	0.573111
AC124319.2	0.165518	0.525413
AC026124.1	0.166972	0.624746
AC103702.2	0.167351	0.529102
AC127164.1	0.168877	0.607239
AC245595.1	0.169925	0.522534
AC091940.1	0.169925	0.60206
AC126763.1	0.169925	0.60206
AL512310.12	0.169925	0.60206
CSNK1G2-AS1	0.169925	0.558473
USP12-AS1	0.169925	0.558473
RAI1-AS1	0.171766	0.717977
AC021205.3	0.172467	0.563634
LINC00624	0.172677	0.509724
AL118506.1	0.177305	0.607608
AC012085.2	0.179324	0.757104
AL157937.1	0.179706	0.556484
AC027514.1	0.180572	0.580553
KANSL1-AS1	0.180572	1.10304
UXT-AS1	0.180572	0.834321
ZNRF3-IT1	0.180572	0.564614
AC243773.2	0.181838	0.733841
PRRT3-AS1	0.182478	2.1673
FO393401.1	0.182864	1.20181
AL121672.2	0.182864	0.764419
AL035071.2	0.184425	0.531435
AC245884.9	0.184425	0.598739
AC005089.1	0.187627	0.667944
Z98882.1	0.188833	0.504466
AC107959.2	0.189034	0.70658
AL121832.3	0.190331	0.846719
AC106782.2	0.192645	0.562308
AC016722.3	0.192645	0.598739
AC006504.1	0.192645	0.633377
AC099811.4	0.192645	0.67692
AL158163.1	0.192645	0.701582
AL161729.4	0.192645	0.60206
AC093799.2	0.192645	0.764419
AC022898.2	0.192645	0.60206
BIRC6-AS2	0.192645	0.505409
AC084125.2	0.194173	0.972947
LINC01474	0.196397	0.508107
SDCBP2-AS1	0.196692	0.728114
AC096564.1	0.197037	0.564614
AC002550.2	0.199309	0.539999
AC138028.2	0.200299	0.725411
AL162171.3	0.200465	0.852248
AL606760.1	0.201634	0.989631
AL031281.2	0.201634	0.530827
AC084036.1	0.201634	0.727771
KCNIP4-IT1	0.201634	0.757104
RBMS3-AS2	0.201634	0.531435
AC131009.3	0.202189	0.701432
AC022007.1	0.202308	0.539768
AC009065.8	0.202308	0.554414
AP001381.1	0.203533	0.800822
AL162724.1	0.20482	0.730955
AL133243.3	0.20578	0.576933
AC068389.4	0.206451	0.505268
AC092756.1	0.206451	0.513165
AC022558.2	0.206451	0.505268
AC009021.2	0.206451	0.608066
AC015849.3	0.206451	0.646168
AC096721.1	0.206451	0.505268
AC048344.4	0.206451	0.53333
AL442128.2	0.206451	0.504687
AC092902.5	0.206451	0.504687
LINC00167	0.206451	0.505268
TMEM254-AS1	0.206451	0.505268
AC245041.2	0.206585	0.672595
AL049840.3	0.207096	0.618866
AC016705.2	0.208242	0.509807
AC007666.1	0.211504	0.757104
AC008543.3	0.211504	0.531435
AC002044.1	0.211504	0.531435
AC106820.4	0.212545	0.650094
SLC16A1-AS1	0.212729	0.674675
AC092171.2	0.213707	0.711637
AC016747.3	0.213707	0.525749
AC016026.1	0.213956	0.894919
AC092171.1	0.214125	0.703477
AC010401.2	0.214302	0.663114
AC011120.1	0.215729	1.00277
AC005546.1	0.215729	0.667944
AC018754.1	0.216209	0.513323
LINC01193	0.217357	0.569324
AC090833.1	0.21818	0.759693
AC091057.3	0.218281	0.528425
AC011510.1	0.21864	1.33861
RALY-AS1	0.21864	0.67692
AC138028.4	0.218808	0.551182
AC005726.3	0.219566	0.539999
AL161891.1	0.221143	0.538052
AC006947.1	0.222392	0.989631
AC017002.3	0.222392	1.20181
AC067817.2	0.222392	0.558473
AL157871.5	0.222392	0.608066
AC099518.5	0.222392	0.60206
AC010754.1	0.222392	0.60206
AC008687.2	0.222392	0.558473
CLIP1-AS1	0.222392	0.535303
LINC00628	0.222392	0.505268
Z68871.1	0.223213	0.52335
PRMT5-AS1	0.223454	0.613528
ZBTB11-AS1	0.223454	0.565094
AP000864.1	0.223896	0.618512
CRYM-AS1	0.224123	0.618872
AFAP1-AS1	0.224631	0.884087
AC068587.6	0.224706	0.606959
ACTA2-AS1	0.224966	0.598739
AC092118.1	0.225147	0.836084
ZNF252P-AS1	0.22556	0.525465
AC005096.1	0.225881	0.845217
AP000845.1	0.225881	0.504787
LINC01176	0.22741	0.512641
AC012568.1	0.227952	0.525117
AL138955.1	0.228269	0.834321
AC093732.1	0.228819	1.07396
AC023154.1	0.229482	0.676298
AC090559.2	0.229482	1.00277
AL512506.1	0.229482	1.20181
AC109460.2	0.229868	0.781876
AC009032.1	0.230484	0.746822
AL357568.2	0.231326	0.708571
AGAP1-IT1	0.231326	0.703477
ABALON	0.23342	2.88143
AP005899.1	0.23349	0.594449
AC027228.2	0.234213	0.516501
AL121992.1	0.234465	0.757104
AC108449.2	0.234465	0.641262
AC068768.2	0.234465	0.531435
AC026356.2	0.235628	1.15
AC008915.2	0.236067	0.511404
AC083949.1	0.237039	0.554617
AC121761.1	0.237039	0.519722
AC004158.1	0.237039	0.684612
AC005072.1	0.237039	0.500919
MCPH1-AS1	0.237039	0.514177
AC115618.1	0.237692	0.513407
AC006441.1	0.237692	0.780285
AP005329.2	0.237692	0.516834
AL357033.4	0.23816	0.798823
AC111182.1	0.238657	0.56799
AC019205.2	0.239007	0.505012
AL606834.2	0.239466	0.630418
AL080317.2	0.23967	0.655925
AC008440.1	0.241008	0.505268
AP002892.2	0.241008	0.505268
AC009996.1	0.241008	0.546937
AC015922.3	0.241008	1.59077
AC087482.1	0.242201	0.648526
AC023024.1	0.24428	0.632939
AC245452.1	0.244969	0.674828
AC107959.1	0.245113	0.562318
AL133243.1	0.245113	0.520438
AP000866.6	0.245202	0.572849
CCDC183-AS1	0.246161	0.995875
AC020915.4	0.247438	0.661233
AC013476.1	0.247928	0.951884
AC087286.1	0.247928	0.531435
AC011939.2	0.247928	0.598739
RSF1-IT1	0.247928	0.531435
AL139407.1	0.248821	0.535354
AC040162.3	0.249614	0.686248
AC022400.5	0.249978	0.52726
CEBPA-AS1	0.250696	0.981949
AC007038.2	0.251132	0.62649
AC092375.2	0.251539	0.834321
TGFB2-AS1	0.252766	0.55292
AC009041.4	0.253757	0.546057
LINC02076	0.253757	0.555342
AC006141.1	0.254152	0.639107
AC073896.4	0.254573	0.760984
AC073575.1	0.255257	0.655329
AC007342.1	0.255257	0.564614
ENO1-IT1	0.255501	0.522942
AC021016.2	0.256775	0.540331
PSMD6-AS2	0.257601	0.556676
AC253536.6	0.258312	0.726374
AC021237.1	0.259867	0.530148
AP000487.1	0.26154	0.529297
AL031594.1	0.26213	0.688162
AC026401.3	0.262208	0.567722
AP000692.1	0.263034	0.60206
AC107982.2	0.263034	0.668013
AC005410.2	0.263034	0.60206
AC079336.5	0.263034	0.60206
AC026202.3	0.263034	0.60206
AC008760.1	0.263034	1.00277
AC079315.1	0.263034	0.513165
AL353804.2	0.263034	0.513165
AL121655.1	0.263034	0.60206
AL731566.2	0.263034	0.60206
C1QTNF1-AS1	0.263034	0.598739
SRP54-AS1	0.263034	0.79137
FLNB-AS1	0.263248	0.731194
AC087294.1	0.264341	0.794836
AC135050.1	0.264478	0.543541
NUTM2B-AS1	0.265016	1.0824
PPP1R26-AS1	0.265461	0.5193
AC125611.2	0.268703	0.554078
AC092368.3	0.269607	0.705306
AL022323.4	0.271027	0.590428
AL136984.1	0.271302	0.636884
Z92544.2	0.27151	0.509342
AC006435.2	0.27208	0.511745
AC135178.5	0.273018	1.00277
LINC00431	0.273018	1.00277
SCOC-AS1	0.273018	0.684612
AC115989.2	0.273761	0.58867
AC145285.2	0.274175	0.951884
AC092828.1	0.274175	1.36145
AC011595.1	0.274175	0.51137
AC011379.1	0.275634	0.60206
AC010504.1	0.275634	0.546299
SPATA3-AS1	0.275634	0.703477
AL049840.4	0.27615	0.661762
AC087286.4	0.276518	0.543972
AC097634.1	0.277534	0.535281
AC009884.1	0.278301	0.537367
AC254633.1	0.278716	0.663039
AC008738.7	0.279436	0.556382
AC090673.2	0.280108	0.513165
AL034346.1	0.280108	0.598739
AC011489.1	0.280108	0.54869
AC244093.3	0.280108	0.989631
LINC00273	0.280108	0.60206
LINC01534	0.280108	0.94764
MNX1-AS1	0.280108	0.757104
AL031775.1	0.28273	0.759426
AL021068.1	0.283793	0.609166
AC092053.2	0.283793	0.546057
LINC01137	0.284083	0.709223
AL445931.1	0.284303	0.955386
TMEM202-AS1	0.284303	0.648175
MAGI1-IT1	0.284729	0.919446
AC004067.1	0.286304	0.663562
STEAP3-AS1	0.286417	0.780955
AL135999.1	0.287282	0.616214
AP002833.1	0.287981	0.501774
AL513412.1	0.289507	0.558473
AL355613.1	0.289507	0.608066
AC002306.1	0.289507	0.505268
AC009065.1	0.289507	0.660471
AP001020.2	0.289507	0.646168
AL590822.2	0.289507	0.558473
AC253576.2	0.289507	0.505268
LINC01663	0.289507	0.505268
SLC25A25-AS1	0.29059	0.710335
AC004241.3	0.292181	0.564791
AC233701.1	0.293359	1.18765
AL022328.1	0.295456	0.585011
AC027601.1	0.295776	0.539601
AL360091.1	0.296982	0.514598
AC013549.2	0.297681	0.717977
AL136115.2	0.298341	0.562039
AC011196.1	0.29956	0.608429
AC134775.1	0.29956	0.531435
AC244517.1	0.29956	0.598739
AC007485.1	0.29956	0.757104
AC105137.3	0.29956	0.542163
ATG10-AS1	0.29956	0.757104
KCNMA1-AS1	0.29956	1.33861
LMF1-AS1	0.29956	0.757104
PLS3-AS1	0.29956	0.989631
AC008781.2	0.300659	0.60548
AC132192.2	0.301656	0.549608
[truncated: 4,337 more rows]

## Sheet: B_UpmiRNAsA549MLN
Symbol	Ctrl_8h	Ctrl_8h	0.25_8h	0.25_8h
MIR1244-1	1	0	8.7039	0
hsa-mir-550a-1	-1.73697	-1.73697	1	1.58496
MIR550A1	-1.73697	-1.73697	1	1.58496
MIR6512	-1.73697	-1.73697	0	1.58496
MIR323A	-1.73697	-1.73697	-1.73697	1.58496
MIR4451	-1.73697	-1.73697	1.58496	-1.73697
MIR342	-1.73697	-1.73697	1	0
MIR4799	-1.73697	-1.73697	0	1
MIR544A	-1.73697	-1.73697	1	0
MIR559	-1.73697	-1.73697	1	0
MIR548L	-1.73697	0	0	2.32193
MIR575	-1.73697	0	1	2
MIR6892	0	0	2.32193	2
MIR147B	0	1	0	3.45943
MIR3164	-1.73697	0	1.58496	1
MIRLET7A1	-1.73697	0	2	0
hsa-mir-3130-1	-1.73697	-1.73697	-1.73697	1
MIR107	-1.73697	-1.73697	-1.73697	1
MIR1266	-1.73697	-1.73697	1	-1.73697
MIR185	-1.73697	-1.73697	-1.73697	1
MIR205HG	-1.73697	-1.73697	-1.73697	1
MIR212	-1.73697	-1.73697	-1.73697	1
MIR3130-1	-1.73697	-1.73697	-1.73697	1
MIR339	-1.73697	-1.73697	-1.73697	1
MIR33A	-1.73697	-1.73697	-1.73697	1
MIR3649	-1.73697	-1.73697	1	-1.73697
MIR3689B	-1.73697	-1.73697	1	-1.73697
MIR411	-1.73697	-1.73697	1	-1.73697
MIR4515	-1.73697	-1.73697	-1.73697	1
MIR4689	-1.73697	-1.73697	1	-1.73697
MIR4777	-1.73697	-1.73697	-1.73697	1
MIR4783	-1.73697	-1.73697	-1.73697	1
MIR5003	-1.73697	-1.73697	-1.73697	1
MIR6070	-1.73697	-1.73697	1	-1.73697
MIR6829	-1.73697	-1.73697	1	-1.73697
MIR3651	2.58496	4.64386	5.97728	5.49185
MIR1273F	0	-1.73697	-1.73697	2
MIR6839	0	-1.73697	-1.73697	2
MIR128-1	-1.73697	0	1	1
MIR3178	-1.73697	0	1	1
MIR3679	0	-1.73697	1	1
MIR3688-1	-1.73697	0	1	1
MIR3688-2	-1.73697	0	1	1
MIR4265	-1.73697	0	1	1
MIR4474	-1.73697	0	1	1
MIR4655	0	-1.73697	1	1
MIR5583-1	-1.73697	0	1	1
MIR6773	-1.73697	0	0	1.58496
MIR6806	-1.73697	0	1	1
MIR6865	-1.73697	0	1	1

## Sheet: B_UplncRNAsA549MLN
Symbol	Ctrl_8h	Ctrl_8h	0.25_8h	0.25_8h
BLOC1S5-TXNDC5	-1.73697	-1.73697	-1.73697	12.3163
KBTBD11-OT1	-1.73697	-1.73697	8.21432	-1.73697
LINC01123	-1.73697	-1.73697	-1.73697	8.18982
AC159540.2	-1.73697	-1.73697	4.9542	7.07682
CU638689.5	-1.73697	-1.73697	6.56986	-1.73697
AC020978.6	-1.73697	1.58496	6.65821	6.74147
AL355312.3	-1.73697	-1.73697	4.58496	-1.73697
AC073863.1	-1.73697	-1.73697	3.16993	3.90689
AL390198.1	-1.73697	-1.73697	-1.73697	4.45943
AC113189.4	-1.73697	-1.73697	4.39232	-1.73697
LINC00319	-1.73697	-1.73697	-1.73697	4.39232
AC005899.3	-1.73697	-1.73697	3.80735	2.80735
AC010776.1	-1.73697	-1.73697	3.70044	2.58496
FP700111.1	-1.73697	-1.73697	-1.73697	4.16993
AC005234.1	-1.73697	-1.73697	3.45943	2.80735
AC012321.1	0	0	4.58496	5.08746
AL359636.1	-1.73697	-1.73697	-1.73697	4.08746
AL121790.1	-1.73697	-1.73697	3	3.16993
AC005609.5	-1.73697	-1.73697	3	3.16993
BX088651.2	-1.73697	-1.73697	-1.73697	4
AC112722.1	-1.73697	-1.73697	1	3.80735
AL355001.1	-1.73697	-1.73697	2.80735	3
AL035658.1	-1.73697	-1.73697	3.32193	2.32193
AC107896.1	-1.73697	-1.73697	2.32193	3
IL20RB-AS1	-1.73697	-1.73697	2.80735	2.58496
AC008738.2	-1.73697	-1.73697	1.58496	3.16993
AC006064.4	0	0	5.2854	0
PTENP1-AS	-1.73697	-1.73697	1	3.32193
ZSWIM8-AS1	-1.73697	1.58496	-1.73697	6
AP001625.2	-1.73697	-1.73697	-1.73697	3.45943
AC091132.6	-1.73697	-1.73697	-1.73697	3.45943
AL121957.1	-1.73697	-1.73697	2.80735	2
AP001107.8	-1.73697	-1.73697	3	1.58496
AC026333.3	-1.73697	-1.73697	1.58496	3
AC009802.1	-1.73697	-1.73697	2	2.80735
LINC00106	-1.73697	-1.73697	2.32193	2.58496
AC015845.2	-1.73697	-1.73697	-1.73697	3.32193
AC004830.1	-1.73697	-1.73697	2.80735	1.58496
AC072022.2	-1.73697	-1.73697	1.58496	2.80735
AC103923.1	-1.73697	-1.73697	2	2.58496
AL096701.3	-1.73697	-1.73697	2	2.58496
AC008443.5	-1.73697	-1.73697	2	2.58496
AL132639.3	-1.73697	-1.73697	2	2.58496
AC022167.3	-1.73697	-1.73697	1.58496	2.80735
RAPGEF4-AS1	-1.73697	-1.73697	2	2.58496
AC037487.4	-1.73697	-1.73697	-1.73697	3.16993
AL158835.2	-1.73697	-1.73697	2	2.32193
AP002784.1	-1.73697	-1.73697	2.32193	2
AC009065.2	-1.73697	-1.73697	2.58496	1.58496
AC009097.1	-1.73697	-1.73697	2.58496	1.58496

## Sheet: B_DownmiRNAsPC9GR
Gene ID	PC9_R1	PC9_R2	PC9_R3	PC9GR_R1	PC9GR_R2	PC9GR_R3
MIR4477B	1.43007	2.03466	2.44916	-6.96578	-6.96578	-0.556948
MIR200C	1.68246	2.87201	0.701549	-6.96578	-6.96578	-0.304561
MIR4442	-0.296171	0.723462	2.30789	-6.96578	-6.96578	-0.283187
MIR6081	-6.96578	-0.810362	1.77406	-6.96578	-0.814693	-6.96578
MIR6772	0.769918	0.789551	1.37397	-6.96578	-6.96578	-0.217098
MIR5194	-1.13697	0.467623	-0.117878	-6.96578	-1.12167	-6.96578
MIR6512	-6.96578	1.84469	2.10719	0.579345	-6.96578	-6.96578
MIR5581	2.86303	2.46762	0.882122	-0.060759	-6.96578	0.876011
MIR200A	4.08542	3.88266	3.9976	2.16163	0.878329	2.46097
MIR4672	0.430068	-0.550299	-0.550838	-6.96578	-6.96578	-0.556948
MIR181B2	0.879147	-0.686182	-6.96578	-6.96578	-0.690514	-6.96578
MIR429	4.64281	4.62397	4.27195	3.05605	2.73211	2.40786
MIR23B	2.97736	3.09653	3.94399	1.24622	1.99266	1.76795
MIR29B2CHG	0.682192	0.780299	1.22835	-0.436375	-0.843347	-1.15461
MIR1249	-6.96578	1.33012	-6.96578	-6.96578	-6.96578	-0.261492
MIR3657	0.484516	-6.96578	-6.96578	-6.96578	-1.08515	-6.96578
MIR3125	-6.96578	-0.495851	0.50361	-0.439271	-6.96578	-6.96578
MIR6740	-6.96578	-6.96578	0.553796	-0.974047	-6.96578	-6.96578
MIR1301	-0.587634	-6.96578	0.43146	-0.51142	-6.96578	-6.96578
MIR548AC	0.310487	-0.66988	-6.96578	-0.6133	-6.96578	-6.96578
MIR645	0.21533	-0.765038	-6.96578	-0.708457	-6.96578	-6.96578
MIRLET7BHG	1.10628	0.844894	0.963408	-0.194741	-0.394815	-1.14633
MIR200B	3.78503	3.02705	3.67859	1.86124	2.21536	2.0204
MIR339	-0.78467	0.234962	1.55635	-0.708457	-0.769369	-0.771687
MIR219A1	-1.01144	0.593154	-0.992348	-6.96578	-0.99614	-0.998458
MIR331	1.21533	2.23496	2.55635	0.876505	1.81559	-6.96578
MIR4737	0.430068	1.03466	0.449162	-0.493718	-0.55463	-0.556948
MIR4500HG	-1.90648	-1.97996	-2.08003	-2.66034	-3.89118	-3.08614
MIR1180	1.24636	2.48838	-0.319512	0.737607	1.26166	-6.96578
MIR203A	-6.96578	-0.991809	-0.992348	-6.96578	-6.96578	-0.998458
MIR320C1	-6.96578	-0.66988	-0.670419	-6.96578	-6.96578	-0.67653
MIR17HG	-1.29948	-1.0734	-1.33697	-2.92371	-2.52519	-1.59462
MIR6784	-6.96578	-0.276538	-0.277077	-6.96578	-0.28087	-6.96578
MIR3613	-6.96578	-0.653392	-0.653931	-6.96578	-0.657724	-6.96578
MIR602	-0.844791	-6.96578	-0.825698	-6.96578	-6.96578	-0.831808
MIR3605	-0.873938	-6.96578	-0.854844	-6.96578	-6.96578	-0.860954
MIR5587	2.84935	2.38356	2.64605	1.70317	2.37923	0.0549814
MIR106B	1.41237	1.01696	1.01642	0.48858	0.427668	-0.57465
MIR8068	-6.96578	-0.297912	-0.298451	-0.241331	-6.96578	-6.96578
MIR31HG	2.3581	2.35698	2.1059	1.47496	1.49205	1.24181
MIR1285-1	1.3776	1.71916	1.39669	1.03878	0.392902	0.390584
MIR3685	3.81572	4.22767	4.53526	3.35137	3.83102	2.82871
MIR22HG	3.35778	3.2171	3.04914	2.50181	2.27464	2.40883
MIR4453HG	0.126062	-0.0607559	-0.369417	-1.11965	-0.765527	-0.813649
MIR27B	4.17001	3.51157	3.64853	3.05357	3.0922	2.88343
MIR3176	2.27807	2.61963	3.20405	1.67621	1.61529	2.46097
MIR4664	5.17476	5.06607	4.76855	4.15582	4.22044	4.33359
MIR9-3HG	2.4569	2.52122	2.44809	1.45401	1.67272	1.93915
MIR3192	1.50313	0.522765	-0.477774	0.579345	-6.96578	0.516115
MIR4786	3.14843	2.46762	1.05205	-0.475796	1.78522	2.46097

## Sheet: B_DownlncRNAsPC9GR
Gene ID	PC9_R1	PC9_R2	PC9_R3	PC9GR_R1	PC9GR_R2	PC9GR_R3
TP73-AS1	0.0938863	0.17364	-0.131753	-6.96945	-8.96578	-7.03268
AC025154.2	-0.850301	-0.245706	-0.58328	-4.77409	-8.96578	-8.96578
BX255925.1	0.30581	0.392557	1.06187	-4.01029	-8.96578	-5.07352
AC006058.1	1.83804	1.62729	1.29588	-4.13886	-3.71434	-4.20209
AC111149.2	0.0676302	0.267835	-0.235204	-3.76305	-8.96578	-8.96578
LINC00944	-1.38529	-1.74417	-1.15974	-5.00952	-8.96578	-8.96578
AC020928.1	-1.20163	-0.766955	-1.76749	-8.96578	-8.96578	-4.7736
AC008703.1	-0.967867	-0.707226	-1.60085	-8.96578	-4.412	-8.96578
AC004990.1	2.54039	2.67324	2.4746	-2.15011	-2.79598	-2.21334
LINC01559	2.58274	2.47744	2.02019	-3.51764	-2.35616	-1.9179
LINC02582	1.43845	1.90469	0.681755	-3.30552	-3.78147	-3.04682
LINC00589	-2.24828	-2.90672	-1.64423	-8.96578	-5.23298	-8.96578
AC120049.1	-3.65705	-1.41502	-2.41556	-8.96578	-8.96578	-5.22902
LINC00943	-3.83482	-2.96719	-2.81573	-6.08053	-8.96578	-8.96578
LINC02234	-1.11795	-1.90568	-0.736291	-8.96578	-8.96578	-3.91233
AC121764.1	-1.04514	-1.34744	-0.0260508	-8.96578	-8.96578	-3.35409
AC090502.1	-3.42361	-3.81901	-1.81955	-5.34739	-8.96578	-8.96578
LINC01474	-0.964791	-0.945158	-0.945697	-8.96578	-8.96578	-3.53677
LINC02387	-2.40667	-1.972	-0.650611	-8.96578	-3.97633	-8.96578
LINC02159	-4.41186	-2.07029	-3.39276	-8.96578	-8.96578	-5.39887
AL354719.2	-1.92854	-2.1313	-3.13184	-8.96578	-8.96578	-4.72291
MSC-AS1	-4.26259	-5.24295	-4.0211	-6.77134	-8.96578	-8.96578
LINC00504	-2.22302	-2.82488	-2.82541	-6.46873	-5.52965	-8.96578
AC024940.1	-3.79423	-4.7746	-1.19017	-4.71802	-8.96578	-8.96578
AC008840.1	-2.05822	-2.45362	-1.03912	-3.982	-8.96578	-8.96578
AADACL2-AS1	-3.54069	-0.713707	-1.19967	-8.96578	-8.96578	-3.52771
AC080037.1	-2.02612	-2.00649	-1.6851	-8.96578	-8.96578	-4.01314
AC079336.5	-2.69885	-3.16465	-5.48711	-8.96578	-8.96578	-5.49322
AC011294.1	-4.09169	-2.19758	-2.19812	-8.96578	-8.96578	-4.66366
AL160313.1	-4.25106	-1.42407	-1.91004	-4.17485	-8.96578	-8.96578
AC010735.1	-2.2329	-2.21326	-1.89187	-4.15668	-8.96578	-8.96578
LINC02101	-2.14696	-2.71229	-0.90547	-8.96578	-8.96578	-3.71894
AP000688.1	-4.56659	-1.54696	-2.96253	-4.49037	-8.96578	-8.96578
AC012447.1	-3.64371	-1.30215	-1.03965	-3.5675	-8.96578	-8.96578
RP11-539I5.2	-1.82081	-1.37234	-0.694804	-4.44504	-4.50595	-5.50827
AC012254.3	-3.27789	-2.93633	-3.67383	-5.20167	-8.96578	-8.96578
AC083967.1	-1.23851	-2.21888	-0.897488	-8.96578	-8.96578	-3.22553
LINC01942	-0.910969	-2.21326	-1.2138	-8.96578	-8.96578	-3.21991
WNT5A-AS1	2.16169	1.68175	1.68121	-0.53469	-8.96578	-1.59792
TCEAL3-AS1	-0.725937	-1.7063	-0.384915	-2.64972	-8.96578	-8.96578
AC090833.1	-3.79232	-2.18773	-3.77323	-8.96578	-8.96578	-4.77934
LINC01121	-1.28816	-1.57887	-1.52282	-4.16614	-6.22706	-4.64441
AC008083.2	-0.41708	0.702088	0.964584	-3.14822	-3.20913	-2.21145
AL121790.2	1.57262	1.12659	1.94318	-3.20915	-2.27006	-0.687418
AC093227.1	-0.832118	-0.9194	-0.228061	-3.56326	-4.62417	-3.62649
AL356234.2	-0.680743	-0.480538	-0.661649	-4.51142	-4.57233	-2.98969
SMIM15-AS1	-1.54478	-2.26211	-0.388181	-3.79049	-8.96578	-3.85372
LINC01605	-0.894944	-1.61228	-1.0823	-3.72562	-4.78653	-4.78885
AC104411.1	-8.96578	-0.532377	-0.210988	-8.96578	-2.53671	-8.96578
AC004466.1	-4.3069	-1.96534	-2.70284	-8.96578	-4.2916	-8.96578

## Sheet: C_Correlation
Conditions	log(ncRNA)	log(FT_stemness_EMT)
0.25 μM 8h 1	-0.455539	1.93769
0.25 μM 8h 2	-0.403251	2.0172
0.5 μM 8h 1	-0.403251	1.89572
0.5 μM 8h 2	-0.446735	1.93191
0.25 μM 24h 1	0.088117	1.96305
0.25 μM 24h 2	-0.0116576	1.98886
0.5 μM 24h 1	-0.0495622	2.06061
0.5 μM 24h 2	0.0922047	2.10277
