# Supplementary material for: ncRNAs Orchestrate Chemosensitivity Induction by Neddylation Blockades
Source: Cancers (Basel). 2024 Feb 18;16(4):825. doi: 10.3390/cancers16040825 (PMC10886669; doi:10.3390/cancers16040825)
Supplement: Supplementary file 1 [file cancers-16-00825-s001.zip › Source Data S3.xlsx]

## Sheet: A_HM
Gene ID	PC9Control_R1	PC9Control_R2	PC9Control_R3	PC9GR_R1	PC9GR_R2	PC9GR_R3	PC9Control_R1	PC9Control_R2	PC9Control_R3	PC9GR_R1	PC9GR_R2	PC9GR_R3
ZEB2	0.00655573	0.0011	0.00442872	0.0460758	0.0441709	0.04851	-7.25303	-9.82828	-7.8189	-4.43985	-4.50076	-4.36557
TWIST2	3.3704	3.32822	3.29753	5.20732	5.25632	4.83744	1.75292	1.73475	1.72139	2.38054	2.39405	2.27424
SNAI2	0.272333	0.376451	0.928232	1.98364	1.17601	1.44892	-1.87656	-1.40947	-0.107443	0.988151	0.2339	0.534974
SOX2	0.13028	0.154076	0.198023	0.114456	0.0877793	0.328644	-2.94031	-2.69829	-2.33626	-3.12714	-3.50998	-1.6054
KLF2	0.730064	0.630428	0.849389	0.855187	0.819832	0.927651	-0.453905	-0.665597	-0.235502	-0.225688	-0.2866	-0.108346
POU5F1	0.320309	0.362897	0.152742	0.178774	0.152341	0.171108	-1.64246	-1.46237	-2.71083	-2.48379	-2.71463	-2.54702
ALDH1A2	0.151887	0.134722	0.10902	0.160127	0.23026	0.15326	-2.71893	-2.89194	-3.19733	-2.64271	-2.11866	-2.70594
NANOG	0.0202357	0	0	0	0	0.0204186	-5.62695	#NUM!	#NUM!	#NUM!	#NUM!	-5.61397
FGFR2	0.00720052	0.00729918	0.0011	0.0151823	0.0072773	0.0145312	-7.11768	-7.09805	-9.82828	-6.04147	-7.10238	-6.1047
VIM	0.0011	0.0011	0.0011	0.0892215	0.0534581	0.117419	-9.82828	-9.82828	-9.82828	-3.48646	-4.22545	-3.09026
CD44	46.2969	43.8457	54.2754	65.1903	72.2668	78.5835	5.53284	5.45436	5.76223	6.02659	6.17526	6.29615
CDH2	0.970054	0.89395	1.10585	2.2894	2.39529	2.04663	-0.0438628	-0.161734	0.145156	1.19497	1.2602	1.03325
KLF4	4.14573	4.47464	9.15749	28.1575	20.3167	16.8983	2.05163	2.16177	3.19495	4.81545	4.34459	4.07881
CDH1	44.2037	41.0394	46.7977	44.0033	45.2017	45.4144	5.46609	5.35894	5.54836	5.45954	5.49831	5.50508

## Sheet: C_VP-A549
gene_name	log2FC	-log10pval
FKBP9P1	-10.2742	0.766368
FP565260.2	-9.26952	0.60206
Z97353.1	-8.99105	0.60206
ZBTB9	-8.80843	1.36046
MGC4859	-8.67353	1.12124
ISY1-RAB43	-8.59681	0.60206
TUBA4B	-7.88976	0.60206
ST13P19	-7.21755	0.60206
AC011511.4	-7.15144	0.60206
PRICKLE2-AS1	-7.11201	1.37424
ARL2-SNX15	-7.08215	0.60206
RPL23AP63	-7.02791	0.60206
AC009220.1	-6.7879	0.60206
AC067968.1	-6.67478	0.60206
AL513165.2	-6.60239	0.60206
AC008870.1	-6.52617	0.60206
AC024267.6	-6.49985	0.60206
AC120114.5	-6.30073	0.60206
MINOS1-NBL1	-6.13955	0.60206
AC010655.3	-6.12928	1.81346
FMO1	-6.12928	0.659834
AL512844.2	-6.10504	0.60206
NICN1	-5.92139	1.13908
SMURF2P1	-5.8371	0.60206
PLCG2	-5.81644	0.600711
NPIPB8	-5.65821	0.60206
AL354798.1	-5.5597	0.60206
CU459211.1	-5.5597	0.60206
LINC01189	-5.54432	1.16355
UGT1A10	-5.50779	0.60206
AK8	-5.43741	0.747313
TEX35	-5.38082	1.05095
AL355512.1	-5.26053	1.01587
CYP1A1	-5.1964	1.52779
LINC01781	-5.1964	0.856531
GGTLC1	-5.14975	0.60206
AC023043.1	-5.05889	1.18894
PSMA6P2	-5.03826	0.594596
INO80B-WBP1	-5.00749	0.60206
AC105391.1	-5.00749	0.60206
AC008764.7	-4.98489	1.28865
FGF7P6	-4.98489	0.83922
AP003419.2	-4.96033	0.610488
AP000924.1	-4.90689	0.862724
GAPDHP72	-4.89372	1.29346
FAM86B2	-4.84967	0.60206
RFX3-AS1	-4.82443	1.23965
CSF2	-4.82443	1.23965
AC009171.2	-4.82443	0.891393
AL627389.1	-4.73697	1.38606
AC068533.3	-4.73697	1.38606
AL157392.5	-4.67243	0.60206
AGAP7P	-4.67243	0.60206
LINC00964	-4.64386	1.65621
SUB1P4	-4.64386	1.65621
AC007389.4	-4.64386	1.18456
CT62	-4.54432	1.32642
AC007314.1	-4.54432	1.32642
AL136309.2	-4.54432	1.32642
LMO1	-4.54432	1.03462
AL163953.1	-4.54432	0.766189
KRT222	-4.47079	0.667991
ABHD17AP6	-4.47032	0.60206
AL355310.1	-4.47032	0.60206
SEPT7P3	-4.47032	0.60206
AL590705.1	-4.43741	1.59151
CDKN1C	-4.43741	0.913629
AL022328.4	-4.43741	0.913629
AC068946.1	-4.35755	0.60206
TMLHE-AS1	-4.35755	0.60206
AC240565.2	-4.35755	0.60206
AC009509.1	-4.35755	0.60206
AC090844.2	-4.35755	0.60206
Z82206.1	-4.35755	0.60206
AC079385.3	-4.32193	1.25742
CD79A	-4.32193	0.968933
KRT18P12	-4.27302	0.629249
MTRNR2L6	-4.26534	0.63691
AC018555.1	-4.23522	0.60206
AC244205.2	-4.23522	0.60206
LINC01297	-4.23522	0.60206
AL512656.1	-4.23522	0.60206
AC005280.1	-4.1964	1.51552
HGF	-4.1964	1.51552
CD8A	-4.1964	1.51552
RPS23P6	-4.1964	1.51552
DPP3P1	-4.1964	1.51552
CD200R1	-4.1964	1.51552
DRAIC	-4.1964	1.04869
AC104407.1	-4.1964	1.04869
TSPAN8	-4.1964	1.04869
AL161793.1	-4.1964	1.04869
AP000640.1	-4.1964	1.04869
AL391832.3	-4.1964	1.04869
LGI4	-4.1964	1.04869
AP001187.1	-4.1964	0.845731
PTX3	-4.1964	0.845731
MADCAM1	-4.1964	0.724515
AL355315.1	-4.10154	0.60206
AC211429.1	-4.10154	0.60206
PPP1R12BP1	-4.10154	0.60206
CD209	-4.05889	1.17568
AC007619.1	-4.05889	1.17568
ENPEP	-4.05889	1.17568
SLC17A4	-4.05889	0.892577
ZNF20	-4.05889	0.892577
AJ003147.2	-4.05889	0.892577
TGIF2-C20orf24	-4.01381	0.791507
AC009480.1	-3.9542	0.60206
AC243972.1	-3.9542	0.60206
AC107214.1	-3.9542	0.60206
SRP68P3	-3.9542	0.60206
AL359273.1	-3.9542	0.60206
TVP23C-CDRT4	-3.92157	0.736605
AL078604.2	-3.90689	1.42347
AL353593.2	-3.90689	1.42347
AC022034.2	-3.90689	1.42347
FAM57B	-3.90689	1.42347
AC016629.3	-3.90689	1.42347
AL034369.1	-3.90689	1.42347
AL354977.2	-3.90689	1.42347
AC079790.1	-3.90689	1.42347
PHEX-AS1	-3.90689	1.42347
IL23A	-3.90689	1.42347
SPATA45	-3.90689	0.961825
KIAA1614-AS1	-3.90689	0.961825
CCL5	-3.90689	0.961825
LARS2-AS1	-3.90689	0.961825
OR2B6	-3.90689	0.767248
CLEC18B	-3.90689	0.767248
AC135048.1	-3.86942	2.43894
AL121601.1	-3.79008	0.60206
NUTM2HP	-3.79008	0.60206
AC034243.1	-3.79008	0.60206
AC138649.1	-3.79008	0.60206
GRTP1-AS1	-3.79008	0.60206
AC010615.1	-3.79008	0.60206
AC008610.1	-3.79008	0.60206
AL049569.1	-3.79008	0.60206
AC005586.1	-3.73697	1.07561
AC004540.1	-3.73697	1.07561
ADA2	-3.73697	1.07561
LINC02170	-3.73697	1.07561
CXCL17	-3.73697	1.07561
AL391069.3	-3.73697	1.07561
PABPN1L	-3.73697	1.07561
AL392183.1	-3.73697	1.07561
DACT3-AS1	-3.73697	1.07561
AC011466.1	-3.73697	1.07561
EXOC3L1	-3.73697	0.802061
MMP19	-3.73697	0.802061
AL035420.2	-3.73697	0.802061
ALDH1A2	-3.73697	0.663813
AC009127.3	-3.60486	0.60206
HOXD1	-3.60486	0.60206
AC234917.1	-3.60486	0.60206
RPL7P58	-3.60486	0.60206
JPH4	-3.60486	0.60206
SEMA3B-AS1	-3.60486	0.60206
HSPA8P11	-3.60486	0.60206
GJB7	-3.60486	0.60206
AC079354.3	-3.60486	0.60206
CLDN19	-3.60486	0.60206
AL109767.1	-3.60486	0.60206
AL133227.1	-3.60486	0.60206
MPL	-3.60486	0.60206
SLC2A9	-3.54432	1.30683
ELAVL3	-3.54432	1.30683
IPCEF1	-3.54432	1.30683
LINC00634	-3.54432	1.30683
TAS1R1	-3.54432	1.30683
AC005387.2	-3.54432	1.30683
KRT12	-3.54432	1.30683
AL603832.2	-3.54432	1.30683
KCNE3	-3.54432	1.30683
LINC01510	-3.54432	1.30683
MTND5P2	-3.54432	1.30683
DDC-AS1	-3.54432	1.30683
C20orf173	-3.54432	1.30683
NEU4	-3.54432	1.30683
AC040896.1	-3.54432	1.30683
TTLL11-IT1	-3.54432	1.30683
AL589986.2	-3.54432	1.30683
TSPO2	-3.54432	1.30683
LINC01182	-3.54432	1.30683
AC010894.2	-3.54432	1.30683
AC084782.1	-3.54432	1.30683
AC021739.5	-3.54432	0.855342
U62317.2	-3.54432	0.855342
PSD2-AS1	-3.54432	0.855342
AC098679.1	-3.54432	0.675503
TUBB2B	-3.50573	1.62093
GUSBP9	-3.45403	1.55725
C5orf24	-3.44336	1.2456
F7	-3.39232	0.60206
AC008763.1	-3.39232	0.60206
AC006237.1	-3.39232	0.60206
AC006159.2	-3.39232	0.60206
FAM66D	-3.39232	0.60206
ZNF300P1	-3.39232	0.60206
DPH6-AS1	-3.39232	0.60206
RPL7P42	-3.39232	0.60206
C10orf107	-3.39232	0.60206
PIFO	-3.39232	0.60206
AC021086.1	-3.39232	0.60206
AC005261.3	-3.39232	0.60206
AC078785.1	-3.39232	0.60206
NAT8	-3.39232	0.60206
RNU6-1200P	-3.39232	0.60206
MICC	-3.39232	0.60206
AC035140.1	-3.39232	0.60206
C7orf61	-3.39232	0.60206
FER1L6	-3.39232	0.60206
AC012005.2	-3.39232	0.60206
AC006328.2	-3.39232	0.60206
ENO1-AS1	-3.39232	0.60206
LINC00539	-3.39232	0.60206
KLK10	-3.39232	0.60206
AC022075.1	-3.39232	0.60206
AC006378.1	-3.39232	0.60206
AL670729.3	-3.39232	0.60206
AL449212.1	-3.39232	0.60206
AC069257.1	-3.39232	0.60206
SNRPGP14	-3.39232	0.60206
AC069257.3	-3.39232	0.60206
AL050320.1	-3.39232	0.60206
AC009518.2	-3.39232	0.60206
ALG1L13P	-3.39232	0.60206
FRMPD2	-3.39232	0.60206
CIART	-3.39232	0.60206
AC090952.2	-3.39232	0.60206
S100A5	-3.39232	0.60206
AC100827.5	-3.32193	0.947282
AC105384.2	-3.32193	0.947282
SNORA31	-3.32193	0.947282
MTCO2P30	-3.32193	0.947282
BX255925.1	-3.32193	0.947282
OR1N1	-3.32193	0.947282
AC007786.2	-3.32193	0.947282
ZNF681	-3.32193	0.947282
AL355310.2	-3.32193	0.947282
LINC01358	-3.32193	0.947282
DUX4L51	-3.32193	0.947282
AL121990.1	-3.32193	0.947282
AC008073.3	-3.32193	0.692636
IHH	-3.32193	0.692636
AP002990.1	-3.31431	0.582433
Z69720.1	-3.2578	0.628728
AP003068.1	-3.22239	1.0062
UTAT33	-3.21759	1.31502
TUBA3FP	-3.14359	0.637185
LINC02410	-3.14296	0.60206
AC005154.5	-3.14296	0.60206
SERPINA1	-3.14296	0.60206
ZNF492	-3.14296	0.60206
VPREB3	-3.14296	0.60206
AC090579.1	-3.14296	0.60206
CERS6-AS1	-3.14296	0.60206
TG	-3.14296	0.60206
PRR36	-3.14296	0.60206
VWA5A	-3.14296	0.60206
AC145422.1	-3.14296	0.60206
CXorf58	-3.14296	0.60206
AMPH	-3.14296	0.60206
SLC6A14	-3.14296	0.60206
AL139254.2	-3.14296	0.60206
AP003031.2	-3.14296	0.60206
KIF28P	-3.14296	0.60206
KCNA2	-3.14296	0.60206
AC026401.1	-3.14296	0.60206
NBPF4	-3.14296	0.60206
RHOXF2	-3.14296	0.60206
AL390726.4	-3.14296	0.60206
CFAP99	-3.14296	0.60206
LINC00444	-3.14296	0.60206
FAR2P3	-3.14296	0.60206
AC133785.1	-3.14296	0.60206
ZNF665	-3.14296	0.60206
IAPP	-3.14296	0.60206
AC022113.1	-3.14296	0.60206
AL008723.1	-3.14296	0.60206
AP000866.5	-3.14296	0.60206
SUCLA2-AS1	-3.14296	0.60206
AL596220.1	-3.14296	0.60206
LINC01786	-3.14296	0.60206
AC083843.1	-3.14296	0.60206
Z99758.1	-3.14296	0.60206
Z95624.1	-3.14296	0.60206
AC073343.2	-3.14296	0.60206
FAM9B	-3.14296	0.60206
Z82173.1	-3.14296	0.60206
AC010608.1	-3.14296	0.60206
C1orf143	-3.14296	0.60206
DUSP15	-3.14296	0.60206
AC023632.1	-3.14296	0.60206
SLC14A1	-3.14296	0.60206
ZSCAN5C	-3.14296	0.60206
AL513174.1	-3.14296	0.60206
GYG2P1	-3.14296	0.60206
ABI3	-3.14296	0.60206
SKOR1	-3.14296	0.60206
CASK-AS1	-3.14296	0.60206
HCG20	-3.14296	0.60206
SH3GL2	-3.14296	0.60206
FABP6	-3.14296	0.60206
AC123768.1	-3.14296	0.60206
AL592429.1	-3.14296	0.60206
ZNF888	-3.14296	0.60206
AL031320.2	-3.06609	0.748868
AHCYP8	-3.05889	1.14792
ATP1A4	-3.05889	1.14792
AL035416.1	-3.05889	1.14792
AC008883.2	-3.05889	1.14792
NUGGC	-3.05889	1.14792
RNU6-1095P	-3.05889	1.14792
AC034229.2	-3.05889	1.14792
AC112496.1	-3.05889	1.14792
ENPP7P5	-3.05889	1.14792
RNF11P2	-3.05889	1.14792
OR13D1	-3.05889	1.14792
AC093915.1	-3.05889	1.14792
FZD10-AS1	-3.05889	1.14792
AC053503.1	-3.05889	1.14792
MIR580	-3.05889	1.14792
AL445649.1	-3.05889	1.14792
VENTXP3	-3.05889	1.14792
Six3os1_4	-3.05889	1.14792
AL031008.1	-3.05889	1.14792
USH1G	-3.05889	1.14792
EHD4-AS1	-3.05889	1.14792
AP001065.3	-3.05889	1.14792
SNORD114-29	-3.05889	1.14792
MTCO3P43	-3.05889	1.14792
ANO7L1	-3.05889	1.14792
STEAP4	-3.05889	1.14792
AC025524.2	-3.05889	1.14792
AC069148.1	-3.05889	1.14792
AL357033.1	-3.05889	1.14792
RPS23P7	-3.05889	1.14792
ZNF737	-3.05889	1.14792
GPR158	-3.05889	1.14792
SIRPB2	-3.05889	1.14792
AC011840.5	-3.05889	1.14792
AC013553.3	-3.05889	1.14792
AL365271.1	-3.05889	1.14792
AC011416.4	-3.05889	1.14792
AC121493.1	-3.05889	1.14792
AC009088.3	-3.05889	1.14792
MTRNR2L13	-3.05889	0.720145
RNU6-188P	-3.05889	0.720145
CNBD2	-3	1.12271
AC125611.4	-2.99457	0.625556
AC012615.4	-2.97797	1.88491
RGL3	-2.97797	0.714545
AC012651.1	-2.96829	0.685848
C15orf38-AP3S2	-2.94632	1.11656
AP003354.1	-2.94342	0.875338
RHAG	-2.8413	0.60206
AL359962.1	-2.8413	0.60206
PLCH1-AS2	-2.8413	0.60206
LINC00427	-2.8413	0.60206
AC114814.3	-2.8413	0.60206
DAP3P1	-2.8413	0.60206
RAI2	-2.8413	0.60206
TECTA	-2.8413	0.60206
EPX	-2.8413	0.60206
AC010205.1	-2.8413	0.60206
TMEM246-AS1	-2.8413	0.60206
TMTC1	-2.8413	0.60206
AC067945.3	-2.8413	0.60206
GBP7	-2.8413	0.60206
CDKL4	-2.8413	0.60206
U3	-2.8413	0.60206
AC093278.1	-2.8413	0.60206
AC145285.3	-2.8413	0.60206
DEFB108B	-2.8413	0.60206
CYP4F10P	-2.8413	0.60206
LINC00622	-2.8413	0.60206
GGTA1P	-2.8413	0.60206
GOLGA6L7P	-2.8413	0.60206
HCG4P8	-2.8413	0.60206
NLRP11	-2.8413	0.60206
TPSB2	-2.8413	0.60206
CRTAC1	-2.8413	0.60206
AC117498.2	-2.8413	0.60206
OGFR-AS1	-2.8413	0.60206
STAP2	-2.8413	0.60206
MMP13	-2.8413	0.60206
TDRD10	-2.8413	0.60206
AC025279.2	-2.8413	0.60206
KLKB1	-2.8413	0.60206
AP002433.1	-2.8413	0.60206
TREML3P	-2.8413	0.60206
AC007663.1	-2.8413	0.60206
LINC01949	-2.8413	0.60206
HAO1	-2.8413	0.60206
GATA1	-2.8413	0.60206
TNFRSF11B	-2.8413	0.60206
AC008443.6	-2.8413	0.60206
CLDN6	-2.8413	0.60206
AL139021.2	-2.8413	0.60206
AC008080.4	-2.8413	0.60206
AC022445.1	-2.8413	0.60206
AL671511.1	-2.8413	0.60206
CYTIP	-2.8413	0.60206
MTCYBP19	-2.8413	0.60206
KCNC4-AS1	-2.8413	0.60206
LINC01936	-2.8413	0.60206
ABCB11	-2.8413	0.60206
AL121574.1	-2.8413	0.60206
HNRNPDLP2	-2.8413	0.60206
MMP9	-2.8413	0.60206
UTS2B	-2.8413	0.60206
AC131953.1	-2.8413	0.60206
AC008734.1	-2.8413	0.60206
AC007250.1	-2.8413	0.60206
AC004951.2	-2.8413	0.60206
HOXD3	-2.8413	0.60206
FABP2	-2.8413	0.60206
EFCAB6-AS1	-2.8413	0.60206
SLC12A5-AS1	-2.8413	0.60206
AL354809.1	-2.8413	0.60206
SMTNL1	-2.8413	0.60206
AL355102.5	-2.8413	0.60206
AC079089.1	-2.8413	0.60206
RNA5SP144	-2.8413	0.60206
AC025754.1	-2.8413	0.60206
AL049780.2	-2.8413	0.60206
VTCN1	-2.8413	0.60206
ZNF66	-2.8413	0.60206
C2orf66	-2.8413	0.60206
ZNF709	-2.8413	0.60206
AC026254.4	-2.8413	0.60206
AC244153.1	-2.8413	0.60206
AL589990.1	-2.8413	0.60206
AL121852.1	-2.8413	0.60206
NKX2-4	-2.8413	0.60206
AC004835.1	-2.8413	0.60206
HSPB2-C11orf52	-2.8413	0.60206
AC010319.3	-2.8413	0.60206
CFAP74	-2.8413	0.60206
HPGDS	-2.8413	0.60206
NBPF2P	-2.8413	0.60206
AL021396.1	-2.8413	0.60206
TRIM71	-2.8413	0.60206
AC226119.1	-2.8413	0.60206
AC007601.2	-2.8413	0.60206
AC008080.1	-2.8413	0.60206
AC090330.1	-2.8413	0.60206
LINC01828	-2.8413	0.60206
PTGDS	-2.8413	0.60206
LINC01107	-2.8413	0.60206
R3HDML	-2.8413	0.60206
AP001273.2	-2.8413	0.60206
GATA6-AS1	-2.8413	0.60206
AP003472.1	-2.8413	0.60206
AC131009.1	-2.8413	0.60206
DYNLL1P4	-2.73697	0.771464
AF121898.1	-2.73697	0.771464
AC016877.3	-2.73697	0.771464
AC083836.1	-2.73697	0.771464
RNU2-46P	-2.73697	0.771464
Metazoa_SRP	-2.73697	0.771464
OR7D4	-2.73697	0.771464
RPL21P135	-2.73697	0.771464
AL031595.1	-2.73697	0.771464
AC009779.3	-2.70044	0.695322
TICAM2	-2.68743	0.560469
PDE6B	-2.66985	0.983834
TJP3	-2.64909	1.59601
AC005740.3	-2.62149	1.4797
AL135786.1	-2.62149	0.774402
ANKRD24	-2.60572	0.728163
ATOH7	-2.60572	0.728163
TUG1_3	-2.58496	0.60206
SNORD55	-2.58496	0.60206
AC023509.1	-2.54057	0.58713
TSNAX-DISC1	-2.52655	0.557892
CLEC2B	-2.49881	0.896442
UBD	-2.48063	1.22844
CCDC180	-2.47131	0.559908
AC120498.9	-2.45943	0.901391
AC012409.1	-2.45943	0.60206
AC002451.1	-2.45943	0.60206
WISP1	-2.45943	0.60206
LINC00589	-2.45943	0.60206
CR786580.1	-2.45943	0.60206
AL603914.1	-2.45943	0.60206
AC090502.3	-2.45943	0.60206
AL356124.1	-2.45943	0.60206
AC078906.1	-2.45943	0.60206
AC108134.1	-2.45943	0.60206
AC012485.2	-2.45943	0.60206
AL356275.1	-2.45943	0.60206
MTCO1P27	-2.45943	0.60206
AL352984.1	-2.45943	0.60206
NR0B2	-2.45943	0.60206
CALY	-2.45943	0.60206
AC139491.2	-2.45943	0.60206
LINC02475	-2.45943	0.60206
LINC01010	-2.45943	0.60206
AL132640.1	-2.45943	0.60206
AC110285.1	-2.45943	0.60206
MROH3P	-2.45943	0.60206
AL035530.2	-2.45943	0.60206
C10orf25	-2.45943	0.60206
MAP1LC3C	-2.45943	0.60206
AC009720.1	-2.45943	0.60206
SLC44A4	-2.45943	0.60206
MMP23B	-2.45943	0.60206
AC011346.1	-2.45943	0.60206
HK3	-2.45943	0.60206
POMC	-2.45943	0.60206
SLC5A1	-2.45943	0.60206
LINC02099	-2.45943	0.60206
AL023584.2	-2.45943	0.60206
VIPR1-AS1	-2.45943	0.60206
AC004221.1	-2.45943	0.60206
AC091948.1	-2.45943	0.60206
CRHR1	-2.45943	0.60206
AC079905.2	-2.45943	0.60206
AC074117.2	-2.45943	0.60206
SHISA7	-2.45943	0.60206
MIR409	-2.45943	0.60206
S100G	-2.45943	0.60206
AC068506.1	-2.45943	0.60206
RNU1-62P	-2.45943	0.60206
MIR657	-2.45943	0.60206
5S_rRNA	-2.45943	0.60206
RNA5SP33	-2.45943	0.60206
PALM2-AKAP2	-2.45943	0.60206
AL139254.3	-2.45943	0.60206
AC022201.2	-2.45943	0.60206
RN7SKP12	-2.45943	0.60206
PTGES3L-AARSD1	-2.45943	0.60206
AC242426.2	-2.45943	0.60206
RASL12	-2.45943	0.60206
VSIG8	-2.45943	0.60206
OR51Q1	-2.45943	0.60206
GAS2L2	-2.45943	0.60206
SMIM2	-2.45943	0.60206
NKX6-2	-2.45943	0.60206
LINC01136	-2.45943	0.60206
AL161757.2	-2.45943	0.60206
SLC26A10	-2.45943	0.60206
AL355834.1	-2.45943	0.60206
LINC00629	-2.45943	0.60206
DWORF	-2.45943	0.60206
WDR11-AS1	-2.45943	0.60206
AL352984.2	-2.45943	0.60206
MIR3714	-2.45943	0.60206
AC024267.2	-2.45943	0.60206
AC135506.1	-2.45943	0.60206
GRIFIN	-2.45943	0.60206
AL354877.1	-2.45943	0.60206
GRXCR2	-2.45943	0.60206
LINC01895	-2.45943	0.60206
AC091534.1	-2.45943	0.60206
L3MBTL4-AS1	-2.45943	0.60206
LRMP	-2.45943	0.60206
AC007638.1	-2.45943	0.60206
ARMS2	-2.45943	0.60206
AL035413.1	-2.45943	0.60206
AC005197.1	-2.45943	0.60206
PDLIM4	-2.45943	0.60206
IL12B	-2.45943	0.60206
AC083902.2	-2.45943	0.60206
SFTPA1	-2.45943	0.60206
TAGAP	-2.45943	0.60206
AF038458.2	-2.45943	0.60206
AC079360.1	-2.45943	0.60206
AC007271.1	-2.45943	0.60206
TACC1P1	-2.45943	0.60206
CHST8	-2.45943	0.60206
PGAM5P1	-2.45943	0.60206
SH2D1B	-2.45943	0.60206
CES1P1	-2.45943	0.60206
AC004080.2	-2.45943	0.60206
IL13	-2.45943	0.60206
AL109945.1	-2.45943	0.60206
AC010247.1	-2.45943	0.60206
AC243836.1	-2.45943	0.60206
CD52	-2.45943	0.60206
BHMT	-2.45943	0.60206
DPYD-IT1	-2.45943	0.60206
AL591368.1	-2.45943	0.60206
AC147651.1	-2.45943	0.60206
IGHV3-79	-2.45943	0.60206
AC019055.1	-2.45943	0.60206
AC117422.1	-2.45943	0.60206
AP002008.1	-2.45943	0.60206
AC007365.3	-2.45943	0.60206
Y_RNA	-2.45943	0.60206
GATA3-AS1	-2.45943	0.60206
LINC01615	-2.45943	0.60206
C5orf49	-2.45943	0.60206
MTND1P16	-2.45943	0.60206
AL591686.2	-2.45943	0.60206
AL512634.1	-2.45943	0.60206
AC135352.1	-2.45943	0.60206
AC026410.1	-2.45943	0.60206
MTCYBP12	-2.45943	0.60206
MT1DP	-2.45943	0.60206
AL590396.3	-2.45943	0.60206
INS	-2.45943	0.60206
HRASLS5	-2.45943	0.60206
TNF	-2.45943	0.60206
GEMIN2P1	-2.45943	0.60206
AC005632.4	-2.45943	0.60206
AC093901.1	-2.45943	0.60206
CASP1	-2.45943	0.60206
OR12D2	-2.45943	0.60206
PSG11	-2.45943	0.60206
MYO18B	-2.45943	0.60206
DMRT2	-2.45943	0.60206
CST1	-2.45943	0.60206
AL449403.1	-2.45943	0.60206
DUSP26	-2.45943	0.60206
AC005391.1	-2.45943	0.60206
AC007182.1	-2.45943	0.60206
AC092747.2	-2.45943	0.60206
TBR1	-2.45943	0.60206
LINC02080	-2.45943	0.60206
AC098827.1	-2.45943	0.60206
CHP2	-2.45943	0.60206
LINGO1-AS2	-2.45943	0.60206
BMS1P3	-2.45943	0.60206
TM6SF2	-2.45943	0.60206
AP000424.2	-2.45943	0.60206
ROPN1	-2.45943	0.60206
AJAP1	-2.45943	0.60206
OR5V1	-2.45943	0.60206
AC008743.1	-2.45943	0.60206
AC026954.1	-2.45943	0.60206
RIPOR2	-2.45943	0.60206
LINC02419	-2.45943	0.60206
C10orf67	-2.45943	0.60206
CXCL12	-2.45943	0.60206
CCM2L	-2.45943	0.60206
FAM9C	-2.45943	0.60206
LINC01587	-2.45943	0.60206
BEST2	-2.45943	0.60206
GPR141	-2.45943	0.60206
LINC01948	-2.45943	0.60206
AC244131.2	-2.45943	0.60206
AC004990.1	-2.45943	0.60206
AC019080.3	-2.45943	0.60206
IYD	-2.45943	0.60206
RS1	-2.45943	0.60206
AL033527.5	-2.45943	0.60206
NFE2	-2.45943	0.60206
BBOX1-AS1	-2.45943	0.60206
FMO2	-2.45943	0.60206
LCN15	-2.45943	0.60206
AC007036.1	-2.45943	0.60206
HFM1	-2.45943	0.60206
HMCN1	-2.45943	0.60206
LINC02094	-2.45943	0.60206
AC015878.2	-2.45943	0.60206
TMEM233	-2.45943	0.60206
SNORD54	-2.45943	0.60206
NDNF	-2.45943	0.60206
AC104791.1	-2.45943	0.60206
EPHB1	-2.45943	0.60206
SPINT1	-2.45943	0.60206
PNMA3	-2.45943	0.60206
HSD3BP5	-2.45943	0.60206
PTCHD4	-2.45943	0.60206
TPT1P12	-2.45943	0.60206
ATP1B2	-2.45943	0.60206
CYCSP4	-2.45943	0.60206
ADGRF2	-2.45943	0.60206
AFDN-AS1	-2.45943	0.60206
GPR1	-2.45943	0.60206
LINC01634	-2.45943	0.60206
NIPA2P4	-2.45943	0.60206
NANOGP2	-2.45943	0.60206
FRMPD1	-2.45943	0.60206
RBM48P1	-2.45943	0.60206
ZNF863P	-2.45943	0.60206
SNORA18	-2.45943	0.60206
AC007688.2	-2.45943	0.60206
AP003355.3	-2.45943	0.60206
CD248	-2.45943	0.60206
LINC02225	-2.45943	0.60206
LILRB5	-2.45943	0.60206
CATIP-AS1	-2.45943	0.60206
CELP	-2.45943	0.60206
AC063944.1	-2.45943	0.60206
AP001085.1	-2.45943	0.60206
SLURP1	-2.45943	0.60206
AC022217.4	-2.45943	0.60206
AC026992.1	-2.45943	0.60206
ACPP	-2.45943	0.60206
LINC02274	-2.45943	0.60206
AC023908.1	-2.45943	0.60206
C11orf87	-2.45943	0.60206
AC104781.1	-2.45943	0.60206
AC096582.3	-2.45943	0.60206
AC098847.2	-2.45943	0.60206
KLHL33	-2.45943	0.60206
S1PR1	-2.45943	0.60206
PDX1	-2.45943	0.60206
Y_RNA	-2.45943	0.60206
TRGV9	-2.45943	0.60206
GRPR	-2.45943	0.60206
AC107977.1	-2.45943	0.60206
AL080312.2	-2.45943	0.60206
AC012409.4	-2.45943	0.60206
CFAP61	-2.45943	0.60206
AC021269.2	-2.45943	0.60206
CELSR3-AS1	-2.45943	0.60206
PRSS30P	-2.45943	0.60206
UPB1	-2.45943	0.60206
AC083973.1	-2.45943	0.60206
ARMCX1	-2.45943	0.60206
AC110609.1	-2.45943	0.60206
CR936218.2	-2.45943	0.60206
AL513188.1	-2.45943	0.60206
AP001107.2	-2.45943	0.60206
RPL6P9	-2.45943	0.60206
NINJ2	-2.45943	0.60206
HHLA2	-2.45943	0.60206
AC034236.3	-2.45943	0.60206
AL133417.1	-2.45943	0.60206
FAM83F	-2.45943	0.60206
LCNL1	-2.45943	0.60206
ANKFN1	-2.45943	0.60206
MUC2	-2.45943	0.60206
MYOM1	-2.45943	0.60206
PRR29-AS1	-2.45943	0.60206
LINC00958	-2.45943	0.60206
AC100771.2	-2.44746	1.55263
AP000692.2	-2.44746	1.26381
SNORD46	-2.42884	1.57819
C8orf34	-2.42884	1.57819
AC132219.1	-2.42884	1.57819
AC004706.3	-2.42884	1.57819
RNU6-1257P	-2.42884	1.57819
SLC14A2	-2.42884	0.829233
SNORA26	-2.42884	0.829233
AC134772.1	-2.42884	0.642142
MTRNR2L7	-2.42884	0.642142
RN7SL362P	-2.4021	0.590817
GJA9	-2.36257	0.769768
NR1H4	-2.3489	1.41109
RPL36AP29	-2.32193	0.900782
AP000827.1	-2.32193	0.900782
AP003497.1	-2.32193	0.900782
AC013437.2	-2.32193	0.900782
MIR3691	-2.32193	0.900782
RBAKDN	-2.32193	0.900782
AC069437.1	-2.32193	0.900782
MIR541	-2.32193	0.900782
AL049874.1	-2.32193	0.900782
AC009784.1	-2.32193	0.900782
COX6CP7	-2.32193	0.900782
TMEM210	-2.32193	0.900782
HMGB1P15	-2.32193	0.900782
NANOGP7	-2.32193	0.900782
AC012317.2	-2.32193	0.900782
OR7E161P	-2.32193	0.900782
RPS2P52	-2.32193	0.900782
RNU6-150P	-2.32193	0.900782
TMEM256P2	-2.32193	0.900782
OR52T1P	-2.32193	0.900782
EIF3EP2	-2.32193	0.900782
DUXAP5	-2.32193	0.900782
RNA5SP345	-2.32193	0.900782
AC024901.1	-2.32193	0.900782
MTRNR2L2	-2.32193	0.900782
AC007849.1	-2.32193	0.900782
DPPA5P4	-2.32193	0.900782
RAC1P3	-2.32193	0.900782
AL355355.2	-2.32193	0.900782
AC138625.2	-2.32193	0.900782
TNFSF18	-2.32193	0.900782
DACH2	-2.32193	0.900782
RNU6-236P	-2.32193	0.900782
AC107952.2	-2.32193	0.900782
AL160191.3	-2.32193	0.900782
PRKACG	-2.32193	0.900782
AC004917.1	-2.32193	0.900782
AC009452.1	-2.32193	0.900782
RNU6-828P	-2.32193	0.900782
RNU6-1321P	-2.32193	0.900782
AC021146.2	-2.32193	0.900782
MIR1185-1	-2.32193	0.900782
TEX11	-2.32193	0.900782
AC013470.1	-2.32193	0.900782
uc_338	-2.32193	0.900782
Z98751.2	-2.32193	0.900782
CA15P1	-2.32193	0.900782
EIF4A2P5	-2.32193	0.900782
MIR3163	-2.32193	0.900782
Y_RNA	-2.32193	0.900782
RPL21P13	-2.32193	0.900782
RNU6-1250P	-2.32193	0.900782
CALN1	-2.32193	0.900782
AL157895.1	-2.32193	0.900782
ZNF90	-2.32193	0.900782
AC105129.2	-2.32193	0.900782
RN7SL26P	-2.32193	0.900782
AC130456.1	-2.32193	0.900782
AC099509.2	-2.32193	0.900782
MIR4721	-2.32193	1.10802
SYNJ2BP-COX16	-2.32193	0.693338
SHC4	-2.27753	1.16735
AL133215.1	-2.27684	0.568243
MRPS31P5	-2.26849	0.606451
AC027698.1	-2.2578	1.4617
LINC01852	-2.2578	1.4617
AC002470.1	-2.2578	1.4617
OSCAR	-2.2578	1.09783
AL512430.2	-2.2578	0.67401
AC006994.1	-2.24793	1.20181
SNORD18A	-2.24793	0.60206
AC112484.2	-2.23266	0.836014
SNORA51	-2.20645	1.32733
AC005034.4	-2.20645	1.32733
UCA1	-2.20645	1.32733
AC005324.4	-2.20645	1.32733
RNU6-399P	-2.20645	0.940947
LINC01198	-2.20645	0.940947
LINC00884	-2.20645	0.940947
Y_RNA	-2.20645	0.940947
MIR548O2	-2.20645	0.652742
MIR3684	-2.20645	0.652742
PRSS35	-2.18442	1.25187
AC024909.3	-2.1819	0.54266
AL020996.3	-2.16993	1.34518
TFEC	-2.16993	1.09628
CFAP206	-2.16993	1.09628
RN7SL824P	-2.16294	0.553448
HAS2-AS1	-2.14684	0.949208
RAB37	-2.13245	0.938064
NBPF10	-2.12711	0.586758
AL365181.4	-2.12029	0.861935
PRELP	-2.12029	0.861935
AC008494.3	-2.11548	0.865521
AC004987.2	-2.11548	0.771846
FP671120.4	-2.11506	0.584181
HCAR3	-2.08746	1.56333
AF131216.3	-2.08489	1.32085
ALOX5	-2.08489	1.05951
AL161725.1	-2.08489	0.829938
CLEC4E	-2.07617	1.10811
AC091167.3	-2.07301	1.05057
AC114810.1	-2.05344	0.916242
SCARNA12	-2.03006	0.576811
AC104763.3	-2.02975	0.62051
AL365232.1	-2.02748	0.560926
COL28A1	-2.0156	0.547637
FP671120.3	-2.0107	0.581142
FP236383.2	-2.0107	0.581142
FP236383.3	-2.0107	0.581142
UGT2B15	-2	1.52659
uc_338	-2	0.989631
CFAP53	-2	0.637678
LGALS4	-1.98313	1.02522
LINC01146	-1.98313	0.843448
SLC17A1	-1.98313	0.6006
AL589666.1	-1.9823	0.591138
AL034417.3	-1.97797	1.15471
LINC02212	-1.97797	0.876573
CFAP221	-1.97797	0.720731
AC009229.4	-1.96829	1.29133
SUGCT	-1.96829	1.29133
RFPL2	-1.96829	0.950947
ARHGAP26-AS1	-1.96829	0.950947
ZSCAN12P1	-1.96829	0.950947
AC084024.3	-1.96829	0.705674
AC005306.1	-1.96829	0.705674
MIR5692C2	-1.96829	0.705674
LBHD1	-1.95872	0.60755
ST6GAL2	-1.95491	0.86902
HRH1	-1.94526	1.04185
GRM1	-1.94342	1.27091
RNU2-72P	-1.94342	1.27091
RNU4-53P	-1.94342	1.27091
AL358075.2	-1.94342	1.27091
GPR152	-1.94342	1.27091
AL034374.2	-1.94342	1.27091
MIR3646	-1.94342	1.27091
YWHAQP7	-1.94342	1.27091
ATG4AP1	-1.94342	1.27091
HCP5B	-1.94342	1.27091
AC107083.1	-1.94342	1.27091
AC093535.2	-1.94342	1.27091
U3	-1.94342	1.27091
AC015967.1	-1.94342	1.27091
AL513331.1	-1.94342	1.27091
AC023424.1	-1.94342	1.27091
BRWD1P2	-1.94342	1.27091
SNORA70F	-1.94342	1.27091
PPIAP7	-1.94342	1.27091
RNU6-1203P	-1.94342	1.27091
SNORD13P3	-1.94342	1.27091
AL445423.1	-1.94342	1.27091
AC068189.2	-1.94342	1.27091
AC012254.1	-1.94342	0.670972
SNORA27	-1.94342	0.670972
NPPA-AS1_2	-1.94342	0.670972
Y_RNA	-1.94342	0.670972
MIR320C1	-1.94342	0.670972
RN7SKP96	-1.94342	0.670972
AC138466.4	-1.94342	0.670972
Y_RNA	-1.94342	0.670972
RPL27AP8	-1.94342	0.670972
BIN2	-1.9386	0.60206
GNG7	-1.9386	0.60206
CXCL6	-1.9386	0.60206
AL163636.1	-1.9386	0.60206
CTD-2201I18.1	-1.9386	0.60206
AC026748.1	-1.9386	0.60206
RNU2-62P	-1.9386	0.60206
AC133794.1	-1.9386	0.60206
AC013489.2	-1.9386	0.60206
AC004585.2	-1.9386	0.60206
AC112518.1	-1.9386	0.60206
VNN2	-1.9386	0.60206
AL137785.1	-1.9386	0.60206
ADGRG7	-1.9386	0.60206
AL355493.2	-1.9386	0.60206
AC099677.2	-1.9386	0.60206
CDH15	-1.9386	0.60206
MTCYBP40	-1.9386	0.60206
AL451007.2	-1.9386	0.60206
AC011899.1	-1.9386	0.60206
AC104561.3	-1.9386	0.60206
HAAO	-1.9386	0.60206
MALRD1	-1.9386	0.60206
FGF7P4	-1.9386	0.60206
OR1F2P	-1.9386	0.60206
HOXA11-AS	-1.9386	0.60206
RPL6P5	-1.9386	0.60206
AC091905.2	-1.9386	0.60206
AL590096.1	-1.9386	0.60206
AC084752.1	-1.9386	0.60206
AC244517.12	-1.9386	0.60206
AL590326.1	-1.9386	0.60206
LINC02092	-1.9386	0.60206
MTND4LP24	-1.9386	0.60206
AP003774.1	-1.9386	0.60206
Y_RNA	-1.9386	0.60206
AL021408.2	-1.9386	0.60206
AP006547.1	-1.9386	0.60206
OR51B4	-1.9386	0.60206
MTND3P9	-1.9386	0.60206
RNU1-8P	-1.9386	0.60206
ACKR2	-1.9386	0.60206
RN7SKP7	-1.9386	0.60206
DEFB109A	-1.9386	0.60206
AC005342.1	-1.9386	0.60206
AC007375.1	-1.9386	0.60206
SNORA26	-1.9386	0.60206
AC007687.1	-1.9386	0.60206
AC006206.1	-1.9386	0.60206
ZNF429	-1.9386	0.60206
AP001646.3	-1.9386	0.60206
CYP3A43	-1.9386	0.60206
G6PC	-1.9386	0.60206
AL356981.1	-1.9386	0.60206
CAPN13	-1.9386	0.60206
U62317.5	-1.9386	0.60206
AC010615.2	-1.9386	0.60206
FGF7P5	-1.9386	0.60206
RPL21P50	-1.9386	0.60206
Vault	-1.9386	0.60206
AC097065.1	-1.9386	0.60206
ESRRG	-1.9386	0.60206
TIE1	-1.9386	0.60206
AIMP1P2	-1.9386	0.60206
CDKN2B-AS1	-1.9386	0.60206
AC131097.1	-1.9386	0.60206
AL592221.1	-1.9386	0.60206
RPS11P1	-1.9386	0.60206
RALYL	-1.9386	0.60206
AL049697.2	-1.9386	0.60206
VN1R20P	-1.9386	0.60206
AC079171.1	-1.9386	0.60206
AC079602.1	-1.9386	0.60206
RPS6P12	-1.9386	0.60206
RN7SL601P	-1.9386	0.60206
F11-AS1	-1.9386	0.60206
AC140847.2	-1.9386	0.60206
AL132857.2	-1.9386	0.60206
RN7SKP244	-1.9386	0.60206
AC009163.6	-1.9386	0.60206
KRT19P3	-1.9386	0.60206
AC111000.1	-1.9386	0.60206
MIR4511	-1.9386	0.60206
TPT1P14	-1.9386	0.60206
AF250324.2	-1.9386	0.60206
AC006427.1	-1.9386	0.60206
AL352977.2	-1.9386	0.60206
GYG1P2	-1.9386	0.60206
RNA5SP379	-1.9386	0.60206
AC007879.3	-1.9386	0.60206
LINC01553	-1.9386	0.60206
AC013553.4	-1.9386	0.60206
AL161447.1	-1.9386	0.60206
SNORA43	-1.9386	0.60206
RNU6-918P	-1.9386	0.60206
AL117339.1	-1.9386	0.60206
RBM43P1	-1.9386	0.60206
AC008567.1	-1.9386	0.60206
AC078867.1	-1.9386	0.60206
AL672167.1	-1.9386	0.60206
AC041040.2	-1.9386	0.60206
SVOPL	-1.9386	0.60206
AL157407.1	-1.9386	0.60206
AC012629.3	-1.9386	0.60206
SLC2A2	-1.9386	0.60206
BX842559.2	-1.9386	0.60206
AC010970.1	-1.9386	0.60206
POTEC	-1.9386	0.60206
ROPN1B	-1.9386	0.60206
AC021146.1	-1.9386	0.60206
SYNPO2L	-1.9386	0.60206
PLA2G4E	-1.9386	0.60206
LINC01238	-1.9386	0.60206
CORIN	-1.9386	0.60206
UBQLNL	-1.9386	0.60206
AP005131.7	-1.9386	0.60206
POM121L2	-1.9386	0.60206
RNU6-944P	-1.9386	0.60206
AC108449.1	-1.9386	0.60206
PTCHD3P3	-1.9386	0.60206
ARHGAP19-SLIT1	-1.9386	0.60206
SLC1A3	-1.9386	0.60206
MIR921	-1.9386	0.60206
AC078850.2	-1.9386	0.60206
Y_RNA	-1.9386	0.60206
RPL12P49	-1.9386	0.60206
AL662890.1	-1.9386	0.60206
FAM183A	-1.9386	0.60206
FUT3	-1.9386	0.60206
AC009318.4	-1.9386	0.60206
AL356750.1	-1.9386	0.60206
VN1R110P	-1.9386	0.60206
MTCYBP33	-1.9386	0.60206
GJA8	-1.9386	0.60206
AC121247.2	-1.9386	0.60206
RPL18AP8	-1.9386	0.60206
MIR548Q	-1.9386	0.60206
AC079610.2	-1.9386	0.60206
RPS27AP15	-1.9386	0.60206
AC068473.3	-1.9386	0.60206
TMED11P	-1.9386	0.60206
SPATA31A6	-1.9386	0.60206
AC021683.4	-1.9386	0.60206
RPL7P29	-1.9386	0.60206
RNU6-452P	-1.9386	0.60206
Z82170.1	-1.9386	0.60206
AC002472.3	-1.9386	0.60206
AC090124.2	-1.9386	0.60206
AP001330.3	-1.9386	0.60206
Z99755.1	-1.9386	0.60206
NANOS2	-1.9386	0.60206
RNA5SP325	-1.9386	0.60206
AP002986.1	-1.9386	0.60206
LINC00967	-1.9386	0.60206
KRTAP26-1	-1.9386	0.60206
AC080129.2	-1.9386	0.60206
AC006499.2	-1.9386	0.60206
RNU6-842P	-1.9386	0.60206
AC112203.1	-1.9386	0.60206
AC060766.2	-1.9386	0.60206
AC020911.2	-1.9386	0.60206
RPLP0P1	-1.9386	0.60206
C4orf17	-1.9386	0.60206
RASA4DP	-1.9386	0.60206
ZNF645	-1.9386	0.60206
AC015911.8	-1.9386	0.60206
AC027281.1	-1.9386	0.60206
MAGI2-AS1	-1.9386	0.60206
AC006499.4	-1.9386	0.60206
MTCO3P31	-1.9386	0.60206
PTP4A1P3	-1.9386	0.60206
AC015813.3	-1.9386	0.60206
RNA5SP394	-1.9386	0.60206
PPP1R1A	-1.9386	0.60206
ZNF971P	-1.9386	0.60206
TBC1D3P1	-1.9386	0.60206
LUADT1	-1.9386	0.60206
AC073626.1	-1.9386	0.60206
AC108747.1	-1.9386	0.60206
OR52L2P	-1.9386	0.60206
FAM228A	-1.9386	0.60206
AL132994.2	-1.9386	0.60206
SKAP1-AS1	-1.9386	0.60206
AC040926.1	-1.9386	0.60206
RFPL1	-1.9386	0.60206
AC022140.1	-1.9386	0.60206
GJA10	-1.9386	0.60206
AC092162.1	-1.9386	0.60206
NDUFB2P1	-1.9386	0.60206
AC092325.1	-1.9386	0.60206
AC078788.2	-1.9386	0.60206
AC104462.2	-1.9386	0.60206
AL161912.2	-1.9386	0.60206
AC017037.1	-1.9386	0.60206
OR2W3	-1.9386	0.60206
AC080128.1	-1.9386	0.60206
GDF5OS	-1.9386	0.60206
F2RL3	-1.9386	0.60206
RPS27AP18	-1.9386	0.60206
FBXO47	-1.9386	0.60206
FLJ42102	-1.9386	0.60206
ALG1L14P	-1.9386	0.60206
PRSS57	-1.9386	0.60206
AC016598.1	-1.9386	0.60206
ATP5A1P4	-1.9386	0.60206
OR5AM1P	-1.9386	0.60206
RPL35AP4	-1.9386	0.60206
AC104076.1	-1.9386	0.60206
MRPL32P1	-1.9386	0.60206
AP003497.2	-1.9386	0.60206
AC116353.4	-1.9386	0.60206
AP000281.2	-1.9386	0.60206
RNU6-1123P	-1.9386	0.60206
AL035411.2	-1.9386	0.60206
AC005520.4	-1.9386	0.60206
EGFEM1P	-1.9386	0.60206
DIMT1P1	-1.9386	0.60206
Y_RNA	-1.9386	0.60206
RN7SKP57	-1.9386	0.60206
OOEP	-1.9386	0.60206
AL355149.1	-1.9386	0.60206
AC103851.1	-1.9386	0.60206
AC114316.2	-1.9386	0.60206
TRIM40	-1.9386	0.60206
LINC00112	-1.9386	0.60206
AC106754.1	-1.9386	0.60206
AL390866.1	-1.9386	0.60206
AC069335.1	-1.9386	0.60206
AC008738.1	-1.9386	0.60206
IGLV3-29	-1.9386	0.60206
AL021879.1	-1.9386	0.60206
AL596266.1	-1.9386	0.60206
KCNMB2-AS1	-1.9386	0.60206
PTPRD-AS2	-1.9386	0.60206
AC124944.1	-1.9386	0.60206
FOLR2	-1.9386	0.60206
C1QTNF5	-1.9386	0.60206
AL024474.1	-1.9386	0.60206
NFYAP1	-1.9386	0.60206
FAM153A	-1.9386	0.60206
AC226150.1	-1.9386	0.60206
AC006065.6	-1.9386	0.60206
AC005066.1	-1.9386	0.60206
AC026765.1	-1.9386	0.60206
MYO3B	-1.9386	0.60206
TSPAN16	-1.9386	0.60206
FZD10	-1.9386	0.60206
AL023973.1	-1.9386	0.60206
AC117489.1	-1.9386	0.60206
AC026801.1	-1.9386	0.60206
AC105384.1	-1.9386	0.60206
AL138731.1	-1.9386	0.60206
LINC01616	-1.9386	0.60206
ARHGEF3-AS1	-1.9386	0.60206
PRDX2P4	-1.9386	0.60206
AC068228.2	-1.9386	0.60206
AC099314.1	-1.9386	0.60206
AC084291.1	-1.9386	0.60206
MCEMP1	-1.9386	0.60206
OR4A43P	-1.9386	0.60206
AL356489.1	-1.9386	0.60206
LINC01742	-1.9386	0.60206
Y_RNA	-1.9386	0.60206
OLIG1	-1.9386	0.60206
AC006449.3	-1.9386	0.60206
GPN3P1	-1.9386	0.60206
BPIFB1	-1.9386	0.60206
TPTE2P2	-1.9386	0.60206
AC026414.1	-1.9386	0.60206
AL356057.3	-1.9386	0.60206
MTATP6P24	-1.9386	0.60206
CRAT37	-1.9386	0.60206
AC004009.3	-1.9386	0.60206
PNLIPP1	-1.9386	0.60206
TPM3P2	-1.9386	0.60206
AC099805.1	-1.9386	0.60206
DKK2	-1.9386	0.60206
PAICSP2	-1.9386	0.60206
Y_RNA	-1.9386	0.60206
AL358913.2	-1.9386	0.60206
FAM25G	-1.9386	0.60206
F13A1	-1.9386	0.60206
RNA5SP223	-1.9386	0.60206
NAALADL2-AS3	-1.9386	0.60206
AL451105.2	-1.9386	0.60206
RABEPKP1	-1.9386	0.60206
LINC02502	-1.9386	0.60206
RNU6-837P	-1.9386	0.60206
Z85996.1	-1.9386	0.60206
AC108066.1	-1.9386	0.60206
KCNK10	-1.9386	0.60206
LINC01998	-1.9386	0.60206
ARL11	-1.9386	0.60206
MIR4452	-1.9386	0.60206
RERG-IT1	-1.9386	0.60206
EIF5AP2	-1.9386	0.60206
AL512303.1	-1.9386	0.60206
AC021205.2	-1.9386	0.60206
MIR665	-1.9386	0.60206
CD34	-1.9386	0.60206
AC066616.1	-1.9386	0.60206
AC006504.4	-1.9386	0.60206
MTTP	-1.9386	0.60206
AC007405.1	-1.9386	0.60206
AC022296.3	-1.9386	0.60206
AP003484.1	-1.9386	0.60206
ATXN3L	-1.9386	0.60206
ABCA9	-1.9386	0.60206
AC107294.2	-1.9386	0.60206
OR51A5P	-1.9386	0.60206
AC239367.3	-1.9386	0.60206
TUBB4BP6	-1.9386	0.60206
OR52X1P	-1.9386	0.60206
BRD9P1	-1.9386	0.60206
ECEL1	-1.9386	0.60206
AC023078.6	-1.9386	0.60206
AC148477.1	-1.9386	0.60206
AC136601.2	-1.9386	0.60206
AC009229.3	-1.9386	0.60206
AC093249.3	-1.9386	0.60206
RN7SKP117	-1.9386	0.60206
RPLP1P10	-1.9386	0.60206
AC024581.1	-1.9386	0.60206
RN7SKP2	-1.9386	0.60206
POLR2LP1	-1.9386	0.60206
AL008638.3	-1.9386	0.60206
AL389915.1	-1.9386	0.60206
MIR493	-1.9386	0.60206
RNU6ATAC14P	-1.9386	0.60206
RNU6-14P	-1.9386	0.60206
Y_RNA	-1.9386	0.60206
MIR4308	-1.9386	0.60206
HMGB1P18	-1.9386	0.60206
RPS27P22	-1.9386	0.60206
AC010761.2	-1.9386	0.60206
OR11A1	-1.9386	0.60206
AC017007.5	-1.9386	0.60206
OR2T12	-1.9386	0.60206
AL355860.1	-1.9386	0.60206
RNA5SP454	-1.9386	0.60206
AC015656.1	-1.9386	0.60206
CCDC185	-1.9386	0.60206
SLC24A2	-1.9386	0.60206
AP000346.4	-1.9386	0.60206
AC125437.2	-1.9386	0.60206
AC010132.3	-1.9386	0.60206
AC004233.2	-1.9386	0.60206
AC068305.3	-1.9386	0.60206
AC087269.2	-1.9386	0.60206
AL353135.1	-1.9386	0.60206
AC093519.1	-1.9386	0.60206
Y_RNA	-1.9386	0.60206
AL133267.1	-1.9386	0.60206
GPR119	-1.9386	0.60206
TATDN2P1	-1.9386	0.60206
AC073255.1	-1.9386	0.60206
RPSAP25	-1.9386	0.60206
PABPC1L2B	-1.9386	0.60206
ADGRF5P1	-1.9386	0.60206
RNA5SP339	-1.9386	0.60206
RNU6-598P	-1.9386	0.60206
AC139493.1	-1.9386	0.60206
AC040174.2	-1.9386	0.60206
NETO1	-1.9386	0.60206
CLRN1-AS1	-1.9386	0.60206
RNU6-391P	-1.9386	0.60206
AC091812.3	-1.9386	0.60206
SLC1A6	-1.9386	0.60206
AC026826.3	-1.9386	0.60206
COX5BP7	-1.9386	0.60206
KCND2	-1.9386	0.60206
RNU6-784P	-1.9386	0.60206
UBQLN3	-1.9386	0.60206
AC092667.1	-1.9386	0.60206
AC110620.1	-1.9386	0.60206
DCAF4L2	-1.9386	0.60206
MRGPRD	-1.9386	0.60206
AC011825.4	-1.9386	0.60206
OR5K4	-1.9386	0.60206
FAM96AP1	-1.9386	0.60206
LINC01801	-1.9386	0.60206
OR9H1P	-1.9386	0.60206
FSCB	-1.9386	0.60206
MTCO3P35	-1.9386	0.60206
PSMB11	-1.9386	0.60206
C22orf34	-1.9386	0.60206
AL365361.1	-1.9386	0.60206
Y_RNA	-1.9386	0.60206
AC117377.1	-1.9386	0.60206
KSR1P1	-1.9386	0.60206
AC011511.3	-1.9386	0.60206
Y_RNA	-1.9386	0.60206
C3orf84	-1.9386	0.60206
LINC01597	-1.9386	0.60206
LRRC2	-1.9386	0.60206
GDNF	-1.9386	0.60206
AC106786.1	-1.9386	0.60206
AC007342.3	-1.9386	0.60206
AC010255.2	-1.9386	0.60206
ANOS1	-1.9386	0.60206
AC006499.6	-1.9386	0.60206
LTV1P1	-1.9386	0.60206
FPR1	-1.9386	0.60206
TRBV20OR9-2	-1.9386	0.60206
AC105020.5	-1.9386	0.60206
AL590648.1	-1.9386	0.60206
ACA64	-1.9386	0.60206
LRRC10	-1.9386	0.60206
AC010087.1	-1.9386	0.60206
FLJ22447	-1.9386	0.60206
AC090877.1	-1.9386	0.60206
AP000569.1	-1.9386	0.60206
AP000229.1	-1.9386	0.60206
LINC00567	-1.9386	0.60206
AC139365.1	-1.9386	0.60206
KRTAP5-2	-1.9386	0.60206
MIR599	-1.9386	0.60206
PRELID3BP11	-1.9386	0.60206
AP000787.3	-1.9386	0.60206
HMGB3P5	-1.9386	0.60206
LINC00552	-1.9386	0.60206
AC068831.4	-1.9386	0.60206
Metazoa_SRP	-1.9386	0.60206
NCAN	-1.9386	0.60206
AL356740.1	-1.9386	0.60206
RNU6-59P	-1.9386	0.60206
MIR2053	-1.9386	0.60206
AC023983.2	-1.9386	0.60206
RN7SL51P	-1.9386	0.60206
JKAMPP1	-1.9386	0.60206
AC104958.2	-1.9386	0.60206
OR6W1P	-1.9386	0.60206
AC005498.2	-1.9386	0.60206
AC087277.2	-1.9386	0.60206
SLC25A36P1	-1.9386	0.60206
AL731555.1	-1.9386	0.60206
GPR84	-1.9386	0.60206
AC093849.1	-1.9386	0.60206
OR2J1	-1.9386	0.60206
RNU6-1115P	-1.9386	0.60206
AC097478.3	-1.9386	0.60206
AC092159.4	-1.9386	0.60206
RNU2-48P	-1.9386	0.60206
Metazoa_SRP	-1.9386	0.60206
AC027348.2	-1.9386	0.60206
MIR542	-1.9386	0.60206
RNA5SP198	-1.9386	0.60206
AC009264.1	-1.9386	0.60206
RBM22P7	-1.9386	0.60206
Y_RNA	-1.9386	0.60206
MIR5580	-1.9386	0.60206
AC097059.1	-1.9386	0.60206
AK4P5	-1.9386	0.60206
AC005229.2	-1.9386	0.60206
AC099782.1	-1.9386	0.60206
GEMIN8P2	-1.9386	0.60206
Y_RNA	-1.9386	0.60206
AC093010.1	-1.9386	0.60206
AC104073.1	-1.9386	0.60206
RNY3P11	-1.9386	0.60206
LINC01206	-1.9386	0.60206
DYNLL1P3	-1.9386	0.60206
UBE2V1P5	-1.9386	0.60206
MIR758	-1.9386	0.60206
RPL36P20	-1.9386	0.60206
BUD13P1	-1.9386	0.60206
ST6GALNAC5	-1.9386	0.60206
AC051649.2	-1.9386	0.60206
RNU6-910P	-1.9386	0.60206
RNU6-240P	-1.9386	0.60206
KRT5	-1.9386	0.60206
TCAM1P	-1.9386	0.60206
AL035407.1	-1.9386	0.60206
Y_RNA	-1.9386	0.60206
AC005736.2	-1.9386	0.60206
RNU6-1183P	-1.9386	0.60206
SSR1P2	-1.9386	0.60206
AC009120.3	-1.9386	0.60206
ECM1P1	-1.9386	0.60206
AC069218.2	-1.9386	0.60206
AC005796.1	-1.9386	0.60206
ENPP7P14	-1.9386	0.60206
OR6B2	-1.9386	0.60206
OR10W1	-1.9386	0.60206
RPL5P7	-1.9386	0.60206
GALNT8	-1.9386	0.60206
OR13J1	-1.9386	0.60206
RN7SL290P	-1.9386	0.60206
ALOX15	-1.9386	0.60206
AC008628.2	-1.9386	0.60206
AC064805.1	-1.9386	0.60206
TECTB	-1.9386	0.60206
AC009159.3	-1.9386	0.60206
LHCGR	-1.9386	0.60206
AC113615.1	-1.9386	0.60206
RNA5SP156	-1.9386	0.60206
CYP2B7P	-1.9386	0.60206
AL110292.1	-1.9386	0.60206
MTCO3P18	-1.9386	0.60206
CENPUP2	-1.9386	0.60206
ZNF619P1	-1.9386	0.60206
RPS12P10	-1.9386	0.60206
SNORD51	-1.9386	0.60206
RNA5SP35	-1.9386	0.60206
Y_RNA	-1.9386	0.60206
OR2W1	-1.9386	0.60206
AC006116.6	-1.9386	0.60206
ZNF716	-1.9386	0.60206
RNU6-1176P	-1.9386	0.60206
MIR4307HG	-1.9386	0.60206
CACNA1C-AS1	-1.9386	0.60206
TOPORSLP1	-1.9386	0.60206
AC005779.1	-1.9386	0.60206
PSG7	-1.9386	0.60206
BOLA3P4	-1.9386	0.60206
AC010478.1	-1.9386	0.60206
IRS4	-1.9386	0.60206
AC079075.1	-1.9386	0.60206
RNU6-1077P	-1.9386	0.60206
RNU6-895P	-1.9386	0.60206
AC090505.1	-1.9386	0.60206
AC008555.1	-1.9386	0.60206
BX649632.1	-1.9386	0.60206
AL359852.1	-1.9386	0.60206
RBMXL2	-1.9386	0.60206
LINC01088	-1.9386	0.60206
ATP1A2	-1.9386	0.60206
LINC01933	-1.9386	0.60206
GPR143	-1.9386	0.60206
LINC02167	-1.9386	0.60206
OR4K13	-1.9386	0.60206
LINC01537	-1.9386	0.60206
SGIP1	-1.9386	0.60206
RPEP1	-1.9386	0.60206
AC105415.1	-1.9386	0.60206
CYP2A7	-1.9386	0.60206
ADRA1A	-1.9386	0.60206
LINC02268	-1.9386	0.60206
NR2E1	-1.9386	0.60206
MARCKSL1P2	-1.9386	0.60206
AL590999.1	-1.9386	0.60206
RNU1-108P	-1.9386	0.60206
AP003559.1	-1.9386	0.60206
AC026358.1	-1.9386	0.60206
AC097474.1	-1.9386	0.60206
PXT1	-1.9386	0.60206
AC130415.1	-1.9386	0.60206
AGBL1	-1.9386	0.60206
ENPP7P7	-1.9386	0.60206
AL359693.1	-1.9386	0.60206
AC126182.1	-1.9386	0.60206
LINC01635	-1.9386	0.60206
AC091806.1	-1.9386	0.60206
STAC2	-1.9386	0.60206
AC105036.2	-1.9386	0.60206
ERICH6	-1.9386	0.60206
ART5	-1.9386	0.60206
AC245014.1	-1.9386	0.60206
AC116609.1	-1.9386	0.60206
AC011726.2	-1.9386	0.60206
CCDC153	-1.9386	0.60206
PRDM8	-1.9386	0.60206
RTL9	-1.9386	0.60206
HIGD2B	-1.9386	0.60206
SPANXC	-1.9386	0.60206
HOXD4	-1.9386	0.60206
AC016405.1	-1.9386	0.60206
RFPL1S	-1.926	0.675037
SPIN1	-1.92533	0.637106
LINC02166	-1.89566	1.14306
CYP4F29P	-1.89308	1.13294
MSANTD3-TMEFF1	-1.88107	0.707979
OR4Q3	-1.87447	1.82598
AL445231.1	-1.87447	0.693338
NPY2R	-1.87447	0.640815
TTC41P	-1.86994	1.22016
KPNA7	-1.8625	1.0187
AL359317.2	-1.8625	0.93839
NEURL3	-1.8625	0.93839
AC099668.1	-1.8625	0.741558
CRH	-1.8625	0.741558
AC080013.5	-1.8625	0.634385
AL627443.1	-1.85148	0.540193
LRRC56	-1.85148	0.540193
HOXB-AS1	-1.848	1.31345
PGPEP1	-1.82312	1.14372
MTCO1P22	-1.80735	1.20181
ZNF702P	-1.80735	1.20181
AL359921.1	-1.80735	1.20181
Metazoa_SRP	-1.80735	0.764419
OR52I2	-1.80735	0.764419
AL513302.1	-1.80735	0.764419
RN7SKP93	-1.80735	0.764419
PHBP2	-1.80735	0.60206
LINC02015	-1.80255	1.09926
AP003392.6	-1.79837	1.08269
SNORA74	-1.79837	1.08269
LYST-AS1	-1.79837	1.08269
GRIA4	-1.79837	1.08269
TSGA13	-1.79837	1.08269
AC131235.4	-1.79837	1.08269
AC009314.1	-1.79837	1.08269
OVOL2	-1.79837	1.03498
AL592071.1	-1.79837	0.73354
CAPN8	-1.79837	0.73354
RPL21P32	-1.79837	0.592586
ITGA10	-1.7885	0.592227
AC090192.2	-1.78715	0.84767
SOX2	-1.78338	1.22293
DCP2	-1.77866	1.05291
SNAP23P1	-1.76553	1.19336
MIR3142HG	-1.76553	0.780285
IL1R2	-1.76393	1.04791
AL136982.1	-1.76152	0.971764
RCN3	-1.75002	0.789607
AC069360.1	-1.73697	1.71647
RNU1-100P	-1.73697	1.34518
FO624990.1	-1.73697	1.34518
S100A11P2	-1.73697	1.34518
RN7SL847P	-1.73697	1.19028
SFTPD-AS1	-1.73697	1.19028
AC008972.2	-1.73697	1.03857
AC093462.1	-1.73697	1.03857
AC013356.2	-1.73697	1.03857
UGT2B10	-1.73697	1.00426
AC138627.1	-1.73697	0.798823
POU3F2	-1.73697	0.798823
RN7SL204P	-1.73697	0.650195
GNRH1	-1.73507	0.587275
AC004771.5	-1.73361	0.525294
PLEKHA4	-1.73361	0.525294
GTF2IRD1P1	-1.73361	0.525294
ADH1A	-1.72583	0.549438
WT1-AS_1	-1.72583	0.549438
SLC26A7	-1.72583	0.549438
AC012464.3	-1.72583	0.549438
MIR4305	-1.72583	0.549438
MIR2052HG	-1.72583	0.549438
SNORA26	-1.72583	0.549438
GDF5	-1.72583	0.549438
LINC01630	-1.72583	0.549438
AC025271.2	-1.72583	0.549438
MIR4698	-1.72583	0.549438
MEF2B	-1.71665	0.947192
MTRNR2L10	-1.71621	0.719126
AL162258.1	-1.7137	0.529989
AC011530.1	-1.70302	1.03563
DNAJC19P7	-1.70302	0.789348
LINC01001	-1.70178	0.683476
RN7SL228P	-1.70044	1.45317
AL451064.1	-1.70044	0.989631
ANKRD20A8P	-1.70044	0.573916
PLCXD3	-1.69459	1.73067
TP73	-1.69188	1.16121
BX324167.2	-1.67807	0.630341
EPGN	-1.66985	1.82598
AC009686.1	-1.66658	0.951579
C5orf64	-1.66626	0.530301
LINC01364	-1.66626	0.530301
LYPD5	-1.66626	0.530301
LINC01832	-1.66626	0.530301
AC092354.1	-1.66626	0.530301
AC105020.6	-1.66297	0.739787
AC068580.4	-1.64599	0.575645
SLC16A8	-1.64386	1.37112
PCAT18	-1.64211	0.522732
RNA5SP256	-1.63227	1.24996
AC009065.6	-1.62902	0.518676
AC231981.1	-1.62734	0.877831
AC244250.2	-1.62149	1.09287
RNU6-733P	-1.62149	1.09287
Y_RNA	-1.62149	1.09287
OR8T1P	-1.62149	1.09287
AC087203.1	-1.62149	1.09287
HMGN2P9	-1.62149	1.09287
Y_RNA	-1.62149	1.09287
AC018765.1	-1.62149	1.09287
AL110118.1	-1.62149	1.09287
AC012362.1	-1.62149	1.09287
MIR6782	-1.62149	1.09287
RNU6-258P	-1.62149	1.09287
AC099066.3	-1.62149	1.09287
RNU6-920P	-1.62149	1.09287
SLC13A2	-1.62149	1.09287
snoU13	-1.62149	1.09287
MIR563	-1.62149	1.09287
MIR635	-1.62149	1.09287
MIR328	-1.62149	1.09287
MIR301B	-1.62149	1.09287
AC005593.1	-1.62149	1.09287
ZDHHC20P1	-1.62149	1.09287
Metazoa_SRP	-1.62149	1.09287
Z97192.1	-1.62149	1.09287
AC069304.1	-1.62149	1.09287
RNU6-549P	-1.62149	1.09287
HMGN2P34	-1.62149	1.09287
AC017079.2	-1.62149	1.09287
AC108059.2	-1.62149	1.09287
SIGLEC14	-1.62149	1.09287
AL359511.1	-1.62149	1.09287
RPL36AP35	-1.62149	1.09287
OR4K17	-1.62149	1.09287
SNORD78	-1.62149	1.09287
5S_rRNA	-1.62149	0.708972
MIR8085	-1.62149	0.708972
IGHVII-78-1	-1.62149	0.708972
AC020917.2	-1.62149	0.708972
MIR3118-1	-1.62149	0.708972
AL513533.1	-1.62149	0.708972
AL590640.2	-1.62149	0.708972
RN7SKP297	-1.62149	0.708972
RNU6-354P	-1.62149	0.708972
OLFM5P	-1.62149	0.708972
AC022509.2	-1.62149	0.708972
AC006534.1	-1.62149	0.708972
MIR1290	-1.62149	0.708972
AC068408.1	-1.62149	0.708972
AL162591.1	-1.60572	1.07313
KIF25-AS1	-1.60572	1.07313
LARGE-IT1	-1.60572	1.07313
RNU6-1206P	-1.60572	1.07313
AL451070.1	-1.60572	1.07313
AC009509.4	-1.60572	1.07313
WEE2-AS1	-1.60572	1.07313
AC113146.2	-1.60572	1.07313
SNORA62	-1.60572	1.07313
WASF1P1	-1.60572	1.07313
AL078645.1	-1.60572	0.776365
AC010733.2	-1.60334	0.564191
AC062015.1	-1.59946	1.01094
AC016866.2	-1.59946	1.01094
ANO9	-1.59946	0.802575
AC117383.2	-1.59946	0.802575
AC010997.4	-1.5961	0.92421
SLC34A1	-1.5961	0.814611
BRI3P1	-1.5961	0.814611
AC104365.2	-1.5961	0.598943
ARHGAP31-AS1	-1.59401	0.942547
RPL26P26	-1.59401	0.941313
AL445209.1	-1.59258	0.885097
GBP2	-1.58496	2.44836
PFN1P9	-1.58496	1.59077
FKBP1AP2	-1.58496	1.59077
Y_RNA	-1.58496	1.59077
AC109439.1	-1.58496	1.59077
AL512274.1	-1.58496	1.59077
AP3B2	-1.58496	0.865521
RNU6-1053P	-1.58496	0.830962
OR7E129P	-1.58496	0.830962
OR2AG1	-1.58496	0.830962
AC020779.1	-1.58496	0.830962
AL133461.1	-1.58496	0.830962
AP002340.1	-1.58496	0.830962
MIR554	-1.58496	0.830962
SNORD116-22	-1.58496	0.660471
KCTD16	-1.58496	0.604351
SNORD7	-1.58496	0.60206
AL390208.1	-1.58496	0.569024
BCL2L15	-1.5502	2.43303
PSMD5-AS1	-1.54827	0.671267
UBE2V2P3	-1.54489	0.508392
AC008011.2	-1.53766	0.710595
MAPK13	-1.53605	1.80058
TPTE2P5	-1.53051	1.18702
ADGRD1	-1.53051	1.07069
SLC9A3	-1.52947	0.50966
WDR63	-1.52947	0.50966
ZNF596	-1.52725	0.94383
AC011462.1	-1.52655	0.81581
AC013652.1	-1.52356	1.20181
RPS3AP3	-1.52356	0.929274
FRMD4B	-1.51847	1.02008
RNU6-570P	-1.51457	0.872687
ZNF585A	-1.50696	0.80414
AC005618.1	-1.5025	0.867101
Y_RNA	-1.5025	0.760984
CEACAM7	-1.50175	0.735154
Metazoa_SRP	-1.5009	0.910715
EGR2	-1.49476	0.512663
AC245033.1	-1.49476	0.512663
FAM167A-AS1	-1.48543	1.13057
C12orf75	-1.4808	1.27054
AL157400.3	-1.48063	0.911952
PATE2	-1.48063	0.832889
AC018552.4	-1.48063	0.690727
AC019129.2	-1.45943	1.34518
AC008945.1	-1.45943	1.19028
AC023481.1	-1.45943	1.12841
MIR4473	-1.45943	0.97847
RNU6-1153P	-1.45943	0.889811
TXNIP	-1.45943	0.704583
SNORA3	-1.45943	0.704583
AC116049.2	-1.45943	0.539766
TRIM32	-1.45705	2.00602
AC083900.1	-1.45403	0.811004
AC067735.1	-1.45403	0.624244
AC026746.1	-1.45372	0.516502
BARHL1	-1.45372	0.516502
AL158207.2	-1.45372	0.516502
UGT2B28	-1.45372	0.516502
LINC02158	-1.45372	0.516502
HAUS2	-1.45127	1.51297
AC124804.1	-1.44746	0.89578
AL354892.2	-1.44746	0.89578
HAVCR2	-1.44746	0.89578
AC098934.1	-1.44746	0.89578
FAM222A-AS1	-1.44746	0.831719
AC137630.3	-1.44746	0.831719
TRHDE	-1.44746	0.831719
AC093801.1	-1.44746	0.831719
RNF113B	-1.44746	0.831719
GLIPR1L2	-1.44746	0.650365
BX005019.1	-1.44746	0.650365
C4BPA	-1.44746	0.562019
HOXA7	-1.44478	0.556533
AC114801.2	-1.44057	0.780285
AL583824.1	-1.43211	0.859683
APOC1P1	-1.43211	0.859683
AC008937.2	-1.43211	0.817488
RNU6ATAC18P	-1.41504	1.20181
RN7SKP154	-1.41504	1.20181
CDC42EP3P1	-1.41504	1.20181
AQP4-AS1	-1.41504	1.00277
RNU2-58P	-1.41504	1.00277
AC090666.1	-1.41504	1.00277
AHCYP2	-1.41504	1.00277
Y_RNA	-1.41504	0.789013
RNU6ATAC7P	-1.41504	0.676298
AP000892.2	-1.41504	0.676298
Z83838.1	-1.41504	0.676298
MIR320B2	-1.41504	0.676298
TMEM133	-1.41504	0.599933
AC127002.1	-1.41504	0.555902
NECTIN3-AS1	-1.40632	0.766067
RGS7	-1.40599	0.515493
P4HA3-AS1	-1.40599	0.515493
TNFRSF9	-1.4021	1.29912
SGSM1	-1.4021	0.735296
RN7SL43P	-1.4021	0.560685
MDM4	-1.40181	1.56866
SCARNA14	-1.40136	0.844217
AC117395.3	-1.40136	0.844217
C9orf152	-1.39855	1.03451
AC138035.1	-1.39855	0.835585
CBX3P4	-1.39232	0.565306
Z69706.1	-1.38333	0.862983
AL358075.3	-1.38333	0.862983
SCARNA20	-1.38333	0.862983
TSPOAP1	-1.38333	0.862983
AC010333.2	-1.38333	0.862983
Y_RNA	-1.38333	0.862983
RNU6-1136P	-1.38333	0.862983
AC130456.2	-1.38333	0.862983
AL031584.1	-1.38333	0.828223
AC104662.1	-1.38333	0.828223
EEF1A1P39	-1.38333	0.828223
RN7SL817P	-1.38333	0.828223
KLF17P1	-1.38333	0.828223
RNU6-859P	-1.38333	0.828223
U3	-1.38333	0.828223
TERC	-1.38333	0.828223
AC020661.4	-1.38003	0.82034
GRIK2	-1.38003	0.623112
C2orf83	-1.37851	1.82598
AC019080.2	-1.37851	1.82598
AC069222.1	-1.37851	1.82598
AL357153.4	-1.37851	1.40249
AP000619.2	-1.37851	0.642997
LUCAT1	-1.36357	0.573851
AL161909.2	-1.36257	1.46038
AC020931.1	-1.36257	1.07186
AC020594.1	-1.36257	0.988326
AL109811.2	-1.36257	0.867101
MIR561	-1.36257	0.80753
B3GNT4	-1.35755	0.540745
C2orf70	-1.35509	0.824336
PCDH10	-1.35509	0.824336
MPIG6B	-1.35509	0.69662
GIPC2	-1.35509	0.593645
AC007638.2	-1.35364	0.880058
ST8SIA1	-1.35364	0.5531
LINC00886	-1.3505	1.22191
C2orf15	-1.34792	1.56365
APOBEC2	-1.34792	0.860229
RN7SL218P	-1.34792	0.548513
AP002761.3	-1.34465	0.807886
GOLGA8M	-1.34395	0.528615
AC021683.1	-1.34395	0.528615
AP003065.1	-1.34395	0.528615
PDHA2	-1.34395	0.528615
GLS2	-1.34395	0.528615
MIR126	-1.34395	0.528615
LINC01971	-1.34395	0.528615
SNORA22	-1.34395	0.528615
SPATA20P1	-1.34395	0.528615
CABYRP1	-1.34395	0.528615
MIR7845	-1.34395	0.528615
MTND5P33	-1.34395	0.528615
Metazoa_SRP	-1.34395	0.528615
DAPP1	-1.34395	0.528615
RNU7-40P	-1.34395	0.528615
MIR3157	-1.34395	0.528615
AL022067.1	-1.34395	0.528615
Z96074.1	-1.34395	0.528615
AC110053.1	-1.34395	0.528615
AL390838.1	-1.34395	0.528615
SNORD114-15	-1.34395	0.528615
UBE2Q2P9	-1.34395	0.528615
snoU13	-1.34395	0.528615
RNU7-28P	-1.34395	0.528615
COL9A3	-1.34395	0.528615
ANG	-1.34239	0.930542
ADAM1B	-1.33703	1.34407
AL158835.1	-1.33587	0.540385
SAPCD1	-1.33151	0.834206
ICAM1	-1.32193	1.4978
AL359715.5	-1.32193	1.33861
AL592490.1	-1.32193	1.27927
MIR5088	-1.32193	1.07585
AC023043.3	-1.32193	0.989631
ZFP42	-1.32193	0.989631
MIR638	-1.32193	0.989631
AL008718.2	-1.32193	0.989631
MIR6813	-1.32193	0.989631
AC002542.1	-1.32193	0.989631
MTCO1P25	-1.32193	0.989631
RNU6-438P	-1.32193	0.989631
AF287957.1	-1.32193	0.989631
FAR2P4	-1.32193	0.989631
ZMAT4	-1.32193	0.901391
AC022400.9	-1.32193	0.865521
ARMC8P1	-1.32193	0.82888
OR2W6P	-1.32193	0.727771
AP001094.1	-1.32193	0.60206
AC105749.1	-1.32193	0.60206
Metazoa_SRP	-1.32193	0.60206
CYCSP40	-1.32193	0.60206
Metazoa_SRP	-1.32193	0.60206
AC010201.1	-1.32193	0.550174
YIPF6	-1.3208	0.599343
USP32P2	-1.31366	0.618798
AC092587.1	-1.31316	0.543125
AP001574.1	-1.30633	0.712105
TPRG1	-1.30256	0.72825
AF196972.1	-1.30203	0.784414
ZNF843	-1.29445	0.794508
AC010326.2	-1.29445	0.794508
AL513318.2	-1.29445	0.769633
LANCL3	-1.29445	0.722592
AC097478.1	-1.29445	0.629744
ZNF860	-1.29177	0.906211
COL15A1	-1.28951	0.625518
GIP	-1.28766	0.660759
FO681548.1	-1.28011	2.0128
MIRLET7F1	-1.28011	0.633587
MBNL1-AS1	-1.28011	0.589481
ZBTB43	-1.27959	1.05815
AC093330.1	-1.27753	0.814731
ADAM21	-1.27753	0.814731
AL355994.4	-1.27753	0.814731
CX3CL1	-1.27753	0.814731
RSPH1	-1.27753	0.814731
SLC25A1P1	-1.27753	0.814731
AC009656.1	-1.27753	0.814731
AC096649.1	-1.27753	0.77995
PMP2	-1.27753	0.77995
AC022079.2	-1.27753	0.77995
AC074044.1	-1.27753	0.77995
PTPRN	-1.27753	0.77995
CR381653.2	-1.27187	0.708762
NOV	-1.27009	0.571492
PDK4	-1.26918	0.80079
IL9RP3	-1.26882	0.74592
RNU6-762P	-1.26303	1.34518
AC009027.1	-1.26303	0.816199
SAR1AP2	-1.26303	0.816199
AC093367.1	-1.26303	0.798823
UGT2B11	-1.26303	0.726826
SNORD43	-1.26303	0.70658
AL137845.1	-1.26303	0.650195
AC073114.1	-1.26303	0.650195
IZUMO4	-1.26303	0.567633
ZNF547	-1.26303	0.548535
AC092718.3	-1.26129	0.73331
PCDHA5	-1.25678	1.12121
AC138150.1	-1.25664	0.7222
MKI67P1	-1.25303	0.727775
SPATA21	-1.24793	1.53973
MYH15	-1.24793	0.516469
CFAP70	-1.24393	0.891664
AL024508.2	-1.24393	0.719181
UNC5CL	-1.22556	0.722567
AC079230.1	-1.22239	1.27748
AC034229.6	-1.22239	1.27748
AC091147.1	-1.22239	1.27748
AL136221.1	-1.22239	1.27748
POM121L1P	-1.22239	1.27748
AC087762.2	-1.22239	1.27748
Y_RNA	-1.22239	1.27748
RNU2-50P	-1.22239	1.27748
MIR3662	-1.22239	1.27748
AC005077.1	-1.22239	1.27748
AL512662.2	-1.22239	1.27748
AC114737.2	-1.22239	1.27748
AL109917.1	-1.22239	1.10802
HCP5	-1.22239	0.888515
AC093414.1	-1.22239	0.888515
SNORA70	-1.22239	0.830962
AC092691.2	-1.22239	0.817626
VLDLR-AS1	-1.22239	0.81051
AC099509.1	-1.22239	0.703477
AL359091.2	-1.22239	0.703477
RNU5F-4P	-1.22239	0.703477
AC017079.1	-1.22239	0.703477
GHSR	-1.22239	0.703477
AC084262.1	-1.22239	0.703477
RNU1-89P	-1.22239	0.703477
AC023490.2	-1.22239	0.546299
RNU6-613P	-1.22239	0.546299
Y_RNA	-1.22239	0.546299
MTND3P23	-1.22039	0.729445
FXYD6-FXYD2	-1.21759	0.769055
SLC12A1	-1.21759	0.769055
AF106564.1	-1.21759	0.73691
WNT8B	-1.21759	0.73691
AATK-AS1	-1.21759	0.73691
PRRT1	-1.21759	0.73691
FAM66E	-1.21759	0.692632
MTND4P14	-1.21759	0.586708
CIDEC	-1.21412	1.17055
RNA5-8SN1	-1.21299	0.525714
RNA5-8SN5	-1.21299	0.525714
RNA5-8SN5	-1.21299	0.525714
RNA5-8SN4	-1.21299	0.525714
ITFG2-AS1	-1.2115	0.869146
SAA2	-1.20645	0.807553
AC139453.2	-1.20645	0.807553
PPP1R2P2	-1.20645	0.807553
GAPDHP32	-1.20645	0.807553
RNU2-24P	-1.20645	0.807553
RNU7-26P	-1.20645	0.807553
Metazoa_SRP	-1.20645	0.807553
ISCA1P3	-1.20645	0.807553
GAPDHP45	-1.20645	0.807553
RNU6ATAC30P	-1.20645	0.807553
AC127526.2	-1.20645	0.807553
MTND5P19	-1.20645	0.807553
Y_RNA	-1.20645	0.807553
RNA5SP469	-1.20645	0.807553
AL161449.1	-1.20645	0.807553
AC064836.2	-1.20645	0.807553
RNU6-986P	-1.20645	0.807553
AC004486.1	-1.20645	0.807553
MIR6809	-1.20645	0.807553
RPL37P10	-1.20645	0.807553
PPP1R42	-1.20645	0.807553
MIR23C	-1.20645	0.807553
RNU6-742P	-1.20645	0.807553
SNORD116-29	-1.20645	0.807553
MIR222	-1.20645	0.807553
AL117378.1	-1.20645	0.807553
AL357556.1	-1.20645	0.807553
AC010655.1	-1.20645	0.807553
MIR4304	-1.20645	0.807553
AC108215.1	-1.20645	0.807553
RNU6-244P	-1.20645	0.807553
AL137847.2	-1.20645	0.807553
MIR586	-1.20645	0.807553
AC092570.2	-1.20645	0.807553
AC009313.2	-1.20645	0.807553
AL732292.1	-1.20645	0.807553
IL23R	-1.20645	0.807553
AC008694.1	-1.20645	0.807553
AC023449.1	-1.20645	0.807553
Y_RNA	-1.20645	0.807553
MIR645	-1.20645	0.807553
ZNF439	-1.20645	0.807553
MIR548A3	-1.20645	0.807553
MTCO1P42	-1.20645	0.807553
OR4P4	-1.20645	0.807553
RNU6-1129P	-1.20645	0.807553
Metazoa_SRP	-1.20645	0.807553
MIR2467	-1.20645	0.807553
AL138895.2	-1.20645	0.807553
MIR15A	-1.20645	0.807553
AL031274.1	-1.20645	0.807553
Y_RNA	-1.20645	0.807553
AC233992.2	-1.20645	0.807553
RPS10P20	-1.20645	0.807553
AC083801.2	-1.20645	0.807553
[truncated: 32,792 more rows]

## Sheet: D_VP-PC9
gene_name	log2FC	-log10pval
GALC	-9.56975	2.22773
TLR4	-9.35926	2.84193
ANXA10	-9.28998	3.32773
HPGD	-8.9155	2.09022
PLEKHS1	-8.61005	3.11373
ZNF468	-8.52539	2.53765
CDYL2	-8.42724	2.62296
CCDC160	-7.99727	2.77507
ALDH1A1	-7.69712	2.25787
SLCO2B1	-7.66311	2.79563
TP73-AS1	-7.63664	2.72212
MUC5B	-7.55221	2.07903
ZNF888	-7.35789	1.97255
C9orf152	-7.33509	2.39499
ANKRD20A5P	-7.03127	2.29571
ERICH5	-6.98532	3.49448
PTGFR	-6.98485	2.57107
COLCA2	-6.75298	1.52603
ACKR3	-6.68275	2.18616
ZNF880	-6.65264	2.03074
PHGR1	-6.47608	3.04845
ADCY1	-6.42659	1.36576
PDLIM4	-6.39112	3.36514
CEACAM5	-6.31738	1.79484
C6orf223	-6.04808	2.38141
ZNF440	-6.00926	2.62064
KLHDC7A	-5.98943	2.22386
ZNF418	-5.97959	2.14134
ALDH3A1	-5.95121	2.58924
CP	-5.94098	1.47672
RAB37	-5.91452	1.37049
UST	-5.91203	8.30672
RBP1	-5.90381	1.94202
AC025154.2	-5.82059	2.16609
ROBO1	-5.81786	2.06998
CNNM1	-5.81353	2.20478
CXCL17	-5.70055	3.6453
ZNF607	-5.68156	3.1528
ZNF799	-5.66531	1.77518
BX255925.1	-5.65913	1.81972
CALML5	-5.64382	2.80624
AC006058.1	-5.60573	2.23567
GPX2	-5.558	2.62825
AC111149.2	-5.39604	2.42758
QPCT	-5.38507	2.68105
PRSS2	-5.29678	0.941062
PCSK5	-5.27978	2.11176
IFI44	-5.27976	2.17626
ZNF680	-5.25935	1.80801
SLC47A1P1	-5.25833	5.17628
ZNF813	-5.2439	1.95255
NYAP2	-5.22356	1.74205
LINC00944	-5.18445	2.2868
AC020928.1	-5.16994	1.75576
TNFSF12	-5.12867	3.05152
COL8A1	-5.12271	2.61972
LRRC6	-4.99144	2.22637
CEACAM6	-4.98493	2.23669
AC008703.1	-4.95147	1.88077
EYA1	-4.9463	2.52647
IFI44L	-4.93164	2.16623
ZNF254	-4.92784	4.55068
AC004990.1	-4.92378	3.09324
CDH13	-4.90686	3.57884
LRP1B	-4.90264	1.70763
LINC01559	-4.83466	2.19099
C5orf46	-4.8086	2.20758
FAM30A	-4.7921	1.28053
LINC02582	-4.77237	1.58094
IGHE	-4.76194	1.54219
SLC26A7	-4.74496	2.06909
SIX2	-4.72118	2.35637
LDB3	-4.71292	2.80842
PSTPIP2	-4.68162	1.75676
LINC00589	-4.64167	1.55453
SPTSSB	-4.63988	1.58081
AC120049.1	-4.58901	1.1563
MMP13	-4.57852	3.1154
BMP4	-4.53953	3.08967
RARB	-4.53414	1.90456
LINC00943	-4.52409	1.77487
TFF1	-4.50349	0.992897
SLC6A14	-4.46872	1.64373
CC2D2A	-4.46687	3.15954
FRMD3	-4.45325	1.69013
SH3BGRL	-4.44422	2.56862
OAS2	-4.43053	2.15845
AP002847.1	-4.41247	3.11618
SPDEF	-4.39597	2.53265
SLC5A7	-4.39504	1.65171
AXIN2	-4.37175	4.08475
SLC13A3	-4.36355	2.26367
PCSK9	-4.34689	1.68413
PRKN	-4.33091	1.94625
CYP4Z2P	-4.32513	1.86547
NCAM1	-4.32255	2.68597
LINC02234	-4.32149	1.66733
TRIM31	-4.29956	2.75915
FPGT-TNNI3K	-4.26123	1.74336
SLCO1B1	-4.24921	2.17487
AC121764.1	-4.24915	1.39453
KRT4	-4.23688	1.88464
NEURL3	-4.23392	3.61672
AC090502.1	-4.18689	1.07076
MIR4477B	-4.17199	1.79092
TRABD2B	-4.17091	1.96084
AC012254.5	-4.16991	2.86193
LINC01474	-4.16988	2.7858
TOX	-4.13759	3.05938
BPIFA2	-4.12867	2.27741
IGLON5	-4.10896	2.87552
CD3D	-4.0909	1.04826
NUAK1	-4.08992	4.84647
ST6GALNAC3	-4.08918	1.13057
LINC02387	-4.08803	1.17693
RF00019	-4.08707	1.39017
BMS1P2	-4.08579	1.69991
MEGF10	-4.08358	2.60092
NCF2	-4.05391	2.76215
BCAS1	-4.03298	1.56237
RNF165	-4.02339	1.60841
EMB	-4.02152	1.73813
BPIFA4P	-4.01019	0.988835
LINC02159	-4.00407	1.06565
AL354719.2	-3.99799	1.66279
WNT5A	-3.96128	4.85049
PID1	-3.95343	2.53934
LGALS9C	-3.94308	1.8681
MSC-AS1	-3.93585	1.65503
ERC2	-3.91369	1.22695
LINC00504	-3.91368	2.02735
MIR200C	-3.90826	1.11766
PTCSC2	-3.90696	0.99038
CTNNA3	-3.90449	2.6095
MAGEA10	-3.90161	1.05428
PARM1	-3.89615	2.00727
PDZK1IP1	-3.88607	1.2512
TMTC1	-3.85471	3.14527
SLC44A5	-3.85352	2.15438
AC024940.1	-3.84728	0.799983
AC008840.1	-3.84481	1.35875
VNN3	-3.84343	0.905218
CASC23	-3.84107	1.65102
ATP8B4	-3.83101	1.34809
SPACA6P-AS	-3.82447	1.75172
DIO3	-3.80237	2.5271
GGTLC1	-3.80023	1.38886
VSIG10L	-3.78572	3.47564
ACTBP1	-3.78322	2.23949
TMPRSS4	-3.7726	1.9799
CYP2G1P	-3.77101	1.49369
ADGRF5	-3.75211	1.03788
CALB1	-3.7464	1.85292
NPNT	-3.7199	2.97729
IYD	-3.7101	1.54593
AADACL2-AS1	-3.70538	1.13071
CYP19A1	-3.70298	1.13083
AC080037.1	-3.70087	3.2498
GAPDHP14	-3.69944	2.19359
POLN	-3.69734	1.80238
RN7SKP287	-3.69704	2.19568
AC079336.5	-3.69651	1.13758
IGSF1	-3.64918	2.47502
AC011294.1	-3.64793	1.31817
WWP1P1	-3.64223	0.923959
AL160313.1	-3.64215	1.12905
AP003072.2	-3.63923	1.35074
MAMDC2	-3.63921	1.54069
AC010735.1	-3.63764	3.20904
TCN1	-3.61249	1.97655
AC005632.3	-3.60193	2.79787
EYA4	-3.59736	2.72756
ARSJ	-3.58954	0.761411
LINC02101	-3.58641	1.17373
C4BPA	-3.58564	0.849668
AL133243.4	-3.58496	2.29323
RHOT1P1	-3.58405	0.959614
LY75	-3.56242	1.10974
BCAT1	-3.55856	1.69956
IFI16	-3.55419	1.53696
HLX	-3.54984	1.83094
CACNA2D4	-3.54527	1.59956
LGALS9B	-3.53552	2.5261
TLR2	-3.53242	1.79975
AP000688.1	-3.52662	0.958856
AC012447.1	-3.52649	1.17383
CACNB4	-3.5262	1.16428
AC092814.1	-3.52481	1.17232
	-3.52395	1.54149
AKAP14	-3.52237	2.74178
AC012254.3	-3.52173	2.30398
PPP1R14D	-3.52164	2.30637
FRY	-3.52022	2.8082
AMBP	-3.52005	2.36092
CICP8	-3.51713	0.943166
LAYN	-3.48808	4.73308
PDE4D	-3.48205	2.74884
CYP4F12	-3.47838	2.18989
RNU6-62P	-3.46155	0.772048
DYNLRB2	-3.46078	1.65016
RPL9P5	-3.46002	1.59399
HGD	-3.45993	2.93796
AC083967.1	-3.45873	1.60658
CEACAM1	-3.45793	1.73425
KRT5	-3.45763	1.42865
LINC01942	-3.45699	1.62256
VN1R48P	-3.45477	1.6223
WNT5A-AS1	-3.41536	2.45927
TNFSF10	-3.41103	3.0915
KRT18P7	-3.40246	0.839142
KRT18P15	-3.3992	1.04142
TCEAL3-AS1	-3.3955	1.60937
MBL2	-3.39391	1.21408
ZBTB12BP	-3.3901	1.34776
VSX1	-3.38084	1.92453
RASSF9	-3.37015	1.19563
IGFBP4	-3.36322	2.20609
ABCA4	-3.36231	4.00739
PRR5L	-3.35332	3.12638
RNU6-1161P	-3.33848	2.88303
EDN2	-3.32475	2.87948
AC090833.1	-3.32456	1.13048
LINC01121	-3.32439	3.30844
ERN2	-3.3206	2.57076
AC008083.2	-3.30828	1.47143
CPHL1P	-3.30109	1.71172
NRG1	-3.29745	1.18539
SIGLEC15	-3.26654	1.65101
AL121790.2	-3.26525	1.96272
AKR1C5P	-3.26302	0.907547
TECTA	-3.26123	1.82739
AQP5	-3.25182	2.05175
AL137159.1	-3.25135	1.16883
BANK1	-3.24633	2.4779
AC093227.1	-3.23767	1.84696
PART1	-3.23302	1.41691
AL356234.2	-3.21957	4.16506
SMIM15-AS1	-3.21716	1.1493
RND1	-3.21284	1.87256
ABCA13	-3.20881	1.46665
BPIFB1	-3.20118	1.83482
PSCA	-3.18491	5.6016
ABCB4	-3.17755	2.37156
AKR1B10P1	-3.17738	1.66684
LINC01605	-3.17546	1.99823
MIR4442	-3.17405	0.958221
AC104411.1	-3.17396	0.960297
RNU6-431P	-3.17203	0.804036
AC004466.1	-3.17191	1.15581
AC093388.1	-3.17179	1.15611
AC116618.1	-3.17173	0.958114
AC092718.2	-3.16776	1.93542
AC000078.1	-3.16759	2.69192
AL031719.2	-3.16756	2.11905
AC016745.2	-3.16556	0.958455
AC083862.2	-3.16544	1.93548
ANKS1B	-3.16108	0.964998
LINC02081	-3.14706	2.68512
SERPIND1	-3.1425	3.64772
IFI27	-3.13798	1.74753
AADAC	-3.12145	2.13408
LINC01402	-3.11106	0.954995
AC084032.1	-3.11094	1.27415
CHGA	-3.11076	0.801451
AL133163.1	-3.10894	0.953952
AC093833.1	-3.10888	1.27245
AC013444.1	-3.10771	2.62249
MCM8-AS1	-3.10659	1.90137
SLC10A1	-3.10647	0.878209
MSN	-3.0949	2.33558
MMP7	-3.08806	1.33508
NRSN2	-3.0762	3.33892
KCNQ3	-3.0744	1.81113
SPACA6	-3.04072	2.61572
GAS2	-3.03683	1.8528
BMPR1B	-3.03179	1.83166
BX322650.1	-3.02649	1.70211
NR0B1	-3.01314	1.88773
FN1	-3.01109	2.61484
AL355922.2	-3.00658	0.701693
TMEM225B	-3.00638	0.963602
DUTP2	-3.00631	0.909916
AC018752.1	-3.00631	0.909916
RNA5SP39	-3.00407	1.03058
AC022306.3	-3.00399	0.909793
OR11H7	-3.00386	0.701635
RTL9	-3.00374	0.700583
AC091167.4	-3.00169	1.27702
SAA1	-3.00113	1.17316
VN1R51P	-2.99931	1.56093
PDZD9	-2.99925	1.28067
SCARNA21	-2.99912	2.42171
AL365217.1	-2.99905	1.28105
RPS4XP1	-2.99904	0.799302
PADI6	-2.99687	0.963043
AL449423.1	-2.9968	1.29068
AC008883.2	-2.9968	2.42005
GPC3	-2.9968	2.42005
AC091182.2	-2.9968	2.42005
AC105036.3	-2.99673	1.59679
LINC01762	-2.99441	1.59674
RF00019	-2.99435	1.29071
AL138759.1	-2.99435	1.29071
AL355483.3	-2.99427	1.04007
ADAMTSL3	-2.99319	1.24938
AC092666.1	-2.99202	1.03997
DDX11L10	-2.98513	0.915091
SERPINB5	-2.97631	2.31158
ABCA10	-2.97108	0.88289
RNF43	-2.96835	3.17348
SEMA3E	-2.96708	1.7769
IGSF11	-2.96545	2.07537
IGFBP5	-2.95965	3.3895
SAA2	-2.94611	2.40383
SNX18P1Y	-2.94315	0.960098
HNRNPA1P22	-2.94308	0.90645
SH2D4B	-2.93827	1.5603
CYP3A4	-2.93609	0.903547
IFNA1	-2.93347	1.49224
AC116666.1	-2.93343	1.28823
PNRC2P1	-2.93343	1.28823
SERPINB4	-2.9277	1.2959
TMEM171	-2.92515	3.45633
MAGI2	-2.92023	4.16815
SAA4	-2.91878	1.30917
SOX6	-2.91299	2.12871
TMEM145	-2.90638	1.36491
SLC43A3	-2.90301	1.95718
AC006058.3	-2.90195	1.87677
TNFRSF18	-2.89017	2.66796
AC107067.1	-2.88625	1.56343
ADAM20P3	-2.883	4.35783
TNFRSF14	-2.88054	3.89058
LY9	-2.87958	2.65725
VNN2	-2.87614	0.832934
AC009119.1	-2.87608	1.29847
PRKXP1	-2.87485	2.5181
SEMA6A	-2.87248	2.58945
TNFRSF14-AS1	-2.85905	1.89426
AC002525.1	-2.85438	1.40903
CYP2T1P	-2.85034	2.7258
AL118522.1	-2.84234	2.31943
GPD1L	-2.84193	2.49032
LINC02474	-2.84095	1.13141
LPAR1	-2.84067	3.2225
GLIS1	-2.84025	2.36641
AC005632.4	-2.83973	2.16913
PRSS12	-2.83357	3.14696
DOCK10	-2.83147	2.96383
SERPINB3	-2.82826	3.18221
CYP2B7P	-2.82461	3.45451
GLDN	-2.81662	2.52345
CXCL1	-2.81632	2.94848
LINC01768	-2.8137	0.933269
LINC02067	-2.81153	0.822759
LINC01468	-2.81138	1.80299
OR7E39P	-2.81138	0.933118
AC103591.3	-2.81138	0.933118
MIR6081	-2.81122	0.705533
AL391117.1	-2.81115	0.617718
AL583722.4	-2.81114	0.868332
AC007552.1	-2.81091	1.15238
LINC02015	-2.80953	3.16018
FRG1KP	-2.80834	1.15178
HSPA2	-2.80822	2.68451
MIR6772	-2.80819	2.16726
HMGN2P28	-2.80603	1.15163
HS6ST1P1	-2.80603	1.15163
AC009303.2	-2.80572	0.820094
FCF1P7	-2.80572	0.820094
TRPA1	-2.80539	1.42207
AP000439.2	-2.80463	1.32742
AL606469.1	-2.80438	1.66602
NANOGNBP3	-2.80315	2.2004
COL2A1	-2.803	0.930846
SLC6A7	-2.80295	1.47115
SRP68P3	-2.80259	0.934119
TLR10	-2.80126	0.956169
AC024257.4	-2.80035	1.16579
BMPR1B-AS1	-2.80001	0.824598
AL031289.1	-2.79769	0.824457
RPSAP13	-2.79753	0.82438
CYP4F3	-2.79359	3.35084
IGSF10	-2.79178	1.93534
LINC01522	-2.7887	1.81613
RDH10-AS1	-2.78683	2.99717
AC136443.1	-2.77228	1.50459
SDCBP2	-2.7618	2.50703
CYP4X1	-2.76085	1.83942
RNU1-67P	-2.75039	0.819135
AC100778.2	-2.74783	1.14768
FAM182A	-2.74775	1.4044
LINC01208	-2.74628	1.19473
AC011604.2	-2.74504	2.1229
MTND4P9	-2.74496	2.12378
AL110118.2	-2.74496	2.12378
AC006030.1	-2.74488	1.14781
VN1R108P	-2.74232	1.41695
DRAIC	-2.74224	2.1524
AL512622.1	-2.74224	2.1524
RN7SKP70	-2.74216	1.41732
LRRC17	-2.74208	0.926736
AP001972.4	-2.73959	0.929899
RNU4-78P	-2.73678	0.820657
RF00019	-2.73678	0.820657
GALNT15	-2.7362	2.15497
MAP2	-2.73544	2.48263
HMGN2P4	-2.73396	0.702703
AC090772.3	-2.7209	2.01869
RGCC	-2.71416	2.22124
AC007785.1	-2.70852	1.53279
LRRC4	-2.70735	2.27838
BPIFA1	-2.70595	1.53978
KRT3	-2.70372	2.15165
AL442128.2	-2.69491	1.05894
AC090579.1	-2.69327	1.10235
ZNF469	-2.68718	3.84472
ZG16	-2.68308	2.43517
ESRRB	-2.68118	1.45185
CEMIP	-2.67863	3.01865
TMEM71	-2.6758	2.45624
LINC01269	-2.67081	3.28296
CCDC196	-2.67045	1.68319
AC130456.1	-2.66887	1.69178
AC104964.1	-2.66781	3.07975
TGFB2-AS1	-2.66458	2.64661
AKR1C1	-2.65934	2.10669
PELI2	-2.65627	2.42734
SLC4A11	-2.6474	2.86626
AC125494.1	-2.63756	1.24266
AC008537.4	-2.62104	1.35537
SNTB1	-2.6209	1.25335
PCDHGA2	-2.6194	2.09753
VSTM2L	-2.60173	2.12709
ZCCHC24	-2.59747	3.124
MEF2C	-2.59588	4.03518
FLG	-2.59582	2.31848
LARGE1	-2.5932	1.91435
AC090241.3	-2.59161	0.608039
PCAT1	-2.59143	0.849309
AC013444.2	-2.59143	0.849309
SDCBPP3	-2.59134	0.935794
TRDC	-2.59125	0.849435
AL158201.1	-2.59125	0.849435
IDSP1	-2.59116	0.710725
OR7E157P	-2.59116	0.710725
AC112496.1	-2.58911	0.849131
AC002075.1	-2.58902	0.935601
CPNE6	-2.58902	0.935601
RPA4	-2.58884	0.710581
HSP90AB2P	-2.58836	0.709118
RF00422	-2.58827	0.932573
GPR34	-2.58818	1.37622
NCOA7-AS1	-2.58791	0.709128
TEX52	-2.58779	1.5911
PAPPA2	-2.58693	1.329
AC144548.1	-2.58595	0.932379
MIR5194	-2.58586	1.37591
C1QBPP2	-2.58586	1.37591
RF00026	-2.58586	1.37591
AC015802.6	-2.58568	0.932594
WARS2-IT1	-2.58568	0.932594
ITGB5-AS1	-2.58559	0.708985
AC092127.2	-2.58548	1.10456
BLZF2P	-2.5853	1.46401
AC092919.1	-2.58505	1.03022
AC093462.1	-2.58501	1.38001
ROR1-AS1	-2.58501	1.38001
ASB12	-2.58492	1.72506
RRN3P2	-2.58492	1.72506
KRTAP9-12P	-2.58492	1.72506
NPAS3	-2.58483	1.38061
AC073320.1	-2.58483	1.38061
DFFBP1	-2.58483	1.38061
AC127070.4	-2.5826	1.72347
RF00019	-2.58251	1.38029
AC016866.3	-2.58246	1.03021
AC099066.2	-2.58197	1.82994
AC093159.1	-2.58174	1.39785
AL627309.1	-2.58165	1.39797
AKR1B10	-2.58088	2.34824
TTLL11-IT1	-2.57942	1.39751
IGLL3P	-2.57924	0.934736
AL355987.5	-2.57913	1.11383
RF00017	-2.57846	0.940502
AC074044.1	-2.57846	0.940502
LINC01925	-2.57837	0.850849
KBTBD12	-2.57837	0.850849
AC011352.3	-2.5773	0.934141
MUM1L1	-2.57542	2.33337
PTGS1	-2.57502	2.99989
AC009095.1	-2.57391	1.38774
AC093763.1	-2.5729	1.5339
	-2.57178	3.2072
ITGA11	-2.56906	1.17516
TSPAN1	-2.56741	2.91419
SPANXB1	-2.56406	1.21253
KCNJ13	-2.55695	1.56353
AC024267.3	-2.55459	2.1457
AC008494.3	-2.5545	1.4626
ANKRD35	-2.55399	4.27268
KCNMA1	-2.55005	0.900909
AC016396.1	-2.54973	1.49294
AL512303.1	-2.54814	1.11538
EDIL3	-2.54624	1.5907
LEF1	-2.54512	2.09285
HIGD1B	-2.54282	1.98216
CPS1	-2.54076	1.97672
LIX1-AS1	-2.53637	1.8424
LOXL1	-2.52698	4.92714
TRIM31-AS1	-2.52549	1.27825
B3GALT2	-2.52504	0.927096
AL031118.1	-2.52486	1.36728
AC133555.4	-2.52468	0.705115
RNU6-322P	-2.52346	1.76975
AC068880.4	-2.52187	0.841326
PCDHB18P	-2.52178	1.37043
AC097065.2	-2.52169	1.68174
RPL7P32	-2.52169	1.68174
AC090772.1	-2.5216	1.37101
TMEM98	-2.5216	1.37101
IL36G	-2.5216	1.37101
CTSC	-2.51925	2.13735
AC105001.1	-2.51851	1.38778
PPARGC1A	-2.51842	1.3879
AC079354.1	-2.51833	0.929396
LRRC26	-2.51777	1.04775
PLCL2	-2.51479	3.8668
DOCK2	-2.50167	2.65033
ABCC4	-2.50164	3.11427
CILP	-2.5016	1.66539
AC006557.1	-2.50122	1.45754
LINC01393	-2.50114	2.36541
AL359715.3	-2.49409	4.02923
FIRRE	-2.49304	2.19903
ZBTB7C	-2.49082	2.13414
TARID	-2.49021	2.54853
TTC6	-2.4886	2.41437
AC025539.1	-2.48831	1.41297
LINC00607	-2.48723	3.02892
AC131392.1	-2.48305	1.31534
IGFL2	-2.48183	2.64863
PCLO	-2.47599	2.92406
COX16	-2.46689	2.46912
CRLF2	-2.46446	1.69451
TRAM1L1	-2.46417	1.2214
CYP4F2	-2.46127	0.975095
PRSS51	-2.46061	1.76748
FOXD4L1	-2.46051	1.76819
WFDC21P	-2.45901	2.35521
AC027601.2	-2.45892	1.0845
UNC5B-AS1	-2.4576	1.02556
RPSAP72	-2.45721	2.39904
BACH1-AS1	-2.45714	1.15794
SLC6A20	-2.45631	0.860326
AL390208.1	-2.45415	1.22905
AC104809.2	-2.45352	0.993419
CORIN	-2.44745	1.88158
AMY2B	-2.44077	1.05077
ZSCAN31	-2.43993	2.10454
LIN7A	-2.43761	1.24398
CYBA	-2.43555	2.15573
AC055855.1	-2.43052	0.815663
AC115618.1	-2.43047	0.972317
IL16	-2.43018	0.815764
TNKS2-AS1	-2.42934	0.972212
CR589904.1	-2.42874	0.936542
DANT2	-2.42855	1.82663
AC097634.1	-2.42761	1.14699
EIF1P6	-2.42701	0.855615
AC027288.1	-2.42681	2.79303
EML5	-2.42599	2.52141
PRDM6	-2.42576	1.62708
MDGA1	-2.42045	1.74952
AC108673.3	-2.41621	1.38278
CES1P2	-2.41512	1.4703
VILL	-2.41506	4.00772
AC099343.2	-2.41457	1.99101
AC084026.1	-2.40822	1.7343
MIR6512	-2.40256	0.910526
AC104534.1	-2.39738	1.72523
PHACTR3	-2.39574	1.67713
GCNT3	-2.39498	1.24208
AC093458.2	-2.39445	1.91509
PCDHA7	-2.3925	2.53064
NID2	-2.39121	1.5964
MIR5581	-2.39045	1.21763
SIDT1	-2.38804	2.21011
BEND3P3	-2.38793	2.46842
KRT17	-2.38071	2.77711
AP000523.1	-2.37873	1.28561
AC023632.2	-2.37583	1.20493
AL080312.2	-2.37299	1.98451
KCNJ18	-2.37295	2.58059
OASL	-2.37196	2.15628
AL592148.2	-2.36978	2.03512
AC008752.3	-2.36831	2.44385
UNC5C	-2.3602	2.885
CFAP61	-2.35789	3.51945
LINC01721	-2.3551	3.28663
AC087752.4	-2.34368	2.25637
LINC02060	-2.3425	1.49273
SDK1	-2.34018	1.3404
CTAGE7P	-2.33731	1.46259
TMEM150C	-2.3342	2.53629
AC092431.1	-2.32858	0.59418
OTX2	-2.32847	0.717126
KLF1	-2.32836	0.875663
IL1RL2	-2.32828	1.20664
AC067817.2	-2.32825	0.875765
LINC01484	-2.327	1.80103
RPS15AP16	-2.32594	0.875512
CLDN2	-2.3253	0.990345
CHRDL2	-2.32456	1.05764
AL031710.2	-2.32456	1.05764
AC072022.1	-2.32446	1.61655
TAS2R8	-2.32446	1.61655
AC073136.2	-2.32446	1.61655
HIST1H1D	-2.32446	1.61655
AL160408.5	-2.32435	1.05798
RN7SL724P	-2.32435	1.05798
PKNOX2	-2.32435	1.05798
AC027020.1	-2.32424	0.715224
AC092920.1	-2.32244	1.40251
AL445189.2	-2.32235	0.715026
ZSCAN4	-2.32214	1.61509
AC099329.1	-2.32214	1.61509
AL033384.1	-2.32214	1.61509
PTX4	-2.32203	1.05764
CPEB2-AS1	-2.32192	0.715036
SLCO1A2	-2.32188	1.54419
MAB21L3	-2.32078	1.61184
AC074050.4	-2.32076	0.872809
AC006028.1	-2.32076	0.872809
AC138645.1	-2.32065	1.62882
AC084757.2	-2.32054	1.62918
TNRC18P1	-2.32054	1.62918
CKS1BP1	-2.32054	1.62918
UBE2L4	-2.32054	1.62918
AC022075.1	-2.32054	1.62918
IQSEC3P1	-2.32043	0.872831
YBX3P1	-2.32043	0.872831
FTH1P4	-2.32043	0.872831
AC022509.2	-2.31949	1.51765
AC036108.1	-2.31833	1.62729
SLC31A1P1	-2.31833	1.62729
ATP5MC1P6	-2.31822	1.62765
LINC00310	-2.31822	1.62765
AC026254.2	-2.31822	1.62765
CXCL11	-2.31683	0.876498
LYZL1	-2.31661	0.876419
AC130651.1	-2.3144	1.06994
BTLA	-2.3144	1.06994
CD200R1L	-2.3144	1.06994
AL355482.2	-2.3144	1.06994
MSMB	-2.31433	3.35437
AC023632.1	-2.31429	0.876162
FAM83F	-2.31429	0.876162
HTRA4	-2.31289	0.717564
AL357153.2	-2.31278	0.717509
HIST2H3D	-2.31047	0.717317
MYL12BP1	-2.31047	0.717317
RNU6-8	-2.30995	1.47144
KCNJ12	-2.30891	1.85435
POU5F1B	-2.30705	0.82826
AC015909.5	-2.30531	3.6752
SAMSN1	-2.30484	1.0082
DNAJC12	-2.30427	1.30253
STAM-AS1	-2.30326	3.08217
STXBP5-AS1	-2.30303	1.54464
C12orf75	-2.30187	1.26419
RAD21-AS1	-2.30151	1.54455
SEMA6A-AS1	-2.30115	1.00589
AL136038.5	-2.30084	1.34747
CFAP161	-2.29636	1.57831
SSTR5	-2.29495	1.29642
RBP4	-2.29294	2.35679
ZBED6CL	-2.29103	1.8985
LINC01983	-2.29094	2.00738
AL024508.2	-2.29035	2.13435
AL359711.2	-2.28874	1.12375
AL136164.3	-2.28623	1.69082
AC063944.3	-2.28487	0.871723
IGFL1P1	-2.28436	1.91231
SPOCK1	-2.27978	2.20706
RHOQP1	-2.27572	1.20782
KLHL4	-2.27034	1.29389
RNU6-951P	-2.26535	0.590425
RF01210	-2.26508	0.902472
KRTAP5-8	-2.26502	0.868637
LINC02038	-2.26492	0.711911
EFL1P2	-2.26228	1.9511
AC092155.2	-2.26144	0.709939
AC079203.1	-2.26133	1.04784
RNU1-73P	-2.26133	1.04784
AC008243.1	-2.26123	1.57547
BPIFC	-2.26117	1.37821
CPQ	-2.26112	1.04817
MAP1LC3A	-2.26112	1.04817
MTND1P14	-2.26112	1.04817
PM20D1	-2.26101	0.709946
LINC01429	-2.26101	0.709946
HMGB1P14	-2.25938	1.37968
AC027020.2	-2.25852	1.3775
ZFX-AS1	-2.25742	1.58569
AC090589.2	-2.25731	1.58598
AP001442.1	-2.25731	1.58598
C14orf37	-2.25731	1.58598
AC113382.1	-2.2572	0.865664
IFNE	-2.2561	2.47708
AC104793.1	-2.25355	0.996276
TTC3-AS1	-2.25338	0.86917
GRB10	-2.25051	1.15327
SUCNR1	-2.24963	1.5571
AC073130.3	-2.24955	0.712138
NPM1P37	-2.24955	0.712138
AF129075.1	-2.2482	1.7423
PLEKHF1	-2.24784	2.292
IPCEF1	-2.24344	1.73941
RGS2	-2.23662	2.5469
AGAP1-IT1	-2.23516	1.86962
SLC39A2	-2.23496	2.32101
TDH	-2.23417	1.76754
ZNF568	-2.22133	1.27625
SALRNA1	-2.2183	1.04873
C11orf86	-2.21767	2.02008
FAM172BP	-2.21713	0.932917
MX2	-2.21624	1.32244
EEF1DP3	-2.21331	1.26576
LRP8	-2.2126	2.14305
GSDMC	-2.19673	2.65753
Z83851.1	-2.19669	1.84048
PGM5	-2.19616	1.25162
AL163952.1	-2.19611	1.99906
MBNL3	-2.19569	2.44372
MAML3	-2.18679	5.17205
SMC1B	-2.18209	1.21703
C9orf66	-2.1794	1.18843
AL359183.1	-2.17935	3.65784
RP11-211G3.2	-2.1772	1.91542
AL035461.2	-2.17405	0.877797
AL033527.3	-2.17301	1.16926
PXDNL	-2.17033	1.88081
AL132656.2	-2.16956	2.71374
ADAMTS12	-2.16834	1.86181
LINC01913	-2.16774	0.806384
AC100847.1	-2.1666	1.77518
AC115989.1	-2.16498	1.12031
RERG	-2.16255	1.69686
AL139011.1	-2.1623	0.883953
NCMAP	-2.16106	2.47853
AL590133.1	-2.15889	0.720763
AL355916.1	-2.15471	1.22412
LYG2	-2.15269	2.58971
OSGIN1	-2.1507	1.64469
CEP85L	-2.15003	3.78538
AC007681.1	-2.14875	2.27266
ISPD	-2.14336	2.82842
HSPE1P3	-2.14312	0.808228
BDNF	-2.14181	2.10247
PITRM1-AS1	-2.14117	2.97643
SPATA9	-2.14111	1.11065
NHLH1	-2.1366	0.805201
TUBA3E	-2.13242	1.06438
AC006299.1	-2.13242	1.06438
LY96	-2.13121	2.39852
CYP2C8	-2.13074	2.11342
ZNF700	-2.12437	4.5604
CABYR	-2.12294	2.33461
AJ239328.1	-2.1227	1.44935
LINC02492	-2.12248	2.6518
AC016866.1	-2.11959	1.22744
SNORD69	-2.11793	0.740694
S100A8	-2.11501	1.55617
CDKN2A-AS1	-2.11369	2.22726
CTSO	-2.11323	1.62372
SGCB	-2.11305	2.89749
PGC	-2.11204	1.64411
LIPM	-2.11189	3.69524
AC093001.1	-2.11166	1.45105
CLIC2	-2.10906	2.35101
LINC01539	-2.10888	1.14906
SMAD6	-2.10521	1.74895
COL24A1	-2.10453	1.48823
AC114939.1	-2.10444	1.34999
ZNF829	-2.10278	2.66959
TMEM92	-2.09975	4.04139
FSTL5	-2.099	1.85031
GABRE	-2.09865	2.70989
PCDHB10	-2.09376	2.28213
TM4SF18	-2.09305	2.15247
SEMA5A	-2.08926	3.2964
AC093249.6	-2.08745	1.41551
SLC49A3	-2.08742	3.18986
AC068647.2	-2.08569	2.98516
AC100860.1	-2.0837	1.91309
FOXA1	-2.0828	3.94557
AC083902.2	-2.07815	2.5519
IRX3	-2.07765	6.31318
IQGAP2	-2.07583	0.810111
AL157935.1	-2.07426	3.13967
CCL17	-2.07147	1.59682
AC027288.3	-2.07098	2.27006
TMEM173	-2.0702	2.905
CLU	-2.06833	2.25561
AC006460.1	-2.06678	0.984204
AL160408.3	-2.06241	1.38565
C3	-2.05705	2.46298
FOXJ1	-2.05637	3.09955
CYP8B1	-2.05608	1.99553
LINC02334	-2.05263	1.41933
ACPP	-2.05231	1.68179
VEGFC	-2.04208	2.41796
SYTL2	-2.04185	2.67612
PLA2G10	-2.04123	2.97167
AR	-2.04046	2.09119
ALCAM	-2.03917	3.10172
UGDH	-2.03897	1.99483
AC004466.3	-2.03779	0.97901
LINC00271	-2.03421	1.55036
RNASE1	-2.03133	1.74822
CAMK1D	-2.03007	2.34571
AC005632.1	-2.02324	1.71207
AL365203.2	-2.02273	1.86436
CAPN13	-2.0224	2.47269
SMIM10	-2.01639	2.22477
DCLK2	-2.01535	1.46256
UNC5B	-2.01345	5.06853
MIR200A	-2.01295	3.03886
CPNE5	-2.01049	1.10893
THBD	-2.0068	1.14431
AC008985.1	-2.00651	0.723656
AL589843.1	-2.00651	0.723656
AC027237.2	-2.00651	0.723656
CYYR1	-2.00651	0.723656
TAS2R13	-2.00651	0.723656
AC011443.1	-2.00638	0.864547
CSRP3	-2.00638	0.864547
AC092354.1	-2.00625	0.72373
AC108693.1	-2.00625	0.72373
AL671986.1	-2.00625	0.72373
RPL21P127	-2.00625	0.72373
GAPDHP16	-2.00625	0.72373
AL365295.1	-2.00612	1.87427
AC089998.3	-2.00611	0.573042
LINC00518	-2.00611	0.573042
CYP4A22	-2.00611	0.573042
ESRRG	-2.00611	0.573042
LARP4P	-2.00611	0.573042
TRPC7-AS1	-2.00509	0.728153
C7	-2.00433	0.572911
PCDHGC4	-2.00433	0.572911
LPAR3	-2.0042	0.723379
AC010320.2	-2.0042	0.723379
AC099518.2	-2.0042	0.723379
AC092338.2	-2.0042	0.723379
FAM221B	-2.00406	0.864149
AC064836.1	-2.00406	0.864149
TBL1XR1-AS1	-2.00406	0.864149
RN7SL76P	-2.00393	0.723453
DMD	-2.00393	0.723453
AC018410.2	-2.00393	0.723453
KIAA1614-AS1	-2.00393	0.723453
AL121877.1	-2.00379	0.572871
PCDHA10	-2.00379	0.572871
AL359317.1	-2.00189	0.636528
HIST1H4D	-2.00177	0.721215
AL355483.2	-2.00177	0.721215
RF02271	-2.00177	0.721215
AC010240.2	-2.00177	0.721215
CU633906.1	-2.00163	1.29137
SCUBE1	-2.00163	1.29137
AC245884.10	-2.00163	1.29137
RN7SL559P	-2.0015	1.29173
AC103702.1	-2.0015	1.29173
SLX1B-SULT1A4	-2.0015	1.29173
AP001619.2	-2.0015	1.29173
AP003354.2	-2.0015	1.29173
AC121758.1	-2.00136	0.72122
AL132765.2	-2.00136	0.72122
AC073111.1	-2.00136	0.72122
AC234781.5	-2.00136	0.72122
RPL3P13	-2.00136	0.72122
LINC01447	-2.00095	0.845269
AL137127.1	-2.00072	1.41404
AC078881.1	-1.9995	1.15173
USP41	-1.99945	0.720939
DUTP1	-1.99931	1.29
AC008883.1	-1.99931	1.29
AQP9	-1.99931	1.29
AC009630.1	-1.99931	1.29
AC022509.4	-1.99931	1.29
FGF7	-1.99931	1.29
AC091826.2	-1.99931	1.29
NPM1P29	-1.99931	1.29
AL137024.1	-1.99931	1.29
LRRD1	-1.99931	1.29
TRPV5	-1.99918	1.29036
AL672291.1	-1.99918	1.29036
RTN1	-1.99918	1.29036
TSNAX-DISC1	-1.99918	1.29036
HDHD5-AS1	-1.99918	1.29036
CTNND2	-1.99918	1.29036
AC011752.1	-1.99918	1.29036
RPL29P3	-1.99904	0.720943
TTBK1	-1.99904	0.720943
RNU6-10P	-1.99904	0.720943
SNORD14E	-1.99904	0.720943
HHLA2	-1.99816	0.820191
AC011676.5	-1.99802	2.18754
HAAO	-1.99796	2.1884
AL954705.1	-1.99796	2.1884
BHLHE41	-1.99699	5.46917
HNRNPRP1	-1.99687	0.862868
AC027796.1	-1.99687	0.862868
AC025678.3	-1.99687	0.862868
LINC02274	-1.99687	0.862868
RF00019	-1.99687	0.862868
OMP	-1.9968	1.1294
AC087301.1	-1.99673	1.30421
MIR4672	-1.99673	1.30421
CT55	-1.99673	1.30421
AL078587.1	-1.99673	1.12238
AL356740.2	-1.99667	1.5824
RN7SL838P	-1.99659	0.862823
AC097376.1	-1.99659	0.862823
AC055876.2	-1.99659	0.862823
PPM1AP1	-1.99608	1.16959
AC097347.1	-1.99564	1.16302
U73169.1	-1.99441	1.30277
AC146944.2	-1.99441	1.30277
ERBB4	-1.99441	1.30277
AC010203.2	-1.99441	1.30277
AL021707.1	-1.99441	1.30277
AC012354.3	-1.99441	1.30277
HIGD1AP14	-1.99428	0.862421
ODAM	-1.99428	0.862421
AC242376.1	-1.99428	0.862421
DOCK9-AS2	-1.99386	2.20547
RARRES1	-1.99304	1.50105
SMCR5	-1.99195	0.723896
PTPN22	-1.99195	0.723896
AL136038.3	-1.99195	0.723896
ACTG1P22	-1.99181	0.723826
MIR181B2	-1.98963	0.723614
AC122134.1	-1.9895	0.723544
AL049697.3	-1.9895	0.723544
AC018511.1	-1.9895	0.723544
AL160408.6	-1.9895	0.723544
AL157791.1	-1.98872	0.67462
GAS2L1P2	-1.98702	0.571624
AC021678.1	-1.98702	0.571624
NMRK2	-1.98702	0.571624
AL512791.1	-1.986	1.52205
MACROD2	-1.98586	1.81131
PLGLB1	-1.9844	1.18894
AC090409.1	-1.98346	0.955183
NF1P12	-1.98183	1.26962
AC008760.2	-1.98167	1.43853
ANKK1	-1.98142	0.93961
BBOX1-AS1	-1.98084	0.746531
NCCRP1	-1.98061	5.79236
AC097534.1	-1.98012	1.29339
STS	-1.97978	3.12175
SEMA3C	-1.97969	3.94478
SLC2A9	-1.97926	0.839205
MUC5AC	-1.97859	1.40884
AC003956.1	-1.97785	1.74773
AC114730.3	-1.97781	7.72814
GPR137C	-1.97692	1.81057
LINGO2	-1.97442	0.866908
TNFRSF11B	-1.97399	1.98694
SERPINE2	-1.9722	6.18887
AL132639.3	-1.97211	0.926163
UBE2R2-AS1	-1.97205	1.14684
NUFIP1P	-1.97198	1.14708
SMC2-AS1	-1.97184	0.749161
AC027045.2	-1.97131	0.844739
AL358075.1	-1.97098	0.926003
MSTN	-1.97034	0.937386
TNIK	-1.97023	3.69295
AL591623.1	-1.96947	0.925304
MANSC4	-1.96879	2.92933
LAGE3P1	-1.96602	2.15898
UGT1A3	-1.96602	2.15898
AL158163.1	-1.96572	1.37252
AC139795.3	-1.9655	1.17466
LINC02568	-1.96477	1.43244
AC018868.2	-1.9647	1.15818
WDR86	-1.96357	1.15799
FLRT3	-1.96268	1.25366
C8orf37-AS1	-1.96231	0.933684
PRR22	-1.96154	1.83975
CFAP65	-1.95992	1.26628
RPL31P59	-1.95749	1.71242
KYNU	-1.9563	3.81591
TAS2R4	-1.95457	3.59628
FAM161B	-1.95203	2.02241
LINC00115	-1.95109	1.74406
AC083841.4	-1.95034	0.845728
C20orf196	-1.95021	3.41923
MAPK10	-1.94961	1.42664
BST1	-1.94937	1.70703
ACSS1	-1.94605	2.70769
ARHGAP18	-1.94557	1.75315
IRX5	-1.94474	2.68486
AC104076.1	-1.94342	0.568309
CRYZL2P-SEC16B	-1.94342	0.568309
AC106900.1	-1.94328	0.71588
HOXA7	-1.94328	0.71588
RNU2-51P	-1.94328	0.71588
FOXP1-IT1	-1.94328	0.71588
LRRC3-AS1	-1.94328	0.71588
HMGN1P7	-1.94315	0.853288
AC068768.2	-1.94315	0.853288
AC008629.1	-1.94315	0.853288
AC009690.2	-1.94302	0.71595
AL591767.3	-1.94302	0.71595
OGN	-1.94302	0.71595
AC015961.1	-1.94302	0.71595
RF00019	-1.94302	0.71595
RPL23AP17	-1.94302	0.71595
AP001350.2	-1.94299	2.10556
AL133371.1	-1.94288	0.568268
DGAT2L6	-1.94288	0.568268
AC020634.1	-1.93854	0.713446
AL589182.2	-1.93854	0.713446
GGNBP1	-1.9384	1.25323
RPL15P2	-1.9384	1.25323
AC011933.3	-1.9384	1.25323
PBOV1	-1.93827	1.25354
RNU7-84P	-1.93827	1.25354
AC099795.1	-1.93827	1.25354
KCNJ9	-1.93813	0.713446
FGF13	-1.93813	0.713446
BAALC-AS2	-1.93813	0.713446
CYP4F8	-1.938	1.21861
AC073127.1	-1.93694	1.86685
SAP18P3	-1.93364	0.851481
AC007673.1	-1.93364	0.851481
RF00012	-1.93364	0.851481
AL391421.1	-1.9335	1.26406
AC012254.4	-1.9335	1.26406
AC008494.2	-1.9335	1.26406
TAS2R50	-1.9335	1.26406
AC026367.2	-1.93337	0.851433
LRTM2	-1.93337	0.851433
AC005786.2	-1.93337	0.851433
MYOG	-1.93337	0.851433
VCX3B	-1.93337	0.851433
AC008622.1	-1.93337	0.851433
LRMP	-1.93337	0.851433
VCX2	-1.93337	0.851433
RNU6-1209P	-1.93337	0.851433
FADS2	-1.93316	1.78296
AC126474.1	-1.93269	1.45258
KRTAP5-7	-1.93104	0.915303
PDZK1	-1.93076	2.66229
BARHL1	-1.92872	0.715969
C3orf30	-1.92872	0.715969
AC103681.2	-1.92858	0.715899
AC099521.2	-1.92858	0.715899
AC013726.1	-1.92858	0.715899
AC025627.1	-1.92806	2.42355
SGK1	-1.92752	3.03832
RPL23AP88	-1.92379	0.566781
KCNV2	-1.92379	0.566781
NRCAM	-1.92201	2.3996
BICDL1	-1.92111	2.69634
LY6D	-1.92009	2.79848
FAM237B	-1.91852	1.15322
TSC22D1-AS1	-1.91688	1.45129
SCNN1G	-1.91396	1.74755
GJC2	-1.90822	2.61829
TBX15	-1.90487	1.74794
AC026367.1	-1.90431	1.20823
DAPK2	-1.90149	2.09787
C2-AS1	-1.89988	1.74049
U62317.3	-1.89868	1.70986
ZG16B	-1.89828	2.66919
SPARCL1	-1.89731	2.57802
FAM198A	-1.89368	1.15695
SETBP1	-1.89347	2.67561
SLC12A2	-1.89211	3.29672
CSAG4	-1.89075	1.73272
AC011676.1	-1.88948	0.894802
KRT8P43	-1.88948	0.894802
PPM1L	-1.88135	2.60505
AL390066.1	-1.87946	3.31208
PRDX1P1	-1.87915	0.969729
RNU6ATAC24P	-1.87737	1.22949
AC020571.1	-1.87645	0.907097
KLHL32	-1.87573	1.13924
AC120024.1	-1.87497	0.872573
AC096537.1	-1.87361	2.10309
AC010319.1	-1.87308	1.46037
ABHD2	-1.87143	3.7631
LGR6	-1.86784	3.70159
PTGIS	-1.86781	2.70723
GOLGA8UP	-1.86773	0.879407
AL033397.1	-1.86329	2.61867
SOX7	-1.86171	2.86808
AC009318.3	-1.86137	2.04153
AC104964.4	-1.86011	1.64858
UMODL1	-1.85899	1.17209
SNORA59B	-1.85776	0.994375
AC048341.2	-1.85723	1.35481
AC004908.2	-1.85303	1.38332
TLE4	-1.85303	1.45932
AC010359.1	-1.85176	1.3216
AC007552.2	-1.85095	1.89171
TMC2	-1.85064	1.4345
TMEM51-AS1	-1.85049	2.48374
FSIP1	-1.84968	1.4461
AL021920.3	-1.84907	1.05965
PADI4	-1.84851	2.01552
ZNF611	-1.84819	3.86271
AC087294.1	-1.84717	0.833568
AC084782.2	-1.84646	0.870654
COL6A4P2	-1.84596	1.70475
B3GAT1	-1.84444	1.71423
AL049776.1	-1.84236	2.68828
TTLL10-AS1	-1.84217	0.662831
AL049869.3	-1.84063	1.5667
EYS	-1.84006	1.55916
MYO3B	-1.8387	1.28264
TGFB1I1	-1.83745	2.94378
STEAP1	-1.8371	1.47616
Z94721.2	-1.83664	1.05209
AL353763.1	-1.83337	1.00234
FAM214A	-1.8309	2.50338
AL079307.1	-1.82947	0.838509
RNF217-AS1	-1.82717	1.28676
AC093515.1	-1.82704	0.754522
AC026367.3	-1.82603	1.24569
FHOD3	-1.82564	2.09054
ENKD1	-1.82223	4.85204
OAS1	-1.82213	3.44903
ISM1	-1.82195	1.35867
SLC9C1	-1.82155	1.64981
MROH2A	-1.82146	1.88888
ZEB1	-1.8209	1.64039
RASL11A	-1.81965	1.69212
GNE	-1.81844	5.98314
ATF7IP2	-1.81744	1.35
TRIM29	-1.81733	2.38037
NOV	-1.81709	2.35151
RF02247	-1.81625	2.09256
CFL1P3	-1.81269	0.73312
RDH10	-1.81211	5.75749
TNFSF15	-1.81198	1.19039
AL031666.3	-1.81091	0.974347
EDN1	-1.80977	1.96409
AC104115.2	-1.809	1.72118
CHIC1	-1.80894	1.82166
CD160	-1.80887	1.7111
AC099677.4	-1.80874	0.973341
AC234781.1	-1.80874	1.49357
KRT18P59	-1.80834	0.973173
C7orf71	-1.80819	1.24839
AC087752.3	-1.80711	1.90585
MECOM	-1.80699	2.12883
SPAG6	-1.80695	1.01643
KHDRBS3	-1.80695	1.01643
AL662844.4	-1.80603	0.972375
DCAF13P1	-1.80603	0.972375
OTUD7A	-1.80595	1.24645
AC133473.1	-1.8058	0.972558
AL023284.4	-1.80577	1.98217
OR2A13P	-1.80572	0.72077
GCOM2	-1.80562	0.809473
RPL26P27	-1.80547	1.24494
AC117500.2	-1.80547	1.24494
TMEM14EP	-1.80547	1.24494
AC004884.2	-1.80531	0.809447
RF01241	-1.80439	1.25032
LINC00677	-1.80439	1.25032
TSPAN18	-1.80431	1.93902
ETDA	-1.80423	1.25062
LOXL1-AS1	-1.80398	2.51077
SLC25A39P1	-1.80315	1.24291
HSPE1P26	-1.80307	1.11919
FAM95C	-1.80307	1.11919
DIAPH2-AS1	-1.80237	1.33631
CD36	-1.80174	1.11658
LINC01715	-1.80158	1.02769
PSPC1P1	-1.80143	0.82729
RPL7P26	-1.80035	0.97998
AC090666.1	-1.80035	0.97998
SSTR1	-1.79769	0.723418
S100A4	-1.79761	2.70166
SERPINB8	-1.79697	3.28306
AP001596.1	-1.79555	1.30343
LIPG	-1.79551	2.84349
AP001284.1	-1.79489	2.8558
AC092535.2	-1.79455	0.979119
AC078778.1	-1.79353	1.65304
TP53AIP1	-1.79252	1.65678
CATSPERB	-1.79245	2.59271
EWSAT1	-1.79236	1.65505
AL606834.2	-1.79103	1.69836
AC109462.1	-1.78854	2.0643
AC105460.2	-1.78812	0.695605
AC016526.2	-1.78615	1.37514
LRRC69	-1.78595	3.81384
EGF	-1.78544	4.89771
DZANK1	-1.78335	3.06472
AL139300.2	-1.78076	0.728989
AC092127.1	-1.78068	0.822695
AC005336.1	-1.77935	2.19198
AC105020.6	-1.77887	0.767484
AC008481.1	-1.77781	1.01093
ST13P3	-1.77615	1.01057
KCNK2	-1.77614	1.59613
AC110048.2	-1.77533	0.726266
AL162385.2	-1.77509	1.87906
SPRR1A	-1.77505	2.35571
AL136116.3	-1.77417	1.97439
AL157791.2	-1.77294	2.02791
BACH1-IT2	-1.77286	1.21392
AC078883.3	-1.77245	1.24256
AL513329.1	-1.7723	1.24286
CCDC83	-1.77078	1.02172
ZNF671	-1.77003	1.97925
PTMAP1	-1.76972	0.82246
AC097716.1	-1.76957	1.02148
AC097639.1	-1.76931	1.68768
HHIPL2	-1.76928	2.56505
AC092681.2	-1.76914	1.89271
MAP3K5	-1.76909	3.38306
MTATP6P26	-1.76797	0.771149
MIR429	-1.76652	2.61255
LINC00939	-1.76485	1.56283
C1orf143	-1.76241	0.556791
GALNT10	-1.76213	2.44853
FOXQ1	-1.76036	3.64153
PLA2G12AP1	-1.7563	1.10823
CYP27A1	-1.75592	1.06278
C10orf111	-1.75565	1.33537
FRMPD3	-1.75168	2.81984
SLC1A2	-1.75063	2.11306
RS1	-1.75054	0.799093
RF00019	-1.75054	0.799093
CYP2AB1P	-1.75031	0.621433
ENPP7	-1.74783	0.95173
CDH5	-1.74723	3.15444
MSMO1	-1.74541	1.96573
AL356124.1	-1.74504	1.19385
AC244197.2	-1.74496	1.19377
AL390726.6	-1.7417	2.08104
AL139089.1	-1.74131	1.82224
GRIA2	-1.74121	1.97916
DEPDC1-AS1	-1.74084	0.672799
PROX2	-1.73991	1.39259
ARHGDIG	-1.7399	1.03713
RXFP1	-1.73955	1.10555
MSNP1	-1.73849	1.27887
AC134878.2	-1.73804	2.03093
NAALADL2	-1.73788	2.16985
RN7SL192P	-1.73628	1.47289
KBTBD8	-1.73555	1.03629
AL035661.1	-1.73432	2.83787
KAT6B	-1.73197	2.83266
CCDC102B	-1.73176	1.71436
FGF17	-1.72503	1.45226
ZNF365	-1.72387	1.68141
LINC02561	-1.72306	3.16749
AC027796.4	-1.72248	1.44069
AC104938.1	-1.72131	0.732054
ACOX2	-1.72076	2.63399
P2RY6	-1.72024	2.12288
IRF9	-1.72	2.09264
AL132656.4	-1.71939	2.79161
C17orf49	-1.71935	0.898668
IL10RB-AS1	-1.71729	1.21759
LANCL2	-1.71647	4.00583
AL009176.1	-1.71622	1.20632
AL356740.3	-1.71575	1.49865
TGFBR2	-1.71469	3.53339
AC087742.1	-1.71283	1.03357
CELF4	-1.71081	1.29911
CFAP44-AS1	-1.71081	1.29911
AC022509.3	-1.71024	4.06897
FOXN4	-1.70999	1.74123
AL390719.2	-1.70835	2.05474
MAGEA12	-1.70824	4.03635
MIR23B	-1.70532	1.36196
ZNF662	-1.70439	1.84943
IL20RA	-1.70431	2.62185
AC005225.4	-1.70426	1.36198
SPRR1B	-1.70416	1.14913
TNFSF13B	-1.70223	3.0935
CA12	-1.70166	3.03227
SRD5A2	-1.70142	1.14905
AP001207.3	-1.70119	3.09645
RINL	-1.70015	1.89415
MIR29B2CHG	-1.69843	2.01062
KMO	-1.69815	2.50852
RNA5SP311	-1.69812	0.946556
AC011912.1	-1.69765	1.3377
RBFADN	-1.69709	2.28982
AC012074.1	-1.69618	1.40898
TTLL9	-1.69564	1.30404
AL844908.1	-1.69517	1.25147
AC139887.4	-1.69486	1.73045
AC023908.3	-1.69175	3.18731
AL391427.1	-1.69132	3.09626
RF00096	-1.69038	3.61908
AC016773.1	-1.68626	1.0954
IFNWP2	-1.68605	1.20861
EPS8L3	-1.68595	1.48825
RN7SL3	-1.68476	1.42425
AC004160.1	-1.68418	1.49198
AL133406.3	-1.68365	2.78417
CLEC19A	-1.68365	2.78417
LRRC8C	-1.68224	2.61797
AC008741.2	-1.68204	2.69116
AGR2	-1.6816	2.14229
AC090695.1	-1.68138	0.975443
AC074032.1	-1.68036	1.20524
PAX6	-1.67748	3.13199
ME1	-1.67661	2.72543
FGF12	-1.67583	1.68289
AC138866.2	-1.67307	0.630084
AC078778.2	-1.67245	1.06205
DUX4L50	-1.67235	1.12142
IGLJCOR18	-1.67229	2.03285
PCDH9	-1.67219	1.14161
IGFL1	-1.6712	1.40396
ZNF713	-1.67075	1.89646
AC107027.3	-1.66809	1.72297
AC090192.2	-1.66341	0.945168
RN7SL834P	-1.6626	1.13345
LFNG	-1.66199	1.55727
BCL2L15	-1.66002	1.35416
AC055854.1	-1.65932	1.9296
TMEM132B	-1.65774	0.849121
PLCE1-AS1	-1.65705	0.764056
ZMAT4	-1.65682	4.88369
RF00569	-1.6538	1.23694
GLP2R	-1.65379	1.05049
LINC02541	-1.65301	1.13754
AC245452.2	-1.65159	0.827421
FAM151A	-1.6502	1.88981
DSEL	-1.64904	1.67226
AL049646.1	-1.64827	1.30094
DIO3OS	-1.64488	1.91969
AL121758.1	-1.64471	1.58377
AL160408.4	-1.64457	1.8301
RTKN2	-1.64222	2.42471
KRT13	-1.6419	1.37232
AC016394.2	-1.64089	3.16036
HOXB5	-1.64025	1.68216
AC093535.2	-1.64004	1.4585
RBM15-AS1	-1.63923	2.9552
IL7R	-1.6343	1.42036
SLC9A2	-1.6338	3.39027
AL353625.1	-1.6336	1.86932
TOGARAM1	-1.63227	1.80157
AL158847.1	-1.63147	1.15998
AC069528.2	-1.62537	1.7005
PLEKHD1	-1.62425	2.05603
HOXB-AS3	-1.62108	3.38557
SHC4	-1.62041	1.64698
PTPRK	-1.61936	4.0699
AP003068.4	-1.61793	1.95379
UNC79	-1.61781	1.34314
CA2	-1.61718	1.77876
AC060766.7	-1.61658	1.28713
TLR1	-1.6164	4.10191
UCP3	-1.61629	2.33797
HSPB11	-1.61617	3.12741
EIF3EP1	-1.61539	1.66231
RF02250	-1.61512	1.21814
RGS17	-1.61492	2.69237
AC090948.3	-1.61461	0.911882
AP000811.1	-1.61424	0.811659
AP006222.1	-1.61304	1.3207
ZNF503-AS1	-1.61193	2.01203
EFR3B	-1.60729	1.6013
NAV3	-1.60506	2.26573
SLC27A2	-1.60428	2.93502
FECH	-1.60423	3.03074
ATP1B1	-1.60351	2.82841
AKR1C4	-1.60306	3.21246
C16orf45	-1.60036	2.06598
AMIGO2	-1.59989	1.95437
FANCM	-1.59779	2.17999
LINC02331	-1.59706	1.18881
AL590282.1	-1.59546	0.899182
MUC1	-1.59422	3.046
IMPG1	-1.59379	2.6155
RF00096	-1.59332	3.37106
ASPRV1	-1.59259	1.6129
AC012676.2	-1.59161	0.537285
MIR1249	-1.59161	0.537285
FARSA-AS1	-1.59161	0.537285
AL160394.1	-1.59161	0.537285
BIRC6-AS1	-1.59161	0.537285
THSD4-AS1	-1.59161	0.537285
AP001318.3	-1.59161	0.537285
ATP5F1AP3	-1.59161	0.537285
AC073174.1	-1.59143	0.714865
RF00017	-1.59143	0.714865
P2RX1	-1.59143	0.714865
SVILP1	-1.59143	0.714865
CICP6	-1.59143	0.714865
AC073575.1	-1.59143	0.714865
AC067956.1	-1.59125	0.714926
LINC00327	-1.59125	0.714926
CENPS-CORT	-1.59125	0.714926
SLA2	-1.59125	0.714926
RF00019	-1.59125	0.714926
DNAH8	-1.59125	0.714926
SLC16A9	-1.59125	0.714926
RPSAP14	-1.59125	0.714926
RF00019	-1.59125	0.714926
AC147651.2	-1.59125	0.714926
SLC25A1P5	-1.59125	0.714926
FAM71D	-1.59107	0.537231
ZNF177	-1.59107	0.537231
RF01293	-1.59107	0.537231
	-1.59107	0.537231
OTOA	-1.59107	0.537231
GPR63	-1.59107	0.537231
AP000866.1	-1.5905	1.1431
AC096921.2	-1.58944	2.07628
UQCRBP3	-1.58929	0.537053
AF127936.2	-1.58929	0.537053
ZNF807	-1.58929	0.537053
PAWRP1	-1.58929	0.537053
AC005722.1	-1.58929	0.537053
EEF1A1P12	-1.58929	0.537053
AC012370.1	-1.58911	0.714372
CCDC13-AS1	-1.58911	0.714372
RPL7L1P3	-1.58911	0.714372
TCEA1P3	-1.58911	0.714372
ASB2	-1.58911	0.714372
MUSK	-1.58911	0.714372
AP002336.1	-1.58911	0.714372
AC002401.3	-1.58911	0.714372
AL008582.1	-1.58911	0.714372
A2MP1	-1.58911	0.714372
JAKMIP2	-1.58911	0.714372
NDUFAF4P2	-1.58893	0.714432
SPINT4	-1.58893	0.714432
AL133481.1	-1.58893	0.714432
LINC00397	-1.58893	0.714432
LRRC43	-1.58893	0.714432
RPS2P44	-1.58893	0.714432
POU5F1P5	-1.58893	0.714432
CCDC54	-1.58893	0.714432
CCNE2	-1.5889	3.00475
AP006287.2	-1.58876	0.536999
SERPINA3	-1.58876	0.536999
AC022898.2	-1.58876	0.536999
RPL17P25	-1.58876	0.536999
AC040904.1	-1.58876	0.536999
PTCHD3P3	-1.58791	0.612631
HNRNPKP2	-1.58772	0.95432
FP325335.1	-1.58724	1.33884
AL445685.1	-1.58695	0.881641
AP003733.4	-1.58666	1.8745
IDI1	-1.58665	1.70343
AF127577.6	-1.58614	0.791882
RF00019	-1.58595	0.770566
AL031281.2	-1.58586	0.98393
FOXF1	-1.58557	0.674695
ASF1A	-1.58531	2.89606
KNOP1P2	-1.5853	1.28967
AC018695.2	-1.5851	0.711773
AC138951.2	-1.5851	0.711773
AL022345.1	-1.5851	0.711773
RPL36AP45	-1.5851	0.711773
AL035634.1	-1.5851	0.711773
AL157756.1	-1.5851	0.711773
AC022509.1	-1.5851	0.711773
AC105137.2	-1.5851	0.711773
AL445623.2	-1.58492	1.03741
SFTPB	-1.58492	1.03741
AC036103.1	-1.58492	1.03741
AC009090.3	-1.58492	1.03741
KLRC2	-1.58492	1.03741
AP002852.1	-1.58492	1.03741
RPS3P2	-1.58492	1.03741
AC012213.3	-1.58492	1.03741
CCNA1	-1.58492	1.03741
RNU6-1316P	-1.58492	1.03741
AC090587.2	-1.58492	1.03741
AC091133.2	-1.58492	1.03741
AL136980.1	-1.58492	1.03741
AC091132.1	-1.58479	1.67737
AC020659.1	-1.58474	0.711746
TOX4P1	-1.58474	0.711746
FRY-AS1	-1.58474	0.711746
AC091544.3	-1.58474	0.711746
AL512380.1	-1.58474	0.711746
PCDHB6	-1.58474	0.711746
IDI2	-1.58474	0.711746
AC087241.3	-1.58474	0.711746
SETP5	-1.58474	0.711746
SLC35E1P1	-1.58474	0.711746
AC244090.2	-1.58474	0.711746
RN7SL812P	-1.58474	0.711746
AC005355.2	-1.58474	0.711746
RNU6-1098P	-1.58474	0.711746
NTS	-1.58416	1.25811
NFKBIZ	-1.58399	2.34029
RN7SKP239	-1.58394	0.732348
AC117383.1	-1.58385	1.17088
AL390728.2	-1.58385	1.17088
AC069200.1	-1.58376	1.54345
AP000240.1	-1.58342	1.02862
TLL1	-1.58286	0.938853
RPL35AP32	-1.58278	0.71128
ADAM20	-1.58278	0.71128
AC006387.1	-1.58278	0.71128
AC091133.5	-1.58278	0.71128
AC018714.1	-1.58278	0.71128
AC092375.3	-1.58278	0.71128
RNA5SP288	-1.58278	0.71128
RPL7AP65	-1.58278	0.71128
AL590006.1	-1.58278	0.71128
AL359397.1	-1.58278	0.71128
AC006480.1	-1.58278	0.71128
AC122718.2	-1.58278	0.71128
RAI1-AS1	-1.58278	0.71128
AC008427.1	-1.58278	0.71128
AC008781.1	-1.5826	1.03585
CD244	-1.5826	1.03585
AC010598.1	-1.5826	1.03585
AC006042.2	-1.5826	1.03585
PGK1P2	-1.5826	1.03585
RPL7AP60	-1.5826	1.03585
AL357153.1	-1.5826	1.03585
RF00072	-1.5826	1.03585
CMPK2	-1.5826	1.03585
AL352984.1	-1.58251	0.983355
LINC00639	-1.58251	0.983355
MUC2	-1.58242	0.711252
AC040975.1	-1.58242	0.711252
RAMP2	-1.58242	0.711252
AC108066.1	-1.58242	0.711252
ZFHX4	-1.58067	0.804257
TACR3	-1.58058	1.18484
AP001363.1	-1.58058	1.18484
AL391094.1	-1.58058	1.18484
LAMB4	-1.58015	0.835083
SLX1B	-1.57933	0.986478
AL138789.1	-1.57893	2.01343
TTC39A-AS1	-1.57855	0.713934
AC104046.1	-1.57855	0.713934
IMPDH1P6	-1.57855	0.713934
AC007365.1	-1.57843	1.15005
AL352979.3	-1.57837	0.713846
RP11-346C20.4	-1.57837	0.713846
AL627230.2	-1.57837	0.713846
AC011726.3	-1.57837	0.713846
RF02246	-1.57789	1.47967
AL160408.1	-1.57747	3.83463
AL021878.2	-1.57726	0.786928
RNU7-171P	-1.57701	0.733999
AL359715.1	-1.57635	3.0975
TYRO3P	-1.57624	0.713431
B4GALT4-AS1	-1.57624	0.713431
EIF4EBP1P1	-1.57624	0.713431
AC117386.1	-1.57624	0.713431
AL590369.1	-1.57614	0.773627
CASC15	-1.57605	0.713343
RN7SL181P	-1.57605	0.713343
AP000265.1	-1.57605	0.713343
PVALEF	-1.57605	0.713343
CD38	-1.57605	0.713343
DLG3-AS1	-1.57605	0.713343
TMOD1	-1.57601	2.0162
IQANK1	-1.57598	4.42315
AC104651.1	-1.57518	0.612823
RNU6-1016P	-1.5746	0.908575
AL049833.2	-1.57411	0.622466
PDE3A	-1.57359	0.923143
AC010273.1	-1.57295	0.612529
Z95624.1	-1.57198	0.535309
RNU6-304P	-1.57198	0.535309
AC009032.1	-1.57154	1.14802
AL122023.1	-1.57101	0.952809
PDXP	-1.57074	1.33616
MCIDAS	-1.57068	4.10526
ACAT2	-1.56981	1.57729
CLEC7A	-1.56978	2.2762
AC002545.1	-1.56966	0.535074
AL161452.1	-1.56966	0.535074
MIR3657	-1.56966	0.535074
SLC10A5	-1.5692	3.05458
AC069544.1	-1.5691	0.733298
NECTIN3	-1.56902	1.69977
SOX2-OT	-1.56898	0.87267
AC025176.1	-1.56863	1.43191
AC073052.1	-1.56814	0.877764
TMEM156	-1.56774	1.73889
ANTXR1	-1.56666	1.92548
HSPA1A	-1.56652	2.58056
AC022558.3	-1.56647	0.668534
NPM2	-1.56647	0.668534
ABHD12B	-1.56637	2.38694
UBE2V2P3	-1.56565	1.4366
CARD8-AS1	-1.56542	1.3618
AL008718.3	-1.565	1.02799
ARAP3	-1.56485	2.69209
AL136531.2	-1.56444	1.04488
AL024497.2	-1.56359	1.44119
MEGF9	-1.56126	4.94327
C1S	-1.56103	1.60976
AL589935.1	-1.56098	1.51375
LINC00284	-1.56094	1.27582
BGLAP	-1.56025	0.89717
NPPA	-1.55995	1.05049
WNT16	-1.55936	1.34108
UQCRBP1	-1.55929	0.730353
AL450468.1	-1.55853	0.948116
INTS6P1	-1.55847	1.04114
IL1F10	-1.55777	0.956148
AC010331.1	-1.5568	0.691602
AC096533.1	-1.55622	1.15792
SEC63P1	-1.55622	1.15792
AC123768.2	-1.55622	1.15792
AC073869.3	-1.55622	1.15792
GLI2	-1.55554	2.94453
AP003733.1	-1.55544	0.873264
AL121839.2	-1.55542	1.86005
AC010336.1	-1.55517	0.796978
ATP5MFP4	-1.55499	1.15789
LINC01494	-1.55499	1.15789
AC094019.1	-1.55416	0.777388
GYG1P3	-1.55305	1.16022
AL031280.1	-1.55296	1.51727
MIP	-1.55277	0.727199
UPF3AP2	-1.55191	1.15982
HLF	-1.55191	1.15982
AC005746.1	-1.55182	1.51636
AC007950.2	-1.55173	1.16026
LINC01290	-1.55164	0.727007
VSTM5	-1.55098	2.52544
BIK	-1.55095	2.96235
SESN1	-1.55029	3.53526
RPSAP20	-1.55019	1.67018
AC026801.1	-1.54987	0.798307
PRR25	-1.54982	0.959798
CFAP206	-1.5496	0.798256
AC005077.4	-1.54877	1.50466
SFR1P1	-1.54873	0.798085
RPS12P20	-1.54864	1.17343
SLC4A1APP1	-1.54864	1.17343
SLC34A2	-1.54855	1.17351
AC010280.2	-1.54846	0.798034
FAM69A	-1.54796	2.76906
IFFO2	-1.54712	4.25608
LINC00960	-1.5469	1.46287
AC091390.1	-1.54641	0.730098
AC137630.2	-1.54587	0.784462
CPNE4	-1.54485	1.34981
AP002364.1	-1.54388	1.40264
GTF2IRD2P1	-1.54252	1.40705
BRMS1L	-1.54211	3.46404
AC011472.2	-1.54184	0.94577
AL033397.2	-1.54177	1.40676
SNORA16B	-1.54034	1.41801
AP002840.2	-1.53971	1.42522
AC009948.5	-1.53947	1.0415
GABRR2	-1.53903	1.40546
AC105430.1	-1.53609	0.780324
FOXD4	-1.53504	1.36451
TPH1	-1.53422	1.48812
LINC00342	-1.53258	1.27848
HSPA1B	-1.53203	3.23037
LRP12	-1.53022	2.13321
AC245100.7	-1.52838	0.530823
RPL21P12	-1.52838	0.530823
RAB5CP2	-1.52838	0.530823
CLEC11A	-1.52838	0.530823
AC078883.4	-1.5282	0.701043
AC090971.2	-1.5282	0.701043
PRKCA-AS1	-1.5282	0.701043
PNPT1P1	-1.5282	0.701043
AC116049.2	-1.5282	0.701043
RF02271	-1.5282	0.701043
AC008592.5	-1.5282	0.701043
B3GALNT1P1	-1.5282	0.701043
RN7SL397P	-1.5282	0.701043
AC023906.4	-1.5282	0.701043
AC090058.1	-1.5282	0.701043
RAB1C	-1.5282	0.701043
TTC39C-AS1	-1.5282	0.701043
AL031668.1	-1.5282	0.701043
AL732292.2	-1.52802	0.701096
AC025268.1	-1.52802	0.701096
AC108860.1	-1.52802	0.701096
AC073569.3	-1.52802	0.701096
AC007298.2	-1.52802	0.701096
ECEL1P3	-1.52802	0.701096
AC092849.1	-1.52802	0.701096
MIR3125	-1.52802	0.701096
RNU6-998P	-1.52802	0.701096
UBE2CP2	-1.52784	0.530767
AC027514.1	-1.52784	0.530767
AC106786.1	-1.52784	0.530767
CCDC166	-1.52784	0.530767
AL731733.1	-1.52784	0.530767
RNU6-703P	-1.52784	0.530767
SNX20	-1.52784	0.530767
AC087749.1	-1.52784	0.530767
AL596218.1	-1.52784	0.530767
AC068228.1	-1.52784	0.530767
MYO1G	-1.52784	0.530767
MIR6740	-1.52784	0.530767
THNSL1	-1.52771	3.22902
KLHL31	-1.52712	2.39566
RN7SL4P	-1.52598	0.745917
AC009229.3	-1.52486	0.947702
EFCAB6	-1.52267	1.38684
SPATA13	-1.52193	3.18109
MRPS36P5	-1.52187	0.697971
AC092747.1	-1.52187	0.697971
AC016831.3	-1.52187	0.697971
LINC02482	-1.52187	0.697971
AC118553.2	-1.52187	0.697971
RNU6V	-1.52187	0.697971
AP000238.1	-1.52178	0.946811
AL022097.1	-1.52169	0.99527
TMED11P	-1.52169	0.99527
SLC15A5	-1.52169	0.99527
AL358852.1	-1.52169	0.99527
ADAM21	-1.52163	1.00724
AC011825.2	-1.5216	0.946861
AC116049.1	-1.52151	0.697937
AC084346.1	-1.52151	0.697937
IPO9-AS1	-1.52151	0.697937
ZNF675	-1.52151	0.697937
AP000925.1	-1.52151	0.697937
UBA52P5	-1.52151	0.697937
TVP23CP1	-1.52151	0.697937
MIR1301	-1.52151	0.697937
AC009269.5	-1.52151	0.697937
BX284668.1	-1.52151	0.697937
RNU6-80P	-1.52151	0.697937
FNTB	-1.5203	2.45285
RPL29P19	-1.51851	0.949347
LINC02306	-1.51842	0.949324
AC016526.3	-1.51739	0.909227
TIAF1	-1.51692	1.69268
ZNF655	-1.51682	2.23973
PRRT1B	-1.51532	0.699863
LINC01505	-1.51532	0.699863
FAM183BP	-1.51532	0.699863
AC233263.6	-1.51532	0.699863
AL355355.2	-1.51532	0.699863
AL589765.6	-1.51532	0.699863
MIR548AC	-1.51532	0.699863
MIR645	-1.51532	0.699863
RPL12P6	-1.51514	0.699776
TEX101	-1.51514	0.699776
AL391839.2	-1.51514	0.699776
AC108206.1	-1.51514	0.699776
TPRXL	-1.51514	0.699776
RNU6-176P	-1.51514	0.699776
AC005034.4	-1.51514	0.699776
ITGB7	-1.5143	2.01771
VEGFD	-1.51423	1.72922
KATNAL2	-1.51372	1.69624
ARHGEF38	-1.5131	1.43215
PPIF	-1.51299	3.19358
CSAG1	-1.51288	3.57656
RAB6D	-1.50875	0.528758
TSPOAP1-AS1	-1.50875	0.528758
AP001029.3	-1.50875	0.528758
AL353807.1	-1.50875	0.528758
LRP1-AS	-1.50875	0.528758
RF00019	-1.50875	0.528758
XCL1	-1.50875	0.528758
INSIG1	-1.50776	1.49892
AL121894.2	-1.50632	1.92697
KRT18P34	-1.50613	0.79646
AL121761.1	-1.5051	1.57775
ANXA4	-1.50494	5.89916
CD226	-1.50343	0.88707
VNN1	-1.503	2.1074
ZNF488	-1.50294	1.55438
C1R	-1.50142	4.34218
SLC7A7	-1.50044	2.40527
GCLM	-1.49989	2.8335
TP53INP1	-1.49986	3.09368
MIRLET7BHG	-1.49965	3.0696
PRC1-AS1	-1.49835	1.65335
ADAM32	-1.49687	1.68854
KIAA0319	-1.49677	4.8322
INPP4B	-1.49651	2.03865
FAM46C	-1.49588	2.33261
TMEM64	-1.49511	1.92908
MIR200B	-1.49398	1.63241
MPZ	-1.49355	1.84667
AC011442.1	-1.49256	1.43356
PCED1B	-1.4919	1.80498
SLC2A12	-1.49148	3.32791
COX7A1	-1.49069	0.980386
RIBC2	-1.49054	2.46186
AC107375.1	-1.48981	2.02245
NCBP2-AS1	-1.48921	1.50825
AGXT	-1.48814	2.71799
AC114810.1	-1.48799	0.945329
LMO3	-1.48733	1.55638
AP000941.1	-1.48676	2.23559
SLC52A3	-1.48599	3.89835
AP000866.4	-1.48554	0.827673
AP001056.1	-1.4855	2.01407
NMRAL2P	-1.48501	4.23225
INA	-1.4841	2.01292
AC091132.4	-1.48399	0.757794
F2RL2	-1.48385	0.916133
AC005674.1	-1.483	1.06963
FAM238C	-1.48272	3.26595
LINC01523	-1.48253	1.14276
LIPE	-1.48223	4.12649
TOB1-AS1	-1.48221	0.673726
AC019097.1	-1.48133	1.62509
CISD1	-1.48063	3.05242
TIMP3	-1.47768	3.43845
PBLD	-1.4774	1.55794
CYP27C1	-1.47387	2.07185
AL161733.1	-1.47289	1.23517
AC116667.1	-1.47072	1.40246
B3GAT2	-1.47072	2.10561
FGFBP1	-1.47062	1.22184
CPED1	-1.47017	1.55224
GPR158	-1.46995	1.65438
EPM2A	-1.46948	3.23645
ZNF407	-1.46947	3.62359
SLC51A	-1.46764	2.0586
CLCA2	-1.4672	2.47638
DOCK8	-1.46716	1.53485
SYNE2	-1.46606	2.87925
RN7SL2	-1.46586	0.981745
PLLP	-1.46464	3.08888
FAM215B	-1.46395	0.854516
PCNPP1	-1.46352	0.794478
LINC01134	-1.46279	1.33726
HOXB4	-1.46131	0.995534
BACH2	-1.45935	1.51758
C11orf45	-1.45891	3.46482
ARL4AP3	-1.4581	1.54126
AL391994.1	-1.45799	1.13322
Z95331.1	-1.45712	1.65868
AP000437.1	-1.45564	1.2265
AL353593.3	-1.45505	2.83741
TAS2R10	-1.45481	1.52102
SERINC2	-1.45477	1.92597
ID3	-1.45445	1.8865
AC126118.1	-1.45405	0.912403
AC022893.1	-1.45386	0.882805
C9orf163	-1.45079	1.04064
ADAT3	-1.45018	1.83022
AP002907.1	-1.44976	2.14116
COQ6	-1.4496	3.01452
SLC39A11	-1.44947	5.70511
DLL4	-1.44919	1.25616
PALM2	-1.44841	1.70856
AC007529.2	-1.44814	0.691561
AC016831.5	-1.44811	1.19119
AL118516.1	-1.44795	2.23137
SLC2A6	-1.44621	2.8427
AL596202.1	-1.44581	1.97337
ACOT1	-1.44574	3.15756
MIPOL1	-1.44506	2.18448
LINC02280	-1.44486	1.15811
DIO2	-1.44351	1.41827
AC024884.2	-1.4428	1.16593
LINC00930	-1.44159	1.83605
MFAP4	-1.44043	1.4527
AL353768.1	-1.4404	1.59497
CDKN2B-AS1	-1.44031	2.58319
AC009506.1	-1.43835	1.04693
B3GALNT1	-1.43756	3.99803
AC079610.1	-1.43742	0.891483
COLQ	-1.43658	1.39198
HOXB6	-1.43467	2.62562
WNT3A	-1.43093	1.937
IFNGR1	-1.43038	3.69896
ERG28	-1.42978	2.34179
SNX18P12	-1.42914	1.01943
AC046130.2	-1.42859	1.53964
SLC1A7	-1.42803	2.29285
ATF5	-1.42778	2.3441
SUMO1P3	-1.42625	2.32575
SQLE	-1.42592	1.43089
EPSTI1	-1.42448	1.4003
C1orf100	-1.42377	0.825288
C10orf67	-1.42284	1.94063
CXCL8	-1.42275	2.59312
AC234778.2	-1.42128	0.631659
LINC01132	-1.421	2.88812
KITLG	-1.42073	4.0237
STRA6	-1.42054	2.02952
AP000808.1	-1.42048	1.47727
LINC01554	-1.42046	1.61893
DHCR24	-1.42032	2.11067
AC099329.2	-1.41899	2.43419
CYP3A7	-1.41763	0.669242
AC092119.2	-1.41758	3.16282
TPTE2	-1.41743	0.996559
MKRN5P	-1.41743	0.996559
MMP28	-1.4171	1.46674
C4orf19	-1.41651	3.57106
DNAL1	-1.41629	2.25462
AP001189.5	-1.41596	0.81643
ENTPD5	-1.41583	1.69542
AC007610.2	-1.41576	1.17123
MASP1	-1.41569	0.816561
FAM46A	-1.41534	3.99015
GLUL	-1.41524	3.53349
SAMD4A	-1.41507	3.65147
SPIN2A	-1.41506	1.3841
NHP2P1	-1.41415	0.934543
AC015813.7	-1.41352	0.997519
KIAA0825	-1.41327	1.81323
AL513548.1	-1.41306	1.53183
FAM155A	-1.4114	1.62702
AC211476.1	-1.41106	1.00345
AP000695.1	-1.41015	1.00301
SPIN3	-1.41	2.50478
BCL2L14	-1.40956	1.89168
DGCR12	-1.40945	0.926982
AC022150.2	-1.40909	2.30798
ABHD12	-1.40874	5.13199
HMGB3	-1.40785	2.07321
AL133338.1	-1.40745	1.88109
LCK	-1.40729	1.48486
CACNA1I	-1.40623	2.52488
AC016745.1	-1.40391	2.22383
CLDND2	-1.40294	1.00245
AC024257.3	-1.40075	2.71462
ZMIZ1	-1.39965	3.92312
FMR1NB	-1.39927	0.769305
ZNF648	-1.39901	0.845141
NMB	-1.39898	2.14452
AC004948.1	-1.39851	0.76351
SLC10A4	-1.39776	1.53422
MAPK1IP1L	-1.39756	2.96738
AC023590.1	-1.39746	0.66594
FOXE3	-1.39733	0.9207
MIR339	-1.39676	0.818098
CLDN1	-1.39662	2.82764
AL445645.1	-1.39593	0.665655
SHROOM1	-1.39529	3.66668
AC020765.3	-1.39523	1.15318
LUZP2	-1.39515	1.16307
SNRK-AS1	-1.39452	1.17515
PDCL3P5	-1.39439	1.17569
FRMPD2	-1.39432	0.816953
AC020978.4	-1.39377	0.691019
HCRTR1	-1.39362	1.16195
FFAR4	-1.39346	3.56262
AC092535.1	-1.3927	0.99112
RNU6-925P	-1.39207	1.7303
AL122035.2	-1.39204	1.0067
PFN1P8	-1.39194	0.994104
RPEL1	-1.39131	1.37243
RNU6-652P	-1.39111	0.720755
LCP1	-1.3906	3.3427
GMFB	-1.3906	2.51873
SLC47A1	-1.38949	2.80574
ERVMER34-1	-1.38899	0.761231
AL033384.2	-1.38877	0.985251
AC022182.1	-1.38786	0.723513
FAIM2	-1.3871	0.729244
SPCS3	-1.38693	3.80937
AC091132.5	-1.38633	0.723172
SLC26A8	-1.38622	1.08306
SLC45A4	-1.38337	2.54438
AC011416.3	-1.38297	0.979204
AC068790.9	-1.38232	0.645694
AC022596.2	-1.38029	1.04093
POLR3F	-1.37823	2.91957
AC244197.3	-1.37725	1.40335
SLCO1C1	-1.37718	0.714092
DLGAP5	-1.3766	2.0325
SULF2	-1.37638	3.29095
ATP6V1D	-1.37545	4.73352
AL136084.2	-1.37535	0.880205
LINC00624	-1.37482	1.38842
RNU6-516P	-1.37414	1.32552
ABCC2	-1.37344	2.84326
EPS8	-1.37302	3.88503
DSTN	-1.37299	4.22313
AC005062.1	-1.37264	0.977915
MTND5P42	-1.3719	0.715848
AL590399.4	-1.3719	0.715848
NAMPT	-1.37181	2.30917
AL355472.3	-1.37144	0.829489
RN7SKP80	-1.37028	0.759932
AC016586.1	-1.37002	0.862867
GLS	-1.36933	2.59751
[truncated: 22,984 more rows]

## Sheet: E_VD-Input_DownPC9UpMLN
gene_name	reg_type
PXYLP1	down_pc9gr
RTN1	down_pc9gr
SALRNA1	down_pc9gr
AC005674.2	down_pc9gr
AC126118.1	down_pc9gr
AC126755.2	down_pc9gr
AL691482.3	down_pc9gr
AL596218.1	down_pc9gr
AP000867.2	down_pc9gr
GTPBP1	down_pc9gr
ZNF83	down_pc9gr
CST7	down_pc9gr
DCAF4L1	down_pc9gr
CFAP157	down_pc9gr
CHST15	down_pc9gr
TRAPPC9	down_pc9gr
PLXNA1	down_pc9gr
LINC02334	down_pc9gr
AC005786.2	down_pc9gr
AC112487.1	down_pc9gr
SNAPC1	down_pc9gr
TTLL4	down_pc9gr
SLC9A3R1	down_pc9gr
UBE2W	down_pc9gr
NOP53-AS1	down_pc9gr
LPIN3	down_pc9gr
AL008582.1	down_pc9gr
AL023284.4	down_pc9gr
LDLR	down_pc9gr
GPATCH8	down_pc9gr
HSPA2	down_pc9gr
TACR2	down_pc9gr
LINC01619	down_pc9gr
AC027313.1	down_pc9gr
AC103591.3	down_pc9gr
PLAC8L1	down_pc9gr
SDR39U1	down_pc9gr
PIGT	down_pc9gr
ALAS1	down_pc9gr
FOXO1	down_pc9gr
CFAP20	down_pc9gr
MAGI2-AS3	down_pc9gr
CBX2	down_pc9gr
AL512506.1	down_pc9gr
AC092828.1	down_pc9gr
GBA2	down_pc9gr
C4B	down_pc9gr
DNAJB13	down_pc9gr
AL365295.1	down_pc9gr
ALDH1L1	down_pc9gr
MAN1A1	down_pc9gr
PRKN	down_pc9gr
SIGLEC15	down_pc9gr
CKMT1B	down_pc9gr
LINC01393	down_pc9gr
Z83851.1	down_pc9gr
DCAF4	down_pc9gr
TACC1	down_pc9gr
ZDHHC3	down_pc9gr
PRKD2	down_pc9gr
AC019205.1	down_pc9gr
KCNG3	down_pc9gr
SKI	down_pc9gr
FAM156A	down_pc9gr
CALCR	down_pc9gr
FP565260.6	down_pc9gr
NUDT16L1	down_pc9gr
KLHL31	down_pc9gr
MIR5581	down_pc9gr
BACH1-IT2	down_pc9gr
FRG1KP	down_pc9gr
TSPAN18	down_pc9gr
LRRN4CL	down_pc9gr
DAGLA	down_pc9gr
KIZ	down_pc9gr
TBC1D15	down_pc9gr
DMD	down_pc9gr
SRM	down_pc9gr
AC063944.2	down_pc9gr
KDM2B	down_pc9gr
PDCL3P5	down_pc9gr
MBOAT7	down_pc9gr
ERICH1	down_pc9gr
GSE1	down_pc9gr
UCP3	down_pc9gr
VAMP7	down_pc9gr
BBIP1	down_pc9gr
DENND6B	down_pc9gr
GALNS	down_pc9gr
AC134878.2	down_pc9gr
AL645608.8	down_pc9gr
AL132765.2	down_pc9gr
RNASEH2B-AS1	down_pc9gr
AP001284.1	down_pc9gr
GPR75	down_pc9gr
NCLN	down_pc9gr
AC003991.1	down_pc9gr
COLQ	down_pc9gr
IGFL1	down_pc9gr
FZR1	down_pc9gr
AC048341.1	down_pc9gr
ERBB4	down_pc9gr
CCDC12	down_pc9gr
MUSK	down_pc9gr
AC006059.1	down_pc9gr
AL513329.1	down_pc9gr
AL132656.3	down_pc9gr
SMAD3	down_pc9gr
NEDD4	down_pc9gr
ATP6V0B	down_pc9gr
CMTM1	down_pc9gr
ZC3H3	down_pc9gr
TMC2	down_pc9gr
AC068768.2	down_pc9gr
NKRF	down_pc9gr
DUSP2	down_pc9gr
LINC01474	down_pc9gr
SLC9C1	down_pc9gr
AC027514.1	down_pc9gr
HACE1	down_pc9gr
SCD5	down_pc9gr
AC020612.3	down_pc9gr
DMPK	down_pc9gr
AGAP1-IT1	down_pc9gr
AC087289.5	down_pc9gr
PRH1	down_pc9gr
LTBP2	down_pc9gr
MANSC4	down_pc9gr
TLNRD1	down_pc9gr
KCNJ9	down_pc9gr
AC122688.3	down_pc9gr
AC136475.3	down_pc9gr
SULT1A1	down_pc9gr
AC234781.5	down_pc9gr
AC027228.2	down_pc9gr
TTC5	down_pc9gr
TDH	down_pc9gr
PRR5-ARHGAP8	down_pc9gr
AC068594.1	down_pc9gr
AC087620.1	down_pc9gr
NFKBID	down_pc9gr
AP002884.1	down_pc9gr
MRPL35	down_pc9gr
RPSAP14	down_pc9gr
AC084782.2	down_pc9gr
MCAM	down_pc9gr
AC008883.1	down_pc9gr
RDH16	down_pc9gr
ZBTB11-AS1	down_pc9gr
ECEL1P3	down_pc9gr
GRAMD4	down_pc9gr
KAT2A	down_pc9gr
SLITRK6	down_pc9gr
MIEF1	down_pc9gr
FBXL19	down_pc9gr
CAMK2G	down_pc9gr
MVB12B	down_pc9gr
DNAH2	down_pc9gr
FAAP20	down_pc9gr
KCTD20	down_pc9gr
AC010422.6	down_pc9gr
MST1R	down_pc9gr
GLIS1	down_pc9gr
AC067930.6	down_pc9gr
EPPK1	down_pc9gr
RHPN1	down_pc9gr
TMEM150C	down_pc9gr
AL355802.1	down_pc9gr
LINC00624	down_pc9gr
SAP130	down_pc9gr
RN7SKP23	down_pc9gr
CAPZA1	down_pc9gr
CDYL2	down_pc9gr
AC021106.2	down_pc9gr
B3GALNT1	down_pc9gr
FAM136A	down_pc9gr
AL157791.1	down_pc9gr
LY75	down_pc9gr
ZBTB1	down_pc9gr
ZNF876P	down_pc9gr
AC004477.3	down_pc9gr
CYCSP10	down_pc9gr
PUS7	down_pc9gr
AL133406.2	down_pc9gr
LINC01137	down_pc9gr
PCDHB10	down_pc9gr
DIAPH1	down_pc9gr
IQSEC1	down_pc9gr
COQ8A	down_pc9gr
AC083964.1	down_pc9gr
MRPL49	down_pc9gr
CASZ1	down_pc9gr
LGALS9C	down_pc9gr
MIR600HG	down_pc9gr
NPIPB13	down_pc9gr
TMEM201	down_pc9gr
C7orf43	down_pc9gr
DISP2	down_pc9gr
C1orf226	down_pc9gr
MIR5008	down_pc9gr
CBLN3	down_pc9gr
MPP3	down_pc9gr
ARHGEF6	down_pc9gr
ACMSD	down_pc9gr
ZNF607	down_pc9gr
ZNF575	down_pc9gr
AC145423.3	down_pc9gr
RNU6-850P	down_pc9gr
AL121906.1	down_pc9gr
AC010680.5	down_pc9gr
RPL23AP67	down_pc9gr
AC013268.3	down_pc9gr
AC007552.2	down_pc9gr
PPP1R14C	down_pc9gr
KCTD12	down_pc9gr
AL353763.1	down_pc9gr
TNFSF9	down_pc9gr
ALS2CR12	down_pc9gr
C8orf37-AS1	down_pc9gr
PAM16	down_pc9gr
SDCBP2	down_pc9gr
AC008079.2	down_pc9gr
AC023043.2	down_pc9gr
RND1	down_pc9gr
PHTF2	down_pc9gr
CELF4	down_pc9gr
PRKCQ-AS1	down_pc9gr
MIR4458HG	down_pc9gr
AC135178.5	down_pc9gr
ARHGAP22	down_pc9gr
AL158163.1	down_pc9gr
AL133373.2	down_pc9gr
SLC25A43	down_pc9gr
AC032044.2	down_pc9gr
UBE2J2	down_pc9gr
AC090589.2	down_pc9gr
AP000808.1	down_pc9gr
ITGB5-AS1	down_pc9gr
CUBN	down_pc9gr
TMEM139	down_pc9gr
PPP1R13B	down_pc9gr
RNU6-10P	down_pc9gr
AC115618.1	down_pc9gr
AC104758.2	down_pc9gr
RNU6-516P	down_pc9gr
BACH1-IT1	down_pc9gr
ASPRV1	down_pc9gr
PALLD	down_pc9gr
AL162311.3	down_pc9gr
AC008494.1	down_pc9gr
BCLAF1	down_pc9gr
AC245041.1	down_pc9gr
MIR3176	down_pc9gr
AC067817.2	down_pc9gr
BRWD1-AS1	down_pc9gr
AC091057.3	down_pc9gr
ZNF331	down_pc9gr
AC087294.1	down_pc9gr
GMFG	down_pc9gr
SUV39H2	down_pc9gr
AL031985.3	down_pc9gr
UQCRBP3	down_pc9gr
CST3	down_pc9gr
SLC35A5	down_pc9gr
GLA	down_pc9gr
SMG1P2	down_pc9gr
SRD5A2	down_pc9gr
SMPD2	down_pc9gr
CSRP3	down_pc9gr
ALPP	down_pc9gr
RALGPS1	down_pc9gr
MFSD4A	down_pc9gr
ZNF107	down_pc9gr
CMYA5	down_pc9gr
C1orf198	down_pc9gr
EDAR	down_pc9gr
CREBBP	down_pc9gr
AC109454.2	down_pc9gr
SH3BGRL2	down_pc9gr
MCM8-AS1	down_pc9gr
TRABD2B	down_pc9gr
LINC02331	down_pc9gr
REXO1	down_pc9gr
SYT7	down_pc9gr
ZNF790	down_pc9gr
THEM4	down_pc9gr
SLC19A1	down_pc9gr
LIMS1	down_pc9gr
DCUN1D2	down_pc9gr
FOXE3	down_pc9gr
AL358115.1	down_pc9gr
NF1P12	down_pc9gr
HS6ST1P1	down_pc9gr
AC027237.3	down_pc9gr
TEPSIN	down_pc9gr
AC074050.4	down_pc9gr
BNC1	down_pc9gr
PCDHB6	down_pc9gr
AC097634.1	down_pc9gr
SLA2	down_pc9gr
SLC25A40	down_pc9gr
FOXD2	down_pc9gr
AC008736.2	down_pc9gr
MDGA1	down_pc9gr
DUTP2	down_pc9gr
AC245100.7	down_pc9gr
AL136531.2	down_pc9gr
UBASH3B	down_pc9gr
SEC16A	down_pc9gr
ANGPTL4	down_pc9gr
AC021242.3	down_pc9gr
SBF1	down_pc9gr
AC114341.1	down_pc9gr
HOXB4	down_pc9gr
CASC15	down_pc9gr
KDF1	down_pc9gr
IKBKB	down_pc9gr
MYEOV	down_pc9gr
AL022328.2	down_pc9gr
ZNF142	down_pc9gr
PEG13	down_pc9gr
RNU6-80P	down_pc9gr
MARK2	down_pc9gr
AC092368.3	down_pc9gr
HRASLS2	down_pc9gr
LIPG	down_pc9gr
AL021407.1	down_pc9gr
MAPK8	down_pc9gr
KCNJ12	down_pc9gr
ZFYVE28	down_pc9gr
NID2	down_pc9gr
AL591866.1	down_pc9gr
MRPS16	down_pc9gr
KBTBD4	down_pc9gr
RNU6-1016P	down_pc9gr
AC107959.2	down_pc9gr
MIR25	down_pc9gr
AC073127.1	down_pc9gr
PLIN5	down_pc9gr
HKR1	down_pc9gr
GJC2	down_pc9gr
RPL23AP17	down_pc9gr
TAS2R8	down_pc9gr
TM4SF1	down_pc9gr
SMG7	down_pc9gr
AC010531.3	down_pc9gr
NPIPA2	down_pc9gr
CTNND1	down_pc9gr
AC114495.2	down_pc9gr
AC132192.2	down_pc9gr
KNOP1P2	down_pc9gr
IMPDH1	down_pc9gr
ZNF620	down_pc9gr
POM121B	down_pc9gr
GABBR2	down_pc9gr
AC008760.2	down_pc9gr
KCNIP2	down_pc9gr
CFAP44-AS1	down_pc9gr
AC133550.2	down_pc9gr
PAGR1	down_pc9gr
POLD3	down_pc9gr
BEND3	down_pc9gr
AL034417.1	down_pc9gr
POU2F1	down_pc9gr
CNNM2	down_pc9gr
PSCA	down_pc9gr
TTLL5	down_pc9gr
SPINK8	down_pc9gr
FAM71D	down_pc9gr
SPTSSB	down_pc9gr
KDSR	down_pc9gr
FAM222A	down_pc9gr
HNRNPA1	down_pc9gr
ZC3H12B	down_pc9gr
LINC00526	down_pc9gr
AMER1	down_pc9gr
SPHK2	down_pc9gr
CYYR1-AS1	down_pc9gr
BICDL2	down_pc9gr
RBP5	down_pc9gr
E2F8	down_pc9gr
OTUD1	down_pc9gr
AC106037.2	down_pc9gr
JPT1	down_pc9gr
TC2N	down_pc9gr
MATR3	down_pc9gr
RBFOX3	down_pc9gr
PROZ	down_pc9gr
HNRNPA1P16	down_pc9gr
AP000238.1	down_pc9gr
DANT2	down_pc9gr
SAMD12	down_pc9gr
AP002761.4	down_pc9gr
CALML4	down_pc9gr
AC007382.1	down_pc9gr
ST3GAL1	down_pc9gr
TEKT4P2	down_pc9gr
CNN2P9	down_pc9gr
AC012074.1	down_pc9gr
SRPRA	down_pc9gr
UBQLN4	down_pc9gr
PAK6	down_pc9gr
TAS1R3	down_pc9gr
AC022306.3	down_pc9gr
CLPTM1	down_pc9gr
SVILP1	down_pc9gr
ALG1L	down_pc9gr
AGPAT3	down_pc9gr
AC016526.2	down_pc9gr
AC017067.1	down_pc9gr
E2F1	down_pc9gr
AL031710.2	down_pc9gr
RRP9	down_pc9gr
LINC00857	down_pc9gr
TMEM171	down_pc9gr
AASDHPPT	down_pc9gr
FAM110A	down_pc9gr
THTPA	down_pc9gr
CSK	down_pc9gr
FURIN	down_pc9gr
RHBDD2	down_pc9gr
RAB33A	down_pc9gr
ALDH1B1	down_pc9gr
LRRN4	down_pc9gr
AP5M1	down_pc9gr
C1orf159	down_pc9gr
CSNK1D	down_pc9gr
FAM118A	down_pc9gr
AL133215.2	down_pc9gr
JCAD	down_pc9gr
TWNK	down_pc9gr
KCNK12	down_pc9gr
FOXD2-AS1	down_pc9gr
CCNC	down_pc9gr
CHKA	down_pc9gr
ANKRD9	down_pc9gr
AC114489.1	down_pc9gr
SPATS2	down_pc9gr
ZNF813	down_pc9gr
NOS2P3	down_pc9gr
TAF6L	down_pc9gr
AC018638.2	down_pc9gr
WARS2-IT1	down_pc9gr
SAP30L-AS1	down_pc9gr
AC022400.2	down_pc9gr
JAG2	down_pc9gr
SLCO4A1	down_pc9gr
TBC1D4	down_pc9gr
CCDC84	down_pc9gr
AC008243.1	down_pc9gr
AC005546.1	down_pc9gr
AC027279.1	down_pc9gr
AC104129.1	down_pc9gr
GPR37	down_pc9gr
RN7SL81P	down_pc9gr
AC116407.4	down_pc9gr
P2RY6	down_pc9gr
NLRC5	down_pc9gr
AL596223.1	down_pc9gr
FGF7	down_pc9gr
RNU6ATAC24P	down_pc9gr
SLC47A1P1	down_pc9gr
RAB3B	down_pc9gr
AC002075.1	down_pc9gr
TNFSF13B	down_pc9gr
AL096865.1	down_pc9gr
SLC16A3	down_pc9gr
RANBP17	down_pc9gr
AL359715.3	down_pc9gr
SNX3	down_pc9gr
ASB18	down_pc9gr
NECAB3	down_pc9gr
MGAT4A	down_pc9gr
TSC22D4	down_pc9gr
AL031708.1	down_pc9gr
VN1R1	down_pc9gr
SRSF2	down_pc9gr
CCDC88C	down_pc9gr
AC092683.1	down_pc9gr
AC025154.2	down_pc9gr
SRGAP3	down_pc9gr
C8orf76	down_pc9gr
RN7SL397P	down_pc9gr
AC064801.2	down_pc9gr
TYRO3P	down_pc9gr
AC005722.1	down_pc9gr
RPL7AP2	down_pc9gr
GMNN	down_pc9gr
TIMM21	down_pc9gr
CEP152	down_pc9gr
AL031775.2	down_pc9gr
PRDM15	down_pc9gr
GSK3A	down_pc9gr
ADAM20	down_pc9gr
AC132008.2	down_pc9gr
KCNK5	down_pc9gr
DNER	down_pc9gr
TTC9	down_pc9gr
AC025627.1	down_pc9gr
ZBTB49	down_pc9gr
AL445685.1	down_pc9gr
AC079336.5	down_pc9gr
FAM160A1	down_pc9gr
CCDC115	down_pc9gr
AC104446.1	down_pc9gr
TUBB1	down_pc9gr
AC011465.1	down_pc9gr
AC011933.3	down_pc9gr
TOP1	down_pc9gr
AL157937.1	down_pc9gr
Z94721.1	down_pc9gr
RNU6-322P	down_pc9gr
CHORDC1	down_pc9gr
NUTM2B	down_pc9gr
MMS22L	down_pc9gr
AC040975.1	down_pc9gr
LY6K	down_pc9gr
UFSP1	down_pc9gr
CYP2D6	down_pc9gr
GRPEL1	down_pc9gr
CAPN10-AS1	down_pc9gr
C1orf61	down_pc9gr
C16orf45	down_pc9gr
DNAH17	down_pc9gr
NCOR2	down_pc9gr
TONSL	down_pc9gr
TNXB	down_pc9gr
TACR1	down_pc9gr
SNX25	down_pc9gr
MTND5P26	down_pc9gr
AC120057.4	down_pc9gr
HEPHL1	down_pc9gr
PCSK6	down_pc9gr
LINC01494	down_pc9gr
TUBA3E	down_pc9gr
MYO16-AS1	down_pc9gr
AC024267.3	down_pc9gr
PTPRH	down_pc9gr
AL049870.3	down_pc9gr
AC015961.2	down_pc9gr
MILR1	down_pc9gr
CYCSP34	down_pc9gr
SCAMP3	down_pc9gr
AC009090.4	down_pc9gr
LINC00313	down_pc9gr
AP003392.1	down_pc9gr
AL390067.1	down_pc9gr
FBXO46	down_pc9gr
ATP2B2	down_pc9gr
HPS1	down_pc9gr
LYPD8	down_pc9gr
SH2B1	down_pc9gr
AADACP1	down_pc9gr
AC055876.2	down_pc9gr
AL050343.1	down_pc9gr
KCNV2	down_pc9gr
AC100803.2	down_pc9gr
GCH1	down_pc9gr
PODXL	down_pc9gr
AC005162.3	down_pc9gr
LIPT1	down_pc9gr
SLC37A1	down_pc9gr
LIN7B	down_pc9gr
E2F7	down_pc9gr
VPS37B	down_pc9gr
ADAMTS17	down_pc9gr
WNT16	down_pc9gr
TRPV1	down_pc9gr
MAGEA10	down_pc9gr
SLCO1C1	down_pc9gr
QSOX2	down_pc9gr
SLC39A4	down_pc9gr
SMIM15-AS1	down_pc9gr
KMT2D	down_pc9gr
OGN	down_pc9gr
PPP5C	down_pc9gr
SCAMP4	down_pc9gr
RN7SL192P	down_pc9gr
HIC1	down_pc9gr
DCAF13P3	down_pc9gr
EEF1D	down_pc9gr
AC027288.3	down_pc9gr
AC023906.5	down_pc9gr
MELTF	down_pc9gr
LRRTM2	down_pc9gr
ATP6V0C	down_pc9gr
RPRD1A	down_pc9gr
EIF4ENIF1	down_pc9gr
AC004980.2	down_pc9gr
HPDL	down_pc9gr
AC016027.3	down_pc9gr
AP000941.1	down_pc9gr
RNU6-481P	down_pc9gr
DOCK9-AS2	down_pc9gr
CD247	down_pc9gr
AP002364.1	down_pc9gr
RSL24D1P6	down_pc9gr
AC022596.2	down_pc9gr
OR7E157P	down_pc9gr
SLC35C1	down_pc9gr
SHPK	down_pc9gr
BEND3P3	down_pc9gr
NBL1	down_pc9gr
LINC00184	down_pc9gr
ZNF252P-AS1	down_pc9gr
PTOV1-AS2	down_pc9gr
AC024940.1	down_pc9gr
FAXDC2	down_pc9gr
PRRT3-AS1	down_pc9gr
PGM5	down_pc9gr
HDAC10	down_pc9gr
RNMT	down_pc9gr
ZDHHC20-IT1	down_pc9gr
PIGU	down_pc9gr
CNNM3	down_pc9gr
GRAMD2B	down_pc9gr
ALMS1	down_pc9gr
AMPD2	down_pc9gr
GATA2-AS1	down_pc9gr
AL022323.4	down_pc9gr
AC004466.3	down_pc9gr
AC091132.4	down_pc9gr
AL590627.1	down_pc9gr
MYBBP1A	down_pc9gr
PASK	down_pc9gr
AC121761.1	down_pc9gr
COL12A1	down_pc9gr
AC073611.1	down_pc9gr
ISCA2	down_pc9gr
HMGB1	down_pc9gr
AL161431.1	down_pc9gr
RPL7P28	down_pc9gr
SOX7	down_pc9gr
IQCK	down_pc9gr
SLC25A39P1	down_pc9gr
PTPRE	down_pc9gr
ALKBH3-AS1	down_pc9gr
JAM3	down_pc9gr
PSG8	down_pc9gr
AC090922.1	down_pc9gr
FAM13A-AS1	down_pc9gr
SP6	down_pc9gr
ATP11A	down_pc9gr
MIR5194	down_pc9gr
LINC02019	down_pc9gr
ZNF692	down_pc9gr
AP000648.3	down_pc9gr
Z83851.2	down_pc9gr
TRAF3	down_pc9gr
RPL23AP88	down_pc9gr
COX17	down_pc9gr
TCF12	down_pc9gr
PRKCD	down_pc9gr
NDUFB4	down_pc9gr
ANTXR2	down_pc9gr
RBM19	down_pc9gr
PPTC7	down_pc9gr
AL079301.1	down_pc9gr
AC068228.1	down_pc9gr
PROSER1	down_pc9gr
TBC1D2B	down_pc9gr
PLEKHG3	down_pc9gr
FRMD6	down_pc9gr
DGKZ	down_pc9gr
FKBP10	down_pc9gr
PCDHGC4	down_pc9gr
SDCBP2-AS1	down_pc9gr
MAN1C1	down_pc9gr
AC013476.1	down_pc9gr
FAM83E	down_pc9gr
CA5BP1	down_pc9gr
MATN3	down_pc9gr
TBC1D20	down_pc9gr
AL109613.1	down_pc9gr
GARNL3	down_pc9gr
PPP1R16A	down_pc9gr
MYO18A	down_pc9gr
AL359715.1	down_pc9gr
USP45	down_pc9gr
TNS1	down_pc9gr
AL442663.3	down_pc9gr
AC020634.1	down_pc9gr
PBOV1	down_pc9gr
RNU6V	down_pc9gr
PFN1P8	down_pc9gr
ARHGAP23	down_pc9gr
ADCY10	down_pc9gr
KLHL32	down_pc9gr
FOXP4	down_pc9gr
CD37	down_pc9gr
SH3BP5L	down_pc9gr
PHBP19	down_pc9gr
TBC1D30	down_pc9gr
CYP3A7	down_pc9gr
HTT	down_pc9gr
AL445931.1	down_pc9gr
HOXC9	down_pc9gr
LINC00582	down_pc9gr
RNU2-51P	down_pc9gr
AC073476.1	down_pc9gr
TDG	down_pc9gr
OGFOD3	down_pc9gr
DCTPP1	down_pc9gr
CAMK2A	down_pc9gr
SNORA66	down_pc9gr
AP001527.2	down_pc9gr
RNU6-817P	down_pc9gr
PPM1L	down_pc9gr
AKR1C8P	down_pc9gr
AC006504.8	down_pc9gr
SOX2-OT	down_pc9gr
C2CD2	down_pc9gr
NKX1-2	down_pc9gr
AL121906.2	down_pc9gr
TLR4	down_pc9gr
DNASE1L2	down_pc9gr
DOCK5	down_pc9gr
DSEL	down_pc9gr
C19orf24	down_pc9gr
AC015909.5	down_pc9gr
SHROOM2	down_pc9gr
AL024508.1	down_pc9gr
AL021707.2	down_pc9gr
PLB1	down_pc9gr
AL355877.2	down_pc9gr
TMEM132B	down_pc9gr
AL662791.1	down_pc9gr
CCDC89	down_pc9gr
AC021106.3	down_pc9gr
URAHP	down_pc9gr
MAMDC2	down_pc9gr
ZNF341	down_pc9gr
PPP1R26-AS1	down_pc9gr
SCG5	down_pc9gr
ATP6V1B1	down_pc9gr
MIR548AC	down_pc9gr
DAAM1	down_pc9gr
MROH1	down_pc9gr
RNF44	down_pc9gr
AC012676.1	down_pc9gr
STEAP3-AS1	down_pc9gr
PTGIS	down_pc9gr
AC090772.1	down_pc9gr
AC078883.4	down_pc9gr
PKP4-AS1	down_pc9gr
AC010536.2	down_pc9gr
PMPCA	down_pc9gr
ZNF785	down_pc9gr
SSC4D	down_pc9gr
GJD3	down_pc9gr
AC004263.1	down_pc9gr
TNRC18P1	down_pc9gr
SLC4A8	down_pc9gr
AC080037.1	down_pc9gr
ZNF718	down_pc9gr
CXADR	down_pc9gr
AL132656.2	down_pc9gr
EPHX3	down_pc9gr
ALDH3A2	down_pc9gr
BOP1	down_pc9gr
AC108206.1	down_pc9gr
P2RX5-TAX1BP3	down_pc9gr
AC022898.2	down_pc9gr
AL157791.2	down_pc9gr
TMEM92	down_pc9gr
AC016396.1	down_pc9gr
ACOT7	down_pc9gr
AC007040.2	down_pc9gr
H3F3B	down_pc9gr
MT-TP	down_pc9gr
ARIH1	down_pc9gr
TP73-AS1	down_pc9gr
LINC01508	down_pc9gr
AL512622.1	down_pc9gr
CPAMD8	down_pc9gr
ZNF275	down_pc9gr
SULT1A2	down_pc9gr
SOWAHB	down_pc9gr
TIAF1	down_pc9gr
FANCA	down_pc9gr
ASAP1	down_pc9gr
AC011411.1	down_pc9gr
BRCC3	down_pc9gr
AP4M1	down_pc9gr
AC007552.1	down_pc9gr
AC009303.2	down_pc9gr
AC080013.3	down_pc9gr
BAG3	down_pc9gr
AC019117.1	down_pc9gr
MVD	down_pc9gr
GCNT2	down_pc9gr
AC015802.4	down_pc9gr
RITA1	down_pc9gr
DRP2	down_pc9gr
AC099677.4	down_pc9gr
SLC9A3R2	down_pc9gr
AL358232.1	down_pc9gr
SMG1	down_pc9gr
AC092338.1	down_pc9gr
PIP5K1C	down_pc9gr
LINC01978	down_pc9gr
TSPAN14	down_pc9gr
AC159540.2	down_pc9gr
SLC2A1	down_pc9gr
NDUFAF4P2	down_pc9gr
CD14	down_pc9gr
SOGA1	down_pc9gr
AL035634.1	down_pc9gr
AC092681.1	down_pc9gr
SPIN2A	down_pc9gr
AC009996.1	down_pc9gr
CRABP2	down_pc9gr
CCDC125	down_pc9gr
ISLR	down_pc9gr
NARF	down_pc9gr
NRL	down_pc9gr
CYP4F2	down_pc9gr
ACSBG1	down_pc9gr
AC010735.2	down_pc9gr
AL627309.2	down_pc9gr
AP005136.1	down_pc9gr
RPL12P20	down_pc9gr
AC004067.1	down_pc9gr
EVI2B	down_pc9gr
CTPS1	down_pc9gr
PLEKHG4B	down_pc9gr
SULT1A3	down_pc9gr
SAA1	down_pc9gr
AC011352.3	down_pc9gr
RC3H2	down_pc9gr
PQLC1	down_pc9gr
AL022097.1	down_pc9gr
LINC01447	down_pc9gr
GLI2	down_pc9gr
MAP1LC3A	down_pc9gr
PPP6C	down_pc9gr
PLEKHD1	down_pc9gr
FNTA	down_pc9gr
ACACB	down_pc9gr
RABGAP1L	down_pc9gr
NMU	down_pc9gr
SEMA4A	down_pc9gr
TIMM23B	down_pc9gr
ARHGDIG	down_pc9gr
KPTN	down_pc9gr
ZNF503-AS2	down_pc9gr
DFFBP1	down_pc9gr
RNU6-1262P	down_pc9gr
AC105036.3	down_pc9gr
RPL23AP24	down_pc9gr
TRIM16L	down_pc9gr
ADM5	down_pc9gr
AC009802.1	down_pc9gr
SCAF4	down_pc9gr
AL390879.1	down_pc9gr
AC116407.2	down_pc9gr
ARTN	down_pc9gr
AC073130.3	down_pc9gr
TMTC2	down_pc9gr
AC124016.2	down_pc9gr
TEX264	down_pc9gr
RTL8A	down_pc9gr
DHCR24	down_pc9gr
AL390198.1	down_pc9gr
MPZL2	down_pc9gr
TMEM204	down_pc9gr
AL031281.2	down_pc9gr
AL355852.1	down_pc9gr
CDH13	down_pc9gr
AL358075.1	down_pc9gr
FASN	down_pc9gr
AC096536.3	down_pc9gr
EDDM13	down_pc9gr
RNU6-1316P	down_pc9gr
CEP170B	down_pc9gr
AC087388.1	down_pc9gr
SRRM1P3	down_pc9gr
SPOPL	down_pc9gr
PACRGL	down_pc9gr
C9orf66	down_pc9gr
AC131212.2	down_pc9gr
DHX30	down_pc9gr
PLCH2	down_pc9gr
PSPN	down_pc9gr
PPP2R1B	down_pc9gr
TANC1	down_pc9gr
NCOA7-AS1	down_pc9gr
C15orf62	down_pc9gr
ZNF527	down_pc9gr
AGAP9	down_pc9gr
TAMM41	down_pc9gr
AC026495.1	down_pc9gr
UNC93B7	down_pc9gr
AL022345.1	down_pc9gr
LINC02038	down_pc9gr
RPL26P27	down_pc9gr
IDSP1	down_pc9gr
AC011676.5	down_pc9gr
BZW1	down_pc9gr
SOS1-IT1	down_pc9gr
CCDC86	down_pc9gr
AC010595.1	down_pc9gr
TPRXL	down_pc9gr
AC010754.1	down_pc9gr
CTRB2	down_pc9gr
AC009948.5	down_pc9gr
TUBA3D	down_pc9gr
RGCC	down_pc9gr
SH3GLB2	down_pc9gr
AL136038.5	down_pc9gr
ANO7	down_pc9gr
AL031118.1	down_pc9gr
AC010894.3	down_pc9gr
TMEM184B	down_pc9gr
AC140134.1	down_pc9gr
AGAP2	down_pc9gr
DOT1L	down_pc9gr
COL13A1	down_pc9gr
ERVW-1	down_pc9gr
AC011442.1	down_pc9gr
TRPM4	down_pc9gr
AC011825.2	down_pc9gr
B3GAT2	down_pc9gr
AC104938.1	down_pc9gr
TMEM86B	down_pc9gr
ARSI	down_pc9gr
ZDHHC18	down_pc9gr
AC007038.2	down_pc9gr
CPSF1	down_pc9gr
RAI1	down_pc9gr
STARD10	down_pc9gr
BCL2L2-PABPN1	down_pc9gr
ADORA1	down_pc9gr
AL445645.1	down_pc9gr
EEF1E1	down_pc9gr
AC005972.1	down_pc9gr
PARP10	down_pc9gr
AC016745.1	down_pc9gr
AC073046.1	down_pc9gr
WBP2	down_pc9gr
ENPP7P1	down_pc9gr
TMEM144	down_pc9gr
AC012676.5	down_pc9gr
SLC46A1	down_pc9gr
COX7A1	down_pc9gr
AL590235.1	down_pc9gr
KCNC4	down_pc9gr
TMEM220	down_pc9gr
CPTP	down_pc9gr
AL359715.2	down_pc9gr
DNAJB12	down_pc9gr
CHERP	down_pc9gr
MYO1G	down_pc9gr
AC018714.1	down_pc9gr
AC018690.1	down_pc9gr
AP000254.1	down_pc9gr
EDN2	down_pc9gr
AC099343.2	down_pc9gr
TCEAL3-AS1	down_pc9gr
RUSC1-AS1	down_pc9gr
AC008537.3	down_pc9gr
Z95114.3	down_pc9gr
ANKRD1	down_pc9gr
DDR1	down_pc9gr
ATP6V1D	down_pc9gr
PTGS1	down_pc9gr
AL161452.1	down_pc9gr
LRP2BP	down_pc9gr
MEIOC	down_pc9gr
RBFA	down_pc9gr
C18orf54	down_pc9gr
AL034346.1	down_pc9gr
DENND2D	down_pc9gr
AC012615.6	down_pc9gr
FXYD3	down_pc9gr
AL160006.1	down_pc9gr
FBXO10	down_pc9gr
WDR66	down_pc9gr
SLC25A5-AS1	down_pc9gr
DLG3-AS1	down_pc9gr
GCSH	down_pc9gr
AL122035.2	down_pc9gr
AC022762.2	down_pc9gr
SOD2	down_pc9gr
CYTH1	down_pc9gr
NOSTRIN	down_pc9gr
AC087482.1	down_pc9gr
HERC2P2	down_pc9gr
FIBCD1	down_pc9gr
CMPK2	down_pc9gr
AC078909.2	down_pc9gr
LRGUK	down_pc9gr
PRDM2	down_pc9gr
RRN3P2	down_pc9gr
SHROOM1	down_pc9gr
BECN2	down_pc9gr
C2CD3	down_pc9gr
MMP15	down_pc9gr
NCDN	down_pc9gr
AL136418.1	down_pc9gr
TMEM104	down_pc9gr
LRRC8A	down_pc9gr
ZBED1	down_pc9gr
ANKRD49	down_pc9gr
AC018553.1	down_pc9gr
EML3	down_pc9gr
AP000344.2	down_pc9gr
COMMD5	down_pc9gr
HDHD2	down_pc9gr
IGDCC3	down_pc9gr
AC022400.5	down_pc9gr
FAM221B	down_pc9gr
CR392039.1	down_pc9gr
CAMSAP1	down_pc9gr
IGLJCOR18	down_pc9gr
AC132219.2	down_pc9gr
AHRR	down_pc9gr
ZDHHC11B	down_pc9gr
ZNF324	down_pc9gr
ENTPD7	down_pc9gr
AC113382.1	down_pc9gr
FARSA-AS1	down_pc9gr
AL606834.2	down_pc9gr
TGFB2-AS1	down_pc9gr
PFN1P2	down_pc9gr
UCN2	down_pc9gr
DPYSL4	down_pc9gr
BICD1	down_pc9gr
TPTE2	down_pc9gr
RAB11FIP4	down_pc9gr
IQANK1	down_pc9gr
HOXA5	down_pc9gr
RN7SL181P	down_pc9gr
FPGT-TNNI3K	down_pc9gr
RTL8C	down_pc9gr
AP001029.3	down_pc9gr
ZNF750	down_pc9gr
FAM122B	down_pc9gr
MAP3K6	down_pc9gr
PPP6R2	down_pc9gr
AL133481.1	down_pc9gr
AC073264.3	down_pc9gr
UNKL	down_pc9gr
RAVER1	down_pc9gr
PLA2G10	down_pc9gr
TMEM134	down_pc9gr
ALDH5A1	down_pc9gr
FBRS	down_pc9gr
SPATA24	down_pc9gr
AC026367.2	down_pc9gr
TBC1D24	down_pc9gr
PTPN23	down_pc9gr
DGCR8	down_pc9gr
BRI3BP	down_pc9gr
PLBD2	down_pc9gr
SLC12A7	down_pc9gr
FBXO34	down_pc9gr
PCDH12	down_pc9gr
F2RL2	down_pc9gr
TELO2	down_pc9gr
PNPLA3	down_pc9gr
PCDHB14	down_pc9gr
CSNK1E	down_pc9gr
AL136038.4	down_pc9gr
ARL17B	down_pc9gr
PAX6	down_pc9gr
AC015799.1	down_pc9gr
AC002553.1	down_pc9gr
AC087742.1	down_pc9gr
LRP8	down_pc9gr
AC012313.1	down_pc9gr
SCARA3	down_pc9gr
PPP1R36	down_pc9gr
HCFC2	down_pc9gr
PRDM10	down_pc9gr
SRGAP1	down_pc9gr
RNU2-7P	down_pc9gr
C15orf39	down_pc9gr
AC009041.4	down_pc9gr
TARDBP	down_pc9gr
LRP1-AS	down_pc9gr
AC080112.3	down_pc9gr
PLXNB2	down_pc9gr
NSFL1C	down_pc9gr
HEY1	down_pc9gr
CANT1	down_pc9gr
CROCCP2	down_pc9gr
SLC7A7	down_pc9gr
TMEM64	down_pc9gr
DNAH8	down_pc9gr
PCDHGA11	down_pc9gr
AC137936.2	down_pc9gr
TOMM5	down_pc9gr
SLC41A1	down_pc9gr
AL021154.1	down_pc9gr
AC012447.1	down_pc9gr
AC026401.3	down_pc9gr
AC010973.2	down_pc9gr
TNRC6C-AS1	down_pc9gr
TCF20	down_pc9gr
FAM178B	down_pc9gr
CNIH1	down_pc9gr
GPR63	down_pc9gr
MROH6	down_pc9gr
UST	down_pc9gr
RAI1-AS1	down_pc9gr
Z98257.1	down_pc9gr
SNORA71C	down_pc9gr
FUT2	down_pc9gr
AATBC	down_pc9gr
IRF9	down_pc9gr
AL358852.1	down_pc9gr
MYO1D	down_pc9gr
AC008735.2	down_pc9gr
GAPDHP16	down_pc9gr
DIO3OS	down_pc9gr
SMAD6	down_pc9gr
AL121890.5	down_pc9gr
HNRNPUL2-BSCL2	down_pc9gr
MEF2C	down_pc9gr
ACTR3	down_pc9gr
AC007610.2	down_pc9gr
ZNF485	down_pc9gr
RN7SL650P	down_pc9gr
HOXC13	down_pc9gr
SPATA5L1	down_pc9gr
NDST1	down_pc9gr
AC114402.2	down_pc9gr
BCO2	down_pc9gr
ACACA	down_pc9gr
ABCG1	down_pc9gr
MAGEE1	down_pc9gr
CTIF	down_pc9gr
ZNF154	down_pc9gr
SLC35B2	down_pc9gr
AL080317.2	down_pc9gr
CTSW	down_pc9gr
AC073575.1	down_pc9gr
AC091133.5	down_pc9gr
SLC25A44	down_pc9gr
LRRC4	down_pc9gr
CS	down_pc9gr
ECE2	down_pc9gr
OVGP1	down_pc9gr
FADS2	down_pc9gr
SCOCP1	down_pc9gr
THBD	down_pc9gr
AC010326.3	down_pc9gr
AC007292.1	down_pc9gr
ZC3H12A	down_pc9gr
PLEKHA3	down_pc9gr
AP000345.2	down_pc9gr
AC104115.2	down_pc9gr
SCD	down_pc9gr
ROR1-AS1	down_pc9gr
NT5DC3	down_pc9gr
N6AMT1	down_pc9gr
AL359711.2	down_pc9gr
HSPA1A	down_pc9gr
DAPK2	down_pc9gr
AC091132.5	down_pc9gr
U2AF1	down_pc9gr
FUT8-AS1	down_pc9gr
AL445187.1	down_pc9gr
CREBZF	down_pc9gr
AC109460.2	down_pc9gr
SKA1	down_pc9gr
AC007956.1	down_pc9gr
AC068282.1	down_pc9gr
ZCCHC14	down_pc9gr
AL157700.1	down_pc9gr
TVP23CP1	down_pc9gr
HOXC13-AS	down_pc9gr
AC092338.2	down_pc9gr
DUSP8P5	down_pc9gr
NCS1	down_pc9gr
FAM172BP	down_pc9gr
NFIX	down_pc9gr
USP21	down_pc9gr
AC013451.2	down_pc9gr
GPR34	down_pc9gr
AC090948.1	down_pc9gr
MIR429	down_pc9gr
SLC20A1	down_pc9gr
AC116914.2	down_pc9gr
AC090409.1	down_pc9gr
SOCS5P4	down_pc9gr
B3GALNT1P1	down_pc9gr
LYNX1	down_pc9gr
TMEM92-AS1	down_pc9gr
AC021945.1	down_pc9gr
SLC29A2	down_pc9gr
NHSL1	down_pc9gr
AC009078.3	down_pc9gr
AC005014.2	down_pc9gr
AC004832.4	down_pc9gr
AL031846.2	down_pc9gr
AC009303.1	down_pc9gr
SLC25A28	down_pc9gr
AL049780.3	down_pc9gr
ZBTB44	down_pc9gr
SUMO4	down_pc9gr
ACTBP1	down_pc9gr
RGPD1	down_pc9gr
PRSS36	down_pc9gr
CFP	down_pc9gr
TBCD	down_pc9gr
AC073413.1	down_pc9gr
PANK4	down_pc9gr
RECQL4	down_pc9gr
DPAGT1	down_pc9gr
AL353807.1	down_pc9gr
ZFP57	down_pc9gr
RSPH9	down_pc9gr
FJX1	down_pc9gr
CLCF1	down_pc9gr
AL391280.1	down_pc9gr
SLC27A5	down_pc9gr
MTND4P9	down_pc9gr
CHKB-CPT1B	down_pc9gr
AL138820.1	down_pc9gr
GAPDHS	down_pc9gr
CYP26A1	down_pc9gr
GNAL	down_pc9gr
TPRG1L	down_pc9gr
IMP4	down_pc9gr
CERK	down_pc9gr
IKBKGP1	down_pc9gr
MRPL38	down_pc9gr
LRRN2	down_pc9gr
POLR3K	down_pc9gr
HSD11B2	down_pc9gr
AC011466.3	down_pc9gr
RPS12P20	down_pc9gr
TMEM250	down_pc9gr
SCUBE3	down_pc9gr
ZNF345	down_pc9gr
TMEM63C	down_pc9gr
FGF17	down_pc9gr
RIN2	down_pc9gr
MFSD11	down_pc9gr
OTUD3	down_pc9gr
RWDD4	down_pc9gr
AC102945.1	down_pc9gr
RGL1	down_pc9gr
PALM2	down_pc9gr
AC017074.1	down_pc9gr
INPP5J	down_pc9gr
CBFA2T2	down_pc9gr
AP000919.1	down_pc9gr
AC078883.3	down_pc9gr
AP001885.1	down_pc9gr
SPDYE5	down_pc9gr
BMS1P2	down_pc9gr
PLA2G6	down_pc9gr
MRPS28	down_pc9gr
SYTL4	down_pc9gr
BMP8A	down_pc9gr
AC006058.3	down_pc9gr
MFSD13B	down_pc9gr
AC022400.1	down_pc9gr
C5orf46	down_pc9gr
UCA1	down_pc9gr
AC025678.3	down_pc9gr
HIF1A-AS2	down_pc9gr
AC007000.3	down_pc9gr
DHCR7	down_pc9gr
CFLAR-AS1	down_pc9gr
PPP1R14D	down_pc9gr
KRT18P7	down_pc9gr
AP001094.3	down_pc9gr
FRMD4A	down_pc9gr
WWOX	down_pc9gr
EBAG9P1	down_pc9gr
AC020978.9	down_pc9gr
FBXO25	down_pc9gr
AC093458.2	down_pc9gr
DTX4	down_pc9gr
AC094019.1	down_pc9gr
LRFN4	down_pc9gr
AC211476.2	down_pc9gr
LDLRAP1	down_pc9gr
STIM2	down_pc9gr
HS1BP3-IT1	down_pc9gr
ANKRD36C	down_pc9gr
ANKRD26P4	down_pc9gr
AL022326.1	down_pc9gr
UBXN11	down_pc9gr
C19orf73	down_pc9gr
SHB	down_pc9gr
ZNF573	down_pc9gr
SLC43A2	down_pc9gr
ZNF616	down_pc9gr
AL110118.2	down_pc9gr
AC079414.3	down_pc9gr
SETD1B	down_pc9gr
SNRNP35	down_pc9gr
NRIP2	down_pc9gr
RIC8B	down_pc9gr
AL031666.3	down_pc9gr
KIAA1024	down_pc9gr
LOX	down_pc9gr
RAD21-AS1	down_pc9gr
PALD1	down_pc9gr
FAM53B	down_pc9gr
USP36	down_pc9gr
PRKCH	down_pc9gr
VN1R108P	down_pc9gr
WDR90	down_pc9gr
AC112236.2	down_pc9gr
AC004975.1	down_pc9gr
RBP3	down_pc9gr
NHLH1	down_pc9gr
TIMM17B	down_pc9gr
AP000487.1	down_pc9gr
SREBF1	down_pc9gr
AC004160.1	down_pc9gr
MIR3192	down_pc9gr
AC005077.4	down_pc9gr
FBXO28	down_pc9gr
BACH2	down_pc9gr
RNF123	down_pc9gr
ZUFSP	down_pc9gr
MUM1	down_pc9gr
SYT16	down_pc9gr
AC103706.1	down_pc9gr
AL079307.1	down_pc9gr
AC007216.3	down_pc9gr
TRMT61A	down_pc9gr
AC107398.3	down_pc9gr
AL662907.2	down_pc9gr
C1QTNF1	down_pc9gr
TRADD	down_pc9gr
AL357153.2	down_pc9gr
IL20RB-AS1	down_pc9gr
SCN3B	down_pc9gr
RNY1P9	down_pc9gr
DIO3	down_pc9gr
MIR3677	down_pc9gr
BTLA	down_pc9gr
RDH13	down_pc9gr
AC004466.1	down_pc9gr
KLHDC4	down_pc9gr
AC084033.1	down_pc9gr
AFAP1-AS1	down_pc9gr
DUSP7	down_pc9gr
AC108002.1	down_pc9gr
DLSTP1	down_pc9gr
AC008764.2	down_pc9gr
AC084125.2	down_pc9gr
TAF7L	down_pc9gr
BDNF	down_pc9gr
CYP2F2P	down_pc9gr
EFHD1	down_pc9gr
AC018665.1	down_pc9gr
AC011815.3	down_pc9gr
AC005632.3	down_pc9gr
RAB26	down_pc9gr
AC090058.1	down_pc9gr
C1orf21	down_pc9gr
TMEM165	down_pc9gr
AC016745.2	down_pc9gr
PBRM1	down_pc9gr
SLC25A25-AS1	down_pc9gr
SERINC2	down_pc9gr
SNAPC4	down_pc9gr
KRT87P	down_pc9gr
HS6ST2	down_pc9gr
HSF4	down_pc9gr
SPEN	down_pc9gr
AL353804.1	down_pc9gr
FRAT2	down_pc9gr
TULP4	down_pc9gr
PAPPA2	down_pc9gr
ARAP3	down_pc9gr
LINC01123	down_pc9gr
AC092718.1	down_pc9gr
DHRS3	down_pc9gr
AC092437.1	down_pc9gr
IL12A	down_pc9gr
RAET1E-AS1	down_pc9gr
SSNA1	down_pc9gr
LRRC37A15P	down_pc9gr
AP000692.1	down_pc9gr
MX2	down_pc9gr
AC008481.2	down_pc9gr
HSP90AA1	down_pc9gr
PHLPP1	down_pc9gr
AC026367.3	down_pc9gr
PHACTR4	down_pc9gr
BRD9	down_pc9gr
AC087163.2	down_pc9gr
AC002076.1	down_pc9gr
NBEAL2	down_pc9gr
NPHP4	down_pc9gr
AL356801.1	down_pc9gr
ANKRD39	down_pc9gr
AC073320.1	down_pc9gr
AC127496.7	down_pc9gr
FBXW5	down_pc9gr
AC091544.5	down_pc9gr
GRIN1	down_pc9gr
ZNF302	down_pc9gr
LIMCH1	down_pc9gr
HOOK2	down_pc9gr
GLUL	down_pc9gr
PRKD1	down_pc9gr
RAPGEF3	down_pc9gr
DDX3P1	down_pc9gr
TGOLN2	down_pc9gr
BCAS1	down_pc9gr
SORD	down_pc9gr
SLC25A33	down_pc9gr
TRRAP	down_pc9gr
SERHL2	down_pc9gr
NPR2	down_pc9gr
AC012213.3	down_pc9gr
CICP14	down_pc9gr
CFAP161	down_pc9gr
ARHGEF1	down_pc9gr
YLPM1	down_pc9gr
IL16	down_pc9gr
TCF3	down_pc9gr
AL121790.1	down_pc9gr
AC090833.1	down_pc9gr
AC120049.1	down_pc9gr
AC069544.1	down_pc9gr
AC124319.2	down_pc9gr
WNT5A-AS1	down_pc9gr
LINC01290	down_pc9gr
HSPA1B	down_pc9gr
CCDC146	down_pc9gr
ZNF488	down_pc9gr
AC112220.2	down_pc9gr
TMEM145	down_pc9gr
SF3B4	down_pc9gr
SEMA5A	down_pc9gr
Z94721.2	down_pc9gr
IGFBP4	down_pc9gr
PRKXP1	down_pc9gr
AL136980.1	down_pc9gr
AC137932.2	down_pc9gr
MTND5P42	down_pc9gr
SLC4A11	down_pc9gr
PGM3	down_pc9gr
IL10RB-AS1	down_pc9gr
AL136084.2	down_pc9gr
ADGRA3	down_pc9gr
ZNF33A	down_pc9gr
SLC52A2	down_pc9gr
AMD1	down_pc9gr
AC010203.2	down_pc9gr
Z82217.1	down_pc9gr
AL591848.3	down_pc9gr
LMBR1	down_pc9gr
AP000697.1	down_pc9gr
GFOD2	down_pc9gr
AL136038.3	down_pc9gr
COPS7A	down_pc9gr
AC084346.1	down_pc9gr
RRP7A	down_pc9gr
SLC25A14	down_pc9gr
RELT	down_pc9gr
AC138951.2	down_pc9gr
KIAA1211L	down_pc9gr
SHBG	down_pc9gr
TOR3A	down_pc9gr
PREP	down_pc9gr
AL355987.5	down_pc9gr
CSNK1A1P1	down_pc9gr
SERPINE3	down_pc9gr
FOXD4L1	down_pc9gr
AC022154.1	down_pc9gr
AP002807.1	down_pc9gr
CHST11	down_pc9gr
RNF39	down_pc9gr
GSTM4	down_pc9gr
DOHH	down_pc9gr
CENPX	down_pc9gr
TSN	down_pc9gr
TATDN2P2	down_pc9gr
AC244093.5	down_pc9gr
NMNAT2	down_pc9gr
RBBP6	down_pc9gr
GGN	down_pc9gr
PCAT1	down_pc9gr
DTNB	down_pc9gr
CYP2T1P	down_pc9gr
UPK3B	down_pc9gr
KLHL21	down_pc9gr
AC131212.3	down_pc9gr
SHH	down_pc9gr
ENO4	down_pc9gr
MKLN1	down_pc9gr
SLC29A3	down_pc9gr
MCM10	down_pc9gr
ELF4	down_pc9gr
SCNN1B	down_pc9gr
AC120114.2	down_pc9gr
AC005014.3	down_pc9gr
KMT2B	down_pc9gr
NPNT	down_pc9gr
NUTM2B-AS1	down_pc9gr
SGO1	down_pc9gr
CHPF2	down_pc9gr
AL121832.3	down_pc9gr
PCSK9	down_pc9gr
RN7SKP16	down_pc9gr
SNORD62B	down_pc9gr
PDXP	down_pc9gr
APOM	down_pc9gr
ZNF611	down_pc9gr
EFR3B	down_pc9gr
PPARD	down_pc9gr
AC027514.2	down_pc9gr
AC087500.1	down_pc9gr
ASH1L-AS1	down_pc9gr
DRC3	down_pc9gr
AC005962.1	down_pc9gr
AL160394.1	down_pc9gr
SLC44A3	down_pc9gr
KIAA0513	down_pc9gr
AC087276.1	down_pc9gr
SPRY1	down_pc9gr
HOXC4	down_pc9gr
C14orf37	down_pc9gr
PDP2	down_pc9gr
HERC2P3	down_pc9gr
AC020978.4	down_pc9gr
AL590666.1	down_pc9gr
HS6ST1	down_pc9gr
MIR3605	down_pc9gr
AC112722.1	down_pc9gr
AC103681.2	down_pc9gr
MIR339	down_pc9gr
AC010226.1	down_pc9gr
WASH5P	down_pc9gr
HERC2P9	down_pc9gr
AC092535.1	down_pc9gr
LINC00598	down_pc9gr
U73169.1	down_pc9gr
LINC01752	down_pc9gr
STPG2	down_pc9gr
AL442128.2	down_pc9gr
L3HYPDH	down_pc9gr
AC006518.1	down_pc9gr
TMEM41A	down_pc9gr
AL135999.1	down_pc9gr
CASKIN2	down_pc9gr
CICP8	down_pc9gr
AC012354.3	down_pc9gr
GATA2	down_pc9gr
ZNF668	down_pc9gr
TMEM50A	down_pc9gr
TTC14	down_pc9gr
PLEKHF1	down_pc9gr
ZFYVE27	down_pc9gr
SLC25A1P5	down_pc9gr
SEMA3F	down_pc9gr
FAM46C	down_pc9gr
ST6GAL1	down_pc9gr
HMGCS1	down_pc9gr
HMGN1P15	down_pc9gr
HOXA6	down_pc9gr
SNORA16B	down_pc9gr
ACTN1	down_pc9gr
AC012513.2	down_pc9gr
ROR1	down_pc9gr
GJB4	down_pc9gr
PTMAP1	down_pc9gr
ITGAL	down_pc9gr
CHST3	down_pc9gr
MAP3K9	down_pc9gr
AL590369.1	down_pc9gr
LINC02078	down_pc9gr
ACKR3	down_pc9gr
HOPX	down_pc9gr
FAM174B	down_pc9gr
CDC25A	down_pc9gr
TGFB2	down_pc9gr
MDFIC	down_pc9gr
AC004596.1	down_pc9gr
RNU6-8	down_pc9gr
AL596244.1	down_pc9gr
UNC5B	down_pc9gr
CHSY1	down_pc9gr
AC025871.1	down_pc9gr
DGKH	down_pc9gr
TMEM30B	down_pc9gr
ARFGEF3	down_pc9gr
FAM83A-AS1	down_pc9gr
AC002064.1	down_pc9gr
NCF2	down_pc9gr
PAX9	down_pc9gr
BCL9	down_pc9gr
PDXK	down_pc9gr
IFFO2	down_pc9gr
PRMT2	down_pc9gr
AC091167.4	down_pc9gr
TP53INP2	down_pc9gr
BCL9L	down_pc9gr
PITRM1-AS1	down_pc9gr
AP001350.1	down_pc9gr
AC139149.1	down_pc9gr
AP005899.1	down_pc9gr
AC013451.1	down_pc9gr
AP001625.2	down_pc9gr
SYNGR2	down_pc9gr
SLC43A3	down_pc9gr
AC069499.1	down_pc9gr
RNU1-67P	down_pc9gr
AC008735.1	down_pc9gr
AC004706.1	down_pc9gr
GLB1L2	down_pc9gr
PDGFB	down_pc9gr
RFX1	down_pc9gr
ADAMTS14	down_pc9gr
P2RY2	down_pc9gr
CTBP1-AS	down_pc9gr
RNU4ATAC18P	down_pc9gr
AC007191.1	down_pc9gr
DHX37	down_pc9gr
CCDC160	down_pc9gr
ASB16	down_pc9gr
ARMC10	down_pc9gr
MED16	down_pc9gr
SRSF9P1	down_pc9gr
AC009119.2	down_pc9gr
KLHL25	down_pc9gr
AC011491.2	down_pc9gr
AC112497.1	down_pc9gr
BRD1	down_pc9gr
PSTPIP2	down_pc9gr
L1CAM	down_pc9gr
SRCIN1	down_pc9gr
LINC01128	down_pc9gr
PCDHA10	down_pc9gr
INSIG2	down_pc9gr
SNORA55	down_pc9gr
RCCD1	down_pc9gr
TTC31	down_pc9gr
CACNB4	down_pc9gr
CFL1P3	down_pc9gr
AC036108.1	down_pc9gr
CNIH2	down_pc9gr
NOL12	down_pc9gr
AC027575.2	down_pc9gr
LYG2	down_pc9gr
DHPS	down_pc9gr
FFAR4	down_pc9gr
MIR200A	down_pc9gr
PPME1	down_pc9gr
SDK1	down_pc9gr
FUT9	down_pc9gr
HELLPAR	down_pc9gr
CAVIN4	down_pc9gr
AZGP1	down_pc9gr
AC234781.1	down_pc9gr
DBF4B	down_pc9gr
RAD54L	down_pc9gr
PLAGL2	down_pc9gr
TMEM109	down_pc9gr
AC027288.1	down_pc9gr
COL18A1-AS1	down_pc9gr
SFTPB	down_pc9gr
SEMA4G	down_pc9gr
SLC47A2	down_pc9gr
ST14	down_pc9gr
AC099518.2	down_pc9gr
WDR97	down_pc9gr
MSRA	down_pc9gr
LINC01505	down_pc9gr
UBA52P6	down_pc9gr
CYB5RL	down_pc9gr
INSR	down_pc9gr
SMG1P1	down_pc9gr
CHD5	down_pc9gr
AC011445.1	down_pc9gr
QSER1	down_pc9gr
PRR12	down_pc9gr
AC116913.1	down_pc9gr
AC120114.4	down_pc9gr
MAK	down_pc9gr
AC013444.1	down_pc9gr
C10orf82	down_pc9gr
CTHRC1	down_pc9gr
SNORA22B	down_pc9gr
RASGRF2	down_pc9gr
AC087749.1	down_pc9gr
KANTR	down_pc9gr
ADD3-AS1	down_pc9gr
ADAMTSL3	down_pc9gr
SYTL3	down_pc9gr
UGT1A3	down_pc9gr
CYP3A4	down_pc9gr
PISD	down_pc9gr
CENPM	down_pc9gr
MIGA2	down_pc9gr
SLC51A	down_pc9gr
PLCE1-AS2	down_pc9gr
LINC01252	down_pc9gr
S100A9	down_pc9gr
RPS3P2	down_pc9gr
CMTM8	down_pc9gr
CLUH	down_pc9gr
SYCP3	down_pc9gr
AATK	down_pc9gr
ZNF852	down_pc9gr
AL031587.5	down_pc9gr
AC127070.4	down_pc9gr
AL136531.3	down_pc9gr
HSPA1L	down_pc9gr
AP000523.1	down_pc9gr
NPC2	down_pc9gr
PTK2	down_pc9gr
LAMP3	down_pc9gr
FAM98B	down_pc9gr
HSP90AB2P	down_pc9gr
AC092375.2	down_pc9gr
TRIM29	down_pc9gr
CDS1	down_pc9gr
OTUD6B	down_pc9gr
TMEM117	down_pc9gr
AL157938.2	down_pc9gr
C3orf52	down_pc9gr
TMEM33	down_pc9gr
ITFG2	down_pc9gr
AC020937.1	down_pc9gr
NR2C2	down_pc9gr
TBX2-AS1	down_pc9gr
KRT17	down_pc9gr
AP002907.1	down_pc9gr
AC103810.2	down_pc9gr
ZFP41	down_pc9gr
AC253576.2	down_pc9gr
AC104066.1	down_pc9gr
C12orf65	down_pc9gr
LRRC42	down_pc9gr
ZNF649	down_pc9gr
UBALD1	down_pc9gr
AL121672.2	down_pc9gr
AC007938.1	down_pc9gr
AC027020.1	down_pc9gr
AGAP4	down_pc9gr
PPP1R32	down_pc9gr
TOX	down_pc9gr
AC009690.2	down_pc9gr
AL359094.1	down_pc9gr
CLN6	down_pc9gr
LRIG1	down_pc9gr
TMC6	down_pc9gr
TGFB1	down_pc9gr
AC005722.2	down_pc9gr
C1orf220	down_pc9gr
RPL23AP64	down_pc9gr
VN1R51P	down_pc9gr
HYAL2	down_pc9gr
IGFBP5	down_pc9gr
MEGF6	down_pc9gr
ZBTB24	down_pc9gr
AC008592.5	down_pc9gr
DUSP23	down_pc9gr
AC008494.2	down_pc9gr
C9orf116	down_pc9gr
EIF4EBP1P1	down_pc9gr
NR3C2	down_pc9gr
PDZK1IP1	down_pc9gr
TTC19	down_pc9gr
RNU7-171P	down_pc9gr
ZMYND19	down_pc9gr
PM20D1	down_pc9gr
TBC1D22A-AS1	down_pc9gr
AC004000.1	down_pc9gr
AC020659.1	down_pc9gr
CORT	down_pc9gr
DDX31	down_pc9gr
GTF2A2	down_pc9gr
RCHY1	down_pc9gr
AC009032.1	down_pc9gr
AC009120.2	down_pc9gr
MIR1249	down_pc9gr
ARHGEF28	down_pc9gr
AGAP6	down_pc9gr
SLC2A6	down_pc9gr
CENPS-CORT	down_pc9gr
AC005740.4	down_pc9gr
AL513327.1	down_pc9gr
ZNF880	down_pc9gr
NOX5	down_pc9gr
LINC00115	down_pc9gr
PID1	down_pc9gr
AL118516.1	down_pc9gr
MTAP	down_pc9gr
LOXL1-AS1	down_pc9gr
AC008781.2	down_pc9gr
SNRK	down_pc9gr
AC008915.2	down_pc9gr
BLZF2P	down_pc9gr
KRTAP3-3	down_pc9gr
PHLDA2	down_pc9gr
KRT7	down_pc9gr
AC018695.2	down_pc9gr
CYSRT1	down_pc9gr
COL4A1	down_pc9gr
AL022328.1	down_pc9gr
ENTPD1	down_pc9gr
AC092718.2	down_pc9gr
SETD1A	down_pc9gr
RNA5SP219	down_pc9gr
DUTP1	down_pc9gr
PIAS4	down_pc9gr
HSBP1L1	down_pc9gr
ELMSAN1	down_pc9gr
AL023806.3	down_pc9gr
ECT2L	down_pc9gr
UBFD1	down_pc9gr
PTPRU	down_pc9gr
ZNF418	down_pc9gr
AC093525.7	down_pc9gr
BAALC	down_pc9gr
TLR2	down_pc9gr
AC021491.4	down_pc9gr
ESR2	down_pc9gr
AC087683.2	down_pc9gr
KAT7	down_pc9gr
GATC	down_pc9gr
AC016586.1	down_pc9gr
CDK3	down_pc9gr
VGLL4	down_pc9gr
PLOD1	down_pc9gr
RYR3	down_pc9gr
FSCN2	down_pc9gr
KIAA0141	down_pc9gr
ADAM5	down_pc9gr
AL157786.1	down_pc9gr
RNF208	down_pc9gr
PLK1	down_pc9gr
AC005476.2	down_pc9gr
MGAT5	down_pc9gr
MYH9	down_pc9gr
RAP1GAP	down_pc9gr
AC023906.4	down_pc9gr
AC131532.1	down_pc9gr
TBX2	down_pc9gr
AC073254.1	down_pc9gr
AC007686.3	down_pc9gr
ARGFXP2	down_pc9gr
PTRH1	down_pc9gr
AC026356.2	down_pc9gr
ARF1	down_pc9gr
AL008718.3	down_pc9gr
NT5C	down_pc9gr
DTX1	down_pc9gr
CACNG4	down_pc9gr
FOXO6	down_pc9gr
CRY1	down_pc9gr
CUZD1	down_pc9gr
RPL12P44	down_pc9gr
DDX42	down_pc9gr
FBLN1	down_pc9gr
AL513320.1	down_pc9gr
LTB4R2	down_pc9gr
AC015802.6	down_pc9gr
RPEP4	down_pc9gr
AL132639.3	down_pc9gr
AC009237.14	down_pc9gr
SARM1	down_pc9gr
PRR25	down_pc9gr
KLHL35	down_pc9gr
RAB11FIP3	down_pc9gr
CYB561D2	down_pc9gr
SIPA1L3	down_pc9gr
AC090241.3	down_pc9gr
AC007014.1	down_pc9gr
CICP27	down_pc9gr
OBSCN	down_pc9gr
CYYR1	down_pc9gr
AJ239328.1	down_pc9gr
SEMA6A-AS1	down_pc9gr
AC092135.3	down_pc9gr
FP236383.1	down_pc9gr
AC022150.2	down_pc9gr
AL139095.3	down_pc9gr
ZG16B	down_pc9gr
ZFP82	down_pc9gr
DIS3L2	down_pc9gr
ABHD17C	down_pc9gr
LINC00106	down_pc9gr
TBX15	down_pc9gr
AL450306.1	down_pc9gr
GTF2IP7	down_pc9gr
FAM87B	down_pc9gr
SEMA6A	down_pc9gr
PDCD2	down_pc9gr
TMEM14EP	down_pc9gr
IDH3A	down_pc9gr
RANBP3	down_pc9gr
GYG1P3	down_pc9gr
BAG6	down_pc9gr
MMP28	down_pc9gr
TRABD	down_pc9gr
MKRN2OS	down_pc9gr
LAYN	down_pc9gr
AC110079.2	down_pc9gr
AL049552.1	down_pc9gr
AC092611.1	down_pc9gr
BRIP1	down_pc9gr
KCNAB2	down_pc9gr
MCM9	down_pc9gr
IQSEC3P1	down_pc9gr
AC091390.1	down_pc9gr
KHDRBS3	down_pc9gr
PPIF	down_pc9gr
CSAD	down_pc9gr
AC105389.2	down_pc9gr
ATPAF1	down_pc9gr
ATP1B3-AS1	down_pc9gr
AC107398.2	down_pc9gr
AL390728.4	down_pc9gr
FGFR1OP	down_pc9gr
AC007066.2	down_pc9gr
MFSD12	down_pc9gr
RILP	down_pc9gr
B4GALT3	down_pc9gr
ALG3	down_pc9gr
SNX18P3	down_pc9gr
C19orf57	down_pc9gr
TSACC	down_pc9gr
AC021016.2	down_pc9gr
RNU7-160P	down_pc9gr
AC017104.3	down_pc9gr
QSOX1	down_pc9gr
PCDHB18P	down_pc9gr
AL590666.2	down_pc9gr
MIR6512	down_pc9gr
LPCAT3	down_pc9gr
TLL1	down_pc9gr
AC116618.1	down_pc9gr
ZNF845	down_pc9gr
SEMA4C	down_pc9gr
DGKZP1	down_pc9gr
KRT18P15	down_pc9gr
random_gene	down_pc9gr
C9orf152	down_pc9gr
PNMA1	down_pc9gr
TRAF3IP2-AS1	down_pc9gr
BX324167.2	down_pc9gr
C10orf90	down_pc9gr
ERCC5	down_pc9gr
AL390208.1	down_pc9gr
AP003559.1	down_pc9gr
PDCL3	down_pc9gr
AP002840.2	down_pc9gr
AEN	down_pc9gr
DECR1	down_pc9gr
CADM4	down_pc9gr
AC027601.5	down_pc9gr
AL122010.1	down_pc9gr
LMAN1	down_pc9gr
DDB1	down_pc9gr
MYO9B	down_pc9gr
MMP7	down_pc9gr
CRNKL1	down_pc9gr
RF02246	down_pc9gr
CENPQ	down_pc9gr
ZBTB12	down_pc9gr
DTNBP1	down_pc9gr
ZAR1L	down_pc9gr
AC036103.1	down_pc9gr
KBTBD8	down_pc9gr
ZEB1	down_pc9gr
ZG16	down_pc9gr
AL133215.3	down_pc9gr
FAT4	down_pc9gr
MIER1	down_pc9gr
BANK1	down_pc9gr
SPIN2B	down_pc9gr
PIR	down_pc9gr
AC112694.1	down_pc9gr
SORL1	down_pc9gr
CHD1	down_pc9gr
SERPINF1	down_pc9gr
WDR34	down_pc9gr
CDC25B	down_pc9gr
BMP3	down_pc9gr
HIGD1B	down_pc9gr
SLC25A46	down_pc9gr
CD160	down_pc9gr
CPNE4	down_pc9gr
ALDOC	down_pc9gr
PDCD4	down_pc9gr
CEP350	down_pc9gr
AC107032.2	down_pc9gr
STK17A	down_pc9gr
ABR	down_pc9gr
FOXE1	down_pc9gr
RF00569	down_pc9gr
LINC01121	down_pc9gr
AC008115.4	down_pc9gr
[truncated: 17,634 more rows]

## Sheet: E_VD-Results_DownPC9UpMLN
Names	total	Gene ID
#1DownPC9GR #4UpMLN	1943	PXYLP1
		RTN1
		SALRNA1
		AC005674.2
		AC126118.1
		AC126755.2
		AL691482.3
		AL596218.1
		AP000867.2
		GTPBP1
		ZNF83
		CST7
		DCAF4L1
		CFAP157
		CHST15
		TRAPPC9
		PLXNA1
		LINC02334
		AC005786.2
		AC112487.1
		SNAPC1
		TTLL4
		SLC9A3R1
		UBE2W
		NOP53-AS1
		LPIN3
		AL008582.1
		AL023284.4
		LDLR
		GPATCH8
		HSPA2
		TACR2
		LINC01619
		AC027313.1
		AC103591.3
		PLAC8L1
		SDR39U1
		PIGT
		ALAS1
		FOXO1
		CFAP20
		MAGI2-AS3
		CBX2
		AL512506.1
		AC092828.1
		GBA2
		C4B
		DNAJB13
		AL365295.1
		ALDH1L1
		MAN1A1
		PRKN
		SIGLEC15
		CKMT1B
		LINC01393
		Z83851.1
		DCAF4
		TACC1
		ZDHHC3
		PRKD2
		AC019205.1
		KCNG3
		SKI
		FAM156A
		CALCR
		FP565260.6
		NUDT16L1
		KLHL31
		MIR5581
		BACH1-IT2
		FRG1KP
		TSPAN18
		LRRN4CL
		DAGLA
		KIZ
		TBC1D15
		DMD
		SRM
		AC063944.2
		KDM2B
		PDCL3P5
		MBOAT7
		ERICH1
		GSE1
		UCP3
		VAMP7
		BBIP1
		DENND6B
		GALNS
		AC134878.2
		AL645608.8
		AL132765.2
		RNASEH2B-AS1
		AP001284.1
		GPR75
		NCLN
		AC003991.1
		COLQ
		IGFL1
		FZR1
		AC048341.1
		ERBB4
		CCDC12
		MUSK
		AC006059.1
		AL513329.1
		AL132656.3
		SMAD3
		NEDD4
		ATP6V0B
		CMTM1
		ZC3H3
		TMC2
		AC068768.2
		NKRF
		DUSP2
		LINC01474
		SLC9C1
		AC027514.1
		HACE1
		SCD5
		AC020612.3
		DMPK
		AGAP1-IT1
		AC087289.5
		PRH1
		LTBP2
		MANSC4
		TLNRD1
		KCNJ9
		AC122688.3
		AC136475.3
		SULT1A1
		AC234781.5
		AC027228.2
		TTC5
		TDH
		PRR5-ARHGAP8
		AC068594.1
		AC087620.1
		NFKBID
		AP002884.1
		MRPL35
		RPSAP14
		AC084782.2
		MCAM
		AC008883.1
		RDH16
		ZBTB11-AS1
		ECEL1P3
		GRAMD4
		KAT2A
		SLITRK6
		MIEF1
		FBXL19
		CAMK2G
		MVB12B
		DNAH2
		FAAP20
		KCTD20
		AC010422.6
		MST1R
		GLIS1
		AC067930.6
		EPPK1
		RHPN1
		TMEM150C
		AL355802.1
		LINC00624
		SAP130
		RN7SKP23
		CAPZA1
		CDYL2
		AC021106.2
		B3GALNT1
		FAM136A
		AL157791.1
		LY75
		ZBTB1
		ZNF876P
		AC004477.3
		CYCSP10
		PUS7
		AL133406.2
		LINC01137
		PCDHB10
		DIAPH1
		IQSEC1
		COQ8A
		AC083964.1
		MRPL49
		CASZ1
		LGALS9C
		MIR600HG
		NPIPB13
		TMEM201
		C7orf43
		DISP2
		C1orf226
		MIR5008
		CBLN3
		MPP3
		ARHGEF6
		ACMSD
		ZNF607
		ZNF575
		AC145423.3
		RNU6-850P
		AL121906.1
		AC010680.5
		RPL23AP67
		AC013268.3
		AC007552.2
		PPP1R14C
		KCTD12
		AL353763.1
		TNFSF9
		ALS2CR12
		C8orf37-AS1
		PAM16
		SDCBP2
		AC008079.2
		AC023043.2
		RND1
		PHTF2
		CELF4
		PRKCQ-AS1
		MIR4458HG
		AC135178.5
		ARHGAP22
		AL158163.1
		AL133373.2
		SLC25A43
		AC032044.2
		UBE2J2
		AC090589.2
		AP000808.1
		ITGB5-AS1
		CUBN
		TMEM139
		PPP1R13B
		RNU6-10P
		AC115618.1
		AC104758.2
		RNU6-516P
		BACH1-IT1
		ASPRV1
		PALLD
		AL162311.3
		AC008494.1
		BCLAF1
		AC245041.1
		MIR3176
		AC067817.2
		BRWD1-AS1
		AC091057.3
		ZNF331
		AC087294.1
		GMFG
		SUV39H2
		AL031985.3
		UQCRBP3
		CST3
		SLC35A5
		GLA
		SMG1P2
		SRD5A2
		SMPD2
		CSRP3
		ALPP
		RALGPS1
		MFSD4A
		ZNF107
		CMYA5
		C1orf198
		EDAR
		CREBBP
		AC109454.2
		SH3BGRL2
		MCM8-AS1
		TRABD2B
		LINC02331
		REXO1
		SYT7
		ZNF790
		THEM4
		SLC19A1
		LIMS1
		DCUN1D2
		FOXE3
		AL358115.1
		NF1P12
		HS6ST1P1
		AC027237.3
		TEPSIN
		AC074050.4
		BNC1
		PCDHB6
		AC097634.1
		SLA2
		SLC25A40
		FOXD2
		AC008736.2
		MDGA1
		DUTP2
		AC245100.7
		AL136531.2
		UBASH3B
		SEC16A
		ANGPTL4
		AC021242.3
		SBF1
		AC114341.1
		HOXB4
		CASC15
		KDF1
		IKBKB
		MYEOV
		AL022328.2
		ZNF142
		PEG13
		RNU6-80P
		MARK2
		AC092368.3
		HRASLS2
		LIPG
		AL021407.1
		MAPK8
		KCNJ12
		ZFYVE28
		NID2
		AL591866.1
		MRPS16
		KBTBD4
		RNU6-1016P
		AC107959.2
		MIR25
		AC073127.1
		PLIN5
		HKR1
		GJC2
		RPL23AP17
		TAS2R8
		TM4SF1
		SMG7
		AC010531.3
		NPIPA2
		CTNND1
		AC114495.2
		AC132192.2
		KNOP1P2
		IMPDH1
		ZNF620
		POM121B
		GABBR2
		AC008760.2
		KCNIP2
		CFAP44-AS1
		AC133550.2
		PAGR1
		POLD3
		BEND3
		AL034417.1
		POU2F1
		CNNM2
		PSCA
		TTLL5
		SPINK8
		FAM71D
		SPTSSB
		KDSR
		FAM222A
		HNRNPA1
		ZC3H12B
		LINC00526
		AMER1
		SPHK2
		CYYR1-AS1
		BICDL2
		RBP5
		E2F8
		OTUD1
		AC106037.2
		JPT1
		TC2N
		MATR3
		RBFOX3
		PROZ
		HNRNPA1P16
		AP000238.1
		DANT2
		SAMD12
		AP002761.4
		CALML4
		AC007382.1
		ST3GAL1
		TEKT4P2
		CNN2P9
		AC012074.1
		SRPRA
		UBQLN4
		PAK6
		TAS1R3
		AC022306.3
		CLPTM1
		SVILP1
		ALG1L
		AGPAT3
		AC016526.2
		AC017067.1
		E2F1
		AL031710.2
		RRP9
		LINC00857
		TMEM171
		AASDHPPT
		FAM110A
		THTPA
		CSK
		FURIN
		RHBDD2
		RAB33A
		ALDH1B1
		LRRN4
		AP5M1
		C1orf159
		CSNK1D
		FAM118A
		AL133215.2
		JCAD
		TWNK
		KCNK12
		FOXD2-AS1
		CCNC
		CHKA
		ANKRD9
		AC114489.1
		SPATS2
		ZNF813
		NOS2P3
		TAF6L
		AC018638.2
		WARS2-IT1
		SAP30L-AS1
		AC022400.2
		JAG2
		SLCO4A1
		TBC1D4
		CCDC84
		AC008243.1
		AC005546.1
		AC027279.1
		AC104129.1
		GPR37
		RN7SL81P
		AC116407.4
		P2RY6
		NLRC5
		AL596223.1
		FGF7
		RNU6ATAC24P
		SLC47A1P1
		RAB3B
		AC002075.1
		TNFSF13B
		AL096865.1
		SLC16A3
		RANBP17
		AL359715.3
		SNX3
		ASB18
		NECAB3
		MGAT4A
		TSC22D4
		AL031708.1
		VN1R1
		SRSF2
		CCDC88C
		AC092683.1
		AC025154.2
		SRGAP3
		C8orf76
		RN7SL397P
		AC064801.2
		TYRO3P
		AC005722.1
		RPL7AP2
		GMNN
		TIMM21
		CEP152
		AL031775.2
		PRDM15
		GSK3A
		ADAM20
		AC132008.2
		KCNK5
		DNER
		TTC9
		AC025627.1
		ZBTB49
		AL445685.1
		AC079336.5
		FAM160A1
		CCDC115
		AC104446.1
		TUBB1
		AC011465.1
		AC011933.3
		TOP1
		AL157937.1
		Z94721.1
		RNU6-322P
		CHORDC1
		NUTM2B
		MMS22L
		AC040975.1
		LY6K
		UFSP1
		CYP2D6
		GRPEL1
		CAPN10-AS1
		C1orf61
		C16orf45
		DNAH17
		NCOR2
		TONSL
		TNXB
		TACR1
		SNX25
		MTND5P26
		AC120057.4
		HEPHL1
		PCSK6
		LINC01494
		TUBA3E
		MYO16-AS1
		AC024267.3
		PTPRH
		AL049870.3
		AC015961.2
		MILR1
		CYCSP34
		SCAMP3
		AC009090.4
		LINC00313
		AP003392.1
		AL390067.1
		FBXO46
		ATP2B2
		HPS1
		LYPD8
		SH2B1
		AADACP1
		AC055876.2
		AL050343.1
		KCNV2
		AC100803.2
		GCH1
		PODXL
		AC005162.3
		LIPT1
		SLC37A1
		LIN7B
		E2F7
		VPS37B
		ADAMTS17
		WNT16
		TRPV1
		MAGEA10
		SLCO1C1
		QSOX2
		SLC39A4
		SMIM15-AS1
		KMT2D
		OGN
		PPP5C
		SCAMP4
		RN7SL192P
		HIC1
		DCAF13P3
		EEF1D
		AC027288.3
		AC023906.5
		MELTF
		LRRTM2
		ATP6V0C
		RPRD1A
		EIF4ENIF1
		AC004980.2
		HPDL
		AC016027.3
		AP000941.1
		RNU6-481P
		DOCK9-AS2
		CD247
		AP002364.1
		RSL24D1P6
		AC022596.2
		OR7E157P
		SLC35C1
		SHPK
		BEND3P3
		NBL1
		LINC00184
		ZNF252P-AS1
		PTOV1-AS2
		AC024940.1
		FAXDC2
		PRRT3-AS1
		PGM5
		HDAC10
		RNMT
		ZDHHC20-IT1
		PIGU
		CNNM3
		GRAMD2B
		ALMS1
		AMPD2
		GATA2-AS1
		AL022323.4
		AC004466.3
		AC091132.4
		AL590627.1
		MYBBP1A
		PASK
		AC121761.1
		COL12A1
		AC073611.1
		ISCA2
		HMGB1
		AL161431.1
		RPL7P28
		SOX7
		IQCK
		SLC25A39P1
		PTPRE
		ALKBH3-AS1
		JAM3
		PSG8
		AC090922.1
		FAM13A-AS1
		SP6
		ATP11A
		MIR5194
		LINC02019
		ZNF692
		AP000648.3
		Z83851.2
		TRAF3
		RPL23AP88
		COX17
		TCF12
		PRKCD
		NDUFB4
		ANTXR2
		RBM19
		PPTC7
		AL079301.1
		AC068228.1
		PROSER1
		TBC1D2B
		PLEKHG3
		FRMD6
		DGKZ
		FKBP10
		PCDHGC4
		SDCBP2-AS1
		MAN1C1
		AC013476.1
		FAM83E
		CA5BP1
		MATN3
		TBC1D20
		AL109613.1
		GARNL3
		PPP1R16A
		MYO18A
		AL359715.1
		USP45
		TNS1
		AL442663.3
		AC020634.1
		PBOV1
		RNU6V
		PFN1P8
		ARHGAP23
		ADCY10
		KLHL32
		FOXP4
		CD37
		SH3BP5L
		PHBP19
		TBC1D30
		CYP3A7
		HTT
		AL445931.1
		HOXC9
		LINC00582
		RNU2-51P
		AC073476.1
		TDG
		OGFOD3
		DCTPP1
		CAMK2A
		SNORA66
		AP001527.2
		RNU6-817P
		PPM1L
		AKR1C8P
		AC006504.8
		SOX2-OT
		C2CD2
		NKX1-2
		AL121906.2
		TLR4
		DNASE1L2
		DOCK5
		DSEL
		C19orf24
		AC015909.5
		SHROOM2
		AL024508.1
		AL021707.2
		PLB1
		AL355877.2
		TMEM132B
		AL662791.1
		CCDC89
		AC021106.3
		URAHP
		MAMDC2
		ZNF341
		PPP1R26-AS1
		SCG5
		ATP6V1B1
		MIR548AC
		DAAM1
		MROH1
		RNF44
		AC012676.1
		STEAP3-AS1
		PTGIS
		AC090772.1
		AC078883.4
		PKP4-AS1
		AC010536.2
		PMPCA
		ZNF785
		SSC4D
		GJD3
		AC004263.1
		TNRC18P1
		SLC4A8
		AC080037.1
		ZNF718
		CXADR
		AL132656.2
		EPHX3
		ALDH3A2
		BOP1
		AC108206.1
		P2RX5-TAX1BP3
		AC022898.2
		AL157791.2
		TMEM92
		AC016396.1
		ACOT7
		AC007040.2
		H3F3B
		MT-TP
		ARIH1
		TP73-AS1
		LINC01508
		AL512622.1
		CPAMD8
		ZNF275
		SULT1A2
		SOWAHB
		TIAF1
		FANCA
		ASAP1
		AC011411.1
		BRCC3
		AP4M1
		AC007552.1
		AC009303.2
		AC080013.3
		BAG3
		AC019117.1
		MVD
		GCNT2
		AC015802.4
		RITA1
		DRP2
		AC099677.4
		SLC9A3R2
		AL358232.1
		SMG1
		AC092338.1
		PIP5K1C
		LINC01978
		TSPAN14
		AC159540.2
		SLC2A1
		NDUFAF4P2
		CD14
		SOGA1
		AL035634.1
		AC092681.1
		SPIN2A
		AC009996.1
		CRABP2
		CCDC125
		ISLR
		NARF
		NRL
		CYP4F2
		ACSBG1
		AC010735.2
		AL627309.2
		AP005136.1
		RPL12P20
		AC004067.1
		EVI2B
		CTPS1
		PLEKHG4B
		SULT1A3
		SAA1
		AC011352.3
		RC3H2
		PQLC1
		AL022097.1
		LINC01447
		GLI2
		MAP1LC3A
		PPP6C
		PLEKHD1
		FNTA
		ACACB
		RABGAP1L
		NMU
		SEMA4A
		TIMM23B
		ARHGDIG
		KPTN
		ZNF503-AS2
		DFFBP1
		RNU6-1262P
		AC105036.3
		RPL23AP24
		TRIM16L
		ADM5
		AC009802.1
		SCAF4
		AL390879.1
		AC116407.2
		ARTN
		AC073130.3
		TMTC2
		AC124016.2
		TEX264
		RTL8A
		DHCR24
		AL390198.1
		MPZL2
		TMEM204
		AL031281.2
		AL355852.1
		CDH13
		AL358075.1
		FASN
		AC096536.3
		EDDM13
		RNU6-1316P
		CEP170B
		AC087388.1
		SRRM1P3
		SPOPL
		PACRGL
		C9orf66
		AC131212.2
		DHX30
		PLCH2
		PSPN
		PPP2R1B
		TANC1
		NCOA7-AS1
		C15orf62
		ZNF527
		AGAP9
		TAMM41
		AC026495.1
		UNC93B7
		AL022345.1
		LINC02038
		RPL26P27
		IDSP1
		AC011676.5
		BZW1
		SOS1-IT1
		CCDC86
		AC010595.1
		TPRXL
		AC010754.1
		CTRB2
		AC009948.5
		TUBA3D
		RGCC
		SH3GLB2
		AL136038.5
		ANO7
		AL031118.1
		AC010894.3
		TMEM184B
		AC140134.1
		AGAP2
		DOT1L
		COL13A1
		ERVW-1
		AC011442.1
		TRPM4
		AC011825.2
		B3GAT2
		AC104938.1
		TMEM86B
		ARSI
		ZDHHC18
		AC007038.2
		CPSF1
		RAI1
		STARD10
		BCL2L2-PABPN1
		ADORA1
		AL445645.1
		EEF1E1
		AC005972.1
		PARP10
		AC016745.1
		AC073046.1
		WBP2
		ENPP7P1
		TMEM144
		AC012676.5
		SLC46A1
		COX7A1
		AL590235.1
		KCNC4
		TMEM220
		CPTP
		AL359715.2
		DNAJB12
		CHERP
		MYO1G
		AC018714.1
		AC018690.1
		AP000254.1
		EDN2
		AC099343.2
		TCEAL3-AS1
		RUSC1-AS1
		AC008537.3
		Z95114.3
		ANKRD1
		DDR1
		ATP6V1D
		PTGS1
		AL161452.1
		LRP2BP
		MEIOC
		RBFA
		C18orf54
		AL034346.1
		DENND2D
		AC012615.6
		FXYD3
		AL160006.1
		FBXO10
		WDR66
		SLC25A5-AS1
		DLG3-AS1
		GCSH
		AL122035.2
		AC022762.2
		SOD2
		CYTH1
		NOSTRIN
		AC087482.1
		HERC2P2
		FIBCD1
		CMPK2
		AC078909.2
		LRGUK
		PRDM2
		RRN3P2
		SHROOM1
		BECN2
		C2CD3
		MMP15
		NCDN
		AL136418.1
		TMEM104
		LRRC8A
		ZBED1
		ANKRD49
		AC018553.1
		EML3
		AP000344.2
		COMMD5
		HDHD2
		IGDCC3
		AC022400.5
		FAM221B
		CR392039.1
		CAMSAP1
		IGLJCOR18
		AC132219.2
		AHRR
		ZDHHC11B
		ZNF324
		ENTPD7
		AC113382.1
		FARSA-AS1
		AL606834.2
		TGFB2-AS1
		PFN1P2
		UCN2
		DPYSL4
		BICD1
		TPTE2
		RAB11FIP4
		IQANK1
		HOXA5
		RN7SL181P
		FPGT-TNNI3K
		RTL8C
		AP001029.3
		ZNF750
		FAM122B
		MAP3K6
		PPP6R2
		AL133481.1
		AC073264.3
		UNKL
		RAVER1
		PLA2G10
		TMEM134
		ALDH5A1
		FBRS
		SPATA24
		AC026367.2
		TBC1D24
		PTPN23
		DGCR8
		BRI3BP
		PLBD2
		SLC12A7
		FBXO34
		PCDH12
		F2RL2
		TELO2
		PNPLA3
		PCDHB14
		CSNK1E
		AL136038.4
		ARL17B
		PAX6
		AC015799.1
		AC002553.1
		AC087742.1
		LRP8
		AC012313.1
		SCARA3
		PPP1R36
		HCFC2
		PRDM10
		SRGAP1
		RNU2-7P
		C15orf39
		AC009041.4
		TARDBP
		LRP1-AS
		AC080112.3
		PLXNB2
		NSFL1C
		HEY1
		CANT1
		CROCCP2
		SLC7A7
		TMEM64
		DNAH8
		PCDHGA11
		AC137936.2
		TOMM5
		SLC41A1
		AL021154.1
		AC012447.1
		AC026401.3
		AC010973.2
		TNRC6C-AS1
		TCF20
		FAM178B
		CNIH1
		GPR63
		MROH6
		UST
		RAI1-AS1
		Z98257.1
		SNORA71C
		FUT2
		AATBC
		IRF9
		AL358852.1
		MYO1D
		AC008735.2
		GAPDHP16
		DIO3OS
		SMAD6
		AL121890.5
		HNRNPUL2-BSCL2
		MEF2C
		ACTR3
		AC007610.2
		ZNF485
		RN7SL650P
		HOXC13
		SPATA5L1
		NDST1
		AC114402.2
		BCO2
		ACACA
		ABCG1
		MAGEE1
		CTIF
		ZNF154
		SLC35B2
		AL080317.2
		CTSW
		AC073575.1
		AC091133.5
		SLC25A44
		LRRC4
		CS
		ECE2
		OVGP1
		FADS2
		SCOCP1
		THBD
		AC010326.3
		AC007292.1
		ZC3H12A
		PLEKHA3
		AP000345.2
		AC104115.2
		SCD
		ROR1-AS1
		NT5DC3
		N6AMT1
		AL359711.2
		HSPA1A
		DAPK2
		AC091132.5
		U2AF1
		FUT8-AS1
		AL445187.1
		CREBZF
		AC109460.2
		SKA1
		AC007956.1
		AC068282.1
		ZCCHC14
		AL157700.1
		TVP23CP1
		HOXC13-AS
		AC092338.2
		DUSP8P5
		NCS1
		FAM172BP
		NFIX
		USP21
		AC013451.2
		GPR34
		AC090948.1
		MIR429
		SLC20A1
		AC116914.2
		AC090409.1
		SOCS5P4
		B3GALNT1P1
		LYNX1
		TMEM92-AS1
		AC021945.1
		SLC29A2
		NHSL1
		AC009078.3
		AC005014.2
		AC004832.4
		AL031846.2
		AC009303.1
		SLC25A28
		AL049780.3
		ZBTB44
		SUMO4
		ACTBP1
		RGPD1
		PRSS36
		CFP
		TBCD
		AC073413.1
		PANK4
		RECQL4
		DPAGT1
		AL353807.1
		ZFP57
		RSPH9
		FJX1
		CLCF1
		AL391280.1
		SLC27A5
		MTND4P9
		CHKB-CPT1B
		AL138820.1
		GAPDHS
		CYP26A1
		GNAL
		TPRG1L
		IMP4
		CERK
		IKBKGP1
		MRPL38
		LRRN2
		POLR3K
		HSD11B2
		AC011466.3
		RPS12P20
		TMEM250
		SCUBE3
		ZNF345
		TMEM63C
		FGF17
		RIN2
		MFSD11
		OTUD3
		RWDD4
		AC102945.1
		RGL1
		PALM2
		AC017074.1
		INPP5J
		CBFA2T2
		AP000919.1
		AC078883.3
		AP001885.1
		SPDYE5
		BMS1P2
		PLA2G6
		MRPS28
		SYTL4
		BMP8A
		AC006058.3
		MFSD13B
		AC022400.1
		C5orf46
		UCA1
		AC025678.3
		HIF1A-AS2
		AC007000.3
		DHCR7
		CFLAR-AS1
		PPP1R14D
		KRT18P7
		AP001094.3
		FRMD4A
		WWOX
		EBAG9P1
		AC020978.9
		FBXO25
		AC093458.2
		DTX4
		AC094019.1
		LRFN4
		AC211476.2
		LDLRAP1
		STIM2
		HS1BP3-IT1
		ANKRD36C
		ANKRD26P4
		AL022326.1
		UBXN11
		C19orf73
		SHB
		ZNF573
		SLC43A2
		ZNF616
		AL110118.2
		AC079414.3
		SETD1B
		SNRNP35
		NRIP2
		RIC8B
		AL031666.3
		KIAA1024
		LOX
		RAD21-AS1
		PALD1
		FAM53B
		USP36
		PRKCH
		VN1R108P
		WDR90
		AC112236.2
		AC004975.1
		RBP3
		NHLH1
		TIMM17B
		AP000487.1
		SREBF1
		AC004160.1
		MIR3192
		AC005077.4
		FBXO28
		BACH2
		RNF123
		ZUFSP
		MUM1
		SYT16
		AC103706.1
		AL079307.1
		AC007216.3
		TRMT61A
		AC107398.3
		AL662907.2
		C1QTNF1
		TRADD
		AL357153.2
		IL20RB-AS1
		SCN3B
		RNY1P9
		DIO3
		MIR3677
		BTLA
		RDH13
		AC004466.1
		KLHDC4
		AC084033.1
		AFAP1-AS1
		DUSP7
		AC108002.1
		DLSTP1
		AC008764.2
		AC084125.2
		TAF7L
		BDNF
		CYP2F2P
		EFHD1
		AC018665.1
		AC011815.3
		AC005632.3
		RAB26
		AC090058.1
		C1orf21
		TMEM165
		AC016745.2
		PBRM1
		SLC25A25-AS1
		SERINC2
		SNAPC4
		KRT87P
		HS6ST2
		HSF4
		SPEN
		AL353804.1
		FRAT2
		TULP4
		PAPPA2
		ARAP3
		LINC01123
		AC092718.1
		DHRS3
		AC092437.1
		IL12A
		RAET1E-AS1
		SSNA1
		LRRC37A15P
		AP000692.1
		MX2
		AC008481.2
		HSP90AA1
		PHLPP1
		AC026367.3
		PHACTR4
		BRD9
		AC087163.2
		AC002076.1
		NBEAL2
		NPHP4
		AL356801.1
		ANKRD39
		AC073320.1
		AC127496.7
		FBXW5
		AC091544.5
		GRIN1
		ZNF302
		LIMCH1
		HOOK2
		GLUL
		PRKD1
		RAPGEF3
		DDX3P1
		TGOLN2
		BCAS1
		SORD
		SLC25A33
		TRRAP
		SERHL2
		NPR2
		AC012213.3
		CICP14
		CFAP161
		ARHGEF1
		YLPM1
		IL16
		TCF3
		AL121790.1
		AC090833.1
		AC120049.1
		AC069544.1
		AC124319.2
		WNT5A-AS1
		LINC01290
		HSPA1B
		CCDC146
		ZNF488
		AC112220.2
		TMEM145
		SF3B4
		SEMA5A
		Z94721.2
		IGFBP4
		PRKXP1
		AL136980.1
		AC137932.2
		MTND5P42
		SLC4A11
		PGM3
		IL10RB-AS1
		AL136084.2
		ADGRA3
		ZNF33A
		SLC52A2
		AMD1
		AC010203.2
		Z82217.1
		AL591848.3
		LMBR1
		AP000697.1
		GFOD2
		AL136038.3
		COPS7A
		AC084346.1
		RRP7A
		SLC25A14
		RELT
		AC138951.2
		KIAA1211L
		SHBG
		TOR3A
		PREP
		AL355987.5
		CSNK1A1P1
		SERPINE3
		FOXD4L1
		AC022154.1
		AP002807.1
		CHST11
		RNF39
		GSTM4
		DOHH
		CENPX
		TSN
		TATDN2P2
		AC244093.5
		NMNAT2
		RBBP6
		GGN
		PCAT1
		DTNB
		CYP2T1P
		UPK3B
		KLHL21
		AC131212.3
		SHH
		ENO4
		MKLN1
		SLC29A3
		MCM10
		ELF4
		SCNN1B
		AC120114.2
		AC005014.3
		KMT2B
		NPNT
		NUTM2B-AS1
		SGO1
		CHPF2
		AL121832.3
		PCSK9
		RN7SKP16
		SNORD62B
		PDXP
		APOM
		ZNF611
		EFR3B
		PPARD
		AC027514.2
		AC087500.1
		ASH1L-AS1
		DRC3
		AC005962.1
		AL160394.1
		SLC44A3
		KIAA0513
		AC087276.1
		SPRY1
		HOXC4
		C14orf37
		PDP2
		HERC2P3
		AC020978.4
		AL590666.1
		HS6ST1
		MIR3605
		AC112722.1
		AC103681.2
		MIR339
		AC010226.1
		WASH5P
		HERC2P9
		AC092535.1
		LINC00598
		U73169.1
		LINC01752
		STPG2
		AL442128.2
		L3HYPDH
		AC006518.1
		TMEM41A
		AL135999.1
		CASKIN2
		CICP8
		AC012354.3
		GATA2
		ZNF668
		TMEM50A
		TTC14
		PLEKHF1
		ZFYVE27
		SLC25A1P5
		SEMA3F
		FAM46C
		ST6GAL1
		HMGCS1
		HMGN1P15
		HOXA6
		SNORA16B
		ACTN1
		AC012513.2
		ROR1
		GJB4
		PTMAP1
		ITGAL
		CHST3
		MAP3K9
		AL590369.1
		LINC02078
		ACKR3
		HOPX
		FAM174B
		CDC25A
		TGFB2
		MDFIC
		AC004596.1
		RNU6-8
		AL596244.1
		UNC5B
		CHSY1
		AC025871.1
		DGKH
		TMEM30B
		ARFGEF3
		FAM83A-AS1
		AC002064.1
		NCF2
		PAX9
		BCL9
		PDXK
		IFFO2
		PRMT2
		AC091167.4
		TP53INP2
		BCL9L
		PITRM1-AS1
		AP001350.1
		AC139149.1
		AP005899.1
		AC013451.1
		AP001625.2
		SYNGR2
		SLC43A3
		AC069499.1
		RNU1-67P
		AC008735.1
		AC004706.1
		GLB1L2
		PDGFB
		RFX1
		ADAMTS14
		P2RY2
		CTBP1-AS
		RNU4ATAC18P
		AC007191.1
		DHX37
		CCDC160
		ASB16
		ARMC10
		MED16
		SRSF9P1
		AC009119.2
		KLHL25
		AC011491.2
		AC112497.1
		BRD1
		PSTPIP2
		L1CAM
		SRCIN1
		LINC01128
		PCDHA10
		INSIG2
		SNORA55
		RCCD1
		TTC31
		CACNB4
		CFL1P3
		AC036108.1
		CNIH2
		NOL12
		AC027575.2
		LYG2
		DHPS
		FFAR4
		MIR200A
		PPME1
		SDK1
		FUT9
		HELLPAR
		CAVIN4
		AZGP1
		AC234781.1
		DBF4B
		RAD54L
		PLAGL2
		TMEM109
		AC027288.1
		COL18A1-AS1
		SFTPB
		SEMA4G
		SLC47A2
		ST14
		AC099518.2
		WDR97
		MSRA
		LINC01505
		UBA52P6
		CYB5RL
		INSR
		SMG1P1
		CHD5
		AC011445.1
		QSER1
		PRR12
		AC116913.1
		AC120114.4
		MAK
		AC013444.1
		C10orf82
		CTHRC1
		SNORA22B
		RASGRF2
		AC087749.1
		KANTR
		ADD3-AS1
		ADAMTSL3
		SYTL3
		UGT1A3
		CYP3A4
		PISD
		CENPM
		MIGA2
		SLC51A
		PLCE1-AS2
		LINC01252
		S100A9
		RPS3P2
		CMTM8
		CLUH
		SYCP3
		AATK
		ZNF852
		AL031587.5
		AC127070.4
		AL136531.3
		HSPA1L
		AP000523.1
		NPC2
		PTK2
		LAMP3
		FAM98B
		HSP90AB2P
		AC092375.2
		TRIM29
		CDS1
		OTUD6B
		TMEM117
		AL157938.2
		C3orf52
		TMEM33
		ITFG2
		AC020937.1
		NR2C2
		TBX2-AS1
		KRT17
		AP002907.1
		AC103810.2
		ZFP41
		AC253576.2
		AC104066.1
		C12orf65
		LRRC42
		ZNF649
		UBALD1
		AL121672.2
		AC007938.1
		AC027020.1
		AGAP4
		PPP1R32
		TOX
		AC009690.2
		AL359094.1
		CLN6
		LRIG1
		TMC6
		TGFB1
		AC005722.2
		C1orf220
		RPL23AP64
		VN1R51P
		HYAL2
		IGFBP5
		MEGF6
		ZBTB24
		AC008592.5
		DUSP23
		AC008494.2
		C9orf116
		EIF4EBP1P1
		NR3C2
		PDZK1IP1
		TTC19
		RNU7-171P
		ZMYND19
		PM20D1
		TBC1D22A-AS1
		AC004000.1
		AC020659.1
		CORT
		DDX31
		GTF2A2
		RCHY1
		AC009032.1
		AC009120.2
		MIR1249
		ARHGEF28
		AGAP6
		SLC2A6
		CENPS-CORT
		AC005740.4
		AL513327.1
		ZNF880
		NOX5
		LINC00115
		PID1
		AL118516.1
		MTAP
		LOXL1-AS1
		AC008781.2
		SNRK
		AC008915.2
		BLZF2P
		KRTAP3-3
		PHLDA2
		KRT7
		AC018695.2
		CYSRT1
		COL4A1
		AL022328.1
		ENTPD1
		AC092718.2
		SETD1A
		RNA5SP219
		DUTP1
		PIAS4
		HSBP1L1
		ELMSAN1
		AL023806.3
		ECT2L
		UBFD1
		PTPRU
		ZNF418
		AC093525.7
		BAALC
		TLR2
		AC021491.4
		ESR2
		AC087683.2
		KAT7
		GATC
		AC016586.1
		CDK3
		VGLL4
		PLOD1
		RYR3
		FSCN2
		KIAA0141
		ADAM5
		AL157786.1
		RNF208
		PLK1
		AC005476.2
		MGAT5
		MYH9
		RAP1GAP
		AC023906.4
		AC131532.1
		TBX2
		AC073254.1
		AC007686.3
		ARGFXP2
		PTRH1
		AC026356.2
		ARF1
		AL008718.3
		NT5C
		DTX1
		CACNG4
		FOXO6
		CRY1
		CUZD1
		RPL12P44
		DDX42
		FBLN1
		AL513320.1
		LTB4R2
		AC015802.6
		RPEP4
		AL132639.3
		AC009237.14
		SARM1
		PRR25
		KLHL35
		RAB11FIP3
		CYB561D2
		SIPA1L3
		AC090241.3
		AC007014.1
		CICP27
		OBSCN
		CYYR1
		AJ239328.1
		SEMA6A-AS1
		AC092135.3
		FP236383.1
		AC022150.2
		AL139095.3
		ZG16B
		ZFP82
		DIS3L2
		ABHD17C
		LINC00106
		TBX15
		AL450306.1
		GTF2IP7
		FAM87B
		SEMA6A
		PDCD2
		TMEM14EP
		IDH3A
		RANBP3
		GYG1P3
		BAG6
		MMP28
		TRABD
		MKRN2OS
		LAYN
		AC110079.2
		AL049552.1
		AC092611.1
		BRIP1
		KCNAB2
		MCM9
		IQSEC3P1
		AC091390.1
		KHDRBS3
		PPIF
		CSAD
		AC105389.2
		ATPAF1
		ATP1B3-AS1
		AC107398.2
		AL390728.4
		FGFR1OP
		AC007066.2
		MFSD12
		RILP
		B4GALT3
		ALG3
		SNX18P3
		C19orf57
		TSACC
		AC021016.2
		RNU7-160P
		AC017104.3
		QSOX1
		PCDHB18P
		AL590666.2
		MIR6512
		LPCAT3
		TLL1
		AC116618.1
		ZNF845
		SEMA4C
		DGKZP1
		KRT18P15
#1DownPC9GR	7612	C9orf152
		PNMA1
		TRAF3IP2-AS1
		BX324167.2
		C10orf90
		ERCC5
		AL390208.1
		AP003559.1
		PDCL3
		AP002840.2
		AEN
		DECR1
		CADM4
		AC027601.5
		AL122010.1
		LMAN1
		DDB1
		MYO9B
		MMP7
		CRNKL1
		RF02246
		CENPQ
		ZBTB12
		DTNBP1
		ZAR1L
		AC036103.1
		KBTBD8
		ZEB1
		ZG16
		AL133215.3
		FAT4
		MIER1
		BANK1
		SPIN2B
		PIR
		AC112694.1
		SORL1
		CHD1
		SERPINF1
		WDR34
		CDC25B
		BMP3
		HIGD1B
		SLC25A46
		CD160
		CPNE4
		ALDOC
		PDCD4
		CEP350
		AC107032.2
		STK17A
		ABR
		FOXE1
		RF00569
		LINC01121
		AC008115.4
		CD38
[truncated: 15,690 more rows]

## Sheet: E_VD-Input_UpPC9DownMLN
gene_name	reg_type
HAUS2	up_pc9gr
BSN-AS2	up_pc9gr
AL360093.1	up_pc9gr
STK16	up_pc9gr
AGPAT1	up_pc9gr
AL451074.6	up_pc9gr
SUGCT	up_pc9gr
BX005019.1	up_pc9gr
MAP1LC3C	up_pc9gr
NUDT9P1	up_pc9gr
BBS12	up_pc9gr
HMGB3P31	up_pc9gr
HIST1H1PS1	up_pc9gr
GRK5	up_pc9gr
VWA5A	up_pc9gr
AC004890.3	up_pc9gr
RNF4	up_pc9gr
FPGT	up_pc9gr
AC116424.1	up_pc9gr
AC023790.2	up_pc9gr
MMP16	up_pc9gr
AC092964.1	up_pc9gr
AL359073.1	up_pc9gr
EMILIN1	up_pc9gr
TAF12	up_pc9gr
AP002990.1	up_pc9gr
AC007952.2	up_pc9gr
AC079866.2	up_pc9gr
GRXCR2	up_pc9gr
HLA-J	up_pc9gr
CYP1A1	up_pc9gr
LINC01270	up_pc9gr
UNC13B	up_pc9gr
CETN4P	up_pc9gr
AC027307.2	up_pc9gr
SLC9A3	up_pc9gr
FAM218A	up_pc9gr
LILRA6	up_pc9gr
CR381653.1	up_pc9gr
AC093915.1	up_pc9gr
GATA1	up_pc9gr
KLF4	up_pc9gr
MIR5010	up_pc9gr
LMO4	up_pc9gr
KRCC1	up_pc9gr
TFEC	up_pc9gr
LCN15	up_pc9gr
IL23A	up_pc9gr
FST	up_pc9gr
VWCE	up_pc9gr
SCRN1	up_pc9gr
NUGGC	up_pc9gr
METTL7B	up_pc9gr
AC114812.4	up_pc9gr
UPK1B	up_pc9gr
SVOPL	up_pc9gr
AP001830.1	up_pc9gr
AC148477.3	up_pc9gr
CASP1	up_pc9gr
PRRT1	up_pc9gr
RAC1P2	up_pc9gr
SECTM1	up_pc9gr
AL672207.1	up_pc9gr
TCTA	up_pc9gr
AC079075.1	up_pc9gr
B2M	up_pc9gr
C6orf141	up_pc9gr
C6orf52	up_pc9gr
TLR5	up_pc9gr
KLRG1	up_pc9gr
HPCAL4	up_pc9gr
SEMA3B-AS1	up_pc9gr
ALG13-AS1	up_pc9gr
LRRC37A16P	up_pc9gr
DICER1-AS1	up_pc9gr
AC132872.2	up_pc9gr
FOLR2	up_pc9gr
DDIT4L	up_pc9gr
RPL23AP97	up_pc9gr
LINC00622	up_pc9gr
AC138466.4	up_pc9gr
OR2A7	up_pc9gr
AC093503.1	up_pc9gr
KCTD2	up_pc9gr
MBL1P	up_pc9gr
AC106864.1	up_pc9gr
PIANP	up_pc9gr
AL365271.1	up_pc9gr
PIFO	up_pc9gr
CATSPER2P1	up_pc9gr
KLHDC1	up_pc9gr
IL9RP3	up_pc9gr
AC021739.5	up_pc9gr
SYNPO2L	up_pc9gr
ZNF775	up_pc9gr
ASB4	up_pc9gr
PPP1R15A	up_pc9gr
ALOX12	up_pc9gr
RPE	up_pc9gr
MRAS	up_pc9gr
AC079880.1	up_pc9gr
TUBB2B	up_pc9gr
AC018816.1	up_pc9gr
AL355574.1	up_pc9gr
RNF167	up_pc9gr
ZSCAN12P1	up_pc9gr
VN1R20P	up_pc9gr
TRBV29OR9-2	up_pc9gr
SCG2	up_pc9gr
AK8	up_pc9gr
SNX18	up_pc9gr
TIGD4	up_pc9gr
NAP1L5	up_pc9gr
TARS2	up_pc9gr
ENPEP	up_pc9gr
C1RL-AS1	up_pc9gr
AC009113.1	up_pc9gr
MAP3K12	up_pc9gr
PSMG3-AS1	up_pc9gr
AL033543.1	up_pc9gr
FBXO47	up_pc9gr
GRPR	up_pc9gr
AL353807.3	up_pc9gr
AL683813.1	up_pc9gr
MPIG6B	up_pc9gr
AC096540.1	up_pc9gr
GNG7	up_pc9gr
SPATA6L	up_pc9gr
AL132780.2	up_pc9gr
THRA	up_pc9gr
ENO3	up_pc9gr
ASIC4	up_pc9gr
DET1	up_pc9gr
SLC1A3	up_pc9gr
FNDC10	up_pc9gr
AC106869.1	up_pc9gr
CHP1	up_pc9gr
HNRNPA1P59	up_pc9gr
C2orf15	up_pc9gr
AC012358.1	up_pc9gr
FTCDNL1	up_pc9gr
C20orf194	up_pc9gr
AL591684.2	up_pc9gr
AP000924.1	up_pc9gr
C22orf39	up_pc9gr
ANKRD33B	up_pc9gr
PER1	up_pc9gr
AC005154.1	up_pc9gr
LMCD1	up_pc9gr
AC012512.1	up_pc9gr
AC005046.1	up_pc9gr
BCL6B	up_pc9gr
CD200R1	up_pc9gr
C22orf15	up_pc9gr
ADNP	up_pc9gr
RNY4P10	up_pc9gr
AL391069.2	up_pc9gr
ARHGAP24	up_pc9gr
AGBL2	up_pc9gr
AC009509.1	up_pc9gr
AL355312.1	up_pc9gr
LINC00663	up_pc9gr
WDR83	up_pc9gr
AC133552.5	up_pc9gr
THUMPD3-AS1	up_pc9gr
UGT8	up_pc9gr
AC145422.1	up_pc9gr
HINT1	up_pc9gr
AC109347.1	up_pc9gr
AC005229.4	up_pc9gr
RHOBTB1	up_pc9gr
HSD3BP5	up_pc9gr
AOX1	up_pc9gr
ABTB1	up_pc9gr
PHKB	up_pc9gr
RBAK	up_pc9gr
EHHADH	up_pc9gr
FKBP9P1	up_pc9gr
RNASE4	up_pc9gr
PARD6B	up_pc9gr
AC040160.2	up_pc9gr
MAST4-AS1	up_pc9gr
AC079684.1	up_pc9gr
KDM4A-AS1	up_pc9gr
UGCG	up_pc9gr
AL121895.1	up_pc9gr
PXT1	up_pc9gr
HCP5	up_pc9gr
UCN	up_pc9gr
AC110373.1	up_pc9gr
AC018645.2	up_pc9gr
SLC39A14	up_pc9gr
AL020996.1	up_pc9gr
AC106782.1	up_pc9gr
YBX2	up_pc9gr
AJ003147.2	up_pc9gr
LYPLA1	up_pc9gr
AL589986.2	up_pc9gr
EML1	up_pc9gr
LINC00482	up_pc9gr
CHMP5	up_pc9gr
ESRRAP2	up_pc9gr
AC010198.1	up_pc9gr
AL645608.1	up_pc9gr
RAP1GAP2	up_pc9gr
PON1	up_pc9gr
AC046143.1	up_pc9gr
RNU6-100P	up_pc9gr
AL512329.2	up_pc9gr
AL022323.5	up_pc9gr
HMCN1	up_pc9gr
CCDC186	up_pc9gr
AC005736.2	up_pc9gr
SIRT4	up_pc9gr
ARL4C	up_pc9gr
UBQLNL	up_pc9gr
AC114812.2	up_pc9gr
LPXN	up_pc9gr
ALDH1A2	up_pc9gr
EGR1	up_pc9gr
THSD1	up_pc9gr
AL354872.2	up_pc9gr
AC005632.2	up_pc9gr
AC004835.1	up_pc9gr
AC098934.2	up_pc9gr
KLF6	up_pc9gr
MROH3P	up_pc9gr
AC010186.3	up_pc9gr
HECW2	up_pc9gr
AL592114.3	up_pc9gr
AL354892.2	up_pc9gr
PPP1R42	up_pc9gr
RNF216P1	up_pc9gr
SMPD1	up_pc9gr
MOCS3	up_pc9gr
HSF2BP	up_pc9gr
AC046143.2	up_pc9gr
AL136309.2	up_pc9gr
RNU6-875P	up_pc9gr
PLA2G4A	up_pc9gr
MIR2116	up_pc9gr
HLA-DMB	up_pc9gr
AC008467.1	up_pc9gr
FAM229B	up_pc9gr
PPP2R5C	up_pc9gr
AL137145.1	up_pc9gr
AC008147.2	up_pc9gr
NDUFB5	up_pc9gr
AC022079.2	up_pc9gr
SLC26A4	up_pc9gr
PYCR1	up_pc9gr
AC121338.2	up_pc9gr
EREG	up_pc9gr
SUMF2	up_pc9gr
AC244033.1	up_pc9gr
PTX3	up_pc9gr
AC090971.3	up_pc9gr
ANG	up_pc9gr
RIOK3	up_pc9gr
NSUN5P1	up_pc9gr
ATP6V0E2-AS1	up_pc9gr
ABLIM2	up_pc9gr
AC016168.1	up_pc9gr
AC138207.6	up_pc9gr
GTF3C2	up_pc9gr
FFAR1	up_pc9gr
AC007663.1	up_pc9gr
TXNIP	up_pc9gr
SNAP23P1	up_pc9gr
SRSF8	up_pc9gr
GLMP	up_pc9gr
H1F0	up_pc9gr
AC083843.1	up_pc9gr
AC242426.2	up_pc9gr
LINC01312	up_pc9gr
AC009309.1	up_pc9gr
Z93930.3	up_pc9gr
THAP2	up_pc9gr
ITGAM	up_pc9gr
AL133297.1	up_pc9gr
DUSP19	up_pc9gr
AC110285.7	up_pc9gr
LRIF1	up_pc9gr
OSCAR	up_pc9gr
AC107294.2	up_pc9gr
AC007249.2	up_pc9gr
GPR179	up_pc9gr
AC106739.1	up_pc9gr
PLCG2	up_pc9gr
SDAD1P1	up_pc9gr
AL080250.1	up_pc9gr
DMKN	up_pc9gr
MSH5	up_pc9gr
BLACAT1	up_pc9gr
B3GNT4	up_pc9gr
AC008555.8	up_pc9gr
PSORS1C1	up_pc9gr
AL445231.1	up_pc9gr
SP1	up_pc9gr
C1GALT1C1L	up_pc9gr
AC010900.1	up_pc9gr
AC017100.1	up_pc9gr
SERPINB1	up_pc9gr
GDPD3	up_pc9gr
FOS	up_pc9gr
SRP14-AS1	up_pc9gr
TUBB6	up_pc9gr
AC073073.1	up_pc9gr
FGF2	up_pc9gr
PRODH	up_pc9gr
CORO1A	up_pc9gr
SLC4A1AP	up_pc9gr
AC015849.5	up_pc9gr
COPS8	up_pc9gr
AC020658.6	up_pc9gr
AC010531.5	up_pc9gr
ENTPD3-AS1	up_pc9gr
MYRFL	up_pc9gr
AC129492.5	up_pc9gr
AL591895.1	up_pc9gr
LOH12CR2	up_pc9gr
VWA7	up_pc9gr
ISG20	up_pc9gr
ANKRD29	up_pc9gr
LINC00926	up_pc9gr
ATP6V1E1P1	up_pc9gr
ARHGAP31-AS1	up_pc9gr
MRPL40	up_pc9gr
AC116407.1	up_pc9gr
ZNF34	up_pc9gr
AL049794.1	up_pc9gr
FAM86EP	up_pc9gr
XBP1P1	up_pc9gr
SCML1	up_pc9gr
RAB13	up_pc9gr
CDKN1C	up_pc9gr
ZFAND3	up_pc9gr
AL645608.3	up_pc9gr
PRSS16	up_pc9gr
AL158207.2	up_pc9gr
ADAMTS13	up_pc9gr
SPATA21	up_pc9gr
GBP3	up_pc9gr
AL354798.1	up_pc9gr
FGL1	up_pc9gr
TLE6	up_pc9gr
LINC01634	up_pc9gr
PARP4P2	up_pc9gr
UGP2	up_pc9gr
DNMBP-AS1	up_pc9gr
GPX3	up_pc9gr
CEP57L1P1	up_pc9gr
AC009121.2	up_pc9gr
AC016405.1	up_pc9gr
LINC01426	up_pc9gr
LINC01585	up_pc9gr
AC025524.2	up_pc9gr
TRIM59	up_pc9gr
AHNAK2	up_pc9gr
AC080162.1	up_pc9gr
RN7SL268P	up_pc9gr
C1orf116	up_pc9gr
MTMR3	up_pc9gr
AC073349.2	up_pc9gr
CUTA	up_pc9gr
AC016355.1	up_pc9gr
MTMR11	up_pc9gr
MIR553	up_pc9gr
SUMO2P17	up_pc9gr
ATP2B1	up_pc9gr
AL590729.1	up_pc9gr
IGF2BP1	up_pc9gr
RNU6-82P	up_pc9gr
CD44-AS1	up_pc9gr
FBLN5	up_pc9gr
BORCS8	up_pc9gr
APBA1	up_pc9gr
COX7A2L	up_pc9gr
BEAN1-AS1	up_pc9gr
AC021086.1	up_pc9gr
GDF15	up_pc9gr
AC008734.1	up_pc9gr
PON3	up_pc9gr
SEC1P	up_pc9gr
AES	up_pc9gr
BBC3	up_pc9gr
ZNF181	up_pc9gr
DAD1	up_pc9gr
AC026954.1	up_pc9gr
AC020763.1	up_pc9gr
BVES-AS1	up_pc9gr
CCDC106	up_pc9gr
USP32P2	up_pc9gr
WNT8B	up_pc9gr
LRRC8D	up_pc9gr
INE1	up_pc9gr
TMEM191C	up_pc9gr
ALDH2	up_pc9gr
AC068790.3	up_pc9gr
PIN1	up_pc9gr
RASA4DP	up_pc9gr
ZSCAN16	up_pc9gr
AL008729.1	up_pc9gr
AC022306.2	up_pc9gr
AC107884.1	up_pc9gr
FAHD2P1	up_pc9gr
GPR19	up_pc9gr
ZMAT5	up_pc9gr
PPIAP29	up_pc9gr
EPX	up_pc9gr
AC020604.1	up_pc9gr
AP003774.1	up_pc9gr
ZNF467	up_pc9gr
LGI4	up_pc9gr
AC012170.2	up_pc9gr
LINC01358	up_pc9gr
AC069257.2	up_pc9gr
AL162615.1	up_pc9gr
PJA2	up_pc9gr
AGTRAP	up_pc9gr
NANOGP7	up_pc9gr
TPMT	up_pc9gr
SLC5A4-AS1	up_pc9gr
ITFG2-AS1	up_pc9gr
AL024507.2	up_pc9gr
ZC3H6	up_pc9gr
LINC01786	up_pc9gr
STMN1P1	up_pc9gr
TMEM25	up_pc9gr
LAMB3	up_pc9gr
PPL	up_pc9gr
Z97985.1	up_pc9gr
CCDC113	up_pc9gr
CEBPD	up_pc9gr
AL731577.2	up_pc9gr
IL1A	up_pc9gr
GNRH1	up_pc9gr
AC005391.1	up_pc9gr
LINC01237	up_pc9gr
RABGEF1	up_pc9gr
MST1P2	up_pc9gr
ROPN1	up_pc9gr
AC099850.3	up_pc9gr
AC004771.5	up_pc9gr
MSANTD3	up_pc9gr
HS3ST6	up_pc9gr
ACBD7	up_pc9gr
EME2	up_pc9gr
TRAPPC5	up_pc9gr
ATP2B1-AS1	up_pc9gr
ZFP90	up_pc9gr
AP2B1	up_pc9gr
RNA5SP474	up_pc9gr
IGFN1	up_pc9gr
GPR1	up_pc9gr
AC010201.1	up_pc9gr
GTF2IP13	up_pc9gr
PDZD7	up_pc9gr
TRIM14	up_pc9gr
BLOC1S5	up_pc9gr
FIGN	up_pc9gr
AC135721.1	up_pc9gr
ZNRF3-AS1	up_pc9gr
TM4SF1-AS1	up_pc9gr
LINC00672	up_pc9gr
ZBTB4	up_pc9gr
NME4	up_pc9gr
IRF2BPL	up_pc9gr
GAPDHP58	up_pc9gr
CD68	up_pc9gr
ANO7L1	up_pc9gr
CYTH4	up_pc9gr
SLC25A42	up_pc9gr
AC105339.3	up_pc9gr
SLC1A6	up_pc9gr
GGACT	up_pc9gr
AC068533.3	up_pc9gr
MICD	up_pc9gr
RBM34	up_pc9gr
AP000553.1	up_pc9gr
SYNE3	up_pc9gr
RSG1	up_pc9gr
ZNF717	up_pc9gr
FYB1	up_pc9gr
USP46	up_pc9gr
TMEM236	up_pc9gr
AP001025.1	up_pc9gr
AC020661.1	up_pc9gr
NDUFV1	up_pc9gr
ATP1A1-AS1	up_pc9gr
C1QTNF6	up_pc9gr
AC093864.1	up_pc9gr
ARL6IP5	up_pc9gr
TNKS1BP1	up_pc9gr
HELB	up_pc9gr
AC044860.1	up_pc9gr
DNAJC27	up_pc9gr
MTFP1	up_pc9gr
EEF1AKMT3	up_pc9gr
MAPK13	up_pc9gr
AC006449.6	up_pc9gr
GATA3-AS1	up_pc9gr
AC013472.3	up_pc9gr
NSMCE1	up_pc9gr
OR1F2P	up_pc9gr
ADTRP	up_pc9gr
CRMP1	up_pc9gr
PDE4B	up_pc9gr
CLIP4	up_pc9gr
FABP6	up_pc9gr
CCDC180	up_pc9gr
LINC00339	up_pc9gr
LINC00888	up_pc9gr
PCYOX1L	up_pc9gr
ANKRD13A	up_pc9gr
TMEM229B	up_pc9gr
IL32	up_pc9gr
AL008723.1	up_pc9gr
CAT	up_pc9gr
AC024075.3	up_pc9gr
MADCAM1	up_pc9gr
AC022165.1	up_pc9gr
DCAKD	up_pc9gr
AL138762.1	up_pc9gr
CD22	up_pc9gr
PPIC	up_pc9gr
AC084033.3	up_pc9gr
PNPLA7	up_pc9gr
SHISA7	up_pc9gr
STX1B	up_pc9gr
UBALD2	up_pc9gr
ANKRD20A8P	up_pc9gr
WDR83OS	up_pc9gr
KCND2	up_pc9gr
MIR3653	up_pc9gr
AFTPH	up_pc9gr
SBF2-AS1	up_pc9gr
TSPAN4	up_pc9gr
AP000356.3	up_pc9gr
MORF4L1	up_pc9gr
ZNF350-AS1	up_pc9gr
AC010894.2	up_pc9gr
TUBA4B	up_pc9gr
AMOT	up_pc9gr
ETV1	up_pc9gr
ZFP42	up_pc9gr
ZKSCAN2	up_pc9gr
ERC1	up_pc9gr
BCRP8	up_pc9gr
SCARF1	up_pc9gr
MINCR	up_pc9gr
GAPDHP22	up_pc9gr
C17orf97	up_pc9gr
AC100800.1	up_pc9gr
MED20	up_pc9gr
NFE2	up_pc9gr
LINC00884	up_pc9gr
SLC6A4	up_pc9gr
IFT46	up_pc9gr
GK	up_pc9gr
HMGB2P1	up_pc9gr
AP002026.1	up_pc9gr
AL118558.4	up_pc9gr
AIDA	up_pc9gr
LYRM1	up_pc9gr
AC079322.1	up_pc9gr
AC009163.7	up_pc9gr
UBE2F	up_pc9gr
AC004264.2	up_pc9gr
ARMCX5	up_pc9gr
LINC00484	up_pc9gr
TEX19	up_pc9gr
AC104596.1	up_pc9gr
TRIR	up_pc9gr
TFCP2L1	up_pc9gr
AL136964.1	up_pc9gr
AC010654.1	up_pc9gr
POLM	up_pc9gr
AC127526.2	up_pc9gr
CENPH	up_pc9gr
ELF3	up_pc9gr
LCN12	up_pc9gr
TSEN15	up_pc9gr
AC107214.2	up_pc9gr
GCM2	up_pc9gr
ZNF547	up_pc9gr
GPATCH2L	up_pc9gr
KRAS	up_pc9gr
SIPA1L2	up_pc9gr
AC005740.3	up_pc9gr
MGAT5B	up_pc9gr
PIM1	up_pc9gr
NR3C1	up_pc9gr
MAP2K6	up_pc9gr
CDC37L1	up_pc9gr
WDR24	up_pc9gr
TTC25	up_pc9gr
CXorf58	up_pc9gr
TLL2	up_pc9gr
ACKR4	up_pc9gr
SGSM1	up_pc9gr
RHNO1	up_pc9gr
ACTG1P15	up_pc9gr
NAT6	up_pc9gr
VWA8-AS1	up_pc9gr
LCMT1-AS1	up_pc9gr
AC025166.1	up_pc9gr
RGL3	up_pc9gr
FGFR2	up_pc9gr
PDPR	up_pc9gr
LINC01759	up_pc9gr
AP1M1	up_pc9gr
KLHL7-AS1	up_pc9gr
PCDHB4	up_pc9gr
LINC02018	up_pc9gr
AL354809.1	up_pc9gr
AL021807.1	up_pc9gr
TTC39C	up_pc9gr
KXD1	up_pc9gr
AC019080.4	up_pc9gr
AL365181.4	up_pc9gr
MIDN	up_pc9gr
CTH	up_pc9gr
AC116050.1	up_pc9gr
AL157400.3	up_pc9gr
MRPL17	up_pc9gr
ANKRD24	up_pc9gr
TCEAL4	up_pc9gr
GRB14	up_pc9gr
AL354877.1	up_pc9gr
BHLHA15	up_pc9gr
SPIN1	up_pc9gr
BMPER	up_pc9gr
AC009171.2	up_pc9gr
RNU7-59P	up_pc9gr
EPHX2	up_pc9gr
MGARP	up_pc9gr
AL731533.2	up_pc9gr
HHAT	up_pc9gr
CERNA1	up_pc9gr
CCDC68	up_pc9gr
AC114271.1	up_pc9gr
LHX1	up_pc9gr
GRTP1-AS1	up_pc9gr
AC098820.1	up_pc9gr
CD34	up_pc9gr
AL358072.1	up_pc9gr
RPS27AP10	up_pc9gr
DPH5	up_pc9gr
FAM183A	up_pc9gr
AC012640.2	up_pc9gr
CCDC36	up_pc9gr
TAF6	up_pc9gr
LINC01852	up_pc9gr
HOXA11-AS	up_pc9gr
PDE2A	up_pc9gr
YPEL4	up_pc9gr
TBCC	up_pc9gr
LSM6	up_pc9gr
TVP23B	up_pc9gr
AL358075.2	up_pc9gr
RNU7-47P	up_pc9gr
HIST1H1T	up_pc9gr
TRIM21	up_pc9gr
CFI	up_pc9gr
AP001453.2	up_pc9gr
TAT	up_pc9gr
RNA5-8SN4	up_pc9gr
SNAP23	up_pc9gr
LENEP	up_pc9gr
RHOB	up_pc9gr
NEU4	up_pc9gr
AC138393.3	up_pc9gr
ELOVL6	up_pc9gr
PPIL2	up_pc9gr
TNFAIP8	up_pc9gr
CALCRL	up_pc9gr
ICAM1	up_pc9gr
ZNF674	up_pc9gr
AL354733.2	up_pc9gr
AC005618.1	up_pc9gr
TAS1R1	up_pc9gr
AL109811.3	up_pc9gr
C9orf131	up_pc9gr
STAP2	up_pc9gr
SDHAF4	up_pc9gr
TRAPPC12-AS1	up_pc9gr
NBPF11	up_pc9gr
TRIM32	up_pc9gr
ANPEP	up_pc9gr
WWC2-AS2	up_pc9gr
AC007036.1	up_pc9gr
RAD17	up_pc9gr
LINC02475	up_pc9gr
RAB30	up_pc9gr
AL355336.1	up_pc9gr
AC021491.2	up_pc9gr
BTBD19	up_pc9gr
AC007014.2	up_pc9gr
CFAP52	up_pc9gr
ENPP1	up_pc9gr
UPP1	up_pc9gr
SYT14	up_pc9gr
CSF2RA	up_pc9gr
KSR2	up_pc9gr
ATP2A1-AS1	up_pc9gr
DUSP15	up_pc9gr
STPG4	up_pc9gr
DUSP16	up_pc9gr
CD24P4	up_pc9gr
SUPT6H	up_pc9gr
LINC00886	up_pc9gr
DAP3P1	up_pc9gr
SMG7-AS1	up_pc9gr
GEM	up_pc9gr
ALKBH3	up_pc9gr
ZFYVE19	up_pc9gr
CES1P1	up_pc9gr
AC040934.1	up_pc9gr
GRIFIN	up_pc9gr
EXOC3-AS1	up_pc9gr
CISH	up_pc9gr
RASSF6	up_pc9gr
SNORD63	up_pc9gr
GLIPR1L1	up_pc9gr
AC073957.1	up_pc9gr
AC245884.3	up_pc9gr
GPR61	up_pc9gr
TMCC1-AS1	up_pc9gr
AL162595.1	up_pc9gr
TTC30A	up_pc9gr
DPY19L2P3	up_pc9gr
DNAJC19	up_pc9gr
CD44	up_pc9gr
FAM153A	up_pc9gr
BTG2	up_pc9gr
AL390719.1	up_pc9gr
SIRPB2	up_pc9gr
TRIB3	up_pc9gr
ZNF446	up_pc9gr
CCDC28B	up_pc9gr
KCNK3	up_pc9gr
AC006504.3	up_pc9gr
IGLV5-52	up_pc9gr
AC023157.1	up_pc9gr
C9orf43	up_pc9gr
CCDC34	up_pc9gr
SLC26A10	up_pc9gr
STX8	up_pc9gr
CNBD2	up_pc9gr
SNX16	up_pc9gr
PDCD5	up_pc9gr
FGGY	up_pc9gr
AC020931.1	up_pc9gr
AC008267.5	up_pc9gr
TNFRSF9	up_pc9gr
SMUG1	up_pc9gr
RPS29P17	up_pc9gr
FRS2	up_pc9gr
ST8SIA4	up_pc9gr
LINC01843	up_pc9gr
GAS2L1	up_pc9gr
AL359091.2	up_pc9gr
KLHL41	up_pc9gr
MYO15B	up_pc9gr
LIMD1	up_pc9gr
VIM-AS1	up_pc9gr
COG1	up_pc9gr
SLC9A9	up_pc9gr
CFAP221	up_pc9gr
F7	up_pc9gr
SLC13A4	up_pc9gr
PAQR8	up_pc9gr
AL049555.1	up_pc9gr
SNORD46	up_pc9gr
NFIL3	up_pc9gr
FAM234A	up_pc9gr
AC098487.1	up_pc9gr
AL590004.4	up_pc9gr
SLC3A1	up_pc9gr
AC147651.1	up_pc9gr
YIPF2	up_pc9gr
AHR	up_pc9gr
NFE2L2	up_pc9gr
AC069335.1	up_pc9gr
SKAP2	up_pc9gr
JADE1	up_pc9gr
TAGAP	up_pc9gr
DENND5B-AS1	up_pc9gr
MIR503HG	up_pc9gr
CCM2L	up_pc9gr
PRR36	up_pc9gr
HOXB8	up_pc9gr
P2RX6P	up_pc9gr
NECAB2	up_pc9gr
MIR554	up_pc9gr
ZNF419	up_pc9gr
AC022445.1	up_pc9gr
AL133227.1	up_pc9gr
KLF2	up_pc9gr
PGLYRP1	up_pc9gr
TNFRSF1A	up_pc9gr
AC025031.1	up_pc9gr
CD8A	up_pc9gr
AC012184.3	up_pc9gr
CA9	up_pc9gr
XKRX	up_pc9gr
AC093901.1	up_pc9gr
AL162377.1	up_pc9gr
AC124944.2	up_pc9gr
LINC01783	up_pc9gr
ZFHX2	up_pc9gr
NR2F2-AS1	up_pc9gr
AL355102.4	up_pc9gr
AC004951.2	up_pc9gr
AREG	up_pc9gr
COG8	up_pc9gr
ADIRF-AS1	up_pc9gr
AC068446.2	up_pc9gr
PHYH	up_pc9gr
ULBP1	up_pc9gr
ALPK1	up_pc9gr
SLC11A1	up_pc9gr
RALB	up_pc9gr
PCDHGA4	up_pc9gr
HOXC-AS3	up_pc9gr
AC098484.1	up_pc9gr
KRT86	up_pc9gr
FZD10-AS1	up_pc9gr
CFAP74	up_pc9gr
TRIM6	up_pc9gr
AC131009.1	up_pc9gr
PROC	up_pc9gr
DEPDC1	up_pc9gr
ALG1L6P	up_pc9gr
AC100757.1	up_pc9gr
AC118658.2	up_pc9gr
SPRY4-IT1	up_pc9gr
ZNF114	up_pc9gr
AC025031.4	up_pc9gr
CR381653.2	up_pc9gr
AL132857.2	up_pc9gr
GTSE1-AS1	up_pc9gr
UNC119B	up_pc9gr
ERCC4	up_pc9gr
SDSL	up_pc9gr
EXD1	up_pc9gr
FAM83B	up_pc9gr
MIR222	up_pc9gr
SP110	up_pc9gr
CALHM1	up_pc9gr
BIVM	up_pc9gr
THSD7A	up_pc9gr
ZMAT1	up_pc9gr
AC002116.2	up_pc9gr
ZSCAN21	up_pc9gr
AL356275.1	up_pc9gr
UGT1A7	up_pc9gr
AC084018.2	up_pc9gr
KIAA1257	up_pc9gr
PLEKHB2	up_pc9gr
RPL28	up_pc9gr
BIN2	up_pc9gr
APOLD1	up_pc9gr
C7orf61	up_pc9gr
AC073343.2	up_pc9gr
UNC13A	up_pc9gr
CFL1P1	up_pc9gr
MRPS31P5	up_pc9gr
GAL3ST4	up_pc9gr
HHLA3	up_pc9gr
BAHD1	up_pc9gr
FTH1P3	up_pc9gr
HCG9	up_pc9gr
GRK4	up_pc9gr
PRPH	up_pc9gr
AC006159.1	up_pc9gr
AC027243.1	up_pc9gr
AC009878.1	up_pc9gr
SNAPC2	up_pc9gr
ZNF559	up_pc9gr
AL021937.2	up_pc9gr
LURAP1L-AS1	up_pc9gr
NHS	up_pc9gr
FBXL16	up_pc9gr
AP000350.7	up_pc9gr
CDKN1A	up_pc9gr
LIPC	up_pc9gr
ZNF660	up_pc9gr
AL157838.1	up_pc9gr
AC009720.1	up_pc9gr
AC010643.1	up_pc9gr
AJUBA	up_pc9gr
SV2A	up_pc9gr
CIAPIN1	up_pc9gr
FRMPD1	up_pc9gr
HIGD2B	up_pc9gr
DNAJC19P5	up_pc9gr
NOVA1	up_pc9gr
COL26A1	up_pc9gr
RPL21P39	up_pc9gr
AC062017.1	up_pc9gr
FOSB	up_pc9gr
CPE	up_pc9gr
TRIM46	up_pc9gr
MKS1	up_pc9gr
MIR4534	up_pc9gr
TMEM269	up_pc9gr
RNF222	up_pc9gr
ABCA5	up_pc9gr
AC245884.8	up_pc9gr
AP002851.1	up_pc9gr
LENG8-AS1	up_pc9gr
EZH2P1	up_pc9gr
AC009229.4	up_pc9gr
ATP1B1P1	up_pc9gr
PSD3	up_pc9gr
OR2A4	up_pc9gr
RDM1	up_pc9gr
DPY19L1P2	up_pc9gr
OR10AD1	up_pc9gr
RCN3	up_pc9gr
AC245297.1	up_pc9gr
ZNF554	up_pc9gr
LZTR1	up_pc9gr
ENPP4	up_pc9gr
RNF170	up_pc9gr
IRF1	up_pc9gr
PTK2B	up_pc9gr
USP20	up_pc9gr
ZFP3	up_pc9gr
PTPN12	up_pc9gr
PNPLA4	up_pc9gr
MIR3929	up_pc9gr
MIR3682	up_pc9gr
DSTNP2	up_pc9gr
LINC01220	up_pc9gr
AC026979.3	up_pc9gr
RPL7L1	up_pc9gr
LINC01504	up_pc9gr
FAS	up_pc9gr
AC079880.2	up_pc9gr
ANAPC13	up_pc9gr
RNF145	up_pc9gr
LINC01136	up_pc9gr
PTPN20	up_pc9gr
RNU6-190P	up_pc9gr
NUPR1	up_pc9gr
GLB1L	up_pc9gr
AC007342.3	up_pc9gr
AC145285.3	up_pc9gr
CDC37L1-AS1	up_pc9gr
AC010531.6	up_pc9gr
RNA5SP78	up_pc9gr
ZFP36L2	up_pc9gr
LRRFIP1P1	up_pc9gr
AC079610.2	up_pc9gr
SCNN1D	up_pc9gr
ADAM1B	up_pc9gr
IFITM2	up_pc9gr
STUB1	up_pc9gr
AL353759.1	up_pc9gr
P2RX6	up_pc9gr
EGR2	up_pc9gr
TMEM8B	up_pc9gr
GAPDHP32	up_pc9gr
YDJC	up_pc9gr
AC004812.2	up_pc9gr
AC022613.2	up_pc9gr
PHC2	up_pc9gr
LRRIQ3	up_pc9gr
MYH11	up_pc9gr
ZNRD1ASP	up_pc9gr
CDC42EP2	up_pc9gr
TGFBR1	up_pc9gr
GBP2	up_pc9gr
ATP1B2	up_pc9gr
TIE1	up_pc9gr
HIST1H3G	up_pc9gr
RFX3-AS1	up_pc9gr
AXDND1	up_pc9gr
IQCD	up_pc9gr
SSUH2	up_pc9gr
CASP7	up_pc9gr
TMEM106A	up_pc9gr
ZNF630	up_pc9gr
AC055811.2	up_pc9gr
TMEM129	up_pc9gr
G0S2	up_pc9gr
MIR573	up_pc9gr
CELF3	up_pc9gr
AC137630.3	up_pc9gr
ALG1L13P	up_pc9gr
LASP1	up_pc9gr
PIPSL	up_pc9gr
JHDM1D-AS1	up_pc9gr
AL606534.1	up_pc9gr
SUGT1P1	up_pc9gr
ARIH2OS	up_pc9gr
BCAS4	up_pc9gr
NNT-AS1	up_pc9gr
SLC7A2	up_pc9gr
AL391832.3	up_pc9gr
NDUFB10	up_pc9gr
ABCG2	up_pc9gr
AL450384.2	up_pc9gr
AL133330.1	up_pc9gr
AL133338.2	up_pc9gr
AC016877.3	up_pc9gr
FITM1	up_pc9gr
SNORA22	up_pc9gr
AC100771.2	up_pc9gr
POC1B-AS1	up_pc9gr
FAM198B	up_pc9gr
MIR6819	up_pc9gr
HIST1H2BG	up_pc9gr
SEPSECS	up_pc9gr
CT62	up_pc9gr
ANKFN1	up_pc9gr
AL645608.9	up_pc9gr
CXorf57	up_pc9gr
S1PR1	up_pc9gr
CD79A	up_pc9gr
CCDC18-AS1	up_pc9gr
IL1R2	up_pc9gr
BUD13P1	up_pc9gr
NBPF10	up_pc9gr
KDM4C	up_pc9gr
ERBB3	up_pc9gr
AC010210.1	up_pc9gr
PLAG1	up_pc9gr
NAT16	up_pc9gr
AL355075.2	up_pc9gr
FADS3	up_pc9gr
ZNF841	up_pc9gr
TMEM198B	up_pc9gr
AP003031.2	up_pc9gr
AC025171.1	up_pc9gr
GADD45GIP1	up_pc9gr
NR5A2	up_pc9gr
MAGEA6	up_pc9gr
ZNF256	up_pc9gr
AC105749.1	up_pc9gr
LINC00449	up_pc9gr
EXD3	up_pc9gr
HNF4A	up_pc9gr
USH1G	up_pc9gr
LINC00957	up_pc9gr
XBP1	up_pc9gr
AKR7A2P1	up_pc9gr
BPHL	up_pc9gr
SUPT20H	up_pc9gr
ACBD4	up_pc9gr
BSCL2	up_pc9gr
ANKRD12	up_pc9gr
LIN37	up_pc9gr
SOCS2	up_pc9gr
C11orf24	up_pc9gr
AC009812.3	up_pc9gr
C2orf70	up_pc9gr
DNAJB5	up_pc9gr
HLA-DMA	up_pc9gr
AC007998.5	up_pc9gr
AC110609.1	up_pc9gr
KIF28P	up_pc9gr
TCF7L2	up_pc9gr
MMP25	up_pc9gr
CHST5	up_pc9gr
HIPK2	up_pc9gr
CDC34	up_pc9gr
AC040896.1	up_pc9gr
CASC1	up_pc9gr
PLEKHA4	up_pc9gr
AC010186.2	up_pc9gr
AC139495.1	up_pc9gr
AC009229.2	up_pc9gr
GPR156	up_pc9gr
EXOC3L1	up_pc9gr
BOLA1	up_pc9gr
CYP4F26P	up_pc9gr
AC104109.2	up_pc9gr
DCTN2	up_pc9gr
AL590762.2	up_pc9gr
Z97353.1	up_pc9gr
YTHDC1	up_pc9gr
AC008080.4	up_pc9gr
AGMAT	up_pc9gr
TNFSF14	up_pc9gr
CRISPLD2	up_pc9gr
RBM43	up_pc9gr
SESN2	up_pc9gr
PLXDC1	up_pc9gr
FGD6	up_pc9gr
C2orf16	up_pc9gr
CALML6	up_pc9gr
MTCYBP32	up_pc9gr
DAPK1	up_pc9gr
AC007405.1	up_pc9gr
GPAT3	up_pc9gr
C1orf146	up_pc9gr
GLS2	up_pc9gr
AC011816.2	up_pc9gr
TINCR	up_pc9gr
KCTD1	up_pc9gr
WDR63	up_pc9gr
SPEF2	up_pc9gr
AC010761.3	up_pc9gr
HIST1H2BF	up_pc9gr
AC133785.1	up_pc9gr
AC092747.2	up_pc9gr
AC099521.1	up_pc9gr
RPL18P10	up_pc9gr
AC009950.1	up_pc9gr
AC025031.5	up_pc9gr
OR2B6	up_pc9gr
C1RL	up_pc9gr
B9D1	up_pc9gr
C15orf48	up_pc9gr
IGF2BP3	up_pc9gr
RNU6-339P	up_pc9gr
ZNF131	up_pc9gr
TMCC3	up_pc9gr
SPECC1L	up_pc9gr
KLHL2P1	up_pc9gr
DDB2	up_pc9gr
SPTSSA	up_pc9gr
MTRNR2L4	up_pc9gr
AC040169.3	up_pc9gr
AL590705.1	up_pc9gr
BHMT	up_pc9gr
AC107294.1	up_pc9gr
MSH6	up_pc9gr
GOLGA6L10	up_pc9gr
AC098614.1	up_pc9gr
FRMD5	up_pc9gr
AC091173.1	up_pc9gr
KBTBD3	up_pc9gr
TICAM2	up_pc9gr
ORAI3	up_pc9gr
RNU2-22P	up_pc9gr
CDH15	up_pc9gr
U62317.2	up_pc9gr
WDR19	up_pc9gr
CPEB1	up_pc9gr
RASSF5	up_pc9gr
HES7	up_pc9gr
RPL32	up_pc9gr
BBS1	up_pc9gr
AC023043.4	up_pc9gr
PLD1	up_pc9gr
VTCN1	up_pc9gr
AC009948.3	up_pc9gr
VSIG8	up_pc9gr
FXN	up_pc9gr
AC008731.1	up_pc9gr
DPH6-AS1	up_pc9gr
GDF9	up_pc9gr
AL023775.1	up_pc9gr
MTND1P8	up_pc9gr
AC010285.1	up_pc9gr
AL133353.1	up_pc9gr
REXO5	up_pc9gr
TM4SF20	up_pc9gr
ANO9	up_pc9gr
LINC00629	up_pc9gr
LRRC56	up_pc9gr
AC093274.1	up_pc9gr
LINC00887	up_pc9gr
AC027544.1	up_pc9gr
FUOM	up_pc9gr
CFHR1	up_pc9gr
AL627171.2	up_pc9gr
AL357033.1	up_pc9gr
ITGA6	up_pc9gr
SMCO4	up_pc9gr
AC130456.2	up_pc9gr
SPSB2	up_pc9gr
IRS2	up_pc9gr
PTPN14	up_pc9gr
MTCO3P39	up_pc9gr
AL109811.2	up_pc9gr
HCG27	up_pc9gr
FCRLB	up_pc9gr
SCARF2	up_pc9gr
FZD10	up_pc9gr
ABCA12	up_pc9gr
PFN4	up_pc9gr
FAM120AOS	up_pc9gr
ARHGEF34P	up_pc9gr
CLIC1	up_pc9gr
PDK4	up_pc9gr
AC110285.1	up_pc9gr
EPCAM	up_pc9gr
NR2F2	up_pc9gr
ARHGEF5	up_pc9gr
AC002470.1	up_pc9gr
PSMD10P2	up_pc9gr
CDH3	up_pc9gr
NANOGP8	up_pc9gr
AC132219.1	up_pc9gr
RNU6-945P	up_pc9gr
AP002761.3	up_pc9gr
HMOX1	up_pc9gr
AL049779.2	up_pc9gr
URB1-AS1	up_pc9gr
AL356512.1	up_pc9gr
LRRC37A9P	up_pc9gr
AC003002.3	up_pc9gr
AC009093.6	up_pc9gr
MAPK8IP1P2	up_pc9gr
AC017104.5	up_pc9gr
AC093484.2	up_pc9gr
AL590096.1	up_pc9gr
AC025594.3	up_pc9gr
ADAM28	up_pc9gr
LINC01694	up_pc9gr
ST3GAL1P1	up_pc9gr
SAPCD1	up_pc9gr
AL139039.3	up_pc9gr
NAPSA	up_pc9gr
AL162411.1	up_pc9gr
KRT20	up_pc9gr
FNBP1P1	up_pc9gr
ZNF213-AS1	up_pc9gr
CD163L1	up_pc9gr
TSPO2	up_pc9gr
AC090515.2	up_pc9gr
DHRS4L2	up_pc9gr
RAB34	up_pc9gr
AC231981.1	up_pc9gr
MPV17	up_pc9gr
COL16A1	up_pc9gr
TMEM200B	up_pc9gr
RBPMS-AS1	up_pc9gr
GLIPR1L2	up_pc9gr
ZNF396	up_pc9gr
RPS10P5	up_pc9gr
AC005387.2	up_pc9gr
MIR580	up_pc9gr
MB21D2	up_pc9gr
DHRS4	up_pc9gr
PRMT9	up_pc9gr
BX088645.1	up_pc9gr
SCO2	up_pc9gr
ICA1	up_pc9gr
ABHD11-AS1	up_pc9gr
LINC01232	up_pc9gr
LINC00467	up_pc9gr
FAM66B	up_pc9gr
AL157400.4	up_pc9gr
AC083843.2	up_pc9gr
LINC02166	up_pc9gr
IFIH1	up_pc9gr
LINC00634	up_pc9gr
AC027117.1	up_pc9gr
IL1B	up_pc9gr
AC007114.1	up_pc9gr
CDKL5	up_pc9gr
VGF	up_pc9gr
METTL27	up_pc9gr
CWC15	up_pc9gr
FAM57B	up_pc9gr
AC135506.1	up_pc9gr
TXN2	up_pc9gr
PRELP	up_pc9gr
ERRFI1	up_pc9gr
COX7C	up_pc9gr
PMP22	up_pc9gr
SLC39A1	up_pc9gr
AC002451.1	up_pc9gr
LRAT	up_pc9gr
MMP19	up_pc9gr
BCL10	up_pc9gr
EPHA10	up_pc9gr
NALT1	up_pc9gr
TECPR1	up_pc9gr
C11orf70	up_pc9gr
CYP1B1	up_pc9gr
ART5	up_pc9gr
BCDIN3D-AS1	up_pc9gr
BEAN1	up_pc9gr
AC009994.1	up_pc9gr
CCDC24	up_pc9gr
MYADM	up_pc9gr
RPL39L	up_pc9gr
NAT14	up_pc9gr
AC006449.3	up_pc9gr
MYO1B	up_pc9gr
AC010168.2	up_pc9gr
RASSF7	up_pc9gr
C17orf67	up_pc9gr
ZNF843	up_pc9gr
FLVCR1	up_pc9gr
ALOX5	up_pc9gr
AC007388.1	up_pc9gr
AL121990.1	up_pc9gr
AC099667.1	up_pc9gr
CRYM	up_pc9gr
ZNF197	up_pc9gr
AL359962.1	up_pc9gr
APOL6	up_pc9gr
AC068580.3	up_pc9gr
EVI5L	up_pc9gr
BTG1	up_pc9gr
LINC00514	up_pc9gr
SFR1	up_pc9gr
HIST1H2AE	up_pc9gr
VAMP1	up_pc9gr
AC114550.1	up_pc9gr
MIR320B2	up_pc9gr
LINC01273	up_pc9gr
AC135178.2	up_pc9gr
ABCA1	up_pc9gr
CLEC2B	up_pc9gr
REST	up_pc9gr
AC093382.1	up_pc9gr
C2orf27A	up_pc9gr
ETDC	up_pc9gr
CGB5	up_pc9gr
C1orf56	up_pc9gr
DCLK1	up_pc9gr
AC007319.1	up_pc9gr
STIM1	up_pc9gr
LINC01719	up_pc9gr
MORN1	up_pc9gr
METRN	up_pc9gr
RN7SL689P	up_pc9gr
RHOA	up_pc9gr
LINC01572	up_pc9gr
HCAR3	up_pc9gr
NUDT18	up_pc9gr
AC079148.1	up_pc9gr
AC104986.2	up_pc9gr
LITAF	up_pc9gr
ZBTB43	up_pc9gr
SLC34A1	up_pc9gr
AC105760.2	up_pc9gr
OR7E102P	up_pc9gr
SLC27A1	up_pc9gr
HADHAP2	up_pc9gr
TAF1A-AS1	up_pc9gr
AC012358.3	up_pc9gr
LMBRD2	up_pc9gr
ADRA1B	up_pc9gr
NUDT6	up_pc9gr
RGS7	up_pc9gr
CCL20	up_pc9gr
ADAL	up_pc9gr
AC069257.1	up_pc9gr
VPS37D	up_pc9gr
AC004982.2	up_pc9gr
TRIM69	up_pc9gr
AP006621.3	up_pc9gr
C12orf80	up_pc9gr
CD46	up_pc9gr
AC018638.1	up_pc9gr
FAM86C1	up_pc9gr
SNRPGP14	up_pc9gr
AC008747.1	up_pc9gr
CDKL2	up_pc9gr
SCEL	up_pc9gr
DCDC2	up_pc9gr
SLC35E2B	up_pc9gr
AIMP2	up_pc9gr
AP3B2	up_pc9gr
ARNTL	up_pc9gr
PUS10	up_pc9gr
RGS9BP	up_pc9gr
ANKRD31	up_pc9gr
AL662890.1	up_pc9gr
ZBTB8A	up_pc9gr
FAM86B2	up_pc9gr
AL353150.1	up_pc9gr
ANGPT1	up_pc9gr
EPHA1	up_pc9gr
HMGA2	up_pc9gr
INTS3	up_pc9gr
FAM227B	up_pc9gr
AL162231.2	up_pc9gr
DNAH10OS	up_pc9gr
SEPT7-AS1	up_pc9gr
AC244153.1	up_pc9gr
AC138956.1	up_pc9gr
AC022872.1	up_pc9gr
DLG2	up_pc9gr
SESN3	up_pc9gr
AP002478.1	up_pc9gr
RRP8	up_pc9gr
RPL17P11	up_pc9gr
MYH15	up_pc9gr
AC005837.1	up_pc9gr
LYRM9	up_pc9gr
ATP1A2	up_pc9gr
TG	up_pc9gr
OPTN	up_pc9gr
AC004069.1	up_pc9gr
LAMB1	up_pc9gr
NPEPPS	up_pc9gr
C10orf91	up_pc9gr
PPM1B	up_pc9gr
AC027682.6	up_pc9gr
AL442125.1	up_pc9gr
DDIT3	up_pc9gr
SPIRE1	up_pc9gr
RDH12	up_pc9gr
AC016708.1	up_pc9gr
CD52	up_pc9gr
GEMIN7	up_pc9gr
VPREB3	up_pc9gr
AC074117.2	up_pc9gr
AC104561.3	up_pc9gr
TMEM105	up_pc9gr
AL022322.1	up_pc9gr
H1FX	up_pc9gr
ALG1L9P	up_pc9gr
HOXA9	up_pc9gr
AC087645.2	up_pc9gr
C6orf136	up_pc9gr
OR1F1	up_pc9gr
ZC3H11A	up_pc9gr
PPFIBP2	up_pc9gr
AC099336.1	up_pc9gr
SMTNL1	up_pc9gr
AL451074.2	up_pc9gr
LINC02449	up_pc9gr
OSCP1	up_pc9gr
AL121772.1	up_pc9gr
MORN4	up_pc9gr
AC008014.1	up_pc9gr
PKDCC	up_pc9gr
U73166.1	up_pc9gr
STAC	up_pc9gr
FBXO48	up_pc9gr
TJP2	up_pc9gr
AC011406.1	up_pc9gr
SLC9A8	up_pc9gr
PPP1R3C	up_pc9gr
AC016999.1	up_pc9gr
GATA6-AS1	up_pc9gr
SMARCA2	up_pc9gr
CABLES1	up_pc9gr
F11R	up_pc9gr
ACTA2	up_pc9gr
GPT2	up_pc9gr
AL512274.1	up_pc9gr
SNRNP27	up_pc9gr
NME3	up_pc9gr
METTL3	up_pc9gr
SLC14A1	up_pc9gr
AC010207.1	up_pc9gr
AC233266.2	up_pc9gr
LINC01238	up_pc9gr
USH1C	up_pc9gr
MDH1B	up_pc9gr
C2orf74	up_pc9gr
PGPEP1	up_pc9gr
TRIM8	up_pc9gr
TP63	up_pc9gr
Z84485.1	up_pc9gr
LINC01124	up_pc9gr
ST18	up_pc9gr
FRMD4B	up_pc9gr
PSMB9	up_pc9gr
C3orf67	up_pc9gr
DHRS2	up_pc9gr
SNRPD2	up_pc9gr
PNCK	up_pc9gr
CLMP	up_pc9gr
FSTL1	up_pc9gr
ELMO2	up_pc9gr
CREB3L1	up_pc9gr
RPS11	up_pc9gr
MMP2	up_pc9gr
SLMAP	up_pc9gr
AC005000.1	up_pc9gr
TMEM216	up_pc9gr
FAM219A	up_pc9gr
LRRC37A5P	up_pc9gr
SMARCD3	up_pc9gr
ZHX3	up_pc9gr
APBB2	up_pc9gr
BBOX1	up_pc9gr
KLHL13	up_pc9gr
XDH	up_pc9gr
AC005865.1	up_pc9gr
CD99P1	up_pc9gr
NAPRT	up_pc9gr
KCNG1	up_pc9gr
PTPRR	up_pc9gr
RPS18	up_pc9gr
SLC10A7	up_pc9gr
BRIX1	up_pc9gr
TMSB10	up_pc9gr
ESYT1	up_pc9gr
AL645608.7	up_pc9gr
CHD8	up_pc9gr
AC009268.2	up_pc9gr
SUMO1	up_pc9gr
GP1BA	up_pc9gr
BOLA3-AS1	up_pc9gr
TPI1P1	up_pc9gr
STYK1	up_pc9gr
CHRNA10	up_pc9gr
CCNI	up_pc9gr
ITGB1P1	up_pc9gr
XAB2	up_pc9gr
NIFK-AS1	up_pc9gr
HIC2	up_pc9gr
AC016394.1	up_pc9gr
TRIM74	up_pc9gr
AK4P4	up_pc9gr
CDK14	up_pc9gr
PRKAG2-AS1	up_pc9gr
TMEM42	up_pc9gr
LINC01731	up_pc9gr
DIRAS1	up_pc9gr
AC008946.1	up_pc9gr
AC132872.4	up_pc9gr
CHD9	up_pc9gr
ARID3C	up_pc9gr
SEMA4D	up_pc9gr
ST13P5	up_pc9gr
INIP	up_pc9gr
AC019118.2	up_pc9gr
SFTA2	up_pc9gr
AC068790.6	up_pc9gr
OSBPL8	up_pc9gr
FER1L5	up_pc9gr
LONP1	up_pc9gr
EVC	up_pc9gr
TMEM254-AS1	up_pc9gr
AL354794.2	up_pc9gr
NAT10	up_pc9gr
AL512638.1	up_pc9gr
HEIH	up_pc9gr
DHRS11	up_pc9gr
AC004453.1	up_pc9gr
LHB	up_pc9gr
TAOK3	up_pc9gr
STK25	up_pc9gr
SLC12A4	up_pc9gr
TMC3-AS1	up_pc9gr
AL355974.1	up_pc9gr
AC073529.1	up_pc9gr
LSM12P1	up_pc9gr
SNORA80D	up_pc9gr
AC005052.1	up_pc9gr
LINC00460	up_pc9gr
USP6NL	up_pc9gr
BAZ1B	up_pc9gr
MTND3P25	up_pc9gr
ABCD4	up_pc9gr
AC123768.3	up_pc9gr
AC131009.2	up_pc9gr
LARP7	up_pc9gr
FAAHP1	up_pc9gr
PHF20	up_pc9gr
COL1A1	up_pc9gr
TMEM52	up_pc9gr
AL109809.1	up_pc9gr
RAB33B	up_pc9gr
TMEM266	up_pc9gr
CA11	up_pc9gr
AC106017.1	up_pc9gr
NUDT1	up_pc9gr
ACBD3	up_pc9gr
GDPD5	up_pc9gr
FOXP3	up_pc9gr
SH3TC2-DT	up_pc9gr
SELL	up_pc9gr
CIAO1	up_pc9gr
LGI2	up_pc9gr
RNF223	up_pc9gr
CAVIN3	up_pc9gr
ANKRD6	up_pc9gr
WDR45	up_pc9gr
LTBP4	up_pc9gr
CIDECP	up_pc9gr
AC092171.2	up_pc9gr
SIRT6	up_pc9gr
U51244.1	up_pc9gr
CNPY4	up_pc9gr
NAT8L	up_pc9gr
CTDSP2	up_pc9gr
DUSP4	up_pc9gr
EXOSC7	up_pc9gr
ROR2	up_pc9gr
ZBTB48	up_pc9gr
TRAV18	up_pc9gr
BUD31	up_pc9gr
MAOA	up_pc9gr
FAM174A	up_pc9gr
AC091185.1	up_pc9gr
AC004837.2	up_pc9gr
FBXO11	up_pc9gr
PSMG4	up_pc9gr
AP4B1-AS1	up_pc9gr
RNA5SP122	up_pc9gr
C6orf15	up_pc9gr
CDK8	up_pc9gr
ALG2	up_pc9gr
AL358473.1	up_pc9gr
KCNIP2-AS1	up_pc9gr
AC243964.2	up_pc9gr
TPM3	up_pc9gr
EIF1	up_pc9gr
AP001619.1	up_pc9gr
NTHL1	up_pc9gr
AC024451.4	up_pc9gr
RPS28	up_pc9gr
RASA4B	up_pc9gr
RPL18AP3	up_pc9gr
GPN2	up_pc9gr
COQ9	up_pc9gr
AL096828.3	up_pc9gr
AC005592.1	up_pc9gr
AC040918.1	up_pc9gr
PMM1	up_pc9gr
AC015987.1	up_pc9gr
CBLL1	up_pc9gr
AC133644.2	up_pc9gr
VAX2	up_pc9gr
SETDB1	up_pc9gr
NFE4	up_pc9gr
CPEB3	up_pc9gr
INTS1	up_pc9gr
CAMTA1	up_pc9gr
LINC02341	up_pc9gr
GMPPA	up_pc9gr
PTP4A2	up_pc9gr
IL24	up_pc9gr
AL157400.2	up_pc9gr
MLF1	up_pc9gr
SEC14L1	up_pc9gr
AC100830.1	up_pc9gr
THADA	up_pc9gr
NDUFS4	up_pc9gr
PDZD3	up_pc9gr
FAXC	up_pc9gr
STPG1	up_pc9gr
COX8A	up_pc9gr
SMIM27	up_pc9gr
SF3B6	up_pc9gr
AL021707.3	up_pc9gr
C9orf16	up_pc9gr
AC015712.1	up_pc9gr
NIPSNAP3B	up_pc9gr
CLCN4	up_pc9gr
ACAP2-IT1	up_pc9gr
C11orf72	up_pc9gr
PWP2	up_pc9gr
NPR1	up_pc9gr
DNAH11	up_pc9gr
MTMR14	up_pc9gr
USP42	up_pc9gr
IPP	up_pc9gr
UQCRC1	up_pc9gr
AC108488.1	up_pc9gr
ADAM23	up_pc9gr
GTF2IP20	up_pc9gr
POLG	up_pc9gr
RICTOR	up_pc9gr
RUNDC3A-AS1	up_pc9gr
RAG1	up_pc9gr
AL021937.3	up_pc9gr
PTPN5	up_pc9gr
POMT1	up_pc9gr
AC026412.3	up_pc9gr
OGFOD2	up_pc9gr
ARSH	up_pc9gr
DDHD2	up_pc9gr
UPF3A	up_pc9gr
NCF4-AS1	up_pc9gr
USP46-AS1	up_pc9gr
AL139041.1	up_pc9gr
ZNF687	up_pc9gr
DNAH17-AS1	up_pc9gr
AL353803.5	up_pc9gr
METTL21A	up_pc9gr
AC020915.3	up_pc9gr
SARS	up_pc9gr
LINC01298	up_pc9gr
CACNB1	up_pc9gr
SETMAR	up_pc9gr
MAN2B1	up_pc9gr
OFD1	up_pc9gr
AHCYL2	up_pc9gr
AL928654.4	up_pc9gr
RN7SL809P	up_pc9gr
AL590867.2	up_pc9gr
AC011487.1	up_pc9gr
AC138392.1	up_pc9gr
PEX16	up_pc9gr
KDM4B	up_pc9gr
GNG12	up_pc9gr
HABP4	up_pc9gr
CNTN2	up_pc9gr
AP002954.1	up_pc9gr
DUTP6	up_pc9gr
AC004980.1	up_pc9gr
LINC01765	up_pc9gr
UBN2	up_pc9gr
FUT4	up_pc9gr
DBH	up_pc9gr
HIST1H2BJ	up_pc9gr
RN7SKP17	up_pc9gr
AC106820.3	up_pc9gr
RP9	up_pc9gr
LINC01450	up_pc9gr
UQCRHL	up_pc9gr
AC087783.2	up_pc9gr
MRM3	up_pc9gr
AC007285.1	up_pc9gr
AC106795.3	up_pc9gr
DCUN1D5	up_pc9gr
LTBR	up_pc9gr
TDRKH	up_pc9gr
GNB4	up_pc9gr
ANKLE2	up_pc9gr
NBPF3	up_pc9gr
SLC39A5	up_pc9gr
DNHD1	up_pc9gr
AL391422.1	up_pc9gr
ZNF350	up_pc9gr
GIPR	up_pc9gr
GFI1	up_pc9gr
FHL1	up_pc9gr
SMC6	up_pc9gr
RTN4RL1	up_pc9gr
OSGEP	up_pc9gr
RPL4	up_pc9gr
DLEC1	up_pc9gr
E4F1	up_pc9gr
AL139396.1	up_pc9gr
PXN-AS1	up_pc9gr
RPS21	up_pc9gr
XCR1	up_pc9gr
ARID5A	up_pc9gr
RBM6	up_pc9gr
CYSTM1	up_pc9gr
AC138696.2	up_pc9gr
WAPL	up_pc9gr
IGSF8	up_pc9gr
FOXCUT	up_pc9gr
MAGEB6	up_pc9gr
LINC00475	up_pc9gr
ACAD11	up_pc9gr
IFITM10	up_pc9gr
AC092803.2	up_pc9gr
C16orf71	up_pc9gr
SCHIP1	up_pc9gr
HDAC3	up_pc9gr
BTK	up_pc9gr
TMEM97P1	up_pc9gr
AC004803.1	up_pc9gr
AC068025.1	up_pc9gr
PIGL	up_pc9gr
MOB1B	up_pc9gr
MRPL57	up_pc9gr
OLFML2A	up_pc9gr
DNAJC30	up_pc9gr
UIMC1	up_pc9gr
ZCCHC12	up_pc9gr
ATP7B	up_pc9gr
PRSS46P	up_pc9gr
POLD2	up_pc9gr
PPM1H	up_pc9gr
PLSCR4	up_pc9gr
HIST1H4I	up_pc9gr
LGALS7B	up_pc9gr
AL022324.1	up_pc9gr
PDAP1	up_pc9gr
ZNF146	up_pc9gr
POLRMT	up_pc9gr
GSTM2P1	up_pc9gr
AL133216.2	up_pc9gr
KLHL6	up_pc9gr
LINC01607	up_pc9gr
EIF4E2	up_pc9gr
NENF	up_pc9gr
AC007686.1	up_pc9gr
AKIRIN1	up_pc9gr
PDGFRB	up_pc9gr
IL17D	up_pc9gr
VRK2	up_pc9gr
RDX	up_pc9gr
CHRNB1	up_pc9gr
EHBP1L1	up_pc9gr
DCTN1	up_pc9gr
TMEM241	up_pc9gr
C1QBP	up_pc9gr
TMEM248	up_pc9gr
AC008105.2	up_pc9gr
SEMA3G	up_pc9gr
GRHL1	up_pc9gr
AC108058.1	up_pc9gr
NDUFAF8	up_pc9gr
R3HDM2	up_pc9gr
SLC2A10	up_pc9gr
TRIM45	up_pc9gr
CCDC188	up_pc9gr
PAQR3	up_pc9gr
OSER1	up_pc9gr
AC147067.1	up_pc9gr
CMA1	up_pc9gr
CENPL	up_pc9gr
MTRNR2L8	up_pc9gr
AC024293.1	up_pc9gr
ARHGEF26	up_pc9gr
PAWR	up_pc9gr
AC006213.3	up_pc9gr
TIGD2	up_pc9gr
ASTN2	up_pc9gr
AP003084.1	up_pc9gr
AC011815.1	up_pc9gr
LINC01629	up_pc9gr
COQ10A	up_pc9gr
FAM161A	up_pc9gr
TANC2	up_pc9gr
ZMYM5	up_pc9gr
PGM1	up_pc9gr
ZNF586	up_pc9gr
POLR3G	up_pc9gr
LINC01301	up_pc9gr
DCT	up_pc9gr
RPS19P3	up_pc9gr
RF00072	up_pc9gr
AL049543.1	up_pc9gr
RCAN1	up_pc9gr
PELI3	up_pc9gr
PROSER3	up_pc9gr
LIMD2	up_pc9gr
NTN4	up_pc9gr
PECR	up_pc9gr
WFIKKN1	up_pc9gr
SYDE2	up_pc9gr
DDN-AS1	up_pc9gr
CD177	up_pc9gr
JAK2	up_pc9gr
PHC1P1	up_pc9gr
SIRPG	up_pc9gr
ZNF264	up_pc9gr
ARMC10P1	up_pc9gr
MYCL	up_pc9gr
SNRPFP1	up_pc9gr
ICA1L	up_pc9gr
VN1R42P	up_pc9gr
CASC10	up_pc9gr
AQP11	up_pc9gr
KALRN	up_pc9gr
AC018926.3	up_pc9gr
AC009163.5	up_pc9gr
RNA5SP323	up_pc9gr
LAMTOR5	up_pc9gr
C5orf56	up_pc9gr
GLIPR2	up_pc9gr
OR7E1P	up_pc9gr
FAM49A	up_pc9gr
EHD2	up_pc9gr
AL138781.1	up_pc9gr
UBE2Q2P2	up_pc9gr
SNRPGP10	up_pc9gr
ZNF614	up_pc9gr
PARD6G	up_pc9gr
NUP133	up_pc9gr
MIR221	up_pc9gr
AC007663.3	up_pc9gr
XXYLT1	up_pc9gr
GRPEL2	up_pc9gr
INPP5B	up_pc9gr
SNTA1	up_pc9gr
TRIM56	up_pc9gr
GCM1	up_pc9gr
UBE2J1	up_pc9gr
TCFL5	up_pc9gr
AL139035.1	up_pc9gr
LINC00868	up_pc9gr
TPI1P2	up_pc9gr
LINC01907	up_pc9gr
AC022079.1	up_pc9gr
NCK2	up_pc9gr
OXA1L	up_pc9gr
FMO9P	up_pc9gr
DNAJC25	up_pc9gr
MIR4783	up_pc9gr
AC119044.1	up_pc9gr
E2F4	up_pc9gr
HSCB	up_pc9gr
AC126696.1	up_pc9gr
MEX3D	up_pc9gr
NPIPP1	up_pc9gr
TAF1D	up_pc9gr
AC093616.1	up_pc9gr
SRGAP2C	up_pc9gr
DVL1	up_pc9gr
FBXO3	up_pc9gr
GPR157	up_pc9gr
AL158825.2	up_pc9gr
CTAGE4	up_pc9gr
AC079779.2	up_pc9gr
AC007728.2	up_pc9gr
ZFAS1	up_pc9gr
NOL4L	up_pc9gr
BTBD10	up_pc9gr
BAIAP3	up_pc9gr
PTP4A3	up_pc9gr
CALCOCO2	up_pc9gr
CDK16	up_pc9gr
GEMIN6	up_pc9gr
HRAS	up_pc9gr
LINC-PINT	up_pc9gr
JAGN1	up_pc9gr
ARSK	up_pc9gr
RBP7	up_pc9gr
DSC1	up_pc9gr
HOTAIRM1	up_pc9gr
FAM45BP	up_pc9gr
AL121658.1	up_pc9gr
SPATA32	up_pc9gr
LEMD1-AS1	up_pc9gr
WSB1	up_pc9gr
PPIAP59	up_pc9gr
SRRD	up_pc9gr
NYAP1	up_pc9gr
LINC00896	up_pc9gr
ZBTB41	up_pc9gr
AC005776.2	up_pc9gr
MME	up_pc9gr
VAT1	up_pc9gr
PCNX2	up_pc9gr
CCDC14	up_pc9gr
TUFM	up_pc9gr
THEG	up_pc9gr
WDR26	up_pc9gr
KRT34	up_pc9gr
AL139289.1	up_pc9gr
SGSM3	up_pc9gr
NR4A3	up_pc9gr
PIH1D3	up_pc9gr
SOCS3	up_pc9gr
GAS1RR	up_pc9gr
ZNF839	up_pc9gr
SOX15	up_pc9gr
CCNA2	up_pc9gr
AGAP12P	up_pc9gr
RUVBL2	up_pc9gr
WNT10B	up_pc9gr
AL390729.1	up_pc9gr
PEAK3	up_pc9gr
FALEC	up_pc9gr
RPAP1	up_pc9gr
RPL27	up_pc9gr
NLRP9	up_pc9gr
MT-ND6	up_pc9gr
EPN1	up_pc9gr
LINC00908	up_pc9gr
WDPCP	up_pc9gr
PJVK	up_pc9gr
GAL	up_pc9gr
SLC30A2	up_pc9gr
TSTD1	up_pc9gr
AUH	up_pc9gr
SLC25A39	up_pc9gr
KIF1B	up_pc9gr
AMOTL2	up_pc9gr
ABHD14B	up_pc9gr
C4BPAP1	up_pc9gr
PSRC1	up_pc9gr
FARS2	up_pc9gr
AMPD3	up_pc9gr
NPHP3	up_pc9gr
GLTPD2	up_pc9gr
FBXO7	up_pc9gr
AC044810.2	up_pc9gr
NEURL1-AS1	up_pc9gr
LRRFIP1	up_pc9gr
RN7SL7P	up_pc9gr
FKTN	up_pc9gr
AC082651.3	up_pc9gr
CRTAP	up_pc9gr
STYXL1	up_pc9gr
TK2	up_pc9gr
RP5-1125A11.7	up_pc9gr
AC074117.1	up_pc9gr
DMAC2	up_pc9gr
A1BG-AS1	up_pc9gr
AC127070.1	up_pc9gr
AP001781.1	up_pc9gr
PRELID2	up_pc9gr
STK39	up_pc9gr
CCZ1B	up_pc9gr
MMP24	up_pc9gr
CKS2	up_pc9gr
AC099489.3	up_pc9gr
AC068620.1	up_pc9gr
SETP20	up_pc9gr
SLC25A24	up_pc9gr
MRPL22	up_pc9gr
GADD45B	up_pc9gr
[truncated: 15,483 more rows]

## Sheet: E_VD-Results_UpPC9DownMLN
Names	total	Gene ID
#2UpPC9GR #3DownMLN	1466	HAUS2
		BSN-AS2
		AL360093.1
		STK16
		AGPAT1
		AL451074.6
		SUGCT
		BX005019.1
		MAP1LC3C
		NUDT9P1
		BBS12
		HMGB3P31
		HIST1H1PS1
		GRK5
		VWA5A
		AC004890.3
		RNF4
		FPGT
		AC116424.1
		AC023790.2
		MMP16
		AC092964.1
		AL359073.1
		EMILIN1
		TAF12
		AP002990.1
		AC007952.2
		AC079866.2
		GRXCR2
		HLA-J
		CYP1A1
		LINC01270
		UNC13B
		CETN4P
		AC027307.2
		SLC9A3
		FAM218A
		LILRA6
		CR381653.1
		AC093915.1
		GATA1
		KLF4
		MIR5010
		LMO4
		KRCC1
		TFEC
		LCN15
		IL23A
		FST
		VWCE
		SCRN1
		NUGGC
		METTL7B
		AC114812.4
		UPK1B
		SVOPL
		AP001830.1
		AC148477.3
		CASP1
		PRRT1
		RAC1P2
		SECTM1
		AL672207.1
		TCTA
		AC079075.1
		B2M
		C6orf141
		C6orf52
		TLR5
		KLRG1
		HPCAL4
		SEMA3B-AS1
		ALG13-AS1
		LRRC37A16P
		DICER1-AS1
		AC132872.2
		FOLR2
		DDIT4L
		RPL23AP97
		LINC00622
		AC138466.4
		OR2A7
		AC093503.1
		KCTD2
		MBL1P
		AC106864.1
		PIANP
		AL365271.1
		PIFO
		CATSPER2P1
		KLHDC1
		IL9RP3
		AC021739.5
		SYNPO2L
		ZNF775
		ASB4
		PPP1R15A
		ALOX12
		RPE
		MRAS
		AC079880.1
		TUBB2B
		AC018816.1
		AL355574.1
		RNF167
		ZSCAN12P1
		VN1R20P
		TRBV29OR9-2
		SCG2
		AK8
		SNX18
		TIGD4
		NAP1L5
		TARS2
		ENPEP
		C1RL-AS1
		AC009113.1
		MAP3K12
		PSMG3-AS1
		AL033543.1
		FBXO47
		GRPR
		AL353807.3
		AL683813.1
		MPIG6B
		AC096540.1
		GNG7
		SPATA6L
		AL132780.2
		THRA
		ENO3
		ASIC4
		DET1
		SLC1A3
		FNDC10
		AC106869.1
		CHP1
		HNRNPA1P59
		C2orf15
		AC012358.1
		FTCDNL1
		C20orf194
		AL591684.2
		AP000924.1
		C22orf39
		ANKRD33B
		PER1
		AC005154.1
		LMCD1
		AC012512.1
		AC005046.1
		BCL6B
		CD200R1
		C22orf15
		ADNP
		RNY4P10
		AL391069.2
		ARHGAP24
		AGBL2
		AC009509.1
		AL355312.1
		LINC00663
		WDR83
		AC133552.5
		THUMPD3-AS1
		UGT8
		AC145422.1
		HINT1
		AC109347.1
		AC005229.4
		RHOBTB1
		HSD3BP5
		AOX1
		ABTB1
		PHKB
		RBAK
		EHHADH
		FKBP9P1
		RNASE4
		PARD6B
		AC040160.2
		MAST4-AS1
		AC079684.1
		KDM4A-AS1
		UGCG
		AL121895.1
		PXT1
		HCP5
		UCN
		AC110373.1
		AC018645.2
		SLC39A14
		AL020996.1
		AC106782.1
		YBX2
		AJ003147.2
		LYPLA1
		AL589986.2
		EML1
		LINC00482
		CHMP5
		ESRRAP2
		AC010198.1
		AL645608.1
		RAP1GAP2
		PON1
		AC046143.1
		RNU6-100P
		AL512329.2
		AL022323.5
		HMCN1
		CCDC186
		AC005736.2
		SIRT4
		ARL4C
		UBQLNL
		AC114812.2
		LPXN
		ALDH1A2
		EGR1
		THSD1
		AL354872.2
		AC005632.2
		AC004835.1
		AC098934.2
		KLF6
		MROH3P
		AC010186.3
		HECW2
		AL592114.3
		AL354892.2
		PPP1R42
		RNF216P1
		SMPD1
		MOCS3
		HSF2BP
		AC046143.2
		AL136309.2
		RNU6-875P
		PLA2G4A
		MIR2116
		HLA-DMB
		AC008467.1
		FAM229B
		PPP2R5C
		AL137145.1
		AC008147.2
		NDUFB5
		AC022079.2
		SLC26A4
		PYCR1
		AC121338.2
		EREG
		SUMF2
		AC244033.1
		PTX3
		AC090971.3
		ANG
		RIOK3
		NSUN5P1
		ATP6V0E2-AS1
		ABLIM2
		AC016168.1
		AC138207.6
		GTF3C2
		FFAR1
		AC007663.1
		TXNIP
		SNAP23P1
		SRSF8
		GLMP
		H1F0
		AC083843.1
		AC242426.2
		LINC01312
		AC009309.1
		Z93930.3
		THAP2
		ITGAM
		AL133297.1
		DUSP19
		AC110285.7
		LRIF1
		OSCAR
		AC107294.2
		AC007249.2
		GPR179
		AC106739.1
		PLCG2
		SDAD1P1
		AL080250.1
		DMKN
		MSH5
		BLACAT1
		B3GNT4
		AC008555.8
		PSORS1C1
		AL445231.1
		SP1
		C1GALT1C1L
		AC010900.1
		AC017100.1
		SERPINB1
		GDPD3
		FOS
		SRP14-AS1
		TUBB6
		AC073073.1
		FGF2
		PRODH
		CORO1A
		SLC4A1AP
		AC015849.5
		COPS8
		AC020658.6
		AC010531.5
		ENTPD3-AS1
		MYRFL
		AC129492.5
		AL591895.1
		LOH12CR2
		VWA7
		ISG20
		ANKRD29
		LINC00926
		ATP6V1E1P1
		ARHGAP31-AS1
		MRPL40
		AC116407.1
		ZNF34
		AL049794.1
		FAM86EP
		XBP1P1
		SCML1
		RAB13
		CDKN1C
		ZFAND3
		AL645608.3
		PRSS16
		AL158207.2
		ADAMTS13
		SPATA21
		GBP3
		AL354798.1
		FGL1
		TLE6
		LINC01634
		PARP4P2
		UGP2
		DNMBP-AS1
		GPX3
		CEP57L1P1
		AC009121.2
		AC016405.1
		LINC01426
		LINC01585
		AC025524.2
		TRIM59
		AHNAK2
		AC080162.1
		RN7SL268P
		C1orf116
		MTMR3
		AC073349.2
		CUTA
		AC016355.1
		MTMR11
		MIR553
		SUMO2P17
		ATP2B1
		AL590729.1
		IGF2BP1
		RNU6-82P
		CD44-AS1
		FBLN5
		BORCS8
		APBA1
		COX7A2L
		BEAN1-AS1
		AC021086.1
		GDF15
		AC008734.1
		PON3
		SEC1P
		AES
		BBC3
		ZNF181
		DAD1
		AC026954.1
		AC020763.1
		BVES-AS1
		CCDC106
		USP32P2
		WNT8B
		LRRC8D
		INE1
		TMEM191C
		ALDH2
		AC068790.3
		PIN1
		RASA4DP
		ZSCAN16
		AL008729.1
		AC022306.2
		AC107884.1
		FAHD2P1
		GPR19
		ZMAT5
		PPIAP29
		EPX
		AC020604.1
		AP003774.1
		ZNF467
		LGI4
		AC012170.2
		LINC01358
		AC069257.2
		AL162615.1
		PJA2
		AGTRAP
		NANOGP7
		TPMT
		SLC5A4-AS1
		ITFG2-AS1
		AL024507.2
		ZC3H6
		LINC01786
		STMN1P1
		TMEM25
		LAMB3
		PPL
		Z97985.1
		CCDC113
		CEBPD
		AL731577.2
		IL1A
		GNRH1
		AC005391.1
		LINC01237
		RABGEF1
		MST1P2
		ROPN1
		AC099850.3
		AC004771.5
		MSANTD3
		HS3ST6
		ACBD7
		EME2
		TRAPPC5
		ATP2B1-AS1
		ZFP90
		AP2B1
		RNA5SP474
		IGFN1
		GPR1
		AC010201.1
		GTF2IP13
		PDZD7
		TRIM14
		BLOC1S5
		FIGN
		AC135721.1
		ZNRF3-AS1
		TM4SF1-AS1
		LINC00672
		ZBTB4
		NME4
		IRF2BPL
		GAPDHP58
		CD68
		ANO7L1
		CYTH4
		SLC25A42
		AC105339.3
		SLC1A6
		GGACT
		AC068533.3
		MICD
		RBM34
		AP000553.1
		SYNE3
		RSG1
		ZNF717
		FYB1
		USP46
		TMEM236
		AP001025.1
		AC020661.1
		NDUFV1
		ATP1A1-AS1
		C1QTNF6
		AC093864.1
		ARL6IP5
		TNKS1BP1
		HELB
		AC044860.1
		DNAJC27
		MTFP1
		EEF1AKMT3
		MAPK13
		AC006449.6
		GATA3-AS1
		AC013472.3
		NSMCE1
		OR1F2P
		ADTRP
		CRMP1
		PDE4B
		CLIP4
		FABP6
		CCDC180
		LINC00339
		LINC00888
		PCYOX1L
		ANKRD13A
		TMEM229B
		IL32
		AL008723.1
		CAT
		AC024075.3
		MADCAM1
		AC022165.1
		DCAKD
		AL138762.1
		CD22
		PPIC
		AC084033.3
		PNPLA7
		SHISA7
		STX1B
		UBALD2
		ANKRD20A8P
		WDR83OS
		KCND2
		MIR3653
		AFTPH
		SBF2-AS1
		TSPAN4
		AP000356.3
		MORF4L1
		ZNF350-AS1
		AC010894.2
		TUBA4B
		AMOT
		ETV1
		ZFP42
		ZKSCAN2
		ERC1
		BCRP8
		SCARF1
		MINCR
		GAPDHP22
		C17orf97
		AC100800.1
		MED20
		NFE2
		LINC00884
		SLC6A4
		IFT46
		GK
		HMGB2P1
		AP002026.1
		AL118558.4
		AIDA
		LYRM1
		AC079322.1
		AC009163.7
		UBE2F
		AC004264.2
		ARMCX5
		LINC00484
		TEX19
		AC104596.1
		TRIR
		TFCP2L1
		AL136964.1
		AC010654.1
		POLM
		AC127526.2
		CENPH
		ELF3
		LCN12
		TSEN15
		AC107214.2
		GCM2
		ZNF547
		GPATCH2L
		KRAS
		SIPA1L2
		AC005740.3
		MGAT5B
		PIM1
		NR3C1
		MAP2K6
		CDC37L1
		WDR24
		TTC25
		CXorf58
		TLL2
		ACKR4
		SGSM1
		RHNO1
		ACTG1P15
		NAT6
		VWA8-AS1
		LCMT1-AS1
		AC025166.1
		RGL3
		FGFR2
		PDPR
		LINC01759
		AP1M1
		KLHL7-AS1
		PCDHB4
		LINC02018
		AL354809.1
		AL021807.1
		TTC39C
		KXD1
		AC019080.4
		AL365181.4
		MIDN
		CTH
		AC116050.1
		AL157400.3
		MRPL17
		ANKRD24
		TCEAL4
		GRB14
		AL354877.1
		BHLHA15
		SPIN1
		BMPER
		AC009171.2
		RNU7-59P
		EPHX2
		MGARP
		AL731533.2
		HHAT
		CERNA1
		CCDC68
		AC114271.1
		LHX1
		GRTP1-AS1
		AC098820.1
		CD34
		AL358072.1
		RPS27AP10
		DPH5
		FAM183A
		AC012640.2
		CCDC36
		TAF6
		LINC01852
		HOXA11-AS
		PDE2A
		YPEL4
		TBCC
		LSM6
		TVP23B
		AL358075.2
		RNU7-47P
		HIST1H1T
		TRIM21
		CFI
		AP001453.2
		TAT
		RNA5-8SN4
		SNAP23
		LENEP
		RHOB
		NEU4
		AC138393.3
		ELOVL6
		PPIL2
		TNFAIP8
		CALCRL
		ICAM1
		ZNF674
		AL354733.2
		AC005618.1
		TAS1R1
		AL109811.3
		C9orf131
		STAP2
		SDHAF4
		TRAPPC12-AS1
		NBPF11
		TRIM32
		ANPEP
		WWC2-AS2
		AC007036.1
		RAD17
		LINC02475
		RAB30
		AL355336.1
		AC021491.2
		BTBD19
		AC007014.2
		CFAP52
		ENPP1
		UPP1
		SYT14
		CSF2RA
		KSR2
		ATP2A1-AS1
		DUSP15
		STPG4
		DUSP16
		CD24P4
		SUPT6H
		LINC00886
		DAP3P1
		SMG7-AS1
		GEM
		ALKBH3
		ZFYVE19
		CES1P1
		AC040934.1
		GRIFIN
		EXOC3-AS1
		CISH
		RASSF6
		SNORD63
		GLIPR1L1
		AC073957.1
		AC245884.3
		GPR61
		TMCC1-AS1
		AL162595.1
		TTC30A
		DPY19L2P3
		DNAJC19
		CD44
		FAM153A
		BTG2
		AL390719.1
		SIRPB2
		TRIB3
		ZNF446
		CCDC28B
		KCNK3
		AC006504.3
		IGLV5-52
		AC023157.1
		C9orf43
		CCDC34
		SLC26A10
		STX8
		CNBD2
		SNX16
		PDCD5
		FGGY
		AC020931.1
		AC008267.5
		TNFRSF9
		SMUG1
		RPS29P17
		FRS2
		ST8SIA4
		LINC01843
		GAS2L1
		AL359091.2
		KLHL41
		MYO15B
		LIMD1
		VIM-AS1
		COG1
		SLC9A9
		CFAP221
		F7
		SLC13A4
		PAQR8
		AL049555.1
		SNORD46
		NFIL3
		FAM234A
		AC098487.1
		AL590004.4
		SLC3A1
		AC147651.1
		YIPF2
		AHR
		NFE2L2
		AC069335.1
		SKAP2
		JADE1
		TAGAP
		DENND5B-AS1
		MIR503HG
		CCM2L
		PRR36
		HOXB8
		P2RX6P
		NECAB2
		MIR554
		ZNF419
		AC022445.1
		AL133227.1
		KLF2
		PGLYRP1
		TNFRSF1A
		AC025031.1
		CD8A
		AC012184.3
		CA9
		XKRX
		AC093901.1
		AL162377.1
		AC124944.2
		LINC01783
		ZFHX2
		NR2F2-AS1
		AL355102.4
		AC004951.2
		AREG
		COG8
		ADIRF-AS1
		AC068446.2
		PHYH
		ULBP1
		ALPK1
		SLC11A1
		RALB
		PCDHGA4
		HOXC-AS3
		AC098484.1
		KRT86
		FZD10-AS1
		CFAP74
		TRIM6
		AC131009.1
		PROC
		DEPDC1
		ALG1L6P
		AC100757.1
		AC118658.2
		SPRY4-IT1
		ZNF114
		AC025031.4
		CR381653.2
		AL132857.2
		GTSE1-AS1
		UNC119B
		ERCC4
		SDSL
		EXD1
		FAM83B
		MIR222
		SP110
		CALHM1
		BIVM
		THSD7A
		ZMAT1
		AC002116.2
		ZSCAN21
		AL356275.1
		UGT1A7
		AC084018.2
		KIAA1257
		PLEKHB2
		RPL28
		BIN2
		APOLD1
		C7orf61
		AC073343.2
		UNC13A
		CFL1P1
		MRPS31P5
		GAL3ST4
		HHLA3
		BAHD1
		FTH1P3
		HCG9
		GRK4
		PRPH
		AC006159.1
		AC027243.1
		AC009878.1
		SNAPC2
		ZNF559
		AL021937.2
		LURAP1L-AS1
		NHS
		FBXL16
		AP000350.7
		CDKN1A
		LIPC
		ZNF660
		AL157838.1
		AC009720.1
		AC010643.1
		AJUBA
		SV2A
		CIAPIN1
		FRMPD1
		HIGD2B
		DNAJC19P5
		NOVA1
		COL26A1
		RPL21P39
		AC062017.1
		FOSB
		CPE
		TRIM46
		MKS1
		MIR4534
		TMEM269
		RNF222
		ABCA5
		AC245884.8
		AP002851.1
		LENG8-AS1
		EZH2P1
		AC009229.4
		ATP1B1P1
		PSD3
		OR2A4
		RDM1
		DPY19L1P2
		OR10AD1
		RCN3
		AC245297.1
		ZNF554
		LZTR1
		ENPP4
		RNF170
		IRF1
		PTK2B
		USP20
		ZFP3
		PTPN12
		PNPLA4
		MIR3929
		MIR3682
		DSTNP2
		LINC01220
		AC026979.3
		RPL7L1
		LINC01504
		FAS
		AC079880.2
		ANAPC13
		RNF145
		LINC01136
		PTPN20
		RNU6-190P
		NUPR1
		GLB1L
		AC007342.3
		AC145285.3
		CDC37L1-AS1
		AC010531.6
		RNA5SP78
		ZFP36L2
		LRRFIP1P1
		AC079610.2
		SCNN1D
		ADAM1B
		IFITM2
		STUB1
		AL353759.1
		P2RX6
		EGR2
		TMEM8B
		GAPDHP32
		YDJC
		AC004812.2
		AC022613.2
		PHC2
		LRRIQ3
		MYH11
		ZNRD1ASP
		CDC42EP2
		TGFBR1
		GBP2
		ATP1B2
		TIE1
		HIST1H3G
		RFX3-AS1
		AXDND1
		IQCD
		SSUH2
		CASP7
		TMEM106A
		ZNF630
		AC055811.2
		TMEM129
		G0S2
		MIR573
		CELF3
		AC137630.3
		ALG1L13P
		LASP1
		PIPSL
		JHDM1D-AS1
		AL606534.1
		SUGT1P1
		ARIH2OS
		BCAS4
		NNT-AS1
		SLC7A2
		AL391832.3
		NDUFB10
		ABCG2
		AL450384.2
		AL133330.1
		AL133338.2
		AC016877.3
		FITM1
		SNORA22
		AC100771.2
		POC1B-AS1
		FAM198B
		MIR6819
		HIST1H2BG
		SEPSECS
		CT62
		ANKFN1
		AL645608.9
		CXorf57
		S1PR1
		CD79A
		CCDC18-AS1
		IL1R2
		BUD13P1
		NBPF10
		KDM4C
		ERBB3
		AC010210.1
		PLAG1
		NAT16
		AL355075.2
		FADS3
		ZNF841
		TMEM198B
		AP003031.2
		AC025171.1
		GADD45GIP1
		NR5A2
		MAGEA6
		ZNF256
		AC105749.1
		LINC00449
		EXD3
		HNF4A
		USH1G
		LINC00957
		XBP1
		AKR7A2P1
		BPHL
		SUPT20H
		ACBD4
		BSCL2
		ANKRD12
		LIN37
		SOCS2
		C11orf24
		AC009812.3
		C2orf70
		DNAJB5
		HLA-DMA
		AC007998.5
		AC110609.1
		KIF28P
		TCF7L2
		MMP25
		CHST5
		HIPK2
		CDC34
		AC040896.1
		CASC1
		PLEKHA4
		AC010186.2
		AC139495.1
		AC009229.2
		GPR156
		EXOC3L1
		BOLA1
		CYP4F26P
		AC104109.2
		DCTN2
		AL590762.2
		Z97353.1
		YTHDC1
		AC008080.4
		AGMAT
		TNFSF14
		CRISPLD2
		RBM43
		SESN2
		PLXDC1
		FGD6
		C2orf16
		CALML6
		MTCYBP32
		DAPK1
		AC007405.1
		GPAT3
		C1orf146
		GLS2
		AC011816.2
		TINCR
		KCTD1
		WDR63
		SPEF2
		AC010761.3
		HIST1H2BF
		AC133785.1
		AC092747.2
		AC099521.1
		RPL18P10
		AC009950.1
		AC025031.5
		OR2B6
		C1RL
		B9D1
		C15orf48
		IGF2BP3
		RNU6-339P
		ZNF131
		TMCC3
		SPECC1L
		KLHL2P1
		DDB2
		SPTSSA
		MTRNR2L4
		AC040169.3
		AL590705.1
		BHMT
		AC107294.1
		MSH6
		GOLGA6L10
		AC098614.1
		FRMD5
		AC091173.1
		KBTBD3
		TICAM2
		ORAI3
		RNU2-22P
		CDH15
		U62317.2
		WDR19
		CPEB1
		RASSF5
		HES7
		RPL32
		BBS1
		AC023043.4
		PLD1
		VTCN1
		AC009948.3
		VSIG8
		FXN
		AC008731.1
		DPH6-AS1
		GDF9
		AL023775.1
		MTND1P8
		AC010285.1
		AL133353.1
		REXO5
		TM4SF20
		ANO9
		LINC00629
		LRRC56
		AC093274.1
		LINC00887
		AC027544.1
		FUOM
		CFHR1
		AL627171.2
		AL357033.1
		ITGA6
		SMCO4
		AC130456.2
		SPSB2
		IRS2
		PTPN14
		MTCO3P39
		AL109811.2
		HCG27
		FCRLB
		SCARF2
		FZD10
		ABCA12
		PFN4
		FAM120AOS
		ARHGEF34P
		CLIC1
		PDK4
		AC110285.1
		EPCAM
		NR2F2
		ARHGEF5
		AC002470.1
		PSMD10P2
		CDH3
		NANOGP8
		AC132219.1
		RNU6-945P
		AP002761.3
		HMOX1
		AL049779.2
		URB1-AS1
		AL356512.1
		LRRC37A9P
		AC003002.3
		AC009093.6
		MAPK8IP1P2
		AC017104.5
		AC093484.2
		AL590096.1
		AC025594.3
		ADAM28
		LINC01694
		ST3GAL1P1
		SAPCD1
		AL139039.3
		NAPSA
		AL162411.1
		KRT20
		FNBP1P1
		ZNF213-AS1
		CD163L1
		TSPO2
		AC090515.2
		DHRS4L2
		RAB34
		AC231981.1
		MPV17
		COL16A1
		TMEM200B
		RBPMS-AS1
		GLIPR1L2
		ZNF396
		RPS10P5
		AC005387.2
		MIR580
		MB21D2
		DHRS4
		PRMT9
		BX088645.1
		SCO2
		ICA1
		ABHD11-AS1
		LINC01232
		LINC00467
		FAM66B
		AL157400.4
		AC083843.2
		LINC02166
		IFIH1
		LINC00634
		AC027117.1
		IL1B
		AC007114.1
		CDKL5
		VGF
		METTL27
		CWC15
		FAM57B
		AC135506.1
		TXN2
		PRELP
		ERRFI1
		COX7C
		PMP22
		SLC39A1
		AC002451.1
		LRAT
		MMP19
		BCL10
		EPHA10
		NALT1
		TECPR1
		C11orf70
		CYP1B1
		ART5
		BCDIN3D-AS1
		BEAN1
		AC009994.1
		CCDC24
		MYADM
		RPL39L
		NAT14
		AC006449.3
		MYO1B
		AC010168.2
		RASSF7
		C17orf67
		ZNF843
		FLVCR1
		ALOX5
		AC007388.1
		AL121990.1
		AC099667.1
		CRYM
		ZNF197
		AL359962.1
		APOL6
		AC068580.3
		EVI5L
		BTG1
		LINC00514
		SFR1
		HIST1H2AE
		VAMP1
		AC114550.1
		MIR320B2
		LINC01273
		AC135178.2
		ABCA1
		CLEC2B
		REST
		AC093382.1
		C2orf27A
		ETDC
		CGB5
		C1orf56
		DCLK1
		AC007319.1
		STIM1
		LINC01719
		MORN1
		METRN
		RN7SL689P
		RHOA
		LINC01572
		HCAR3
		NUDT18
		AC079148.1
		AC104986.2
		LITAF
		ZBTB43
		SLC34A1
		AC105760.2
		OR7E102P
		SLC27A1
		HADHAP2
		TAF1A-AS1
		AC012358.3
		LMBRD2
		ADRA1B
		NUDT6
		RGS7
		CCL20
		ADAL
		AC069257.1
		VPS37D
		AC004982.2
		TRIM69
		AP006621.3
		C12orf80
		CD46
		AC018638.1
		FAM86C1
		SNRPGP14
		AC008747.1
		CDKL2
		SCEL
		DCDC2
		SLC35E2B
		AIMP2
		AP3B2
		ARNTL
		PUS10
		RGS9BP
		ANKRD31
		AL662890.1
		ZBTB8A
		FAM86B2
		AL353150.1
		ANGPT1
		EPHA1
		HMGA2
		INTS3
		FAM227B
		AL162231.2
		DNAH10OS
		SEPT7-AS1
		AC244153.1
		AC138956.1
		AC022872.1
		DLG2
		SESN3
		AP002478.1
		RRP8
		RPL17P11
		MYH15
		AC005837.1
		LYRM9
		ATP1A2
		TG
		OPTN
		AC004069.1
		LAMB1
		NPEPPS
		C10orf91
		PPM1B
		AC027682.6
		AL442125.1
		DDIT3
		SPIRE1
		RDH12
		AC016708.1
		CD52
		GEMIN7
		VPREB3
		AC074117.2
		AC104561.3
		TMEM105
		AL022322.1
		H1FX
		ALG1L9P
		HOXA9
		AC087645.2
		C6orf136
		OR1F1
		ZC3H11A
		PPFIBP2
		AC099336.1
		SMTNL1
		AL451074.2
		LINC02449
		OSCP1
		AL121772.1
		MORN4
		AC008014.1
		PKDCC
		U73166.1
		STAC
		FBXO48
		TJP2
		AC011406.1
		SLC9A8
		PPP1R3C
		AC016999.1
		GATA6-AS1
		SMARCA2
		CABLES1
		F11R
		ACTA2
		GPT2
		AL512274.1
		SNRNP27
		NME3
		METTL3
		SLC14A1
		AC010207.1
		AC233266.2
		LINC01238
		USH1C
		MDH1B
		C2orf74
		PGPEP1
		TRIM8
		TP63
		Z84485.1
		LINC01124
		ST18
		FRMD4B
		PSMB9
		C3orf67
		DHRS2
		SNRPD2
#2UpPC9GR	8900	PNCK
		CLMP
		FSTL1
		ELMO2
		CREB3L1
		RPS11
		MMP2
		SLMAP
		AC005000.1
		TMEM216
		FAM219A
		LRRC37A5P
		SMARCD3
		ZHX3
		APBB2
		BBOX1
		KLHL13
		XDH
		AC005865.1
		CD99P1
		NAPRT
		KCNG1
		PTPRR
		RPS18
		SLC10A7
		BRIX1
		TMSB10
		ESYT1
		AL645608.7
		CHD8
		AC009268.2
		SUMO1
		GP1BA
		BOLA3-AS1
		TPI1P1
		STYK1
		CHRNA10
		CCNI
		ITGB1P1
		XAB2
		NIFK-AS1
		HIC2
		AC016394.1
		TRIM74
		AK4P4
		CDK14
		PRKAG2-AS1
		TMEM42
		LINC01731
		DIRAS1
		AC008946.1
		AC132872.4
		CHD9
		ARID3C
		SEMA4D
		ST13P5
		INIP
		AC019118.2
		SFTA2
		AC068790.6
		OSBPL8
		FER1L5
		LONP1
		EVC
		TMEM254-AS1
		AL354794.2
		NAT10
		AL512638.1
		HEIH
		DHRS11
		AC004453.1
		LHB
		TAOK3
		STK25
		SLC12A4
		TMC3-AS1
		AL355974.1
		AC073529.1
		LSM12P1
		SNORA80D
		AC005052.1
		LINC00460
		USP6NL
		BAZ1B
		MTND3P25
		ABCD4
		AC123768.3
		AC131009.2
		LARP7
		FAAHP1
		PHF20
		COL1A1
		TMEM52
		AL109809.1
		RAB33B
		TMEM266
		CA11
		AC106017.1
		NUDT1
		ACBD3
		GDPD5
		FOXP3
		SH3TC2-DT
		SELL
		CIAO1
		LGI2
		RNF223
		CAVIN3
		ANKRD6
		WDR45
		LTBP4
		CIDECP
		AC092171.2
		SIRT6
		U51244.1
		CNPY4
		NAT8L
		CTDSP2
		DUSP4
		EXOSC7
		ROR2
		ZBTB48
		TRAV18
		BUD31
		MAOA
		FAM174A
		AC091185.1
		AC004837.2
		FBXO11
		PSMG4
		AP4B1-AS1
		RNA5SP122
		C6orf15
		CDK8
		ALG2
		AL358473.1
		KCNIP2-AS1
		AC243964.2
		TPM3
		EIF1
		AP001619.1
		NTHL1
		AC024451.4
		RPS28
		RASA4B
		RPL18AP3
		GPN2
		COQ9
		AL096828.3
		AC005592.1
		AC040918.1
		PMM1
		AC015987.1
		CBLL1
		AC133644.2
		VAX2
		SETDB1
		NFE4
		CPEB3
		INTS1
		CAMTA1
		LINC02341
		GMPPA
		PTP4A2
		IL24
		AL157400.2
		MLF1
		SEC14L1
		AC100830.1
		THADA
		NDUFS4
		PDZD3
		FAXC
		STPG1
		COX8A
		SMIM27
		SF3B6
		AL021707.3
		C9orf16
		AC015712.1
		NIPSNAP3B
		CLCN4
		ACAP2-IT1
		C11orf72
		PWP2
		NPR1
		DNAH11
		MTMR14
		USP42
		IPP
		UQCRC1
		AC108488.1
		ADAM23
		GTF2IP20
		POLG
		RICTOR
		RUNDC3A-AS1
		RAG1
		AL021937.3
		PTPN5
		POMT1
		AC026412.3
		OGFOD2
		ARSH
		DDHD2
		UPF3A
		NCF4-AS1
		USP46-AS1
		AL139041.1
		ZNF687
		DNAH17-AS1
		AL353803.5
		METTL21A
		AC020915.3
		SARS
		LINC01298
		CACNB1
		SETMAR
		MAN2B1
		OFD1
		AHCYL2
		AL928654.4
		RN7SL809P
		AL590867.2
		AC011487.1
		AC138392.1
		PEX16
		KDM4B
		GNG12
		HABP4
		CNTN2
		AP002954.1
		DUTP6
		AC004980.1
		LINC01765
		UBN2
		FUT4
		DBH
		HIST1H2BJ
		RN7SKP17
		AC106820.3
		RP9
		LINC01450
		UQCRHL
		AC087783.2
		MRM3
		AC007285.1
		AC106795.3
		DCUN1D5
		LTBR
		TDRKH
		GNB4
		ANKLE2
		NBPF3
		SLC39A5
		DNHD1
		AL391422.1
		ZNF350
		GIPR
		GFI1
		FHL1
		SMC6
		RTN4RL1
		OSGEP
		RPL4
		DLEC1
		E4F1
		AL139396.1
		PXN-AS1
		RPS21
		XCR1
		ARID5A
		RBM6
		CYSTM1
		AC138696.2
		WAPL
		IGSF8
		FOXCUT
		MAGEB6
		LINC00475
		ACAD11
		IFITM10
		AC092803.2
		C16orf71
		SCHIP1
		HDAC3
		BTK
		TMEM97P1
		AC004803.1
		AC068025.1
		PIGL
		MOB1B
		MRPL57
		OLFML2A
		DNAJC30
		UIMC1
		ZCCHC12
		ATP7B
		PRSS46P
		POLD2
		PPM1H
		PLSCR4
		HIST1H4I
		LGALS7B
		AL022324.1
		PDAP1
		ZNF146
		POLRMT
		GSTM2P1
		AL133216.2
		KLHL6
		LINC01607
		EIF4E2
		NENF
		AC007686.1
		AKIRIN1
		PDGFRB
		IL17D
		VRK2
		RDX
		CHRNB1
		EHBP1L1
		DCTN1
		TMEM241
		C1QBP
		TMEM248
		AC008105.2
		SEMA3G
		GRHL1
		AC108058.1
		NDUFAF8
		R3HDM2
		SLC2A10
		TRIM45
		CCDC188
		PAQR3
		OSER1
		AC147067.1
		CMA1
		CENPL
		MTRNR2L8
		AC024293.1
		ARHGEF26
		PAWR
		AC006213.3
		TIGD2
		ASTN2
		AP003084.1
		AC011815.1
		LINC01629
		COQ10A
		FAM161A
		TANC2
		ZMYM5
		PGM1
		ZNF586
		POLR3G
		LINC01301
		DCT
		RPS19P3
		RF00072
		AL049543.1
		RCAN1
		PELI3
		PROSER3
		LIMD2
		NTN4
		PECR
		WFIKKN1
		SYDE2
		DDN-AS1
		CD177
		JAK2
		PHC1P1
		SIRPG
		ZNF264
		ARMC10P1
		MYCL
		SNRPFP1
		ICA1L
		VN1R42P
		CASC10
		AQP11
		KALRN
		AC018926.3
		AC009163.5
		RNA5SP323
		LAMTOR5
		C5orf56
		GLIPR2
		OR7E1P
		FAM49A
		EHD2
		AL138781.1
		UBE2Q2P2
		SNRPGP10
		ZNF614
		PARD6G
		NUP133
		MIR221
		AC007663.3
		XXYLT1
		GRPEL2
		INPP5B
		SNTA1
		TRIM56
		GCM1
		UBE2J1
		TCFL5
		AL139035.1
		LINC00868
		TPI1P2
		LINC01907
		AC022079.1
		NCK2
		OXA1L
		FMO9P
		DNAJC25
		MIR4783
		AC119044.1
		E2F4
		HSCB
		AC126696.1
		MEX3D
		NPIPP1
		TAF1D
		AC093616.1
		SRGAP2C
		DVL1
		FBXO3
		GPR157
		AL158825.2
		CTAGE4
		AC079779.2
		AC007728.2
		ZFAS1
		NOL4L
		BTBD10
		BAIAP3
		PTP4A3
		CALCOCO2
		CDK16
		GEMIN6
		HRAS
		LINC-PINT
		JAGN1
		ARSK
		RBP7
		DSC1
		HOTAIRM1
		FAM45BP
		AL121658.1
		SPATA32
		LEMD1-AS1
		WSB1
		PPIAP59
		SRRD
		NYAP1
		LINC00896
		ZBTB41
		AC005776.2
		MME
		VAT1
		PCNX2
		CCDC14
		TUFM
		THEG
		WDR26
		KRT34
		AL139289.1
		SGSM3
		NR4A3
		PIH1D3
		SOCS3
		GAS1RR
		ZNF839
		SOX15
		CCNA2
		AGAP12P
		RUVBL2
		WNT10B
		AL390729.1
		PEAK3
		FALEC
		RPAP1
		RPL27
		NLRP9
		MT-ND6
		EPN1
		LINC00908
		WDPCP
		PJVK
		GAL
		SLC30A2
		TSTD1
		AUH
		SLC25A39
		KIF1B
		AMOTL2
		ABHD14B
		C4BPAP1
		PSRC1
		FARS2
		AMPD3
		NPHP3
		GLTPD2
		FBXO7
		AC044810.2
		NEURL1-AS1
		LRRFIP1
		RN7SL7P
		FKTN
		AC082651.3
		CRTAP
		STYXL1
		TK2
		RP5-1125A11.7
		AC074117.1
		DMAC2
		A1BG-AS1
		AC127070.1
		AP001781.1
		PRELID2
		STK39
		CCZ1B
		MMP24
		CKS2
		AC099489.3
		AC068620.1
		SETP20
		SLC25A24
		MRPL22
		GADD45B
[truncated: 14,017 more rows]

## Sheet: F_logFPKM_DownPC9UpMLN
gene_name	log (fpkm)_MLN	log (fpkm)_PC9GR
PXYLP1	2.63819	0.0285441
AC005674.2	1.94166	-0.239824
AC126755.2	2.39787	-0.767797
AL691482.3	2.1189	-0.394812
GTPBP1	2.77664	1.10767
ZNF83	0.650515	0.0950872
DCAF4L1	1.61776	-0.814289
CFAP157	1.9963	-0.274564
CHST15	2.98887	0.854364
TRAPPC9	2.82595	0.460923
PLXNA1	3.28646	0.956932
AC112487.1	0	0.0574451
SNAPC1	2.91568	0.498403
TTLL4	2.93062	0.63115
SLC9A3R1	2.43543	1.3776
UBE2W	3.086	0.320453
LPIN3	2.51772	0.178358
AL023284.4	1.29664	0.0712646
LDLR	3.00373	1.08467
GPATCH8	3.20598	0.796872
HSPA2	3.30919	0.254623
TACR2	0.80103	-0.609132
PLAC8L1	1.17512	-0.677469
SDR39U1	1.69083	-0.598961
PIGT	3.03198	0.896795
ALAS1	2.98592	1.4877
FOXO1	2.32735	0.443836
CFAP20	2.86007	1.19167
CBX2	3.00833	0.866989
AL512506.1	1.23045	-0.704155
AC092828.1	2.25984	-1.68324
GBA2	3.03449	0.773662
C4B	0.951545	-1.19243
DNAJB13	0.690106	-0.682066
AL365295.1	0.889076	-0.666971
ALDH1L1	0.874094	-0.42083
MAN1A1	0.840621	0.88066
SIGLEC15	0.90309	-1.25759
CKMT1B	1.23638	-1.3745
Z83851.1	1.39479	-0.496619
DCAF4	2.45296	0.506696
TACC1	3.31716	0.854236
ZDHHC3	2.95154	1.1478
PRKD2	2.63169	1.02381
AC019205.1	2.10712	-0.740382
KCNG3	2.09881	-0.256567
SKI	2.61381	0.882161
FAM156A	2.67348	-0.802409
CALCR	-0.261439	-1.13383
FP565260.6	2.51228	-1.38507
NUDT16L1	2.33308	0.912822
KLHL31	1.86242	-1.04957
BACH1-IT2	1.27633	-1.26318
DAGLA	2.20139	0.137755
KIZ	2.55264	0.0272276
TBC1D15	2.83567	0.612292
SRM	2.53855	0.989317
AC063944.2	0.539591	-1.05535
KDM2B	2.85781	0.243636
PDCL3P5	1.73798	-1.11113
MBOAT7	3.13828	2.33499
ERICH1	2.52329	0.177555
GSE1	2.77	0.965745
UCP3	2.02201	-0.554552
VAMP7	2.98841	1.49291
BBIP1	2.80888	-0.0467204
DENND6B	1.70715	-0.0332775
GALNS	2.7392	0.666964
AC134878.2	0.874094	-1.02135
AL645608.8	1.43926	-0.570757
RNASEH2B-AS1	0.840621	-1.34184
AP001284.1	1.43869	-0.842017
GPR75	2.13335	-0.205438
NCLN	3.2507	1.24202
AC003991.1	0.0395906	-1.2442
COLQ	1.23417	-1.45483
IGFL1	0.874094	-0.555793
FZR1	2.8687	0.873997
AC048341.1	2.51731	-0.817978
CCDC12	2.49093	0.405769
AC006059.1	0.127636	-0.581142
SMAD3	3.79455	1.17475
NEDD4	3.83351	0.79764
ATP6V0B	2.85585	1.31279
CMTM1	0.821726	-0.0880247
ZC3H3	2.46495	1.00537
NKRF	2.90311	0.821277
DUSP2	0.0395906	0.0267909
HACE1	2.65687	-0.00203995
SCD5	2.5169	0.83055
DMPK	2.68072	0.753597
AGAP1-IT1	1.43107	-0.597643
PRH1	1.77676	-0.886823
LTBP2	2.85654	1.14678
MANSC4	0.588046	0.161631
TLNRD1	2.76752	0.517393
AC122688.3	1.9388	-0.00118694
AC136475.3	-0.0228787	0.46001
SULT1A1	1.92477	0.681834
AC027228.2	2.82373	-0.63893
TTC5	2.90295	0.31862
PRR5-ARHGAP8	1.40512	-0.707649
AC068594.1	1.43869	-0.517857
NFKBID	2.15984	0.0318461
AP002884.1	1.05697	-0.932642
MRPL35	3.19177	0.872803
AC084782.2	1.07767	-1.17636
MCAM	2.19334	0.316478
RDH16	0.738561	-0.395509
ZBTB11-AS1	2.35083	-0.163923
GRAMD4	2.61602	0.812075
KAT2A	2.9126	0.834313
SLITRK6	1.41942	0.214155
MIEF1	3.16494	0.966117
FBXL19	2.83778	0.933754
CAMK2G	3.06485	1.38455
MVB12B	2.53587	0.170676
DNAH2	0.650515	-0.0907422
FAAP20	2.07187	0.235644
KCTD20	3.09115	1.05197
AC010422.6	0.389076	-1.37884
MST1R	2.13644	0.91597
AC067930.6	2.4045	-1.21223
EPPK1	2.23345	0.479668
RHPN1	2.47597	0.847718
TMEM150C	1.90977	-0.948229
AL355802.1	2.48973	-0.77964
LINC00624	2.20932	-0.957792
SAP130	2.63618	1.10316
RN7SKP23	1.67474	-1.52644
CAPZA1	3.39506	1.82456
B3GALNT1	0.0395906	-0.206747
FAM136A	3.3755	1.09877
ZBTB1	3.05852	0.769574
ZNF876P	-0.0228787	-0.54018
AC004477.3	1.43344	-0.541062
CYCSP10	1.47323	0.0724606
PUS7	3.43025	0.662324
AL133406.2	1.3085	-0.382274
LINC01137	2.50941	0.543563
PCDHB10	0.650515	-1.76979
DIAPH1	3.41232	1.52582
IQSEC1	2.7039	0.845757
COQ8A	2.76635	0.780451
AC083964.1	1.19635	-0.559563
MRPL49	2.8668	1.51892
CASZ1	1.74251	0.019747
LGALS9C	0.0395906	-1.51123
MIR600HG	2.39906	0.0826152
NPIPB13	2.06861	-1.04638
TMEM201	2.72435	0.314886
C7orf43	2.32581	0.615336
DISP2	1.21728	-1.2277
C1orf226	1.31774	0.593186
CBLN3	1.34949	-0.0949964
MPP3	2.98506	0.347793
ARHGEF6	0.723579	-1.50066
ACMSD	1.20327	-1.23735
ZNF575	1.52921	-0.310226
AC145423.3	1.34197	-0.261156
RNU6-850P	1.05697	-0.106393
AC013268.3	0.497818	-0.154015
PPP1R14C	1.77597	1.02143
KCTD12	2.27251	-1.27266
TNFSF9	2.11695	0.479501
ALS2CR12	1.08805	-1.181
PAM16	2.45863	0.0911668
SDCBP2	1.22045	0.0157432
AC008079.2	1.95176	-1.35384
RND1	2.48835	-0.358705
PHTF2	3.08504	0.979267
PRKCQ-AS1	2.05183	-0.344717
MIR4458HG	1.87409	0.130395
AC135178.5	1.46214	-0.679882
SLC25A43	3.01437	1.28217
UBE2J2	2.59438	0.837525
AP000808.1	1.05697	-1.23073
TMEM139	1.35122	0.988473
PPP1R13B	2.45558	0.262443
BACH1-IT1	1.44465	-0.807212
ASPRV1	1	-0.726766
PALLD	3.3685	0.944751
AL162311.3	0.889076	-0.990569
BCLAF1	3.63267	1.22091
AC245041.1	2.92861	1.52944
MIR3176	0.477121	0.577223
BRWD1-AS1	0.539591	-0.891387
AC091057.3	2.1568	-0.23394
ZNF331	2.63978	0.225743
AC087294.1	2.04139	-1.17477
SUV39H2	2.90407	0.404495
AL031985.3	1.5043	-0.341681
CST3	3.02424	1.12904
SLC35A5	2.95747	0.900116
GLA	3.41539	1.18531
SMG1P2	2.87955	-0.172396
SMPD2	2.37527	0.526992
ALPP	0.5	1.76773
RALGPS1	2.35044	0.436283
MFSD4A	1.67973	-0.176991
ZNF107	2.76836	-0.0625274
CMYA5	1.50494	-0.814449
C1orf198	2.96143	1.16762
EDAR	1.41465	-1.73957
CREBBP	3.11664	0.62596
AC109454.2	1.37058	-0.767912
SH3BGRL2	2.02109	1.01758
LINC02331	1.41368	0.411211
REXO1	2.44702	0.584411
SYT7	1.38689	0.771545
ZNF790	0.539591	-0.346027
THEM4	2.69494	0.364281
SLC19A1	2.67941	0.173343
LIMS1	3.29048	0.808047
DCUN1D2	2.5156	0.714402
AL358115.1	1.86994	-1.03007
AC027237.3	1.60835	-1.0302
TEPSIN	2.46259	0.157848
BNC1	0.690106	-1.1693
SLC25A40	2.75018	0.968712
FOXD2	1.71808	-0.00124924
MDGA1	2.84304	-0.370386
AL136531.2	0.690106	-1.13151
UBASH3B	3.54059	0.917066
SEC16A	3.47037	0.967405
ANGPTL4	2.23565	-0.636256
SBF1	3.11139	1.01851
HOXB4	1.22742	-1.36737
KDF1	0.778151	0.922973
IKBKB	2.98676	0.414902
MYEOV	2.82575	1.16479
AL022328.2	1.42867	-0.227391
ZNF142	2.86294	0.370506
MARK2	2.71521	1.30972
AC092368.3	1.64165	0.819706
HRASLS2	0.0880456	0.472129
LIPG	0.80103	-0.0452312
AL021407.1	0.389076	-0.246466
MAPK8	2.92033	0.664021
KCNJ12	1.36132	-0.467556
ZFYVE28	1.82496	0.163416
MRPS16	3.03501	1.5508
KBTBD4	2.73987	0.101333
RNU6-1016P	1.20749	0.0923572
MIR25	1.21728	0.898228
AC073127.1	-0.110924	-0.297919
PLIN5	0.451545	-0.48592
HKR1	2.82738	0.0220897
GJC2	0.889076	-0.381878
TM4SF1	4.03339	1.19945
SMG7	2.8457	1.26115
CTNND1	3.61754	1.73551
AC114495.2	1.42379	-0.692391
AC132192.2	1.89493	-0.751745
IMPDH1	3.11452	1.51819
ZNF620	2.2807	-0.0481259
POM121B	0.534093	-0.552636
GABBR2	0.573064	-0.200568
AC008760.2	0.451545	-0.966751
KCNIP2	1.525	-0.285067
AC133550.2	1.03959	-0.528124
PAGR1	2.8904	0.0106406
POLD3	3.13498	0.9911
BEND3	2.51695	-0.0873385
POU2F1	3.27509	0.362461
CNNM2	3.20629	0.00187436
PSCA	1.16111	1.42708
TTLL5	3.06158	0.402167
SPTSSB	0.389076	-0.905907
KDSR	2.91211	0.425372
FAM222A	1.84691	-0.268078
HNRNPA1	3.53664	2.4346
ZC3H12B	2.22045	0.0768624
LINC00526	0.909772	-1.22457
AMER1	2.71941	0.823738
SPHK2	2.35552	-0.207832
BICDL2	0.997818	1.13878
RBP5	1.71439	0.262951
E2F8	2.67377	0.93757
OTUD1	2.10123	0.95789
JPT1	3.60366	1.20253
TC2N	2.10684	0.785894
MATR3	3.69235	-0.969687
RBFOX3	2.18049	-1.66958
PROZ	1.18461	-0.236497
HNRNPA1P16	1.94727	-0.0806798
SAMD12	1.12764	0.402106
AP002761.4	2.41839	0.827836
CALML4	2.25828	-1.46248
AC007382.1	2.14428	0.305482
ST3GAL1	2.80137	1.16199
TEKT4P2	1.94257	0.971881
AC012074.1	1.09656	-0.991267
SRPRA	2.87899	1.31406
UBQLN4	3.04284	1.25571
PAK6	0.906457	0.0977465
TAS1R3	1.85775	-0.142499
CLPTM1	3.25477	1.38994
ALG1L	1.01671	-0.202462
AGPAT3	2.94209	0.897969
AC016526.2	0.16111	-0.667569
E2F1	2.95822	0.982636
RRP9	2.83488	0.980347
LINC00857	2.26317	0.890071
TMEM171	1.24286	-0.0612203
AASDHPPT	3.20017	0.498378
FAM110A	2.0138	1.05573
THTPA	2.40361	-0.235373
CSK	2.72138	0.913537
FURIN	2.94476	1.65791
RHBDD2	2.63087	1.53985
RAB33A	0.0395906	-0.270851
ALDH1B1	3.40252	0.679691
LRRN4	1.34949	-1.08995
AP5M1	3.21779	0.334646
C1orf159	2.39861	0.445134
CSNK1D	2.96166	0.998091
FAM118A	2.47342	0.519053
AL133215.2	1.72628	-0.503329
JCAD	2.63699	0.883016
TWNK	2.93968	0.829105
FOXD2-AS1	1.57461	-0.408449
CCNC	3.27857	1.13739
CHKA	2.98744	1.29653
ANKRD9	2.74903	0.949316
AC114489.1	0.127636	-0.182526
SPATS2	3.13847	0.923678
NOS2P3	-0.0228787	-1.71371
TAF6L	2.45447	0.40316
AC018638.2	1.44605	1.03183
SAP30L-AS1	2.22157	-0.436018
AC022400.2	1.64932	-0.77169
JAG2	2.74528	0.448926
SLCO4A1	2.39655	0.596171
TBC1D4	2.97135	0.652287
CCDC84	2.88878	0.382108
AC005546.1	1.25257	-0.511439
GPR37	1.61726	-0.396121
RN7SL81P	1.48886	-0.277206
AC116407.4	1.62313	-1.17797
P2RY6	2.1722	0.194049
NLRC5	2.09922	-0.0604427
AL596223.1	1.36008	0.364804
RAB3B	3.45263	0.208117
TNFSF13B	0.811625	-0.643742
AL096865.1	0.5	-1.11933
SLC16A3	2.62268	0.881771
RANBP17	2.92636	-0.0300944
AL359715.3	1.21568	-0.54793
SNX3	3.04644	1.78369
NECAB3	2.49326	0.916868
MGAT4A	2.50934	0.788423
TSC22D4	2.26806	1.27323
AL031708.1	2.07691	-1.54532
VN1R1	1.05697	-0.422378
SRSF2	3.34241	1.48862
CCDC88C	2.78042	-0.0473814
AC092683.1	2.27764	-1.08685
SRGAP3	1.7851	-0.492735
C8orf76	2.64253	-0.537359
GMNN	2.95561	1.04099
TIMM21	2.76633	0.392815
CEP152	3.19643	0.0648029
AL031775.2	1.44325	-0.140597
PRDM15	2.67485	-0.00199443
GSK3A	3.0296	0.952453
AC132008.2	2.53462	1.01123
KCNK5	2.28098	0.69915
DNER	1.25257	-0.651413
TTC9	2.08366	0.611907
AC025627.1	1.63777	-0.814889
ZBTB49	2.00879	0.0941592
FAM160A1	1.1722	0.0541102
CCDC115	2.60778	0.890548
TUBB1	1.81557	-0.853711
TOP1	3.05519	1.50756
AL157937.1	2.04277	-0.238242
CHORDC1	3.56826	0.589645
NUTM2B	1.94347	-1.95846
MMS22L	3.44397	0.0472242
LY6K	1.2007	0.0496429
UFSP1	1.85921	-0.225673
CYP2D6	1.36132	-0.321285
GRPEL1	3.12795	0.965206
CAPN10-AS1	2.12386	-0.150116
C1orf61	1.95424	-0.206697
C16orf45	2.66368	-0.565913
DNAH17	1.97866	-0.562853
NCOR2	3.29535	1.24603
TONSL	3.04547	0.559849
TNXB	1.18086	0.512011
TACR1	1.78162	-1.48515
SNX25	2.82177	0.443693
HEPHL1	0.991136	-1.03809
PCSK6	2.59818	0.10332
MYO16-AS1	-0.110924	0.381684
PTPRH	1.82183	0.904624
AL049870.3	-0.0228787	-0.708555
MILR1	1.07306	0.536132
CYCSP34	0.866197	-0.0688027
SCAMP3	2.90928	1.39964
AC009090.4	2.02266	-0.98697
LINC00313	0.127636	-1.06382
AP003392.1	2.01851	-0.123075
FBXO46	2.64134	0.957733
ATP2B2	0.0395906	-2.15936
HPS1	2.6535	0.931144
LYPD8	0.0880456	-0.263697
SH2B1	2.78658	0.87282
AADACP1	2.68062	0.0754123
AL050343.1	1.43017	-0.188562
AC100803.2	1.33232	-0.820152
GCH1	2.27129	0.478401
PODXL	3.07092	1.02804
AC005162.3	0.389076	-1.38379
LIPT1	2.00557	0.314909
SLC37A1	2.2188	0.578623
LIN7B	1.78943	0.237399
E2F7	2.96941	-0.0250129
VPS37B	2.52297	0.768344
ADAMTS17	0.772034	-0.634146
TRPV1	2.53013	0.0613504
QSOX2	3.1472	0.926941
SLC39A4	2.19126	0.782322
KMT2D	3.2995	0.791063
PPP5C	3.10109	0.890727
SCAMP4	2.57008	1.01097
RN7SL192P	0.977121	-0.52758
HIC1	2.33242	-1.4837
EEF1D	3.66005	0.980916
AC027288.3	1.0207	-1.24563
MELTF	2.91773	0.812287
LRRTM2	2.3462	-1.11743
ATP6V0C	2.24828	-0.693401
RPRD1A	3.29832	0.78547
EIF4ENIF1	2.58353	0.281778
AC004980.2	1.49826	-0.0522202
HPDL	1.7312	0.662557
AP000941.1	1.40977	-1.0769
RNU6-481P	-0.261439	-0.181636
DOCK9-AS2	1.07306	-0.667096
RSL24D1P6	0.715682	-0.422064
AC022596.2	1.02461	-1.34883
SLC35C1	2.6401	0.727055
SHPK	2.88947	-0.50373
BEND3P3	2.24763	-1.04727
NBL1	2.75474	-0.491269
LINC00184	0.0880456	-1.14855
ZNF252P-AS1	1.57963	-1.06248
PTOV1-AS2	2.02845	0.132539
FAXDC2	2.13108	-0.102372
PRRT3-AS1	1.70327	-0.16227
HDAC10	2.02207	-1.51361
RNMT	2.96826	0.758716
ZDHHC20-IT1	-0.261439	-0.636665
PIGU	2.69093	0.995762
CNNM3	2.58311	0.677907
GRAMD2B	1.10341	0.415699
ALMS1	3.44748	0.342393
AMPD2	2.89474	0.582892
GATA2-AS1	0.5	1.17826
AL022323.4	1.94931	-1.95211
AC091132.4	2.16212	-1.08832
AL590627.1	2.11839	-1.25952
MYBBP1A	3.58329	1.14389
PASK	2.93628	0.496422
AC121761.1	1.51831	-0.904677
COL12A1	2.67624	0.772068
AC073611.1	1.37097	-0.444389
ISCA2	2.48012	1.04493
HMGB1	3.43759	1.65179
AL161431.1	1.89167	1.27598
RPL7P28	1.22742	-1.02148
SOX7	1.24428	-0.581903
IQCK	2.3033	0.376996
PTPRE	1.26446	-0.0688132
ALKBH3-AS1	1.35506	-0.736937
JAM3	2.22608	-0.5281
PSG8	-0.110924	-1.50459
AC090922.1	0.451545	-0.85897
FAM13A-AS1	1.27327	-0.374262
SP6	1.81909	1.2874
ATP11A	2.84504	0.949562
LINC02019	0.811625	-1.18442
ZNF692	2.57415	0.879449
AP000648.3	3.1684	-0.000662
Z83851.2	1.5043	-0.738148
TRAF3	3.07731	1.00549
COX17	2.6421	1.12901
TCF12	3.40491	0.639019
PRKCD	1.72833	0.972944
NDUFB4	2.92953	1.85977
ANTXR2	1.66581	-0.0676719
RBM19	3.05355	0.498278
PPTC7	2.86255	0.819447
AL079301.1	1.10874	-1.2062
PROSER1	2.55116	1.03069
TBC1D2B	2.98374	0.578418
PLEKHG3	3.39987	0.399019
FRMD6	3.14989	0.715576
DGKZ	2.76038	0.928884
FKBP10	3.22478	1.35627
SDCBP2-AS1	2.18312	0.285722
MAN1C1	0.849485	-0.568791
FAM83E	1.30049	0.431602
CA5BP1	2.29506	0.11436
MATN3	2.05694	-0.911422
TBC1D20	3.03892	1.08811
AL109613.1	1.86923	-0.665026
GARNL3	2.38156	-0.427622
PPP1R16A	2.78095	0.643554
MYO18A	3.47097	0.801027
AL359715.1	0.826606	0.175925
USP45	2.86607	0.0951009
TNS1	2.30682	0.0335541
AL442663.3	1.11265	-1.15225
PFN1P8	1.47615	-0.987396
ARHGAP23	2.60475	0.781818
ADCY10	1.10476	-1.28187
FOXP4	2.23746	1.01578
CD37	1.58366	-0.0678485
SH3BP5L	2.87141	1.03825
TBC1D30	2.01703	-0.140649
HTT	3.21946	0.550362
AL445931.1	1.78771	-0.715469
HOXC9	1.93892	0.143263
AC073476.1	1.35122	-0.301776
TDG	2.96289	1.04214
OGFOD3	2.83386	0.527382
DCTPP1	2.89693	1.13932
CAMK2A	1.1165	-1.5227
SNORA66	1.19011	0.541414
AP001527.2	1.07918	-0.226918
PPM1L	2.06874	-0.679819
AKR1C8P	1.07306	-0.71786
AC006504.8	1.90686	0.214708
C2CD2	2.71721	0.436877
NKX1-2	-0.0228787	-0.586955
AL121906.2	1.38689	0.104256
DNASE1L2	1.90367	-0.609085
DOCK5	4.03169	0.769741
C19orf24	2.40953	0.779404
AC015909.5	2.12937	-1.50751
SHROOM2	1.38021	0.404395
AL021707.2	1.63823	-0.149846
PLB1	1.13592	-0.737666
AL662791.1	0.690106	-0.0382791
AC021106.3	1.07306	0.123806
URAHP	1.48284	-0.236336
ZNF341	1.87775	0.110675
PPP1R26-AS1	1.76304	0.178725
SCG5	1.28875	-1.49388
ATP6V1B1	1.38096	0.776072
DAAM1	2.73244	0.415528
MROH1	2.62509	0.726041
RNF44	2.45031	1.28572
AC012676.1	1.52596	-0.336043
STEAP3-AS1	2.18896	-1.60114
PTGIS	0.0395906	-0.439125
PKP4-AS1	1.98652	-1.48751
AC010536.2	1.16723	-0.0620583
PMPCA	3.11448	0.753442
ZNF785	1.58978	-0.0179776
SSC4D	1.49782	-0.354903
SLC4A8	1.73565	-0.866014
ZNF718	1.75346	-0.159935
CXADR	2.98203	0.388495
AL132656.2	1.92149	-0.331271
EPHX3	0.738561	0.867067
ALDH3A2	3.73779	1.31821
BOP1	3.31964	1.13393
P2RX5-TAX1BP3	2.37342	-0.9171
AL157791.2	1.24916	-0.83168
TMEM92	2.35421	0.245221
ACOT7	2.56591	1.05338
AC007040.2	1.76024	-1.58297
H3F3B	3.87096	1.63221
MT-TP	2.83768	3.43784
ARIH1	3.44366	0.4455
LINC01508	0.539591	0.333652
CPAMD8	-0.261439	0.734941
ZNF275	2.62844	0.450098
SULT1A2	1.69191	1.03458
SOWAHB	0.451545	0.328615
TIAF1	2.42149	-0.725068
FANCA	3.30578	0.0253639
ASAP1	3.48595	1.11775
BRCC3	2.84763	0.960636
AP4M1	2.59852	0.267485
AC080013.3	0.922549	-0.480504
BAG3	2.89107	1.57304
MVD	2.45074	0.981506
GCNT2	3.01164	0.488324
AC015802.4	0.943245	-0.807836
RITA1	2.66793	1.03535
DRP2	1.93622	-0.805092
SLC9A3R2	2.36504	0.835581
SMG1	3.90687	0.695962
PIP5K1C	2.35246	0.625798
LINC01978	1.36173	-1.10764
TSPAN14	3.4566	0.983798
AC159540.2	1.81085	-1.33794
SLC2A1	3.40286	1.59919
CD14	1.34332	-0.0955944
SOGA1	3.22773	0.467442
AC092681.1	1.21568	-0.515802
AC009996.1	1.41368	-0.967166
CRABP2	1.2007	2.06648
CCDC125	2.54218	0.330023
ISLR	1.61304	-0.868815
NARF	2.82277	0.622245
NRL	1.07767	-0.546543
ACSBG1	1.64029	-1.19324
AC004067.1	1.39479	-0.696321
EVI2B	2.03103	-1.46864
CTPS1	3.47397	0.965072
PLEKHG4B	1.6647	-1.68352
SULT1A3	2.28977	-0.824157
SAA1	0.778151	0.460598
RC3H2	3.51991	0.726263
PQLC1	2.45135	0.632441
GLI2	2.92209	-0.554938
PPP6C	3.13742	1.25939
PLEKHD1	0.588046	-1.16563
FNTA	3.12141	0.567152
ACACB	2.80004	-0.151918
RABGAP1L	2.94898	0.0720554
NMU	0.295532	-0.122289
SEMA4A	0.0880456	0.568136
TIMM23B	2.67609	0.1916
KPTN	2.02488	0.664233
ZNF503-AS2	1.47273	-0.232703
RNU6-1262P	0.922549	0.12486
RPL23AP24	0.389076	-0.0769561
TRIM16L	3.71315	1.69165
ADM5	2.28957	0.060409
AC009802.1	0.723579	-1.25847
SCAF4	2.55286	0.768796
AL390879.1	1.79703	0.163229
AC116407.2	1.02461	-0.668327
ARTN	0.840621	-0.257573
TMTC2	2.45627	-0.11725
AC124016.2	1.09376	-0.774387
TEX264	2.75491	0.607759
RTL8A	2.09856	1.46393
DHCR24	3.04574	2.0692
AL390198.1	0.409772	-0.138635
MPZL2	-0.0228787	0.847887
FASN	3.63896	1.90155
EDDM13	1.52383	-0.545488
CEP170B	2.95089	0.940375
AC087388.1	1.97251	-0.23885
SRRM1P3	1.89995	-1.47972
SPOPL	3.0562	0.700429
PACRGL	2.63044	0.390221
C9orf66	0.972241	-1.51699
AC131212.2	1.14502	-0.733121
DHX30	3.23967	0.880759
PLCH2	1.58805	-0.967174
PSPN	1.78387	-0.422744
PPP2R1B	3.22742	0.448692
TANC1	2.92459	0.326216
C15orf62	1.95491	-0.504272
ZNF527	2.44846	-0.722898
AGAP9	2.42898	0.587379
TAMM41	2.4178	0.316319
AC026495.1	0.80103	-1.24974
BZW1	3.82972	1.71754
SOS1-IT1	2.09552	-0.34974
CCDC86	2.90508	1.02931
AC010595.1	0.150515	-0.17664
CTRB2	0.0395906	-1.16285
TUBA3D	1.52461	-0.457628
RGCC	0.259257	-0.273701
SH3GLB2	2.91855	1.31684
AL136038.5	1.03409	-0.736722
ANO7	1.62276	-0.486503
AC010894.3	1.79419	-0.108797
TMEM184B	2.98978	1.42886
AC140134.1	2.01251	-0.505171
AGAP2	1.36008	-1.16442
DOT1L	2.79298	0.375529
COL13A1	0.539591	-0.683425
AC011442.1	0.997818	-0.424046
TRPM4	2.45119	0.804415
B3GAT2	2.08653	-1.49237
AC104938.1	0.539591	-1.2049
TMEM86B	1.71203	-0.034625
ARSI	2.7157	0.0334159
ZDHHC18	3.03906	0.92482
AC007038.2	1.92205	-0.0619769
CPSF1	3.11003	1.1027
RAI1	3.08239	0.977017
STARD10	2.08044	1.42221
ADORA1	1.26701	0.606101
EEF1E1	2.80003	0.263012
PARP10	1.33138	0.485082
AC016745.1	1.28644	-0.699076
AC073046.1	1.82369	-0.0502567
WBP2	2.75874	1.29115
TMEM144	2.50933	0.0841878
AC012676.5	1.88156	-0.104834
SLC46A1	3.0861	-0.217931
COX7A1	1.14502	-0.99581
AL590235.1	1.36132	-0.452892
KCNC4	1.65482	-0.109737
TMEM220	1.83373	-0.768395
CPTP	2.33091	1.202
AL359715.2	1.09376	-0.0935347
DNAJB12	3.01462	0.943048
CHERP	2.36806	0.833674
AC018690.1	1.74708	0.21899
AP000254.1	1.71982	-0.016155
RUSC1-AS1	2.45879	0.253045
AC008537.3	1.13004	-0.186038
ANKRD1	2.21188	0.35503
DDR1	2.8655	1.55085
ATP6V1D	3.05142	0.900256
PTGS1	1.2007	-0.125192
LRP2BP	2.0508	-0.791148
MEIOC	2.90352	-1.34804
RBFA	2.85097	-0.177958
C18orf54	2.46739	-0.101068
AL034346.1	0.922549	-0.506686
DENND2D	1.56757	0.626376
AC012615.6	1.73052	-0.517188
FXYD3	0.451545	1.73304
AL160006.1	2.16553	0.476506
FBXO10	2.4075	-0.416531
WDR66	1.66823	-1.07737
SLC25A5-AS1	1.8388	-0.346226
GCSH	2.61706	-0.227306
AL122035.2	2.31298	-0.905327
AC022762.2	1.51851	-0.32233
SOD2	3.15437	0.728994
CYTH1	2.90899	0.918542
NOSTRIN	2.32182	-1.13754
HERC2P2	3.39901	0.969521
FIBCD1	1.86255	0.655195
AC078909.2	0.451545	-0.619489
LRGUK	0.723579	-0.332124
PRDM2	2.57616	0.435069
SHROOM1	2.24644	0.378674
C2CD3	3.21146	0.598003
MMP15	2.58828	1.41138
NCDN	2.60654	0.838272
AL136418.1	1.3388	-1.14126
TMEM104	2.72301	0.321684
LRRC8A	3.12285	1.0832
ZBED1	2.89389	0.737161
ANKRD49	2.45507	0.50256
AC018553.1	0.80103	-0.00154482
EML3	2.56385	0.878554
AP000344.2	0.451545	-0.950903
COMMD5	2.67762	0.817857
HDHD2	2.61077	-0.717313
IGDCC3	-0.0228787	-1.30398
AC022400.5	1.9431	-0.146691
CAMSAP1	3.28851	0.247324
IGLJCOR18	0.5	0.0225617
AC132219.2	2.0154	-0.254685
AHRR	1.88616	-0.121956
ZDHHC11B	1.98	-1.37703
ZNF324	2.52918	0.635159
ENTPD7	2.91634	0.453392
AL606834.2	1.43926	-0.186977
TGFB2-AS1	1.44605	-0.638724
PFN1P2	2.03035	-0.50866
UCN2	2.05063	-0.597444
DPYSL4	2.31068	-0.318288
BICD1	2.85203	0.398395
RAB11FIP4	2.22311	0.447613
IQANK1	1.55897	0.816409
HOXA5	2.0225	0.525311
RTL8C	2.56342	1.43182
ZNF750	1.7242	0.351671
FAM122B	2.85156	1.36711
MAP3K6	2.3231	0.489914
PPP6R2	2.77972	1.01218
AC073264.3	0.389076	-0.946741
UNKL	2.94844	0.460798
RAVER1	2.43666	0.738107
PLA2G10	0.16111	-0.522109
TMEM134	2.01965	0.919713
ALDH5A1	2.43469	1.05218
FBRS	2.63184	1.12649
SPATA24	1.75162	0.510472
TBC1D24	2.85704	0.283778
PTPN23	2.47639	0.866045
DGCR8	3.02493	0.625381
BRI3BP	3.69154	0.706709
PLBD2	2.46013	1.01312
SLC12A7	2.88089	0.922494
FBXO34	2.98958	0.762305
PCDH12	1.80955	-0.781282
F2RL2	2.54247	-1.02075
TELO2	2.68915	0.809688
PNPLA3	1.3686	-0.160642
PCDHB14	0.778151	-1.29494
CSNK1E	3.02839	1.13485
AL136038.4	1.65819	-0.630872
ARL17B	2.25054	-0.18176
PAX6	1.50684	-0.839642
AC002553.1	1.79575	-0.273011
LRP8	3.45125	0.657092
AC012313.1	2.05645	0.788928
SCARA3	3.25757	0.342842
PPP1R36	-0.110924	-1.44195
HCFC2	2.57168	0.069296
PRDM10	2.66152	0.175209
SRGAP1	2.77327	0.0730458
RNU2-7P	0.451545	-0.503016
C15orf39	2.75803	0.886104
AC009041.4	1.48307	-0.697689
TARDBP	3.17362	1.06999
AC080112.3	1.98076	-1.44828
PLXNB2	3.26689	1.66382
NSFL1C	3.14707	1.19573
HEY1	1.14165	-0.305823
CANT1	3.1952	1.6283
CROCCP2	2.82312	0.553152
SLC7A7	2.76602	-0.361864
TMEM64	3.25856	-0.104944
PCDHGA11	0.991136	-0.550767
AC137936.2	1.52461	-0.879725
TOMM5	3.51229	-1.00372
SLC41A1	2.91286	1.1822
AL021154.1	-0.0228787	-0.176854
AC026401.3	2.24068	0.660404
TNRC6C-AS1	1.24708	0.144279
TCF20	3.30015	0.882457
FAM178B	-0.261439	-0.343889
CNIH1	3.40953	1.40356
MROH6	2.53147	1.18717
UST	2.29298	-1.13777
Z98257.1	-0.110924	0.904415
SNORA71C	1.79097	0.31336
FUT2	1.85379	-0.113873
AATBC	1.61084	-1.17347
IRF9	2.15043	-0.582659
MYO1D	2.24029	0.596651
AC008735.2	0.889076	0.550199
DIO3OS	1.46006	-1.45993
SMAD6	3.551	-0.238876
MEF2C	0.811625	-1.7301
ACTR3	3.84147	1.37955
ZNF485	2.01605	0.248839
HOXC13	1.79581	0.754108
SPATA5L1	2.50538	0.511571
NDST1	3.48029	1.18456
BCO2	1.49046	-0.840915
ACACA	3.61647	0.993531
ABCG1	1.42317	0.212039
MAGEE1	2.11471	0.177343
CTIF	2.56915	0.352567
ZNF154	2.01265	-0.872029
SLC35B2	2.70912	1.67246
AL080317.2	1.68938	-0.742631
CTSW	0.909772	-1.28719
SLC25A44	2.92093	0.802427
LRRC4	1.68274	-1.29813
CS	3.44905	1.622
ECE2	2.29768	0.165116
OVGP1	1.07918	0.147939
FADS2	3.45104	0.34557
THBD	2.46462	-1.21492
AC010326.3	0.866197	0.731532
ZC3H12A	2.91926	1.03433
PLEKHA3	3.08289	0.382261
AP000345.2	0.0395906	-0.453651
AC104115.2	1.30955	-0.771472
SCD	3.68312	2.5219
NT5DC3	3.11141	0.25919
N6AMT1	2.49758	0.0875408
HSPA1A	4.11409	1.41745
DAPK2	2.20257	-0.442276
U2AF1	2.7125	-0.327077
FUT8-AS1	1.1722	-0.479296
AL445187.1	0.690106	-0.567226
CREBZF	3.53063	1.1617
AC109460.2	1.80798	-0.164081
SKA1	2.77171	0.526199
AC007956.1	1.30533	-0.420272
AC068282.1	1.21244	-0.582367
ZCCHC14	2.83276	0.702747
AL157700.1	0.650515	-0.0293364
HOXC13-AS	0.627636	0.505487
DUSP8P5	1.50935	-0.182191
NCS1	3.27751	0.900185
NFIX	2.0121	0.609259
USP21	2.41504	0.925784
AC013451.2	1.55479	-0.256014
AC090948.1	1.29664	-0.632441
MIR429	-0.261439	0.822416
SLC20A1	3.47984	1.26419
AC116914.2	1.28875	0.167271
SOCS5P4	1.41368	-0.322105
LYNX1	1.82428	-0.213064
TMEM92-AS1	1.09235	-0.0578187
AC021945.1	1.80125	-1.02934
SLC29A2	2.25242	1.19743
NHSL1	2.33444	0.116862
AC009078.3	2.43276	-1.01158
AC005014.2	0.811625	-0.596346
AL031846.2	1.30103	-0.422398
SLC25A28	2.30252	0.880731
AL049780.3	1.60179	-0.933309
ZBTB44	3.1851	0.408999
SUMO4	1.41368	-1.18001
RGPD1	0.539591	-1.57085
PRSS36	0.928666	-0.706347
CFP	1.24286	-1.56842
TBCD	3.18157	0.760667
PANK4	2.57858	0.469458
RECQL4	3.05328	0.891167
DPAGT1	2.65774	0.860539
ZFP57	-0.0228787	-0.924075
RSPH9	2.26787	-0.784503
FJX1	2.78081	0.506134
CLCF1	2.71281	1.20671
AL391280.1	1.37097	-0.617963
SLC27A5	2.21069	0.0226794
CHKB-CPT1B	1.63615	-1.75279
AL138820.1	1.74812	-1.38456
CYP26A1	1.51851	-0.550198
GNAL	2.6807	-0.905489
TPRG1L	2.25175	1.29389
IMP4	3.13423	1.13486
CERK	3.17413	0.977956
IKBKGP1	2.1972	0.523955
MRPL38	2.75794	-0.876585
LRRN2	2.23248	0.605661
POLR3K	2.59487	0.65182
HSD11B2	1.21244	-0.104127
TMEM250	2.89603	1.22494
SCUBE3	2.40396	-1.14448
ZNF345	0.30103	-0.148182
TMEM63C	1.14502	-0.826311
FGF17	0.80103	-1.51001
RIN2	3.19587	0.737985
MFSD11	3.05816	0.333764
OTUD3	2.74463	0.234928
RWDD4	2.60179	0.743315
RGL1	1.86123	0.0274974
PALM2	0.723579	-1.61325
AC017074.1	1.11394	0.335067
INPP5J	1.21808	-0.0287892
CBFA2T2	2.49902	0.559208
AP000919.1	2.61861	-0.887651
SPDYE5	1.52383	-0.513205
PLA2G6	1.64029	0.0939538
MRPS28	2.83163	-0.0113969
SYTL4	2.28365	0.191036
BMP8A	1.53073	-0.658214
MFSD13B	1.74029	-1.0451
AC022400.1	0.650515	0.564339
UCA1	-0.261439	1.57512
HIF1A-AS2	1.39759	-0.227566
DHCR7	2.79627	1.51854
CFLAR-AS1	2.16728	-1.06378
FRMD4A	2.14457	-0.465432
WWOX	2.48045	0.038006
EBAG9P1	1.15482	-0.546656
AC020978.9	2.20522	-0.910529
FBXO25	2.86588	0.081551
AC093458.2	0.650515	-1.05125
DTX4	1.88469	1.05173
AC094019.1	1.04139	-0.826194
LRFN4	2.80537	0.721025
LDLRAP1	2.26804	0.869724
STIM2	2.67459	0.349152
ANKRD36C	3.24221	-0.520086
AL022326.1	0.60206	-0.942114
UBXN11	2.12276	0.841744
C19orf73	1.2297	-0.664098
SHB	2.99667	0.461356
ZNF573	2.27863	-1.23062
SLC43A2	2.45623	-0.0444019
ZNF616	1.3787	-0.232062
AC079414.3	1.68461	-0.0351973
SETD1B	2.59839	0.713988
SNRNP35	2.3544	0.395234
NRIP2	2.03326	-0.318321
RIC8B	2.76659	0.140492
KIAA1024	2.08582	-0.073222
LOX	2.05101	-0.255065
PALD1	2.65003	0.483266
FAM53B	2.89877	0.288621
USP36	3.17939	0.616922
PRKCH	2.30127	0.364299
WDR90	2.79417	0.565512
AC004975.1	1.21728	-0.311275
RBP3	0.690106	-0.738246
TIMM17B	2.76659	0.899873
AP000487.1	1.98284	-0.438036
SREBF1	3.2168	1.33299
AC004160.1	1.6292	-1.90507
AC005077.4	1.45585	0.0506901
FBXO28	3.26546	1.19012
RNF123	2.59007	0.536885
ZUFSP	2.629	0.894222
MUM1	2.90421	0.37908
SYT16	1.14613	-0.614906
AC103706.1	1.5153	-0.124958
TRMT61A	2.81987	0.941678
AL662907.2	1.24144	-1.12941
C1QTNF1	2.59938	0.515784
TRADD	2.43744	1.08199
DIO3	1.22818	-0.914471
MIR3677	0.738561	0.302586
RDH13	2.75783	0.487696
KLHDC4	2.91479	0.534186
AFAP1-AS1	2.33164	0.939711
DUSP7	2.48	0.263421
AC108002.1	1.44268	-1.05321
DLSTP1	2.22856	-0.49981
AC008764.2	1.41368	0.622944
AC084125.2	2.3062	-0.715542
TAF7L	0.690106	-0.938526
BDNF	2.92888	-1.38958
CYP2F2P	0.991136	-0.327069
EFHD1	1.07918	1.03951
AC018665.1	2.07319	0.0936402
AC011815.3	0.690106	-0.312424
AC005632.3	0	-0.741147
RAB26	2.34507	0.73064
TMEM165	3.08683	1.03175
PBRM1	3.16253	0.437878
SLC25A25-AS1	2.46841	-0.363903
SERINC2	2.10152	0.65992
SNAPC4	2.78133	0.512593
KRT87P	2.34439	0.0682939
HS6ST2	1.36296	0.930523
HSF4	2.04531	0.395123
SPEN	3.36146	0.578621
AL353804.1	1.74645	-0.388005
FRAT2	2.14903	0.866766
TULP4	2.90615	0.201518
ARAP3	2.35884	0.361643
LINC01123	0.971252	0.114723
DHRS3	3.14062	1.27532
AC092437.1	-0.110924	-1.01357
IL12A	1.3678	-0.583388
SSNA1	2.57054	1.36546
LRRC37A15P	1.85122	-0.12971
MX2	-0.0228787	-1.23431
AC008481.2	1.11394	-0.394961
HSP90AA1	4.61971	2.61258
PHLPP1	2.79091	0.15422
PHACTR4	2.89398	0.677916
BRD9	3.12463	0.751023
AC087163.2	1.42685	-0.765121
AC002076.1	0.5	-0.47269
NBEAL2	3.08033	0.889468
NPHP4	2.33057	0.108019
AL356801.1	1.46826	0.143486
ANKRD39	2.56736	-0.510391
AC127496.7	1.42037	-0.41175
FBXW5	3.11332	1.40007
AC091544.5	-0.522879	-0.0914761
GRIN1	1.22818	-0.124655
ZNF302	2.86877	0.695855
LIMCH1	3.7075	1.55923
HOOK2	2.25288	1.06606
GLUL	2.04627	1.1043
PRKD1	2.19875	-0.438051
RAPGEF3	1.39195	-0.220979
DDX3P1	1.09376	-1.1829
TGOLN2	3.77556	1.59767
BCAS1	1.72871	-0.940042
SORD	2.70553	0.748289
SLC25A33	2.24793	0.209748
TRRAP	3.52525	0.891209
SERHL2	1.8388	-0.193394
NPR2	2.366	-0.108585
CICP14	2.0517	0.55803
ARHGEF1	3.35324	0.990253
YLPM1	3.38999	1.03864
TCF3	2.89558	1.26339
AL121790.1	0.928666	-0.802571
AC069544.1	1.53242	-1.25216
AC124319.2	2.4547	-1.00071
HSPA1B	4.10939	1.30862
CCDC146	1.9609	0.207436
ZNF488	2.57129	0.677665
AC112220.2	1.55207	0.0943947
SF3B4	2.61706	1.80628
SEMA5A	-0.0228787	0.242535
IGFBP4	4.08955	0.0742165
AC137932.2	1.48377	-0.310172
SLC4A11	1.96537	1.01001
PGM3	3.21637	0.627923
IL10RB-AS1	1.95384	-1.60051
AL136084.2	0.0395906	-1.37143
ADGRA3	3.19056	0.377628
ZNF33A	3.05086	0.62129
SLC52A2	3.17959	1.26951
AMD1	3.62137	1.05636
Z82217.1	2.31924	-1.56164
AL591848.3	1.16111	-0.814262
LMBR1	3.27733	0.884668
AP000697.1	1.06029	-0.200066
GFOD2	2.94944	0.421966
COPS7A	2.85116	1.34834
RRP7A	3.32471	0.961393
SLC25A14	2.42482	0.757139
RELT	2.77974	0.0753753
KIAA1211L	1.03959	0.608853
SHBG	1.05019	-0.922482
TOR3A	3.03376	0.935102
PREP	2.79722	0.942284
CSNK1A1P1	1.87839	-1.413
SERPINE3	0.690106	-0.843196
AC022154.1	1.33835	-1.17576
AP002807.1	2.15893	-0.265184
CHST11	3.12732	0.972916
RNF39	1.38021	0.481156
GSTM4	1.71471	0.601994
DOHH	2.37447	0.544636
CENPX	2.75767	1.44673
TSN	3.48041	1.49667
TATDN2P2	2.4192	0.302908
NMNAT2	1.44716	0.180028
RBBP6	3.31374	0.939285
GGN	1.69679	-0.698773
DTNB	2.4553	0.367308
CYP2T1P	1.78103	-0.0378951
UPK3B	2.31974	1.03905
KLHL21	2.81013	0.643783
AC131212.3	1.93382	-0.429178
SHH	1.82603	-0.900865
ENO4	1.31162	-1.05271
MKLN1	3.61138	0.524679
SLC29A3	2.25317	1.01039
MCM10	3.38871	0.340703
ELF4	2.88499	1.43519
SCNN1B	-0.261439	-0.12594
AC120114.2	2.38915	-0.182449
AC005014.3	-0.261439	-0.330663
KMT2B	3.10812	0.698845
NPNT	1.46674	-0.400949
NUTM2B-AS1	2.90332	-0.0772264
SGO1	2.93024	0.0814329
CHPF2	3.0405	1.5064
AL121832.3	1.64811	-0.327012
PCSK9	1.72233	0.249693
RN7SKP16	0.977121	-0.13555
SNORD62B	0.588046	0.69891
APOM	1.64745	-0.0486716
ZNF611	1.88929	-0.303244
EFR3B	3.12414	-0.126335
PPARD	2.15125	0.910842
AC027514.2	1.15903	-0.623059
AC087500.1	1.15903	-0.973929
ASH1L-AS1	1.7745	-0.00192059
DRC3	2.04111	-0.303262
AC005962.1	0.451545	-0.765813
SLC44A3	1.94493	0.804516
KIAA0513	1.90898	0.119374
AC087276.1	1.03959	-0.15532
SPRY1	1.13004	-0.105605
HOXC4	1.56029	0.197112
PDP2	1.96758	0.480523
HERC2P3	3.10417	0.345547
AC020978.4	0.150515	-0.587293
AL590666.1	0.946047	-0.529357
HS6ST1	2.6891	0.721532
AC112722.1	0.723579	-0.587557
MIR339	-0.110924	-0.225724
WASH5P	2.48221	-1.31936
HERC2P9	3.2674	-0.00492614
LINC00598	1.24428	-1.92356
L3HYPDH	2.99622	0.699112
TMEM41A	2.7742	0.55945
AL135999.1	2.3305	-1.46251
CASKIN2	2.64254	0.455867
GATA2	1.72757	1.36821
ZNF668	2.24392	0.103001
TMEM50A	3.14147	1.31596
TTC14	3.08541	0.408277
PLEKHF1	2.09531	0.131479
ZFYVE27	2.72247	0.961442
SEMA3F	1.78363	0.153606
FAM46C	-0.0228787	0.269846
ST6GAL1	2.13943	0.336696
HMGCS1	3.467	1.19534
HOXA6	1.39863	0.0346043
ACTN1	3.78446	1.37152
ROR1	3.03465	0.376441
GJB4	0.650515	0.181826
CHST3	3.44369	0.644231
MAP3K9	3.06318	0.344667
LINC02078	0.588046	-1.62027
ACKR3	2.39231	-1.34694
HOPX	0.389076	-1.28996
FAM174B	1.98445	1.06819
CDC25A	2.89512	0.432738
TGFB2	3.17748	0.396911
MDFIC	2.68975	0.916733
AC004596.1	1.17121	-0.774543
RNU6-8	0.451545	-0.0812929
AL596244.1	0.539591	-0.345075
UNC5B	1.42654	-0.0744937
CHSY1	3.23191	0.38225
DGKH	3.08202	0.0552443
TMEM30B	0.80103	0.665579
ARFGEF3	2.95213	0.418183
FAM83A-AS1	0.389076	-0.0081758
AC002064.1	-0.110924	-0.858316
NCF2	2.21897	0.175637
PAX9	1.97562	0.163064
BCL9	2.32194	0.770756
PDXK	3.84645	1.08955
IFFO2	3.3967	0.0115055
PRMT2	2.94232	0.707246
TP53INP2	1.63708	0.136295
BCL9L	3.1543	1.0128
PITRM1-AS1	2.20628	-1.32675
AP001350.1	2.10763	-1.13455
AC139149.1	1.31162	0.159293
AP005899.1	1.63499	-0.162488
AP001625.2	0.259257	0.0153315
SYNGR2	3.07955	1.45921
SLC43A3	0.723579	-0.21005
AC069499.1	1.86668	0.156333
AC008735.1	1.18829	-0.287619
AC004706.1	0.5	0.540536
GLB1L2	1.98	0.743042
PDGFB	2.17319	1.12707
RFX1	2.0103	0.53971
ADAMTS14	-0.0228787	-0.109494
P2RY2	2.39986	0.787222
CTBP1-AS	2.01729	-0.459231
AC007191.1	2.50155	-0.386679
DHX37	3.14195	0.660595
ASB16	1.99689	-0.44617
ARMC10	2.86992	0.85501
MED16	2.38824	0.993678
AC009119.2	0.991136	-1.53692
KLHL25	2.56295	0.130871
AC112497.1	1.64932	-0.25763
BRD1	2.76902	0.666747
L1CAM	2.08726	1.10382
SRCIN1	1.48932	0.165902
LINC01128	2.3516	-0.0610697
INSIG2	2.2224	1.20856
SNORA55	1.35208	0.38408
RCCD1	2.93285	0.609444
TTC31	2.67407	0.764296
CNIH2	1.30955	-0.318315
NOL12	2.54121	-0.505637
AC027575.2	0.389076	-0.327433
LYG2	1.28644	-1.2336
DHPS	2.62606	1.19431
FFAR4	0.928666	-0.48607
MIR200A	-0.261439	0.551982
PPME1	3.20225	0.910497
SDK1	2.077	-1.69259
FUT9	-0.110924	0.155361
HELLPAR	3.34643	-1.90889
CAVIN4	1.53557	-0.626623
AZGP1	0.588046	-1.58346
DBF4B	2.95423	0.32857
RAD54L	2.55042	0.614316
PLAGL2	2.55207	0.901595
TMEM109	3.1739	1.68996
COL18A1-AS1	1.94471	-1.6907
SEMA4G	2.27415	-0.289286
SLC47A2	1.61058	-0.709379
ST14	-0.110924	1.47265
WDR97	1.93906	-1.17765
MSRA	1.99965	-0.0637799
CYB5RL	2.4369	-0.226187
INSR	2.76959	0.205392
SMG1P1	3.28541	-0.155613
CHD5	1.62764	-0.716284
AC011445.1	0.922549	-1.09525
QSER1	3.46182	1.02037
PRR12	2.66271	0.976696
AC116913.1	1.99714	-0.722757
AC120114.4	2.36896	-0.0348736
MAK	1.88726	-0.340282
RASGRF2	1.89184	-0.877898
KANTR	2.8582	-0.241965
SYTL3	1.22742	0.084861
PISD	2.67714	0.755868
CENPM	2.54786	0.566865
MIGA2	2.6887	0.729264
SLC51A	1.59049	-0.505982
LINC01252	0.30103	-0.915516
S100A9	0.127636	2.71979
CMTM8	1.9617	0.891042
CLUH	3.56597	1.24572
AATK	1.23784	-0.395837
ZNF852	2.00747	-0.309687
AL031587.5	2.00818	-0.356026
AL136531.3	0.723579	-1.51481
HSPA1L	2.35245	-0.274272
AP000523.1	2.28937	-1.17303
NPC2	2.97341	1.96079
PTK2	3.57844	1.11114
LAMP3	0.539591	0.363015
FAM98B	2.63095	0.704344
AC092375.2	1.39655	-0.907687
TRIM29	1.5642	0.469031
CDS1	1.79675	1.35232
OTUD6B	2.82355	0.653749
TMEM117	2.00935	0.3675
AL157938.2	1.79934	-1.53307
C3orf52	2.6109	0.192946
TMEM33	3.47359	1.29541
ITFG2	2.65337	0.119347
NR2C2	3.42808	0.562459
TBX2-AS1	1.43753	-0.257127
KRT17	-0.0228787	-0.756106
AP002907.1	1.86736	-0.666162
ZFP41	2.61677	0.0627123
AC253576.2	0.738561	-0.5976
AC104066.1	1.11265	-0.635862
C12orf65	2.68199	0.426344
LRRC42	2.57206	1.48219
ZNF649	0.778151	-0.0275617
UBALD1	2.37419	0.828897
AL121672.2	1.32222	-0.808572
AC007938.1	0.30103	-0.992854
AGAP4	2.28457	0.68117
PPP1R32	0.738561	-0.378331
CLN6	3.18692	0.19842
LRIG1	2.08277	-1.03309
TMC6	2.13066	1.12864
TGFB1	2.75243	1.39181
AC005722.2	0.80103	-1.00615
C1orf220	1.84062	-0.484031
HYAL2	2.64351	0.458046
IGFBP5	-0.0228787	-0.330937
MEGF6	2.6451	0.522917
ZBTB24	2.59159	0.342531
DUSP23	2.405	0.935004
C9orf116	1.65746	0.704479
NR3C2	1.3388	-1.13014
PDZK1IP1	1.82133	-0.67385
TTC19	3.27112	0.874818
ZMYND19	2.80822	0.880385
CORT	1.25257	-1.00464
DDX31	3.00227	0.542118
GTF2A2	3.20663	0.941785
RCHY1	2.55931	0.123962
AC009032.1	1.87168	-0.78673
AC009120.2	2.36717	-0.00067634
ARHGEF28	3.39158	0.702469
AGAP6	2.39986	0.831666
SLC2A6	2.63871	0.536219
AC005740.4	1.07306	-1.00052
AL513327.1	1.77327	-0.535381
NOX5	0.539591	-0.616089
LINC00115	1.49383	-0.870465
PID1	1.51671	-1.31938
AL118516.1	1.76891	0.0228262
MTAP	2.66185	0.459009
LOXL1-AS1	1.20749	-0.191041
AC008781.2	1.69547	-1.64705
SNRK	2.37518	0.165205
AC008915.2	1.88958	-0.895898
PHLDA2	1.98991	1.16914
KRT7	4.39991	2.55905
CYSRT1	1.36008	1.14275
COL4A1	3.6671	0.446218
AL022328.1	1.12276	-0.354559
ENTPD1	2.22227	-0.259286
SETD1A	2.68991	0.843797
PIAS4	2.54282	0.78753
HSBP1L1	2.26389	0.919914
ELMSAN1	3.02445	0.541591
AL023806.3	1.67347	-0.965148
ECT2L	1.48932	-1.3249
UBFD1	3.08815	0.888931
PTPRU	2.60314	0.826833
AC093525.7	1.93949	-0.837264
AC021491.4	0.80103	-0.676688
ESR2	1.44577	-1.27036
KAT7	3.23084	0.602024
GATC	3.18895	0.523685
AC016586.1	1.62691	-0.886965
CDK3	1.56565	-1.14886
VGLL4	2.79499	0.44143
PLOD1	3.05234	0.942468
RYR3	2.13476	-0.89599
FSCN2	1.79575	-0.00535468
KIAA0141	3.01937	1.08179
AL157786.1	0.738561	-1.54313
RNF208	0.66111	1.21084
PLK1	3.26047	1.20859
AC005476.2	0.723579	-0.176334
MGAT5	3.25877	0.592416
MYH9	4.35406	1.78504
RAP1GAP	2.85821	0.636767
AC131532.1	-0.110924	-0.63443
TBX2	1.74101	-0.786792
AC073254.1	1.18181	-0.592187
AC007686.3	1.15375	-0.593208
AC026356.2	1.86296	-0.577042
ARF1	3.35342	2.27034
AL008718.3	0.977121	-0.759101
NT5C	2.88107	0.486965
DTX1	-0.110924	-0.859707
CACNG4	2.42787	1.1918
FOXO6	1.13938	0.133293
CRY1	2.91617	0.780301
CUZD1	2.23575	-0.263424
DDX42	3.45445	1.12097
FBLN1	2.46469	1.63633
LTB4R2	2.41178	-0.328474
AC009237.14	0.30103	-0.0055194
SARM1	2.75385	-0.541998
KLHL35	1.27875	-0.163427
RAB11FIP3	2.88633	0.63426
CYB561D2	2.16622	0.442098
SIPA1L3	3.51605	0.646392
CICP27	0.539591	-1.34137
OBSCN	2.8665	0.357829
AJ239328.1	0.539591	-1.77543
SEMA6A-AS1	0.977121	-1.70423
AC022150.2	0.150515	-0.427118
AL139095.3	-0.110924	-0.0119139
ZG16B	0.738561	0.581669
ZFP82	1.83862	-1.07623
DIS3L2	2.96329	0.187115
ABHD17C	2.55482	1.0716
LINC00106	0.738561	-0.0950573
TBX15	-0.110924	-1.47334
AL450306.1	2.25203	-1.02247
GTF2IP7	1.9864	-0.55388
FAM87B	0.922549	-1.08189
PDCD2	3.00467	0.965879
IDH3A	3.216	0.419727
RANBP3	2.83062	0.737223
BAG6	3.09294	1.69565
MMP28	1.63429	-0.711583
TRABD	2.58874	1.20945
MKRN2OS	1.51142	0.378385
LAYN	1.5642	-1.11572
AC110079.2	0.0395906	-1.40908
AL049552.1	1.51831	-0.462701
AC092611.1	1.02461	-0.946307
BRIP1	3.40023	0.0179439
KCNAB2	2.45317	0.306541
MCM9	3.01894	-0.202239
PPIF	3.1624	1.51878
CSAD	2.28411	0.432155
AC105389.2	1.28875	0.0164596
ATPAF1	2.81262	1.11634
ATP1B3-AS1	1.40579	-0.468057
AC107398.2	-0.110924	-0.5714
AL390728.4	2.66541	1.11825
FGFR1OP	2.72105	-0.256753
AC007066.2	1.72512	-0.207877
MFSD12	3.07942	0.630807
RILP	1.92267	0.53608
B4GALT3	2.64982	1.0466
ALG3	2.7864	1.36501
SNX18P3	2.3499	-0.746687
C19orf57	0.627636	-0.0152042
TSACC	1.52266	-0.178667
AC021016.2	1.66018	-0.563781
AC017104.3	1.16723	-1.00694
QSOX1	3.14459	1.10792
AL590666.2	1.60192	0.656665
LPCAT3	2.57994	0.617403
ZNF845	2.69384	0.762912
SEMA4C	2.69132	0.937662
DGKZP1	2.48777	0.554233

## Sheet: F_Correlation_DownPC9UpMLN
Best-fit values
Slope	0.5034
Y-intercept	-0.9299
X-intercept	1.847
1/slope	1.987
Std. Error
Slope	0.01936
Y-intercept	0.04378
95% Confidence Intervals
Slope	0.4654 to 0.5413
Y-intercept	-1.016 to -0.8440
X-intercept	1.773 to 1.919
Goodness of Fit
R squared	0.3152
Sy.x	0.7028
Is slope significantly non-zero?
F	676
DFn, DFd	1, 1469
P value	<0.0001
Deviation from zero?	Significant
Equation	Y = 0.5034*X - 0.9299
Data
Number of X values	1471
Maximum number of Y replicates	1
Total number of values	1471
Number of missing values	0

## Sheet: F_logFPKM_UpPC9DownMLN
gene_name	log (fpkm)_MLN	log (fpkm)_PC9GR
HAUS2	2.28583	0.694054
BSN-AS2	0.874094	-0.548251
STK16	2.37075	0.998401
AGPAT1	2.58216	1.12121
AL451074.6	0.389076	-0.914637
SUGCT	-0.110924	0.231523
BX005019.1	-0.0228787	-0.544033
MAP1LC3C	-0.522879	0.417078
NUDT9P1	0.451545	-0.691075
BBS12	2.01047	0.363072
HMGB3P31	0.150515	-0.667386
HIST1H1PS1	0.889076	-0.651781
GRK5	2.15609	-0.0378074
VWA5A	-0.522879	-1.29489
AC004890.3	0.311625	-0.491543
RNF4	2.95324	1.07769
FPGT	2.64396	0.479045
AC023790.2	0.389076	-0.933226
MMP16	1.18829	-1.6358
EMILIN1	1.37058	-0.245732
TAF12	2.56243	1.14648
AP002990.1	0.889076	-0.506456
AC007952.2	1.76929	-0.881717
AC079866.2	1.44041	-0.763716
GRXCR2	-0.522879	-1.07447
HLA-J	0.811625	-0.494484
CYP1A1	-0.522879	-0.886853
LINC01270	1.84572	0.14974
UNC13B	3.1214	-0.502766
AC027307.2	1.47952	0.831456
SLC9A3	0.0880456	-0.201302
FAM218A	1.24708	-1.04897
LILRA6	0.811625	-1.42746
CR381653.1	2.14978	0.0335696
GATA1	-0.522879	-1.42869
KLF4	2.03493	1.32843
MIR5010	0.738561	-0.231434
LMO4	2.68394	0.894775
KRCC1	2.70392	1.49522
TFEC	0.69897	-1.72924
IL23A	-0.522879	0.0657539
FST	1.74222	-0.676084
VWCE	0.30103	-1.6811
SCRN1	3.37085	1.64334
NUGGC	-0.522879	-1.09842
METTL7B	2.16638	-1.12939
AC114812.4	1.32173	0.311712
UPK1B	2.30766	-0.595513
SVOPL	-0.522879	-0.615106
AP001830.1	0.0395906	0.115873
AC148477.3	0.972241	-0.437325
CASP1	-0.522879	-0.724928
PRRT1	0.0395906	0.481663
RAC1P2	2.71768	0.952361
SECTM1	0.66111	0.750259
AL672207.1	1.41368	-0.956122
TCTA	2.22221	0.717668
AC079075.1		-0.438862
B2M	3.39241	1.80927
C6orf141	2.90025	0.120688
C6orf52	1.26317	0.268085
TLR5	0.89967	0.0223326
KLRG1	1.09656	-1.40785
HPCAL4	0.588046	-0.149306
SEMA3B-AS1	-0.522879	0.250559
ALG13-AS1	0.928666	0.172746
LRRC37A16P	2.05202	-0.00450767
DICER1-AS1	1.53557	-0.286969
FOLR2	-0.522879	-1.40366
DDIT4L	1.38021	0.250247
RPL23AP97	0.874094	-0.666233
LINC00622	-0.522879	-0.237676
AC138466.4	-0.261439	-1.18304
OR2A7	-0.522879	0.221941
KCTD2	2.75378	0.79327
AC106864.1	1.25257	-0.70516
PIANP	1.03959	-0.466763
PIFO	-0.522879	-0.551817
CATSPER2P1	1.28702	-0.854625
KLHDC1	0.752575	-0.462811
IL9RP3	0.190106	0.0469761
AC021739.5	-0.522879	-0.527899
SYNPO2L	-0.522879	-0.720664
ZNF775	1.56677	-0.368783
PPP1R15A	2.80365	1.65382
ALOX12	1.471	0.0832508
RPE	3.12899	1.32307
MRAS	1.57368	0.211188
AC079880.1	1.1722	-0.675287
TUBB2B	1.50579	-0.348102
AC018816.1	0.215682	-0.698439
AL355574.1	1.1722	0.266986
RNF167	2.8469	1.67826
ZSCAN12P1	-0.110924	-0.243637
SCG2	1.12764	-0.325277
AK8	-0.522879	0.0657918
SNX18	2.53606	0.766165
TIGD4	1.41141	-0.424473
NAP1L5	1.46136	-0.448089
TARS2	2.69764	1.12905
C1RL-AS1	2.73412	0.210352
AC009113.1	1.74115	-0.310111
MAP3K12	2.55888	0.0907773
PSMG3-AS1	1.54811	0.443885
FBXO47	-0.522879	-1.35532
AL353807.3	1.525	-0.00585206
AL683813.1	1.44688	-0.322797
MPIG6B	0.0395906	-0.145482
AC096540.1	0.389076	-0.71307
GNG7	-0.522879	0.369936
SPATA6L	1.73638	-0.348805
AL132780.2	1.50536	-0.156147
THRA	2.69227	0.505484
ENO3	2.50468	0.198138
ASIC4	-0.0228787	-1.2533
DET1	2.42264	0.0409639
SLC1A3	-0.522879	0.768705
FNDC10	1.57088	0.516737
AC106869.1	1.1722	-0.442188
CHP1	3.39347	1.61451
HNRNPA1P59	1.4976	-0.0397338
C2orf15	0.723579	0.744944
AC012358.1	1.33835	-0.313681
FTCDNL1	1.77863	-0.330525
C20orf194	2.66252	0.275951
AP000924.1	-0.522879	-0.704507
C22orf39	2.2721	0.279959
ANKRD33B	2.97254	0.345942
PER1	1.8451	0.670901
AC005154.1	2.60565	0.130796
LMCD1	2.76564	-0.112814
AC012512.1	1.01059	-0.4837
AC005046.1	2.08457	-0.0669816
BCL6B	-0.0228787	-0.892222
CD200R1	-0.522879	-1.05081
C22orf15	0.811625	-0.856534
ADNP	3.32036	1.52339
RNY4P10	0.477121	0.672678
AL391069.2	1.07306	-0.946043
ARHGAP24	1.80485	-0.27272
AGBL2	1.41625	-0.0977946
AL355312.1	0.627636	-1.14951
LINC00663	0.866197	-0.347851
WDR83	1.70581	0.398374
AC133552.5	0.190106	0.0310042
THUMPD3-AS1	2.67263	0.468945
UGT8	0.866197	-1.76556
HINT1	3.28323	1.82056
AC109347.1	1.02461	-0.434637
AC005229.4	1.76859	-0.108009
RHOBTB1	2.78409	0.536157
HSD3BP5	-0.522879	-0.275887
AOX1	1.87919	0.0922401
ABTB1	1.63429	0.792863
PHKB	3.23298	0.89562
RBAK	2.64905	0.919416
EHHADH	2.37603	0.222414
FKBP9P1	-0.522879	-0.701661
PARD6B	3.02112	0.932977
AC040160.2	1.50323	-1.21723
MAST4-AS1	0.826606	0.134486
AC079684.1	1.44605	0.144904
KDM4A-AS1	1.70948	-0.405963
UGCG	3.19829	1.53969
AL121895.1	2.01827	-1.15622
HCP5	0.349485	0.351195
UCN	1.10206	-0.0704689
AC110373.1	1.09656	-0.651896
AC018645.2	1.77376	0.365919
SLC39A14	3.62665	1.04261
AL020996.1	1.16723	-1.29729
AC106782.1	1.7297	-0.113445
YBX2	0.778151	-0.850465
AJ003147.2	-0.522879	-0.155701
LYPLA1	3.36841	1.4318
EML1	3.12699	0.108053
LINC00482	1.12764	0.467091
CHMP5	3.10672	1.62291
ESRRAP2	1.24286	-1.31861
AC010198.1	-0.110924	-0.569071
AL645608.1	2.17725	-0.0102897
RAP1GAP2	2.67911	0.791571
AC046143.1	1.35379	-0.149493
RNU6-100P	0.30103	0.0401791
AL512329.2	-0.110924	-0.631649
HMCN1	-0.522879	-1.35914
CCDC186	2.96494	0.478815
AC005736.2	-0.522879	-1.04099
SIRT4	0.977121	0.228068
ARL4C	3.52308	1.0617
UBQLNL	-0.522879	-0.801052
AC114812.2	1.05697	0.468339
LPXN	1.69182	0.487312
ALDH1A2	-0.522879	-0.749296
EGR1	0.80103	2.03683
THSD1	2.367	-0.819028
AC005632.2	1.42867	-0.487553
AC098934.2	0.5	-0.0223658
KLF6	2.51971	0.791558
MROH3P	-0.522879	-1.42038
AC010186.3	1.95403	0.600554
HECW2	2.07891	-1.11416
AL592114.3	1.09376	0.014132
AL354892.2	-0.0228787	-0.0474463
PPP1R42	-0.261439	-1.27144
RNF216P1	2.44337	0.425661
SMPD1	1.84399	0.625732
MOCS3	2.52207	0.791737
HSF2BP	1.0043	-0.235587
AC046143.2	0.30103	-0.0646854
AL136309.2	-0.522879	-0.799504
RNU6-875P	0.845098	-0.0449117
PLA2G4A	3.15954	-0.423301
HLA-DMB	1.98438	-1.27909
AC008467.1	1.29885	-0.969802
FAM229B	1.98342	0.527434
PPP2R5C	3.22188	1.39304
AL137145.1	0.795532	-0.498087
AC008147.2	0.389076	-1.40713
NDUFB5	2.82852	1.27677
AC022079.2	-0.0228787	-0.444999
SLC26A4	0.5	-0.919346
PYCR1	2.92332	1.24118
AC121338.2	0.66111	0.077301
EREG	3.59242	0.888537
SUMF2	3.13726	2.02575
AC244033.1	0.90309	-0.891085
PTX3	-0.522879	-0.087651
AC090971.3	1.49383	-0.161815
ANG	1.38469	-0.0990139
RIOK3	2.9502	1.23952
NSUN5P1	2.64415	0.770442
ATP6V0E2-AS1	1.83232	-0.544298
ABLIM2	0.89967	-0.480342
GTF3C2	3.2318	1.05002
FFAR1	-0.522879	-0.781346
AC007663.1	-0.522879	-0.45227
TXNIP	0.30103	2.35245
SRSF8	2.69155	0.76685
GLMP	2.3991	1.03121
H1F0	2.54365	2.10838
AC242426.2	1.68829	-0.521752
Z93930.3	0.772034	-0.667007
THAP2	2.04474	-0.137299
ITGAM	1.93906	-1.17303
AL133297.1	0.690106	-0.381856
DUSP19	2.24536	-0.205845
AC110285.7	1.17121	0.0979848
LRIF1	2.76661	0.994325
OSCAR	-0.110924	-0.177908
AC107294.2	-0.522879	-0.033939
AC007249.2	0.477121	-0.918913
GPR179	1.24286	-1.54634
AC106739.1	1.24144	-0.149404
PLCG2	2.27028	-0.242163
SDAD1P1	1.83326	-0.518346
AL080250.1	0.922549	-0.364315
DMKN	1.27327	1.01434
MSH5	2.72112	-0.424356
BLACAT1	-0.110924	0.866364
B3GNT4	1.60152	-0.523522
AC008555.8	1.55529	-0.343455
PSORS1C1	1.42162	0.0247125
AL445231.1	0.451545	-0.0528075
SP1	3.38103	1.45158
C1GALT1C1L	1.48189	0.454562
AC017100.1	1.27203	-0.4196
SERPINB1	3.10839	1.59826
GDPD3	0.66111	0.452591
FOS	1.79115	1.42985
SRP14-AS1	1.27815	0.408698
TUBB6	2.96617	0.943257
AC073073.1	1.32948	-0.0831268
PRODH	1.65799	-1.08441
CORO1A	1.58173	0.186806
SLC4A1AP	3.00577	1.11712
AC015849.5	0.90309	-0.537849
COPS8	3.00195	1.18532
AC020658.6	0.150515	-0.84663
AC010531.5	0.811625	-0.546081
ENTPD3-AS1	1.41206	-0.217933
MYRFL	0.389076	-0.700743
AC129492.5	0.588046	-0.057846
AL591895.1	1.14833	1.32867
LOH12CR2	0.723579	-0.679016
VWA7	1.12276	0.408926
ISG20	1.85302	-0.418119
ANKRD29	2.06289	-0.53653
LINC00926	1.2297	-0.610085
ATP6V1E1P1	1.80254	-0.0366206
ARHGAP31-AS1	0.0880456	0.00092894
MRPL40	2.66839	1.31951
AC116407.1	-0.0228787	-0.756321
ZNF34	1.92548	0.238885
FAM86EP	1.90417	-0.0678782
XBP1P1	1.32173	-0.474126
SCML1	2.57708	0.669202
RAB13	2.69652	1.60536
CDKN1C	-0.522879	0.338322
ZFAND3	2.50315	1.55362
AL645608.3	1.8026	-0.798706
PRSS16	1.4529	0.725938
ADAMTS13	1.02461	-0.187931
SPATA21	0.60206	-1.7057
GBP3	1.97784	1.03814
AL354798.1	-0.522879	0.023612
FGL1	2.51627	-1.6709
TLE6	1.16723	0.123158
LINC01634	-0.522879	-1.4283
PARP4P2	1.82496	-1.45644
UGP2	3.33517	1.24525
DNMBP-AS1	1.13592	-0.879299
GPX3	1.95035	0.710339
CEP57L1P1	1.61071	-0.690712
AC009121.2	0.752575	-0.714492
AC016405.1	-0.522879	-1.02735
LINC01426	0.650515	-1.14121
AC025524.2	-0.522879	-1.39187
TRIM59	3.41797	0.48584
AHNAK2	4.11333	0.278257
AC080162.1	1.31162	-0.0119491
RN7SL268P	0.650515	0.112693
C1orf116	2.22559	0.996171
MTMR3	2.31277	0.151693
AC073349.2	0.778151	-0.70985
CUTA	2.52545	1.76103
AC016355.1	1.16723	-0.65733
MTMR11	2.26694	0.639577
MIR553	0.588046	0.0152386
SUMO2P17	1.85628	-0.064525
ATP2B1	3.7609	1.11729
AL590729.1	0.190106	-0.651023
IGF2BP1	3.50985	1.09665
CD44-AS1	1.42654	0.407847
FBLN5	0.627636	0.0210294
BORCS8	2.11937	0.0880929
APBA1	0.943245	-0.611495
COX7A2L	3.20843	1.5814
BEAN1-AS1	-0.110924	-0.749607
GDF15	2.26513	1.45662
AC008734.1	-0.522879	-0.564146
PON3	2.75143	-0.765755
SEC1P	0.69897	-0.0244597
AES	2.99625	1.36309
BBC3	1.79885	0.733261
ZNF181	2.52989	0.0555054
DAD1	3.22198	2.24054
AC026954.1	-0.522879	-0.94577
AC020763.1	0.451545	-0.692717
BVES-AS1	0.943245	-0.761665
CCDC106	2.08101	0.107026
USP32P2	1.54407	-1.1734
WNT8B	0.0395906	-0.929129
LRRC8D	2.66039	1.17669
INE1	1.74812	-0.273785
TMEM191C	0.972241	0.116553
ALDH2	3.25633	-1.1949
AC068790.3	1.35379	-0.535251
PIN1	2.5947	1.02639
RASA4DP	-0.522879	-0.310931
ZSCAN16	2.11129	0.733967
AL008729.1	1.40646	-0.64073
AC022306.2	1.09656	-0.645076
AC107884.1	0.874094	-0.722935
FAHD2P1	0.389076	-0.444454
GPR19	1.33512	0.384296
ZMAT5	2.07257	0.773675
PPIAP29	3.02003	0.969354
EPX	-0.522879	-0.715749
AC020604.1	0.0395906	-0.0131699
AP003774.1	-0.522879	-0.447056
ZNF467	0.840621	0.913109
LGI4	-0.522879	-0.50926
AC012170.2	1.56757	0.0879966
LINC01358	-0.522879	-1.60349
AC069257.2	0.30103	-0.283887
AL162615.1	1.56565	-1.0108
PJA2	3.16776	1.25522
AGTRAP	2.56734	1.33796
TPMT	2.56946	1.05728
AL024507.2	1.3962	-0.947828
ZC3H6	1.85302	0.107784
LINC01786	-0.522879	-0.0689661
STMN1P1	0.951545	-0.335635
TMEM25	0.89967	0.446048
LAMB3	2.60709	1.81994
PPL	2.24708	1.48351
Z97985.1	0.772034	-0.376386
CCDC113	2.33326	0.663354
CEBPD	2.26126	0.401674
IL1A	0.90309	-0.245263
GNRH1	1.57736	0.0234577
LINC01237	-0.522879	-0.325503
RABGEF1	2.77897	-0.414385
MST1P2	0.215682	-0.107136
AC099850.3	2.20745	1.32755
AC004771.5	0.0395906	-0.426181
MSANTD3	2.89293	0.868617
HS3ST6	0.866197	-0.755364
ACBD7	1.11394	0.232468
EME2	2.49713	0.56512
TRAPPC5	2.04583	-0.88082
ATP2B1-AS1	1.57736	-0.934247
ZFP90	2.60704	0.632439
AP2B1	3.79696	1.29047
IGFN1	1.53777	-0.0946528
GPR1	-0.522879	0.608919
AC010201.1	0.477121	-0.359969
GTF2IP13	1.74998	0.392675
PDZD7	0.738561	0.217013
TRIM14	2.53283	0.961796
BLOC1S5	2.49195	0.631418
FIGN	2.39587	-0.0103721
AC135721.1	1.62127	-0.110606
ZNRF3-AS1	1.42317	-0.869601
TM4SF1-AS1	1.17609	-0.739159
LINC00672	1.58572	0.133407
ZBTB4	2.98152	1.43588
NME4	2.94611	1.34203
IRF2BPL	2.61308	1.43934
GAPDHP58	0.539591	-0.46179
ANO7L1	-0.522879	-0.195833
CYTH4	1.29217	-1.27524
SLC25A42	1.42685	0.492636
AC105339.3	1.44688	-0.67131
SLC1A6	-0.522879	0.676208
GGACT	1.54247	0.269353
AC068533.3	-0.522879	-0.0978768
MICD	1.23856	-0.52126
RBM34	2.87975	-0.563594
AP000553.1	0.889076	0.399178
SYNE3	0.997818	0.00845881
RSG1	1.74708	0.0883845
ZNF717	2.17347	0.0285073
FYB1	2.62807	0.758491
USP46	2.68113	0.697598
TMEM236	0.738561	-0.525581
AP001025.1		-0.569999
AC020661.1	0.840621	-0.64515
NDUFV1	3.06863	1.89091
ATP1A1-AS1	1.65735	0.0295893
C1QTNF6	2.40595	1.12845
ARL6IP5	3.15941	1.55697
TNKS1BP1	3.24506	1.62536
HELB	2.84645	-0.252613
AC044860.1	1.79581	-0.089066
DNAJC27	2.06029	0.124212
MTFP1	2.38717	-0.597617
EEF1AKMT3	2.09852	0.604364
MAPK13	0.690106	1.47676
AC006449.6	1.53777	-0.305475
NSMCE1	2.68708	0.886531
OR1F2P	-0.522879	-0.571063
ADTRP	0.60206	0.320719
CRMP1	2.04534	-0.563582
PDE4B	2.92254	-0.942523
CLIP4	3.15083	1.15464
FABP6	-0.522879	0.0468561
CCDC180	-0.0228787	-0.967674
LINC00339	2.08978	0.612999
LINC00888	1.85327	0.374428
PCYOX1L	2.16939	0.336453
ANKRD13A	2.6682	1.24763
TMEM229B	0.627636	-0.688595
IL32	1.68049	-0.548146
AL008723.1	-0.522879	-0.605024
CAT	3.02817	1.27916
AC024075.3	0.951545	0.418385
MADCAM1	-0.522879	-0.629694
DCAKD	2.64231	0.880081
AL138762.1	1.2297	-1.3076
CD22	0.870181	0.527389
PPIC	2.35956	0.997839
AC084033.3	2.07733	0.204774
PNPLA7	0.778151	-0.772281
SHISA7	-0.522879	-1.25856
STX1B	1.58747	-0.480096
UBALD2	2.01719	1.48245
WDR83OS	2.57483	0.62782
KCND2	-0.522879	-1.63755
MIR3653	-0.261439	0.207728
AFTPH	3.2185	1.33471
SBF2-AS1	2.16272	-0.344201
TSPAN4	3.12494	0.691107
AP000356.3	0.991136	-0.661141
MORF4L1	3.4817	1.58
ZNF350-AS1	0.738561	-0.76797
AC010894.2	-0.522879	-0.139631
TUBA4B	-0.522879	-1.2767
AMOT	-0.0228787	0.855114
ETV1	2.0679	-0.773882
ZFP42	0	-1.37579
ZKSCAN2	2.52729	0.0783882
ERC1	2.97374	0.579999
SCARF1	0.477121	-0.64699
MINCR	1.85859	0.404505
GAPDHP22	0.30103	-0.196201
C17orf97	1.57978	-0.212754
AC100800.1	1.6928	-0.83049
MED20	2.69063	1.09989
NFE2	-0.522879	0.530185
LINC00884	-0.261439	-0.146743
SLC6A4	0.977121	-1.83725
IFT46	2.46638	0.698742
GK	1.83373	0.200347
HMGB2P1	1.42867	0.108165
AP002026.1	1.06677	-1.04068
AL118558.4	0.539591	-0.0979291
AIDA	2.8723	1.35355
LYRM1	2.27764	0.882329
AC009163.7	1.40241	-0.728598
UBE2F	2.58593	0.500634
AC004264.2	0.866197	-0.772941
ARMCX5	2.53433	0.415048
TEX19	0.997818	-0.330927
AC104596.1	0.451545	-0.333439
TRIR	2.63028	2.06615
TFCP2L1	2.61757	-0.0857551
AL136964.1	-0.522879	-1.62792
AC010654.1	1.39967	-0.900623
POLM	2.24043	0.7549
AC127526.2	-0.261439	-0.60488
CENPH	2.81065	1.15476
ELF3	3.30017	1.37958
LCN12	0.778151	-0.762843
TSEN15	2.50683	1.30031
AC107214.2	0.866197	-0.613945
GCM2	-0.110924	-1.23879
ZNF547	0.849485	-0.2309
GPATCH2L	3.28534	0.69322
KRAS	3.10636	1.24957
SIPA1L2	2.8683	-0.23155
AC005740.3	-0.261439	-0.488124
MGAT5B	2.8601	0.102801
PIM1	2.56949	1.6361
NR3C1	3.72749	0.809559
MAP2K6	2.65457	-0.162655
CDC37L1	2.8782	0.354919
WDR24	1.9753	0.629078
TTC25	1.76356	0.0224766
CXorf58	-0.522879	-1.15498
TLL2	0.752575	-1.69783
ACKR4	1.07767	-0.789398
SGSM1	0.845098	0.283836
RHNO1	2.70407	1.30262
ACTG1P15	0.451545	-0.961048
NAT6	1.14502	0.364781
VWA8-AS1	0.66111	-0.992317
LCMT1-AS1	0.422549	-0.472016
AC025166.1	0.30103	-0.072753
RGL3	-0.0228787	1.11939
FGFR2	1.38096	-1.93146
PDPR	3.0035	0.837043
LINC01759	0.997818	-0.343623
AP1M1	2.7818	0.477394
KLHL7-AS1	1.48284	-0.31544
PCDHB4	0.866197	-1.10052
AL021807.1	0.723579	-0.0592029
TTC39C	2.36606	0.311525
KXD1	2.64633	0.987828
AC019080.4	0.588046	-0.502158
AL365181.4	-0.110924	0.105052
MIDN	2.41855	1.42705
CTH	1.54247	0.744847
AC116050.1	1.62836	-0.151976
AL157400.3	0.0395906	-0.491454
MRPL17	3.15577	1.36756
ANKRD24	-0.110924	-0.342634
TCEAL4	2.30177	1.53366
GRB14	2.40454	-0.0155238
AL354877.1	-0.522879	-0.408475
BHLHA15	0.5	-0.253789
SPIN1	2.69683	1.5019
BMPER	2.10928	-1.3559
AC009171.2	-0.522879	-0.113597
EPHX2	2.29514	0.298926
AL731533.2	0.811625	-0.554453
HHAT	2.02087	0.178181
CERNA1	1.10206	-0.553126
CCDC68	2.53386	-0.188271
LHX1	1.68039	0.337319
GRTP1-AS1	-0.522879	-0.863302
AC098820.1	0.738561	-0.40156
AL358072.1	0.16111	-0.0698072
DPH5	2.54382	1.18413
FAM183A	-0.522879	-0.280222
AC012640.2	1.54247	0.130993
TAF6	2.7525	0.952685
LINC01852	-0.110924	-1.0138
HOXA11-AS	-0.522879	-1.55849
PDE2A	0.30103	-1.29312
YPEL4	2.02085	-0.597503
TBCC	2.37075	1.1792
LSM6	2.35783	0.46672
TVP23B	3.08957	1.12381
AL358075.2	-0.261439	0.462404
HIST1H1T	0.874094	-0.71669
TRIM21	2.36836	0.888351
AP001453.2	1.97224	-0.769186
TAT	0.539591	-1.38349
SNAP23	2.41163	0.64831
LENEP	0.520696	-0.814889
RHOB	2.78818	1.48021
NEU4	-0.522879	-0.974485
AC138393.3	1.5043	0.253613
ELOVL6	2.70795	1.03861
PPIL2	2.60037	0.986628
TNFAIP8	2.48077	0.702709
ICAM1	1.03959	1.26538
ZNF674	2.39967	-0.154893
AL354733.2	1.24708	-1.16457
AC005618.1	0.477121	-1.1092
TAS1R1	-0.522879	-1.35407
AL109811.3	1.3085	-0.418042
STAP2	-0.522879	0.967089
SDHAF4	1.97625	0.675544
TRAPPC12-AS1	1.53073	-0.0668937
NBPF11	2.52101	0.583679
TRIM32	2.28442	1.16839
ANPEP	1.17121	-0.63295
WWC2-AS2	0.5	-0.639205
RAD17	2.88365	1.01347
RAB30	2.35028	-0.286519
AL355336.1	1.16723	-1.31783
AC021491.2	0.937531	-0.781605
BTBD19	1.46674	-0.0384957
AC007014.2	0.90309	-0.673548
CFAP52	0.778151	-0.764391
ENPP1	2.61188	-0.536347
UPP1	2.63793	1.60384
SYT14	0.588046	-2.16343
CSF2RA	1.42255	0.75119
KSR2	1.77327	-0.785994
ATP2A1-AS1	1.24286	-0.418484
DUSP15	-0.522879	-1.47162
STPG4	1.32173	-0.376094
DUSP16	2.90848	0.823262
CD24P4	2.49195	-0.236829
SUPT6H	3.43901	0.96761
LINC00886	0.997818	0.463725
SMG7-AS1	1.36132	-0.520597
GEM	2.16272	-0.2482
ALKBH3	2.49936	1.20414
ZFYVE19	2.21784	0.763852
AC040934.1	0.778151	-0.42163
GRIFIN	-0.522879	-0.186437
EXOC3-AS1	1.63615	0.4467
CISH	1.18461	-0.255068
RASSF6	2.1089	-0.612252
SNORD63	1.11265	0.115582
GLIPR1L1	1.28875	-0.597343
AC245884.3	1.08805	0.856947
GPR61	0.752575	-1.46412
TMCC1-AS1	2.17599	-0.142096
AL162595.1	1.14165	0.125734
TTC30A	2.57131	0.337483
DPY19L2P3	1.66723	0.0361652
DNAJC19	2.41644	1.04612
CD44	3.66432	1.85615
BTG2	2.18461	0.778208
AL390719.1	1.33232	0.681469
SIRPB2	-0.522879	0.158575
TRIB3	2.78739	1.94926
ZNF446	2.30226	0.594218
CCDC28B	1.65609	0.0753367
KCNK3	1.64789	-0.731112
AC006504.3	1.48772	-0.511027
IGLV5-52	1.51347	0.893791
AC023157.1	0.30103	-0.656135
C9orf43	0.738561	-0.296947
CCDC34	2.85028	1.06953
SLC26A10	-0.522879	-0.728258
STX8	2.64512	0.686838
CNBD2	0.539591	-1.20432
SNX16	2.15566	0.318875
PDCD5	3.47282	1.19451
FGGY	1.53557	-0.219634
AC020931.1	0.5	-1.18095
AC008267.5	1.42348	0.246545
TNFRSF9	1.53959	-0.436084
SMUG1	2.51428	0.53489
FRS2	2.63079	0.760998
ST8SIA4	2.38462	-0.252992
LINC01843	1.83133	0.027247
GAS2L1	2.4099	1.08652
AL359091.2	1.2007	-0.749875
KLHL41	0.874094	-1.02947
MYO15B	2.80413	0.033551
LIMD1	3.38427	0.531844
VIM-AS1	1.52731	-1.09181
COG1	2.81491	0.534719
SLC9A9	0.627636	-0.635569
F7	-0.522879	-0.834732
SLC13A4	1.47323	-0.480417
PAQR8	1.76587	0.0722599
AL049555.1	0.588046	0.941041
SNORD46	1.56517	0.290785
NFIL3	2.21459	1.21734
FAM234A	2.55629	0.873837
AC098487.1	1.05019	-0.597693
AL590004.4	1.525	-0.109722
SLC3A1	1.72651	-1.70851
AC147651.1	1.56127	0.376239
YIPF2	2.34809	1.26348
AHR	3.24116	1.01731
NFE2L2	3.14331	1.43436
SKAP2	2.99004	1.24897
JADE1	3.32587	0.37491
DENND5B-AS1	1.13004	-1.05112
MIR503HG	1.88689	0.275308
CCM2L	-0.522879	-1.14662
PRR36	-0.522879	0.55658
HOXB8	1.74029	-1.13088
P2RX6P	-0.522879	0.120393
NECAB2	1.41497	-0.557318
ZNF419	2.11247	0.445874
AL133227.1	-0.522879	-0.534009
KLF2	1.12276	-0.0622765
PGLYRP1	0.671211	-0.468502
TNFRSF1A	3.40836	1.61786
AC025031.1	0.752575	-0.642605
CD8A	-0.522879	-0.451134
AC012184.3	1.45531	-0.289806
CA9	1.38908	0.602317
XKRX	0.69897	0.0412395
AC093901.1	-0.522879	-0.327316
AL162377.1	1.12764	-0.864309
AC124944.2	1.65609	-0.52101
LINC01783	0.866197	-0.894417
ZFHX2	1.38506	-0.415465
NR2F2-AS1	1.10874	-0.571344
AL355102.4	0.778151	-0.919966
AC004951.2	-0.522879	-0.285244
AREG	2.95627	1.26991
COG8	2.75647	0.0643901
ADIRF-AS1	1.94194	-0.0762171
AC068446.2	1.28989	-1.48771
PHYH	2.61633	0.563556
ULBP1	1.57368	0.822855
ALPK1	2.45799	0.434066
SLC11A1	0.723579	-0.97126
RALB	2.7959	1.93241
HOXC-AS3	0.389076	-1.11085
AC098484.1	0.972241	0.149249
KRT86	1.60663	-0.0755292
FZD10-AS1	-0.522879	-0.170557
CFAP74	-0.522879	-0.84287
TRIM6	2.6548	0.617108
AC131009.1	-0.522879	0.0358556
PROC	1.45154	-0.091698
DEPDC1	3.31192	0.985005
ALG1L6P	0.80103	0.540943
AC100757.1	2.21277	-0.275354
AC118658.2	1.44688	-0.681419
SPRY4-IT1	0.849485	-0.2184
ZNF114	1.75386	0.654169
AC025031.4	1.84792	-0.989125
CR381653.2	2.03298	-0.645583
AL132857.2	-0.522879	-1.29171
GTSE1-AS1	1.11522	-0.481423
UNC119B	2.87249	0.967032
ERCC4	2.87899	0.364903
SDSL	2.01471	0.757046
EXD1	0.150515	-1.39777
FAM83B	1.01671	0.796886
MIR222	-0.261439	0.207728
SP110	2.08783	0.528997
CALHM1	0.0880456	-0.885222
BIVM	2.48587	0.238843
THSD7A	3.00855	-0.336503
ZMAT1	0.477121	-1.21794
AC002116.2	1.67667	-0.26034
ZSCAN21	2.07599	0.350486
AL356275.1	-0.522879	-1.40471
UGT1A7	2.787	-0.402104
KIAA1257	0.738561	-0.224389
PLEKHB2	3.10375	1.42212
RPL28	3.1362	2.42734
BIN2	-0.522879	-1.39567
APOLD1	1.54031	0.336215
C7orf61	-0.522879	-0.629538
UNC13A	1.79188	-1.24265
CFL1P1	0.690106	-0.699862
MRPS31P5	1.30265	-0.842098
GAL3ST4	0.5	-0.391661
HHLA3	0.870181	1.07867
BAHD1	2.24396	0.864411
FTH1P3	2.53916	-1.01901
HCG9	0.127636	-0.897007
GRK4	1.42654	-0.136085
PRPH	0.715682	-0.897294
AC006159.1	1.10874	-0.479456
AC009878.1	1.42317	-0.382701
SNAPC2	1.98438	1.19048
ZNF559	2.12037	0.3585
LURAP1L-AS1	0.588046	-0.488476
NHS	2.95511	0.176407
FBXL16	1.23417	0.616384
AP000350.7	1.51671	-1.30521
CDKN1A	3.01652	1.09068
LIPC	0.928666	-1.15154
AL157838.1	1.88343	-0.0211346
AC009720.1	1.37058	0.224086
AC010643.1	0.89967	-0.244032
AJUBA	3.43273	1.24865
CIAPIN1	2.92292	1.38265
FRMPD1	-0.522879	-1.76163
HIGD2B	-0.522879	-1.14122
DNAJC19P5	1.06029	0.418967
NOVA1	1.9963	-0.32523
COL26A1	0.89967	0.251568
AC062017.1	0.650515	-0.621632
FOSB	1.36132	-0.109531
CPE	1.62152	0.0983589
TRIM46	0.889076	0.266396
MKS1	2.36373	0.624427
MIR4534	2.5688	-0.838405
TMEM269	0.723579	-0.305038
RNF222	1.07767	-0.101159
ABCA5	2.7033	-0.163185
AC245884.8	1.49782	0.0508626
AP002851.1	1.45664	-0.0093925
LENG8-AS1	1.78387	0.710211
AC009229.4	-0.110924	-0.975638
ATP1B1P1	1.52978	-0.85429
PSD3	3.35367	0.185096
RDM1	1.64165	0.317091
DPY19L1P2	1.89088	-0.244522
OR10AD1	0.738561	-1.06718
RCN3	0.723579	-0.156396
AC245297.1	-0.522879	-0.557266
ZNF554	1.17512	-0.0705042
LZTR1	2.69893	0.84745
ENPP4	1.84062	0.684015
RNF170	2.74043	0.477735
IRF1	2.5763	0.21292
PTK2B	2.25828	1.13932
USP20	2.0617	0.629472
ZFP3	1.70344	0.442984
PTPN12	2.96568	1.52732
PNPLA4	1.94936	0.948955
MIR3682	0.389076	0.836922
DSTNP2	2.55859	0.587254
LINC01220	0.0395906	-0.230226
AC026979.3	0.866197	-0.173942
RPL7L1	3.31257	1.31258
LINC01504	1.67512	0.131532
FAS	2.48691	0.0246661
AC079880.2	0.80103	-1.33646
ANAPC13	2.66584	1.47342
RNF145	3.35535	1.39119
LINC01136	-0.522879	-1.48728
PTPN20	2.07651	0.894525
NUPR1	0.690106	0.349405
GLB1L	2.01965	0.224226
AC007342.3	-0.522879	-1.78794
AC145285.3	1.07918	-0.524919
CDC37L1-AS1	0.0880456	-0.415036
AC010531.6	0.849485	-0.130376
ZFP36L2	2.52933	1.62183
LRRFIP1P1	2.17603	0.239288
AC079610.2	-0.522879	-0.339687
SCNN1D	1.19011	-0.144497
ADAM1B	0.946047	-1.01254
IFITM2	1.73224	0.448873
STUB1	2.55825	1.3435
AL353759.1	1.33835	-1.11737
P2RX6	0.826606	0.1331
EGR2	-0.0228787	-0.239615
TMEM8B	1.44465	0.0128118
GAPDHP32	-0.261439	-0.732959
YDJC	2.2601	1.7517
AC004812.2	1.83209	-0.0273695
AC022613.2	1.56565	-0.560563
PHC2	2.89488	1.14831
LRRIQ3	1.43753	-1.15486
MYH11	1.62127	-1.08706
ZNRD1ASP	2.32249	-0.31173
CDC42EP2	2.11366	0.727563
TGFBR1	3.44798	1.07343
GBP2	1.09376	0.656522
ATP1B2	-0.522879	-1.36657
HIST1H3G	0.539591	-0.324138
RFX3-AS1	-0.522879	-0.506429
AXDND1	-0.522879	-1.32177
IQCD	1.51911	0.519509
SSUH2	0.866197	0.120978
CASP7	2.81967	0.849304
TMEM106A	1.79097	-0.393852
ZNF630	0.16111	-0.35058
AC055811.2	0.30103	-0.648483
TMEM129	2.55939	1.01679
G0S2	0.588046	-0.196023
MIR573	0.588046	0.676364
CELF3	0.0395906	-1.4662
ALG1L13P	-0.522879	-0.110881
LASP1	3.80637	1.94078
PIPSL	2.66071	-0.625519
JHDM1D-AS1	1.40646	-0.240323
AL606534.1	1.16111	-0.834572
SUGT1P1	1.24708	0.0167083
ARIH2OS	1.14833	-0.20391
BCAS4	3.19121	0.63546
NNT-AS1	1.83994	0.24928
SLC7A2	2.69058	0.244871
AL391832.3	-0.522879	-0.53854
NDUFB10	2.84166	1.97148
ABCG2	3.26252	1.26672
AL450384.2	1.53759	-0.232525
AL133330.1	1.6721	0.0959595
AL133338.2	1.56193	-0.86009
AC016877.3	-0.522879	0.343558
FITM1	0.588046	-0.515383
SNORA22	1.68124	-0.0199735
AC100771.2	-0.0228787	-1.14912
POC1B-AS1	1.83697	-0.690933
FAM198B	1.32564	-0.861745
MIR6819	0.539591	-0.0379256
HIST1H2BG	0.539591	-0.35924
SEPSECS	2.35758	0.175308
CT62	-0.522879	-0.787147
AL645608.9	0.922549	0.214184
CXorf57	1.10874	-0.847992
CD79A	-0.522879	-0.846825
CCDC18-AS1	2.26946	0.442802
IL1R2	0.0880456	0.0516441
NBPF10	1.53129	-0.255999
KDM4C	3.03977	0.0540399
ERBB3	2.08158	1.47595
AC010210.1	0.866197	-0.174066
PLAG1	1.2108	-0.0443205
NAT16	0.0880456	-1.26295
AL355075.2	1.41368	-0.67264
FADS3	2.57647	0.832915
ZNF841	1.72742	0.732174
TMEM198B	1.62472	0.656026
AP003031.2	-0.522879	-0.51601
AC025171.1	1.91288	-0.0709189
GADD45GIP1	2.61977	1.46707
NR5A2	2.88408	0.0339156
MAGEA6	1.38171	1.64399
ZNF256	1.36008	0.333782
LINC00449	0.588046	-0.892082
EXD3	1.46136	0.210228
HNF4A	2.51607	-1.79849
USH1G	-0.522879	-0.57552
LINC00957	0.60206	-0.991381
XBP1	2.96011	2.12605
AKR7A2P1	1.27815	-0.513893
BPHL	2.24812	0.22341
SUPT20H	2.95414	0.754998
ACBD4	2.18897	0.599996
BSCL2	2.7703	0.274706
ANKRD12	2.76455	0.195095
LIN37	2.07479	-0.594614
SOCS2	2.11695	0.538422
C11orf24	2.49476	0.883812
AC009812.3	1.07918	-0.504162
C2orf70	0.0395906	-0.699306
DNAJB5	1.83345	-0.51767
HLA-DMA	1.38021	0.417585
AC007998.5	0.389076	-0.309263
KIF28P	-0.522879	-0.609411
TCF7L2	2.47177	0.378382
MMP25	0.66111	-0.656297
CHST5	0.811625	-1.57331
HIPK2	3.40816	0.729529
CDC34	2.66404	1.58422
CASC1	0.539591	-0.0223499
PLEKHA4	0.0395906	0.810683
AC010186.2	1.82222	0.398392
AC009229.2	-0.522879	-0.0390823
GPR156	1.14613	-0.215128
EXOC3L1	-0.522879	-0.277361
BOLA1	2.03741	0.890689
CYP4F26P	1.23417	-0.22391
AC104109.2	1.41497	-0.322106
DCTN2	2.94394	1.51172
YTHDC1	3.09889	1.09368
AGMAT	2.51396	-1.34951
TNFSF14	0.588046	-1.00198
CRISPLD2	2.04941	0.259886
RBM43	2.0016	0.577869
SESN2	2.32397	1.21389
PLXDC1	1.06029	-0.744218
FGD6	3.53371	0.786485
C2orf16	1.60808	-0.533373
CALML6	0.650515	-1.08425
DAPK1	3.30782	0.784818
AC007405.1	-0.522879	-0.78001
GPAT3	3.11587	0.852217
C1orf146	0.0395906	-1.07762
GLS2	-0.261439	-0.680105
TINCR	1.12764	1.15084
KCTD1	2.72414	0.551362
WDR63	0.0880456	-0.910821
SPEF2	2.19803	-0.602535
AC010761.3	1.52461	0.0872847
HIST1H2BF	1.45424	-0.329173
AC133785.1	-0.522879	-0.615022
AC092747.2	-0.522879	-0.826725
AC099521.1	0.30103	-0.69993
AC009950.1	0.811625	-0.963326
AC025031.5	1.49383	-1.32118
OR2B6	-0.522879	-0.86692
C1RL	2.4171	1.16261
B9D1	2.43603	0.710571
C15orf48	1.82222	-0.23486
IGF2BP3	3.03588	1.17181
ZNF131	2.86209	0.850728
TMCC3	1.22818	0.498974
SPECC1L	3.06868	0.94798
KLHL2P1	1.06029	-0.33507
DDB2	2.88237	0.945031
SPTSSA	2.87207	1.69875
MTRNR2L4	0.840621	-1.29792
AL590705.1	-0.522879	-1.05859
BHMT	-0.522879	-1.15759
MSH6	3.72369	1.03517
GOLGA6L10	1.59106	-0.408521
AC098614.1	2.96554	-0.40626
FRMD5	2.37733	-0.118572
AC091173.1	1.72818	-0.64015
KBTBD3	1.75926	-0.249915
TICAM2	0.650515	-1.4456
ORAI3	2.07999	0.305147
RNU2-22P	0.650515	-0.145255
U62317.2	-0.522879	-0.271092
WDR19	2.63875	0.761014
CPEB1	1.70749	-1.46708
RASSF5	1.69173	0.724425
HES7	0.811625	0.779807
RPL32	3.75405	2.30043
BBS1	2.34882	-0.789159
AC023043.4	0.954243	-0.0166282
PLD1	2.5144	0.307234
VTCN1	-0.522879	0.974135
FXN	2.13359	0.453669
AC008731.1	1.18829	-0.613901
DPH6-AS1	-0.522879	-0.353125
GDF9	0.811625	-0.767184
AL023775.1	2.00753	-1.13491
MTND1P8	0.874094	-0.970936
AL133353.1	0.127636	-0.433008
REXO5	2.3687	0.154706
ANO9	-0.0228787	0.742105
LINC00629	-0.522879	0.133315
LRRC56	-0.110924	0.441916
AC093274.1	0.90309	-1.22821
LINC00887	1.28055	0.0321096
AC027544.1	1.07306	-0.196023
FUOM	1.60914	0.826119
CFHR1	1.47712	-0.869062
AL627171.2	0.69897	0.136382
AL357033.1	-0.522879	-0.804121
ITGA6	3.47154	1.35444
SMCO4	1.73306	0.298409
AC130456.2	-0.110924	-0.310574
SPSB2	2.51677	1.06335
IRS2	2.55079	0.991037
PTPN14	2.99935	0.779687
AL109811.2	0.389076	-0.680731
HCG27	1.58877	-0.429525
FCRLB	1.23045	-0.214471
SCARF2	0.650515	-0.677584
FZD10	-0.522879	-0.327225
ABCA12	1.62545	0.669495
PFN4	1.48284	0.0550326
FAM120AOS	2.83014	1.28564
ARHGEF34P	0.389076	0.61208
CLIC1	3.4062	2.39765
PDK4	3.40693	0.263212
AC110285.1	-0.522879	-0.183718
EPCAM	1.84497	2.1048
NR2F2	2.23297	1.13059
ARHGEF5	0.0395906	0.73194
AC002470.1	-0.110924	-0.123829
PSMD10P2	1.25393	-0.0237638
CDH3	0.389076	1.35319
AC132219.1	-0.261439	-0.83168
RNU6-945P	0.389076	0.210394
AP002761.3	0.127636	-0.714756
HMOX1	2.8675	0.606622
URB1-AS1	1.67347	0.33945
AL356512.1	1.07918	-1.13317
LRRC37A9P	1.48726	-0.904883
AC009093.6	-0.522879	-0.380288
MAPK8IP1P2	0.66111	-0.568403
AC017104.5	0.943245	-0.117156
AC093484.2	-0.261439	-1.38757
AC025594.3	1.26317	-0.0844627
ADAM28	0.60206	-1.40773
LINC01694	0.738561	-0.618196
ST3GAL1P1	1.12764	-0.756917
SAPCD1	1.28469	-0.554802
AL139039.3	0.16111	-1.06166
NAPSA	1.19635	-0.562067
AL162411.1	1.70724	-0.422511
KRT20	0.627636	-1.1591
FNBP1P1	1.36008	-0.0651848
ZNF213-AS1	2.1731	0.269758
CD163L1	0.389076	0.547628
TSPO2	-0.522879	-0.787282
AC090515.2	1.11522	-0.356197
DHRS4L2	2.03142	0.906336
RAB34	3.20474	1.6236
AC231981.1	0.278151	-0.599728
MPV17	2.65865	0.916943
COL16A1	1.95943	0.0380296
TMEM200B	0.60206	0.657611
RBPMS-AS1	1.43017	-0.00307188
ZNF396	1.31774	-0.262169
RPS10P5	2.07088	-0.167236
AC005387.2	-0.522879	-0.362028
MIR580	-0.522879	0.0200162
MB21D2	2.59696	0.880129
DHRS4	2.39655	0.933305
PRMT9	2.48454	0.3496
SCO2	2.27905	-0.701633
ICA1	1.65311	0.967983
ABHD11-AS1	0.96214	0.612962
LINC01232	1.04139	0.083743
LINC00467	2.18274	0.891848
FAM66B	0.127636	-1.0092
AL157400.4	1.2297	-0.484005
LINC02166	0.0395906	-0.49142
IFIH1	1.72428	0.350117
LINC00634	-0.522879	-0.673625
AC027117.1	1.88601	-0.36157
IL1B	0.922549	0.0415006
AC007114.1	0.627636	0.714964
CDKL5	2.90113	0.0769435
VGF	1.85109	0.0590422
METTL27	1.90414	0.428022
CWC15	2.77379	1.11114
FAM57B	-0.522879	-0.604855
AC135506.1	-0.522879	-0.146746
TXN2	2.51983	1.6719
PRELP	-0.110924	-0.797553
ERRFI1	3.14926	1.97544
COX7C	3.18956	1.98161
PMP22	2.93789	0.25712
SLC39A1	3.07163	1.89007
LRAT	0.650515	-1.15786
MMP19	-0.522879	-0.237067
BCL10	2.50233	1.13254
EPHA10	1.53035	0.0859477
NALT1	1.28875	-0.21673
TECPR1	2.47897	0.371561
C11orf70	1.91705	-0.573853
CYP1B1	2.77499	1.81057
ART5	-0.522879	-0.770628
BCDIN3D-AS1	1.82433	-0.680469
BEAN1	1.26574	0.0476696
CCDC24	1.87717	0.848801
MYADM	3.13417	1.85519
RPL39L	2.65932	1.35856
NAT14	1.94194	1.69254
MYO1B	3.93343	1.09829
AC010168.2	1.91842	-0.350517
RASSF7	2.34093	1.25321
C17orf67	1.90964	-0.270724
ZNF843	0.0880456	-0.917851
FLVCR1	3.20322	0.440223
ALOX5	-0.0228787	1.64531
AC007388.1	1.91223	0.199402
AL121990.1	-0.522879	-0.92384
CRYM	1.58542	-1.72997
ZNF197	2.1519	0.266052
AL359962.1	-0.522879	0.00773132
APOL6	2.62144	0.757854
AC068580.3	2.09387	-0.361192
EVI5L	1.27995	0.859478
BTG1	3.04123	1.18036
LINC00514	1.0207	-0.146787
SFR1	2.52315	0.642856
HIST1H2AE	0.539591	-0.107213
VAMP1	1.97813	0.328844
AC114550.1	0.127636	-0.371607
LINC01273	1.37097	0.494861
ABCA1	2.67521	0.539958
CLEC2B	-0.110924	-0.939164
REST	3.17293	0.757696
AC093382.1	0.69897	-0.0155157
C2orf27A	1.32173	-0.932679
C1orf56	1.91161	0.279468
DCLK1	1.53073	-1.02408
AC007319.1	1.30103	-0.789805
STIM1	2.72331	1.1023
LINC01719	1.4965	-0.0277815
MORN1	2.43886	0.0313674
METRN	2.76782	1.20027
RN7SL689P	0.650515	0.128348
RHOA	3.72083	2.28212
LINC01572	1.89152	-0.689419
HCAR3	0.238561	0.291895
NUDT18	2.19409	0.566361
AC079148.1	0.0395906	-0.323767
AC104986.2	0.627636	0.343325
LITAF	3.21665	1.66431
ZBTB43	2.38177	0.539511
SLC34A1	0.0395906	-1.41622
AC105760.2	1.16007	-0.409101
OR7E102P	0	-0.458595
SLC27A1	1.93969	0.562685
TAF1A-AS1	1.15482	0.552064
AC012358.3	1.76985	-0.934375
LMBRD2	2.8881	0.826796
ADRA1B	1.90679	0.260112
NUDT6	2.13478	-0.261296
RGS7	0	0.451358
CCL20	1.25257	0.306548
ADAL	2.34149	0.301826
AC069257.1	-0.522879	-0.34397
VPS37D	1.70749	0.308274
AC004982.2	0.90309	0.51609
TRIM69	2.25606	0.0221585
AP006621.3	1.86	0.587244
C12orf80	0.66111	-0.735406
CD46	3.32952	1.93486
AC018638.1	1	-0.453029
FAM86C1	1.75814	0.344964
SNRPGP14	-0.522879	-0.333656
AC008747.1	-0.522879	-0.797675
SCEL	0.991136	1.04307
DCDC2	2.99889	-1.31685
SLC35E2B	2.62523	0.742353
AIMP2	2.89722	1.34187
AP3B2	0.150515	-1.17685
ARNTL	2.50432	0.453356
PUS10	2.33108	0.233836
RGS9BP	1.37018	-0.707031
ANKRD31	1.09656	-0.61494
AL662890.1	0.66111	-0.610868
ZBTB8A	2.23357	-0.197937
FAM86B2	-0.522879	-0.327623
AL353150.1	0.972241	0.504941
ANGPT1	1.42255	-0.180443
EPHA1	0.650515	1.05443
HMGA2	2.90275	0.534504
INTS3	3.08618	0.781916
FAM227B	1.43047	-0.619009
AL162231.2	1.21568	0.290219
DNAH10OS	1.53073	-0.902239
SEPT7-AS1	0.80103	-0.223493
AC244153.1	-0.522879	0.399059
AC138956.1	0.826606	-0.22032
AC022872.1	0.715682	-0.986206
DLG2	1.02461	-1.06829
SESN3	1.84949	-1.62538
AP002478.1	1.471	0.606943
RRP8	2.8642	0.423262
RPL17P11	1.19635	-0.146082
MYH15	0.951545	0.474497
AC005837.1	1.44041	-0.909902
LYRM9	1.38021	-0.770648
ATP1A2	-0.522879	-1.00835
TG	-0.522879	-1.8068
OPTN	2.87537	1.05564
AC004069.1	0.510595	-0.558492
LAMB1	3.92918	1.6191
NPEPPS	3.32298	1.16962
C10orf91	0.752575	-0.697797
PPM1B	3.09995	0.881769
AC027682.6	-0.0228787	-0.638143
AL442125.1	1.68692	0.268656
DDIT3	2.06565	1.09666
SPIRE1	2.69172	0.526158
RDH12	0.627636	-0.81166
AC016708.1	0.772034	-0.622423
GEMIN7	2.53548	0.337941
VPREB3	-0.522879	-0.0716839
AC074117.2	-0.522879	-0.41771
TMEM105	1.02461	0.442267
AL022322.1	1.20327	0.169531
H1FX	2.74638	1.32894
ALG1L9P	1.3451	-0.703056
HOXA9	0.738561	-0.133073
AC087645.2	0.190106	-0.0863864
C6orf136	1.91895	0.984096
OR1F1	0.477121	0.294339
ZC3H11A	2.9151	-1.60798
PPFIBP2	2.60146	0.436189
AC099336.1	1.09656	-1.28724
SMTNL1	-0.522879	-0.351269
AL451074.2	1.69635	-0.848529
LINC02449	0.690106	-0.349083
OSCP1	1.81924	0.742206
AL121772.1	1.22742	-0.742388
MORN4	1.92812	0.962922
AC008014.1	1.23417	0.108364
PKDCC	3.18656	-0.0583544
U73166.1	1.51771	-0.389613
STAC	2.04569	0.64164
FBXO48	2.05787	-0.143324
TJP2	2.31244	1.55559
SLC9A8	2.75344	0.860377
PPP1R3C	2.39134	-0.52916
GATA6-AS1	-0.522879	-1.0474
SMARCA2	3.22144	0.277084
CABLES1	2.32173	0.410806
F11R	3.00953	1.36924
ACTA2	1.76135	-0.770603
GPT2	2.47875	1.46633
AL512274.1	0.150515	0.389596
SNRNP27	2.54833	1.076
NME3	1.9903	1.49348
METTL3	3.08795	0.65627
AC010207.1	0.66111	-0.0305576
AC233266.2	0.752575	0.147842
LINC01238	-0.522879	-0.209998
MDH1B	1.44041	0.0166821
C2orf74	2.17377	-0.438918
PGPEP1	1.74791	0.913201
TRIM8	2.54362	1.56379
TP63	2.16333	0.228812
Z84485.1	-0.0228787	-0.183697
LINC01124	-0.522879	-0.160279
ST18	-0.522879	-1.67613
FRMD4B	1.26574	0.397745
PSMB9	1.82834	0.682683
C3orf67	1.95912	-0.754061
DHRS2	1.78439	0.860088
SNRPD2	3.41335	1.9401

[truncated: 1 more sheets: F_Correlation_UpPC9DownMLN]
