# Supplementary material for: ncRNAs Orchestrate Chemosensitivity Induction by Neddylation Blockades
Source: Cancers (Basel). 2024 Feb 18;16(4):825. doi: 10.3390/cancers16040825 (PMC10886669; doi:10.3390/cancers16040825)
Supplement: Supplementary file 1 [file cancers-16-00825-s001.zip › Source Data S4.xlsx]

## Sheet: A_RelNorExp_Genes
gene_name	FPKM_PC9_S			FPKM_PC9_Ap			FPKM_PC9GR			FPKM_PC9GR_Ap
KLF4	4.1457	4.4746	9.1575	12.1656	7.9998	13.5212	28.1575	20.3167	16.8983	32.0961	28.0375	27.0464
CDH2	0.9701	0.894	1.1059	1.4519	2.0457	1.5744	2.2894	2.3953	2.0466	1.2173	1.3548	1.6162
CDH1	44.2037	41.0394	46.7977	46.4131	44.2255	45.6766	44.0033	45.2017	45.4144	39.2211	40.6208	38.2428
VIM	0.0011	0.0011	0.0011	0.0216	0.0429	0.0114	0.0892	0.0535	0.1174	0.0992	0.1406	0.0977
ZEB2	0.0066	0.0011	0.0044	0.0067	0.0001	0.0118	0.0461	0.0442	0.0485	0.0455	0.0218	0.0303

## Sheet: A_UnpairedTTest
Table Analyzed	KLF4	KLF4	KLF4	CDH1	CDH1	CDH1	CDH2	CDH2	CDH2	VIM	VIM	VIM	ZEB2	ZEB2	ZEB2
Column B	PC9_Ap	PC9GR	PC9GR_Ap	PC9_Ap	PC9GR	PC9GR_Ap	PC9_Ap	PC9GR	PC9GR_Ap	PC9_Ap	PC9GR	PC9GR_Ap	PC9_Ap	PC9GR	PC9GR_Ap
vs.	vs.	vs.	vs.	vs.	vs.	vs.	vs.	vs.	vs.	vs.	vs.	vs.	vs.	vs.	vs.
Column A	PC9_S	PC9_S	PC9_S	PC9_S	PC9_S	PC9_S	PC9_S	PC9_S	PC9_S	PC9_S	PC9_S	PC9_S	PC9_S	PC9_S	PC9_S
Paired t test
P value	0.0842	0.0128	0.0005	0.4694	0.6439	0.0613	0.0215	0.0005	0.0374	0.0596	0.0098	0.0014	0.5939	<0.0001	0.016
P value summary	ns	*	***	ns	ns	ns	*	***	*	ns	**	**	ns	****	*
Significantly different (P < 0.05)?	No	Yes	Yes	No	No	No	Yes	Yes	Yes	No	Yes	Yes	No	Yes	Yes
One- or two-tailed P value?	Two-tailed	Two-tailed	Two-tailed	Two-tailed	Two-tailed	Two-tailed	Two-tailed	Two-tailed	Two-tailed	Two-tailed	Two-tailed	Two-tailed	Two-tailed	Two-tailed	Two-tailed
t, df	t=2.286, df=4	t=4.282, df=4	t=10.34, df=4	t=0.7983, df=4	t=0.4992, df=4	t=2.581, df=4	t=3.662, df=4	t=10.41, df=4	t=3.067, df=4	t=2.608, df=4	t=4.630, df=4	t=7.925, df=4	t=0.5786, df=4	t=20.85, df=4	t=4.006, df=4
Number of pairs
How big is the difference?	5.927	5.927	5.927	44.01	44.01	44.01	0.99	0.99	0.99	0.0011	0.0011	0.0011	0.004033	0.004033	0.004033
Mean of differences (B - A)	11.23	21.79	29.06	45.44	44.87	39.36	1.691	2.244	1.396	0.0253	0.0867	0.1125	0.0062	0.04627	0.03253
SD of differences	5.303 ± 2.320	15.87 ± 3.705	23.14 ± 2.238	1.425 ± 1.785	0.8595 ± 1.722	-4.652 ± 1.802	0.7007 ± 0.1913	1.254 ± 0.1204	0.4061 ± 0.1324	0.02420 ± 0.009280	0.08560 ± 0.01849	0.1114 ± 0.01406	0.002167 ± 0.003745	0.04223 ± 0.002025	0.02850 ± 0.007114
SEM of differences	-1.138 to 11.74	5.579 to 26.15	16.92 to 29.35	-3.530 to 6.380	-3.921 to 5.640	-9.656 to 0.3520	0.1695 to 1.232	0.9195 to 1.588	0.03852 to 0.7737	-0.001564 to 0.04996	0.03427 to 0.1369	0.07237 to 0.1504	-0.008231 to 0.01256	0.03661 to 0.04786	0.008748 to 0.04825
95% confidence interval	0.5664	0.8209	0.9639	0.1374	0.05864	0.6248	0.7703	0.9644	0.7017	0.6297	0.8427	0.9401	0.07722	0.9909	0.8005
R squared (partial eta squared)
How effective was the pairing?	1.053, 2, 2	4.236, 2, 2	1.099, 2, 2	6.713, 2, 2	14.37, 2, 2	5.822, 2, 2	8.530, 2, 2	2.774, 2, 2	3.563, 2, 2	Infinity, 2, 2	Infinity, 2, 2	Infinity, 2, 2	4.490, 2, 2	1.650, 2, 2	18.81, 2, 2
Correlation coefficient (r)	0.9744	0.3819	0.9531	0.2593	0.1301	0.2932	0.2099	0.53	0.4383	<0.0001	<0.0001	<0.0001	0.3643	0.7546	0.1009
P value (one tailed)	ns	ns	ns	ns	ns	ns	ns	ns	ns	****	****	****	ns	ns	ns
P value summary	No	No	No	No	No	No	No	No	No	Yes	Yes	Yes	No	No	No
Was the pairing significantly effective?

## Sheet: B_FullHM-MLN
CAT	10.021	10.5584	9.79116	10.3276
MAPK14	10.1293	9.40727	10.1254	10.7313
CYBB	3.58496	3.45943	2.80735	3.45943
CYP1A1	3.58496	3.32193	-1.73697	-1.73697
NQO1	14.2465	14.775	14.2107	14.6518
FOS	6.35755	6.44294	6.50779	5.39232
GCLC	12.0691	12.8516	11.7056	12.4569
GPX1	8.76155	9.36413	8.77149	9.09803
GPX3	7	6.80735	6.87036	6.08746
GSR	13.317	13.9291	13.3204	13.8601
HMOX1	10.0265	10.9099	9.28309	9.76818
JUNB	9.60918	10.0098	9.89785	10.6519
MAOA	4.32193	4.70044	4.80735	5.08746
MGST1	11.2668	11.6939	11.1923	11.4929
MT1X	7.59246	8.53138	7.73471	8.53138
NFE2L2	10.4909	10.9944	10.1712	10.7125
NFIX	6.04439	5.2854	6.59991	6.76818
NFKB1	9.92035	10.3432	9.99718	10.1306
MAPK10	6.08746	6.47573	5.20945	6.52356
SOD1	11.5632	11.9683	11.6506	12.1183
SOD2	9.65821	10.0875	9.24079	11.7164
SP1	11.2503	11.6036	10.9965	11.4666
TXNRD1	14.5011	15.073	14.4963	15.7194
XDH	5.70044	5.83289	6	5.88264
TXNRD2	8.31288	8.53528	8.29002	8.63662
TXN2	8.43879	8.57365	8.36632	8.37504
NOX1	3.80735	3	1	3.70044
UGT1A6	8.39232	8.40514	8.36194	8.24317
NOX5	1	1.58496	2	1.58496
ADAMTSL4-AS1	5.20945	6.24793	5.61471	5.2854
ATF2	10.2033	10.8408	10.3095	10.8114
BAK1	7.32193	7.66534	7.44294	7.7879
BAX	9.3966	10.1649	9.59619	10.2107
BCL2	6.89482	7.27612	7.40939	7.81378
BCL2L1	11.0901	11.3072	11.3537	11.4268
BCL2L11	8.60363	9.42206	8.67596	9.32193
BCL3	7.25739	8.03892	7.41785	7.90689
BID	9.56986	9.78953	9.50779	9.92333
BMF	2	3.70044	1.58496	3.45943
CCNA2	11.5454	12.1583	11.5953	12.2006
CCND1	12.8289	13.2239	12.9645	13.2713
CCNE1	8.62571	9.3015	9.35755	9.84078
CDKN1A	10.1662	10.7985	9.71939	10.3219
CFLAR	10.8642	11.318	11.0908	11.2052
EGFR	12.7848	12.9183	12.9163	12.9357
ELK1	8.94837	9.36851	9.10329	9.45943
FAS	8.19476	9.16239	8.30834	8.21432
FGF7	2	3.45943	3	3.80735
FOS	6.35755	6.44294	6.50779	5.39232
HBEGF	6.02237	6	6.56986	6.71425
HSP90AA1	15.0397	15.003	15.0944	15.5983
IL6	-1.73697	-1.73697	-1.73697	-1.73697
JUN	9.85643	9.92035	10.1599	10.1396
JUNB	9.60918	10.0098	9.89785	10.6519
MAP2K3	8.11374	7.88874	8.23362	8.00562
MAP2K4	10.611	11.1768	10.5651	11.2674
MAP2K6	8.78136	9.5812	8.47168	9.16491
MAP2K7	6.56986	7.08746	6.74147	7.31288
MAP3K5	7.85175	8.58496	8.13955	8.55459
MAPK11	6.71425	7.30378	6.96578	7.19967
MAPK12	8.09276	8.46761	8.05528	8.71425
MAPK13	3.90689	3.80735	2	2.58496
MAPK14	10.1293	9.40727	10.1254	10.7313
MAPK8	9.26679	9.71768	9.51964	9.88264
MCL1	11.9933	12.407	12.272	12.4494
MMP2	2.80735	3	3.45943	4.45943
NFE2L2	10.4909	10.9944	10.1712	10.7125
PDGFRA	3.45943	3.80735	2.80735	4.16993
RB1	10.611	11.0768	10.4988	11.0403
TNF	1.58496	-1.73697	-1.73697	-1.73697
TNFRSF1A	11.2544	11.8404	11.0485	11.5962
TNFSF10	2.58496	3	2.32193	3.16993
TP53	10.3376	10.3576	10.1163	10.8218
TRAF2	9.68475	9.81698	9.80574	10.0417
TRAF5	8.75489	9.35094	9.20701	9.62936
TRAF6	8.36632	9.14466	8.47978	9.19476
ABCC6	5.70044	6.65821	6.14975	6.32193
CES1	2.58496	3.45943	5.16993	3.80735
ABCC2	13.5164	14.4318	13.3009	13.9436
MAPK14	10.1293	9.40727	10.1254	10.7313
NQO1	14.2465	14.775	14.2107	14.6518
EPHX1	10.1886	10.6653	10.3095	10.6821
FOS	6.35755	6.44294	6.50779	5.39232
GCLC	12.0691	12.8516	11.7056	12.4569
GCLM	12.3276	12.9602	12.1396	12.6751
GSTP1	12.411	12.8386	12.4881	12.8992
HMOX1	10.0265	10.9099	9.28309	9.76818
JUN	9.85643	9.92035	10.1599	10.1396
NFE2L2	10.4909	10.9944	10.1712	10.7125
NQO2	9.26679	9.76321	9.224	9.80896
MAPK8	9.26679	9.71768	9.51964	9.88264
MAPK11	6.71425	7.30378	6.96578	7.19967
MAPK13	3.90689	3.80735	2	2.58496
MAPK12	8.09276	8.46761	8.05528	8.71425
ABCC3	12.7649	13.1977	12.6519	12.9613
ABCG2	10.8502	11.2246	10.7056	10.9701
KEAP1	10	10.6221	9.84078	10.3253
ABCC4	11.8118	12.3759	11.7343	12.0522
SRXN1	13.0558	13.6445	13.251	13.696
ASNS	9.68299	10.2935	9.69174	10.1997
ATF3	5.97728	5.93074	5.39232	6.82018
ATF4	11.3304	11.7928	11.4315	11.7545
ATF6	10.5459	11.0244	10.5265	10.9498
BBC3	6.35755	6.78136	6.04439	5.90689
BCL2L11	8.60363	9.42206	8.67596	9.32193
CALR	12.5656	13.0468	12.5071	13.0161
DDIT3	7.04439	7.40939	6.78136	6.94251
DNAJB11	10.1176	10.5546	10.1749	10.5718
DNAJB9	7.92481	8.90087	7.99435	8.71081
DNAJC3	10.9578	11.6307	10.9189	11.4858
EDEM1	9.96578	10.4737	10.23	10.6129
EIF2A	11.032	11.5608	11.0437	11.1254
EIF2AK3	9.62388	10.332	9.57743	10.102
ERN1	8.27146	8.76818	8.30834	8.83289
HSP90B1	13.8685	14.3401	13.8617	14.1963
HSPA5	12.3309	12.795	12.2784	12.7091
NARS1	11.9106	12.453	11.9894	12.4479
NFE2L2	10.4909	10.9944	10.1712	10.7125
PDIA6	12.933	13.5537	12.9257	13.3569
PPP1R15A	9.29232	9.62936	9.27612	9.35094
TRIB3	9.46352	9.76487	9.23362	9.2854
UBE2E1	10.4294	10.9359	10.3923	10.8186
WARS1	10.4898	10.7977	10.5216	10.6303
XBP1	10.0307	9.87805	9.86728	9.79928
KLF5	9.93074	10.5575	9.71253	9.92778
CEBPA	7.2854	8.0607	7.48382	7.96
CEBPB	8.87344	9.60918	8.80735	9.30834
CEBPD	7.63662	7.99435	7.50779	7.5157
CREB1	9.65105	10.0403	9.29462	10.9787
CTNNA1	12.8478	13.3334	12.7816	13.2792
DDIT3	7.04439	7.40939	6.78136	6.94251
EBF1	5.80735	7.18982	5.2854	6.06609
EGR2	-1.73697	3.16993	-1.73697	1.58496
MECOM	3.58496	4.39232	2.58496	3.32193
FOXO1	7.36632	7.48382	7.74147	7.7211
GATA2	5.16993	4.9542	5.52356	5.9542
GATA3	3.80735	2.80735	4.24793	4.32193
NR3C1	12.3753	13.213	11.9762	12.7887
INS	1.58496	-1.73697	-1.73697	-1.73697
IRF3	8.94544	9.45943	8.93074	9.59619
IRF4	-1.73697	-1.73697	-1.73697	-1.73697
PPARG	9.36632	9.88722	9.22882	9.64024
RARA	8.37069	8.76818	8.76155	8.65821
RORA	7.34873	8.16993	7.98299	7.76155
SREBF1	10.4717	10.7125	10.5727	10.7993
STAT5A	7.53916	7.50779	7.2384	7.07682
STAT5B	10.218	10.7372	10.3805	10.7322
NR2F2	8.01123	8.12412	7.40088	7.43463
TLE3	8.54303	9.33762	9.14975	9.23601
WNT10B	5.08746	5.61471	5.83289	6.26679
KLF4	7.01123	8.13955	6.33985	7.17991
NR1H3	7.07682	7.85798	7.10852	7.65821
KLF2	4.58496	5.08746	4	3.45943
ZNF423	1.58496	1	1	2
KLF15	-1.73697	-1.73697	1.58496	-1.73697
TCF7L1	4.52356	4.58496	4.45943	6.08746
APC	10.7262	10.6883	9.40727	10.5265
RHOA	12.3168	12.736	12.2258	12.4949
CCND1	12.8289	13.2239	12.9645	13.2713
CCND2	-1.73697	1.58496	-1.73697	2.32193
CCND3	11.1997	10.5088	10.1749	10.7065
CD44	12.8045	13.0651	12.8265	11.5187
CREBBP	10.0607	10.3696	10.2348	10.4717
CSNK1E	9.82018	9.92926	9.95274	10.1674
CTBP1	10.3231	10.774	10.1997	10.5859
CTBP2	10.6733	11.1668	10.7607	11.1687
CTNNB1	12.5651	13.3998	12.6872	13.2122
CTNND1	11.4686	12.0004	12.1167	11.9177
DVL1	9.6987	10.2033	10.1774	10.5118
DVL2	9.38802	9.98868	9.45943	9.99718
DVL3	8.78463	9.17991	9	9.29462
EP300	10.3718	10.6239	10.352	10.6812
ESRRB	2.58496	1.58496	2	1
FZD2	8.07682	8.70044	8.15482	8.75489
GSK3B	10.5382	10.9708	10.5565	10.9001
JUN	9.85643	9.92035	10.1599	10.1396
LDLR	9.58871	9.91737	9.84392	10.1124
LRP6	11.9897	12.6985	12.0137	12.5483
LRP5	9.94105	10.2324	10.062	10.2312
MMP7	10.2312	10.3674	10.0674	10.1636
MYC	10.6944	9.99718	10.7499	11.0279
NFYA	8.57743	9.50383	9.00282	9.29462
PAFAH1B1	11.8494	12.4805	11.8198	12.2712
PLAU	10.4594	10.8757	10.4491	10.7056
POU5F1	4.90689	6.14975	5.75489	6.20945
PPARD	6.33985	6.98868	6.85798	7.43463
PPP2CA	11.73	12.3551	11.8037	12.2747
PPP2CB	10.4398	11.0077	10.5661	10.9809
PPP2R1A	11.7859	12.1328	11.7891	12.0997
PPP2R1B	10.2854	10.7805	10.5699	10.8727
PPP2R2A	10.1737	10.5897	10.3476	10.2372
PPP2R2B	2.58496	3.32193	3	3
PPP2R2C	9.15987	8.61839	9.25974	9.44087
PPP2R3A	8.20457	8.79442	8.37069	8.92481
PTPA	10.813	11.3783	10.9106	11.3376
PPP2R5C	10.8895	11.0258	10.4988	10.9069
PPP2R5E	10.2831	10.6421	10.1059	10.4594
PRKCA	11.4089	11.7194	11.2174	11.577
PRKCB	2.58496	3.58496	3.45943	2.80735
PRKCD	4.80735	5.49185	5.72792	5.75489
PRKCE	8.29462	8.99152	8.34873	9.05528
PRKCG	-1.73697	2.58496	-1.73697	3
PRKCH	6.93074	6.82018	7.55459	7.73471
PRKCI	9.67243	10.3354	9.8933	10.2515
PRKD1	6.91886	7.32193	7.07682	7.53138
PRKCQ	7.32193	8.07682	7.82018	8.19476
PRKCZ	6.80735	7.40088	7.09803	7.44294
MAPK9	9.73302	10.058	9.88417	10.2095
MAPK10	6.08746	6.47573	5.20945	6.52356
MAP2K4	10.611	11.1768	10.5651	11.2674
SOX2	6.24793	6.6865	4.52356	4.85798
MAP3K7	9.96	10.4929	10.1267	10.4696
TCF7	7.55459	8.41785	8.18488	8.37504
TCF7L2	8.224	8.49586	8.11374	8.30834
TP53	10.3376	10.3576	10.1163	10.8218
WNT2	-1.73697	-1.73697	-1.73697	-1.73697
WNT3	7.64386	8.53138	7.74819	8.43879
WNT5A	6.76818	7.3837	6.96578	7.49185
WNT6	-1.73697	-1.73697	-1.73697	-1.73697
WNT7A	-1.73697	-1.73697	1.58496	3
WNT7B	10.4717	10.3343	10.5008	10.3934
WNT10B	5.08746	5.61471	5.83289	6.26679
WNT11	3.16993	2.80735	3	3.58496
WNT2B	4.75489	4.85798	4.85798	4.9542
WNT9B	-1.73697	-1.73697	-1.73697	-1.73697
FZD5	9.67596	10.115	9.34207	9.85331
FZD3	9.71596	10.3531	10.0861	10.6055
FOSL1	8.25267	7.85175	8.45533	8.49185
AXIN1	9.45327	9.58684	9.29921	9.8009
AXIN2	7.99435	9.42417	7.47573	9.05257
FZD1	7.08746	7.59246	7.33092	7.90689
FZD4	7.86419	7.74147	7.42626	8.47573
FZD6	9.49785	10.6475	10.2264	10.7134
FZD7	7.82655	8.3443	8	8.50779
FZD8	8.29921	8.89482	8.34873	8.76818
FZD9	4.39232	5.24793	5.24793	5.80735
ZBTB33	9.80252	10.4574	9.82018	10.4747
FRAT1	4.16993	5.24793	4.64386	4.9542
FZD10	-1.73697	1	-1.73697	-1.73697
FBXW2	11.0993	11.6804	11.144	11.6321
FOXD3	4.08746	3.32193	2.80735	4.16993
PPP2R3B	7.54689	8.25739	7.70044	7.97154
RACGAP1	11.2288	11.9432	11.2533	11.7632
WNT16	-1.73697	2.58496	2.58496	3
NLK	9.69349	10.2009	9.67948	10.1898
WNT4	5.61471	6.08746	5.67243	6.10852
NANOG	-1.73697	-1.73697	1.58496	-1.73697
WNT5B	3	3.90689	2	4.45943
TCF7L1	4.52356	4.58496	4.45943	6.08746
NKD1	6.47573	6.83289	6.80735	7.99435
NKD2	5	5.61471	5.49185	6.10852
WNT3A	-1.73697	-1.73697	-1.73697	-1.73697
LRRK2	9.97441	10.8502	9.41574	10.1861
PPM1J	2.80735	3.32193	4	4.16993

## Sheet: C_Cluster-MLN
Gene ID	Control_1	Control_2	MLN4924_1	MLN4924_2
CYP1A1	12	10	0.3	0.3
HBEGF	65	64	95	105
JUN	927	969	1144	1128
MAPK13	15	14	4	6
FOXO1	165	179	214	211
STAT5A	186	182	151	135
NR2F2	258	279	169	173
PRKCH	122	113	188	213
SOX2	76	103	23	29
PPM1J	7	10	16	18

## Sheet: D_FullHM-PC9
Gene ID	PC9_S1	PC9_S2	PC9_S3	PC9GR_1	PC9GR_2	PC9GR_3
CAT	4.1724	4.09213	3.97518	4.11905	4.32331	4.30547
MAPK14	3.67698	3.67855	3.55182	3.90304	3.8397	3.80212
CYBB	-2.88146	-2.86183	-3.3218	-3.45732	-2.32559	-4.32791
CYP1A1	-4.97618	-3.63462	-2.63515	-2.19952	-2.26044	-4.37823
NQO1	8.84249	8.92286	8.78101	8.04358	8.1181	8.21228
FOS	3.42418	3.35267	3.65951	5.07018	4.79056	4.3888
GCLC	2.86762	2.91377	3.11492	2.55407	2.45937	2.56091
GPX1	6.50628	6.56488	6.62288	7.25889	7.15553	6.96704
GPX3	-1.15672	-1.3781	-1.66814	2.32758	2.41081	2.3407
GSR	6.88714	6.88941	6.72336	6.26751	6.3391	6.43931
GSTT2	-2.43953	-1.61255	-1.25052	0.494659	0.663229	-0.178624
HMOX1	1.87795	1.83385	1.82398	2.0237	2.13083	1.89093
JUNB	6.29058	6.37134	6.74597	6.79202	6.61282	6.49959
MAOA	-2.4927	-2.39506	-1.68933	-1.33848	-1.36192	-1.52036
MGST1	6.60384	6.72815	6.58401	6.36402	6.44266	6.58848
MT1X	-1.70013	-2.00243	-1.09607	-1.48641	-1.30632	-2.68715
NFE2L2	4.22915	4.41879	4.65907	4.94565	4.73938	4.60953
NFIX	2.26207	2.12215	2.3197	2.07941	2.16925	1.82309
NFKB1	2.68809	2.76138	2.66157	1.60556	1.99733	2.09349
MAPK10	-2.31142	-2.63575	-1.6088	-3.82017	-4.09259	-4.34283
SOD1	6.16336	6.17535	5.82987	5.97065	6.05372	6.0184
SOD2	3.17252	3.10397	3.553	2.17369	2.43683	2.65447
SOD3	0.442556	0.904194	0.863013	0.572209	0.939391	0.727619
SP1	4.65266	4.60126	4.88949	4.86052	4.86017	4.74547
TXNRD1	8.34921	8.37193	8.24316	7.38595	7.35461	7.32471
XDH	1.20466	1.23556	1.98428	2.21133	2.408	2.47831
TXNRD2	1.59637	1.4757	1.29664	1.52885	1.43669	1.51956
TXN2	5.30476	5.35229	5.36314	5.56838	5.60797	5.4854
NOX1	-1.44697	-1.70745	-1.70798	-2.87326	-2.93417	-2.52145
UGT1A6	1.59105	1.72694	1.63515	0.507395	0.889427	0.944011
NOX5	-1.11307	-1.49943	-1.46435	-2.03686	-2.18183	-1.92112
ADAMTSL4-AS1	-3.58653	-2.75955	-2.56744	-2.05089	-2.1118	-1.87311
ATF2	2.97032	2.97415	3.27383	3.36776	3.28573	3.13723
BAK1	3.39687	3.4333	3.39898	4.47646	4.50063	4.43498
BAX	4.748	4.73094	4.44347	4.63964	4.6466	4.6638
BCL2	-2.54284	-2.1477	-2.7332	-2.15252	-1.87901	-2.41738
BCL2L1	5.36212	5.34193	5.32347	5.7554	5.58021	5.30953
BCL2L11	3.12839	3.09711	3.21355	2.36685	2.42197	2.55776
BCL3	4.01714	3.89341	3.98432	3.85942	3.60838	3.46453
BID	4.01685	4.10067	3.88625	3.6272	3.81031	3.96153
BMF	2.64407	2.5706	3.31588	2.60731	2.37397	2.10637
CCNA2	4.55336	4.49419	4.12999	4.01617	4.60183	5.02534
CCND1	6.56639	6.50539	6.55472	6.02433	6.00428	5.96242
CCNE1	1.85452	1.86559	1.04259	2.51284	2.1763	2.47785
CDKN1A	3.13784	3.16332	3.64068	3.92975	3.68433	3.25543
CDKN2A	5.50828	5.47626	5.54406	5.28053	5.14107	5.09969
CFLAR	1.49901	1.47471	1.85308	1.22269	1.22961	1.21367
EGFR	5.9854	5.92935	6.02254	6.4733	6.35881	6.2823
ELK1	2.99073	2.92945	3.00106	3.04344	3.00312	2.98907
FAS	-0.998945	-0.805282	-0.907701	-0.018309	-0.079221	0.343347
FOS	3.42418	3.35267	3.65951	5.07018	4.79056	4.3888
HBEGF	1.28736	1.11282	3.39203	3.7359	3.59871	3.41335
HSP90AA1	9.26558	9.33088	8.80714	8.40721	8.675	8.95423
IL6	-2.92287	-3.22517	-3.64074	-0.361231	0.414358	0.549544
JUN	3.49608	3.44296	3.62153	4.86717	4.52414	4.19304
JUNB	6.29058	6.37134	6.74597	6.79202	6.61282	6.49959
MAP2K3	4.46203	4.30298	4.32891	4.50771	4.51829	4.57619
MAP2K4	3.36645	3.44498	3.30308	2.82117	2.79879	2.88382
MAP2K6	-0.488648	-0.9083	-1.01012	-1.09051	-0.240686	-0.289798
MAP2K7	3.04459	3.02093	2.93579	3.61915	3.49106	3.48875
MAP3K5	3.25219	3.12432	3.17797	1.41018	1.46791	1.37031
MAPK11	1.82881	1.43066	1.99661	2.02367	1.61207	1.21076
MAPK12	1.75762	1.72698	1.74928	1.4895	1.35128	1.1392
MAPK13	4.60914	4.54765	4.65002	5.00414	4.95895	4.75395
MAPK14	3.67698	3.67855	3.55182	3.90304	3.8397	3.80212
MAPK8	2.47926	2.43443	2.53169	2.17329	2.19229	2.2519
MCL1	5.90679	5.9661	6.04951	6.429	6.23595	6.15089
NFE2L2	4.22915	4.41879	4.65907	4.94565	4.73938	4.60953
RB1	3.13765	3.1161	3.08236	2.95748	2.81278	2.81961
TNF	0.759552	0.471062	0.936187	0.135325	0.500678	1.51504
TNFRSF1A	5.38917	5.19429	5.29259	5.5079	5.36694	5.24838
TNFSF10	1.35668	1.41129	1.20695	-2.10848	-2.27631	-1.8916
TP53	5.4653	5.37199	5.42842	4.84928	4.91306	4.88042
TRAF2	2.94792	2.69893	2.64369	2.77881	2.78246	2.98575
TRAF5	-2.72546	-2.44279	-2.35022	-1.0077	-1.39982	-1.62841
TRAF6	1.9997	2.0513	2.23945	1.8153	1.58507	1.71777
ABCC6	-2.79404	-1.81093	-2.34199	-2.2324	-2.29331	-1.85506
CES1	3.52592	3.41408	3.33497	3.21779	3.53422	3.87195
ABCC2	6.26838	6.30253	5.98079	4.51445	4.77733	5.10075
MAPK14	3.67698	3.67855	3.55182	3.90304	3.8397	3.80212
NQO1	8.84249	8.92286	8.78101	8.04358	8.1181	8.21228
EPHX1	8.44635	8.33269	8.32463	7.15163	7.00144	6.97414
FOS	3.42418	3.35267	3.65951	5.07018	4.79056	4.3888
GCLC	2.86762	2.91377	3.11492	2.55407	2.45937	2.56091
GCLM	6.02249	6.11361	5.83898	4.35943	4.45328	4.6596
GSTP1	9.31871	9.3046	9.2424	8.86577	8.94835	8.99823
HMOX1	1.87795	1.83385	1.82398	2.0237	2.13083	1.89093
JUN	3.49608	3.44296	3.62153	4.86717	4.52414	4.19304
NFE2L2	4.22915	4.41879	4.65907	4.94565	4.73938	4.60953
NQO2	1.91897	1.99685	1.6367	1.8672	1.8717	1.76608
MAPK8	2.47926	2.43443	2.53169	2.17329	2.19229	2.2519
MAPK11	1.82881	1.43066	1.99661	2.02367	1.61207	1.21076
MAPK13	4.60914	4.54765	4.65002	5.00414	4.95895	4.75395
MAPK12	1.75762	1.72698	1.74928	1.4895	1.35128	1.1392
ABCC3	6.19732	6.08598	6.4299	5.58388	5.54635	5.41442
ABCG2	3.85766	4.03321	3.74674	3.96928	4.21093	4.44361
KEAP1	5.44376	5.31513	5.18765	4.19805	4.2246	4.31963
ABCC4	4.44817	4.46596	4.64659	1.8352	2.0022	2.20328
SRXN1	-4.04279	-2.14869	-3.28673	-4.55154	-3.61246	-2.44485
ASNS	2.2449	2.41318	5.81787	6.70934	6.15837	5.25602
ATF3	-2.75079	-1.54673	0.56376	1.71774	1.44894	1.13368
ATF4	7.92381	7.92253	8.59932	8.56159	8.48504	8.41074
ATF6	2.71133	2.83101	3.20952	2.54057	2.48146	2.45364
BBC3	1.97431	1.88266	2.34896	2.30408	2.45875	2.5447
BCL2L11	3.12839	3.09711	3.21355	2.36685	2.42197	2.55776
CALR	8.09238	8.04746	7.6833	7.25431	7.52733	7.77998
DDIT3	0.67331	1.00705	2.72136	3.96213	3.50706	3.45983
DNAJB11	3.22346	3.29224	3.43372	2.94088	2.9517	3.19011
DNAJB9	1.69209	2.01289	2.31886	2.53585	2.09643	2.02011
DNAJC3	3.29113	3.2294	3.48605	2.47939	2.38345	2.54103
EDEM1	3.45055	3.40144	3.6684	4.55786	4.51457	4.32906
EIF2A	5.33931	5.41118	5.6689	5.47184	5.43606	5.41268
EIF2AK3	1.54699	1.83296	1.53096	1.54686	1.1912	1.40853
ERN1	0.390557	0.324798	1.28864	0.881807	0.72668	0.87946
ERP27	1.44442	1.23169	1.28612	3.72847	3.19191	2.83775
HSP90B1	7.19563	7.27816	7.19608	6.468	6.53613	6.68534
HSPA5	7.13132	7.07892	7.42261	7.01524	6.89021	6.79265
NARS1	5.39261	5.4012	5.82353	5.60432	5.27653	5.08286
NFE2L2	4.22915	4.41879	4.65907	4.94565	4.73938	4.60953
PDIA6	5.55891	5.52968	5.44591	5.43355	5.49125	5.69627
PPP1R15A	4.16381	4.17633	4.83627	5.66285	5.52805	5.29074
TRIB3	5.84522	5.81578	6.79676	6.65	6.48067	6.2952
UBE2E1	5.05823	5.20787	5.42288	5.21878	5.11893	4.99547
WARS1	3.43133	3.40431	4.28007	5.14251	4.62558	3.76693
XBP1	5.88745	5.82624	6.71972	7.05944	7.04205	7.08622
KLF5	5.47124	5.44972	5.64821	5.15009	5.14222	5.1277
CEBPA	2.04515	1.88759	1.58749	1.45052	1.46822	1.9761
CEBPB	5.33208	5.6074	5.5171	5.77353	5.53628	5.87643
CEBPD	1.03868	0.700763	1.04007	1.23308	1.49085	1.27908
CREB1	2.15957	2.24045	2.34532	2.21166	2.17303	2.17439
CTNNA1	2.72781	2.73935	3.14434	3.61445	3.47954	3.35945
DDIT3	0.67331	1.00705	2.72136	3.96213	3.50706	3.45983
EGR2	-1.99163	-3.25211	-2.60057	-0.543451	-0.778392	-1.06611
MECOM	0.726316	0.608968	1.0292	-1.00221	-1.06313	-0.959834
FOXO1	1.9621	1.8207	1.9941	1.52605	1.51513	1.38199
GATA2	4.88283	4.76376	4.73864	4.42753	4.50977	4.69794
GATA3	3.37383	3.32657	3.39991	4.0272	3.97409	3.85344
NR3C1	2.26332	2.44031	2.52384	2.58699	2.76431	2.7166
IRF3	5.0856	5.00465	4.8064	5.46887	5.39855	5.38775
PPARG	4.81968	4.87605	4.68555	3.89314	3.77448	3.80484
RARA	2.37577	2.18895	2.13567	2.3593	2.20665	1.93692
RORA	-5.96479	-5.09716	-3.74406	-3.96258	-3.74786	-4.18627
SREBF1	5.42627	5.24516	5.19096	4.30383	4.40509	4.57534
STAT5A	-0.277488	-0.434012	-0.326298	-1.05926	-1.41973	-1.75325
STAT5B	2.41929	2.37831	2.28435	2.08046	2.27801	2.2706
NR2F2	2.95831	3.08228	2.99145	3.64949	3.75383	3.8639
TLE3	2.5638	2.47628	2.64073	1.2407	1.33512	1.46166
WNT10B	-1.00542	-0.616551	-0.92743	0.213754	0.307564	0.203963
KLF4	2.05163	2.16177	3.19495	4.81545	4.34459	4.07881
NR1H3	2.81596	2.90304	2.91422	3.28672	3.05682	2.72941
KLF2	-0.453905	-0.665597	-0.235502	-0.225688	-0.2866	-0.108346
TCF7L1	1.76008	1.89113	1.60595	2.83102	2.80663	2.80174
APC	1.43401	1.39387	1.40548	0.929933	0.950705	1.06285
RHOA	7.51996	7.57746	7.35975	7.59899	7.60971	7.53443
CCND1	6.56639	6.50539	6.55472	6.02433	6.00428	5.96242
CCND3	4.91864	4.83073	4.30557	3.32679	3.4377	3.50095
CD44	5.53284	5.45436	5.76223	6.02659	6.17526	6.29615
CREBBP	2.64347	2.47672	2.77441	1.96581	2.11983	2.15253
CSNK1E	3.97898	3.96055	4.07436	3.97128	3.74636	3.59204
CTBP1	2.32166	2.39127	2.43903	2.03584	2.08443	2.14576
CTBP2	2.36023	2.36861	2.66666	2.63503	2.66746	2.70129
CTNNB1	5.36488	5.29669	5.2541	4.67888	4.8654	4.97424
CTNND1	5.79962	5.75654	5.95927	5.853	5.76291	5.67977
DVL1	4.42742	4.37022	4.40762	4.93702	4.80774	4.71077
DVL2	3.33734	3.35405	2.97923	3.47204	3.34094	3.39899
DVL3	4.62658	4.63042	4.44981	4.83853	4.76278	4.696
EP300	3.05206	2.91885	3.12115	2.61912	2.65536	2.63474
FZD2	3.2053	3.29975	3.31827	4.16149	3.94295	3.99354
GSK3B	4.30041	4.18298	4.36904	4.53256	4.44771	4.42429
JUN	3.49608	3.44296	3.62153	4.86717	4.52414	4.19304
LDLR	4.80756	4.66344	4.29707	3.23704	3.68339	3.88918
LRP6	2.44422	2.38624	2.67386	2.57804	2.4284	2.49994
LRP5	5.50978	5.36638	5.78338	4.61678	4.62236	4.64395
MYC	4.9415	4.82516	5.06354	5.4132	5.2619	4.98489
NFYA	3.68454	3.60956	3.63621	3.60481	3.45532	3.44728
PAFAH1B1	3.98231	3.92968	4.03592	4.12324	4.1192	4.05296
PLAU	3.9525	3.84237	4.76236	3.77496	3.6381	3.70349
POU5F1	-1.64246	-1.46237	-2.71083	-2.48379	-2.71463	-2.54702
PPARD	3.38615	3.27502	3.23891	3.15473	2.94181	2.98072
PPP2CA	4.95637	5.09255	5.07748	5.13042	5.06531	5.04696
PPP2CB	3.79776	3.88951	3.81811	4.18306	4.03025	3.93784
PPP2R1A	5.86343	5.7544	5.65067	5.25505	5.40878	5.3928
PPP2R1B	2.0641	2.19425	1.93275	1.38455	1.53858	1.54844
PPP2R2A	3.80095	3.80832	4.01332	3.626	3.48152	3.5308
PPP2R2C	2.38745	2.57227	2.02492	2.34968	2.3375	2.32488
PPP2R3A	2.62987	2.63318	2.49858	2.75397	2.74547	2.80101
PTPA	5.13909	5.01077	5.12767	4.6805	4.76403	4.80125
PPP2R5C	4.36096	4.42495	4.45145	4.68579	4.63118	4.56572
PPP2R5E	3.84875	3.92494	3.73135	2.76008	2.77197	2.81089
PRKCA	2.44644	2.3971	2.55589	1.38411	1.64627	1.60701
PRKCD	4.22145	4.09748	4.13085	3.12214	3.34331	3.2307
PRKCE	0.160876	0.403916	0.790758	1.26175	0.94547	0.798543
PRKCG	-2.95332	-2.02679	-1.34926	0.312722	0.454303	0.58323
PRKCH	1.55605	1.74156	1.67468	1.45854	1.18036	0.991627
PRKCI	4.61437	4.66772	4.62131	4.6149	4.60861	4.72417
PRKD1	-0.248838	-0.10819	0.00291637	-1.24663	-1.468	-1.65089
PRKCQ	-1.10879	-0.852118	-0.942854	0.56946	0.525422	0.40062
PRKCZ	0.289169	0.333893	0.413973	0.936215	0.681034	0.95039
MAPK9	3.42116	3.47806	3.32765	3.38831	3.41413	3.53094
MAPK10	-2.31142	-2.63575	-1.6088	-3.82017	-4.09259	-4.34283
MAP2K4	3.36645	3.44498	3.30308	2.82117	2.79879	2.88382
SOX2	-2.94031	-2.69829	-2.33626	-3.12714	-3.50998	-1.6054
MAP3K7	3.43455	3.52592	3.54537	3.08359	2.93902	2.95382
TCF7	-3.20493	-3.04779	-3.60087	-4.86568	-3.51155	-3.19194
TCF7L2	0.965131	1.06056	1.41119	1.18915	1.36675	1.21497
TP53	5.4653	5.37199	5.42842	4.84928	4.91306	4.88042
WNT3	1.54642	1.64471	1.94115	1.55255	1.36195	1.44961
WNT5A	5.05386	5.05965	5.15606	0.516969	1.06692	1.6026
WNT6	3.19593	3.26026	2.77625	3.01314	2.934	3.42408
WNT7A	-1.22097	-0.538376	0.0876269	1.72971	1.70655	1.22942
WNT7B	5.76333	5.59996	5.58206	4.47821	4.44576	4.41571
WNT10B	-1.00542	-0.616551	-0.92743	0.213754	0.307564	0.203963
WNT11	-2.28958	-2.11794	-2.44041	-2.57593	-1.74376	-1.98709
WNT2B	-2.48919	-2.04575	-2.0203	-1.64125	-1.90071	-3.13332
FZD5	2.2456	2.23776	2.09137	1.31934	1.28301	1.39766
FZD3	-0.1932	-0.147689	-0.0371963	0.430501	0.214108	0.145623
FOSL1	4.63287	4.44877	4.70155	5.18946	5.12614	4.86969
AXIN1	2.83196	2.74434	2.74539	3.17318	3.14987	3.09388
AXIN2	-0.0580111	-0.0227815	-0.103048	-4.50536	-4.56627	-4.24666
FZD1	0.223594	0.354975	-0.0222848	0.658067	0.454355	0.571997
FZD4	0.541979	0.314599	0.752802	-0.434004	-0.270356	-0.272674
FZD6	4.39098	4.44347	4.54144	3.95381	4.031	4.07811
FZD7	2.66004	2.3991	2.70789	1.93774	1.92649	1.63044
FZD8	-2.74721	-3.86508	-3.3802	-4.54547	-4.19134	-3.6087
FZD9	-3.42114	-2.81655	-5.40205	-1.53757	-1.59848	-2.40816
ZBTB33	4.10885	4.17828	4.39027	3.82065	3.6507	3.61461
FRAT1	0.937845	1.22567	1.1457	0.175339	-0.0314237	0.456064
FZD10	-2.74052	-3.08345	-2.08399	-0.976247	-1.08778	-1.19702
FBXW2	3.1292	3.13841	3.22982	2.99601	2.87185	2.8393
PPP2R3B	-0.0106414	0.151285	0.0346047	0.566001	0.729257	0.694639
RACGAP1	4.64401	4.69006	4.09627	4.17505	4.47386	4.74412
LEF1	-1.81101	-1.74075	-2.27735	-4.54215	-4.28114	-4.60538
NLK	1.9439	1.92432	2.23694	1.29086	1.31703	1.49067
WNT4	-0.164968	-0.145335	0.152467	-0.806355	-1.03719	-0.96912
WNT10A	1.48473	1.30108	1.36549	0.535994	0.63378	0.840916
WNT5B	0.868046	0.550644	0.575196	0.594513	0.558912	0.311017
TCF7L1	1.76008	1.89113	1.60595	2.83102	2.80663	2.80174
NKD1	-5.99702	-4.29932	-4.2124	-4.92081	-4.21619	-3.84654
NKD2	-1.91708	-2.24537	-1.70534	0.133136	0.148845	-0.502
WNT3A	-0.321486	-0.920763	-0.302392	-3.34961	-1.48452	-1.56484
PPM1J	-1.91157	-1.45137	-2.2404	0.566741	-0.118662	-0.18238

## Sheet: E_Cluster-PC9
Gene ID	PC9_S1	PC9_S2	PC9_S3	PC9GR_1	PC9GR_2	PC9GR_3
ABCC4	21.829	22.0998	25.0475	3.56822	4.0061	4.60525
APC	2.70196	2.62782	2.64906	1.90519	1.93282	2.08905
BAK1	10.5332	10.8026	10.5486	22.2613	22.6373	21.6303
BCL2L11	8.74458	8.55701	9.27632	5.15812	5.35902	5.88794
CCND1	94.7723	90.8487	94.0087	65.0885	64.1901	62.3544
EPHX1	348.824	322.396	320.6	142.185	128.127	125.726
GPX3	0.448531	0.384726	0.314659	5.01962	5.31772	5.06548
KEAP1	43.5248	39.812	36.4451	18.3543	18.6953	19.9682
KLF4	4.14573	4.47464	9.15749	28.1575	20.3167	16.8983
MAP3K5	9.52813	8.71993	9.05033	2.6577	2.76621	2.58526
NOX1	0.366791	0.306202	0.306087	0.136478	0.130836	0.174168
NR2F2	7.77215	8.46953	7.95274	12.5489	13.4901	14.5596
PPP2R3B	0.992651	1.11056	1.02428	1.48041	1.65778	1.61848
PRKCA	5.45068	5.26745	5.88028	2.61011	3.13023	3.04621
PRKCD	18.6545	17.1184	17.5191	8.70676	10.1493	9.38724
PRKCG	0.129111	0.2454	0.392493	1.24205	1.37012	1.4982
PRKCQ	0.463683	0.553971	0.520203	1.48397	1.43935	1.32007
SREBF1	43.0001	37.9271	36.5289	19.7507	21.1867	23.8405
TCF7L1	3.38717	3.70927	3.04397	7.11576	6.99649	6.97279
TLE3	5.91264	5.56459	6.23649	2.36313	2.52297	2.75425
TP53	44.1795	41.4124	43.0644	28.8256	30.1286	29.4545
WNT10A	2.79864	2.46413	2.57664	1.44994	1.55163	1.79119
WNT10B	0.498126	0.652228	0.525794	1.1597	1.23762	1.15186
WNT5A	33.2173	33.3509	35.6557	1.43095	2.09496	3.03691
WNT7B	54.3171	48.5017	47.9034	22.2882	21.7925	21.3433
