# Supplementary material for: ncRNAs Orchestrate Chemosensitivity Induction by Neddylation Blockades
Source: Cancers (Basel). 2024 Feb 18;16(4):825. doi: 10.3390/cancers16040825 (PMC10886669; doi:10.3390/cancers16040825)
Supplement: Supplementary file 1 [file cancers-16-00825-s001.zip › Source Data S5.xlsx]

## Sheet: F6_down-pc9gr_up-a549_mirnas
mirna	log2FoldChange	antilog10pval	expression	data
MIR5194	-2.58586	1.37591	Down	PC9GR
MIR6512	-2.40256	0.910526	Down	PC9GR
MIR5581	-2.39045	1.21763	Down	PC9GR
MIR200A	-2.01295	3.03886	Down	PC9GR
MIR429	-1.76652	2.61255	Down	PC9GR
MIR1249	-1.59161	0.537285	Down	PC9GR
MIR548AC	-1.51532	0.699863	Down	PC9GR
MIR339	-1.39676	0.818098	Down	PC9GR
MIR3605	-0.996595	0.585084	Down	PC9GR
MIR3176	-0.780622	1.11967	Down	PC9GR
MIR3192	-0.770779	0.662257	Down	PC9GR
MIR3677	-0.76795	0.584034	Down	PC9GR
MIR4458HG	-0.583316	1.94009	Down	PC9GR
MIR25	-0.582288	0.911724	Down	PC9GR
MIR5008	-0.552955	0.648676	Down	PC9GR
MIR600HG	-0.302469	1.39867	Down	PC9GR
MIR600HG	0.402902	0.651317	Up	A549+MLN
MIR5581	0.485427	0.834321	Up	A549+MLN
MIR548AC	0.584963	0.60206	Up	A549+MLN
MIR3677	0.652077	0.546299	Up	A549+MLN
MIR3605	0.678072	0.531435	Up	A549+MLN
MIR25	0.722466	0.68214	Up	A549+MLN
MIR1249	0.736966	0.834321	Up	A549+MLN
MIR4458HG	0.819428	0.643453	Up	A549+MLN
MIR3176	1	0.989631	Up	A549+MLN
MIR200A	1.11548	0.60206	Up	A549+MLN
MIR429	1.11548	0.60206	Up	A549+MLN
MIR3192	1.16993	1.00277	Up	A549+MLN
MIR5008	1.20645	0.807553	Up	A549+MLN
MIR5194	1.24793	0.777661	Up	A549+MLN
MIR339	1.9386	0.60206	Up	A549+MLN
MIR6512	2.73697	0.771464	Up	A549+MLN

## Sheet: F6_up-pc9gr_down-a549_mirnas
mirna	log2FoldChange	antilog10pval	expression	data
MIR580	-3.05889	1.14792	Down	A549+MLN
MIR554	-1.58496	0.830962	Down	A549+MLN
MIR320B2	-1.41504	0.676298	Down	A549+MLN
MIR222	-1.20645	0.807553	Down	A549+MLN
MIR4534	-1.11548	0.60206	Down	A549+MLN
MIR553	-0.807355	0.608429	Down	A549+MLN
MIR573	-0.807355	0.531435	Down	A549+MLN
MIR3929	-0.798366	0.60206	Down	A549+MLN
MIR3653	-0.621488	0.60206	Down	A549+MLN
MIR2116	-0.347923	0.989631	Down	A549+MLN
MIR3682	-0.263034	0.60206	Down	A549+MLN
MIR5010	-0.241008	0.505268	Down	A549+MLN
MIR503HG	-0.222392	0.633056	Down	A549+MLN
MIR6819	-0.192645	0.60206	Down	A549+MLN
MIR4534	0.155504	0.515291	Up	PC9GR
MIR3682	0.386665	0.64433	Up	PC9GR
MIR503HG	0.74317	2.09153	Up	PC9GR
MIR3653	1.01116	0.684269	Up	PC9GR
MIR553	1.02005	0.966732	Up	PC9GR
MIR320B2	1.02531	0.594848	Up	PC9GR
MIR573	1.02599	1.36561	Up	PC9GR
MIR554	1.57963	0.712599	Up	PC9GR
MIR3929	1.59872	0.716674	Up	PC9GR
MIR6819	1.62009	1.06158	Up	PC9GR
MIR2116	1.62131	0.715253	Up	PC9GR
MIR5010	2.04551	1.28567	Up	PC9GR
MIR580	2.61157	1.34573	Up	PC9GR
MIR222	3.32907	1.91831	Up	PC9GR
